# Supplementary material for: A multi-omics analysis strategy reveals the molecular mechanism of the inhibition of Escherichia coli O157:H7 by anthocyanins from Aronia melanocarpa and its application
Source: Royal Society of Chemistry journal article supplement (doi:10.1039/d3fo00406f), 2023-01-01
Supplement: d3fo00406f1.pdf [file d3fo00406f1.pdf]

**Multi-omics analyses strategy reveals the molecular mechanism of  
the inhibition of *Escherichia coli* O157: H7 by anthocyanins from  
*Aronia melanocarpa* and its application**

Haotian Deng<sup>1</sup>, Li Li<sup>1\*</sup>, and Xianjun Meng<sup>1\*</sup>

<sup>1</sup>College of Food Science, Shenyang Agricultural University, Shenyang, Liaoning Province, China,  
110866

\*Corresponding author:

Tel.: +86 186 4030 6640

E-mail address: lili1231105@126.com (L. Li)

Tel.: +86 133 9011 7107

E-mail address: mengxjsy@126.com (X. Meng)

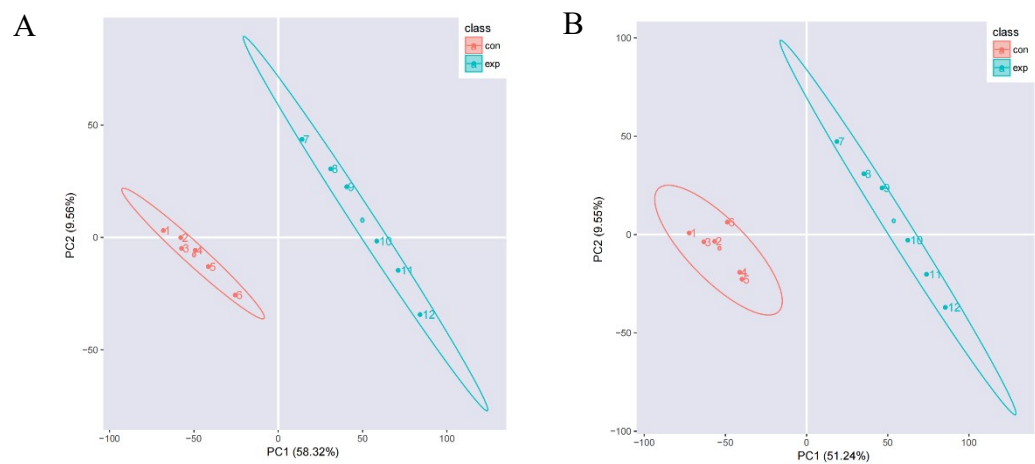

**Fig. 1S** (A) and (B) are the scores of PLS-DA discriminant analysis model under positive and negative ion mode respectively.

**Table S1** Program setting of LC-MS.

| Liquid chromatography |                 |                  |           |             | Tandem mass spectrometer |                         |            |                  |
|-----------------------|-----------------|------------------|-----------|-------------|--------------------------|-------------------------|------------|------------------|
| Time                  | Solvent A:      | Column           | Flow rate | Injection   | capillary voltages       | capillary voltages (kV, | mass range | Ion source       |
| (min)                 | Solvent B (v:v) | temperature (°C) | (mL/min)  | volume (μL) | (Kv, positive ion        | negative ion mode)      | (Da)       | temperature (°C) |
|                       |                 |                  |           |             | mode)                    |                         |            |                  |
| 0                     | 95%:5%          |                  |           |             |                          |                         |            |                  |
| 0.5                   | 20%:80%         | 50               | 0.3       | 10          | 5                        | -4.5                    | 50-1200    | 650              |
| 5                     | 0%:100%         |                  |           |             |                          |                         |            |                  |
| 8                     | 95%:5%          |                  |           |             |                          |                         |            |                  |

**Table S2** Analysis and summary of differential metabolic pathways.

| Pathway                                  | Total | Expected | Hits | Raw p | -log(p) | Holm p | FDR  | Impact |
|------------------------------------------|-------|----------|------|-------|---------|--------|------|--------|
| Galactose metabolism                     | 39    | 2.76     | 10   | 0.00  | 3.68    | 0.02   | 0.02 | 0.23   |
| Pyruvate metabolism                      | 26    | 1.84     | 6    | 0.01  | 2.12    | 0.65   | 0.28 | 0.12   |
| Citrate cycle (TCA cycle)                | 20    | 1.42     | 5    | 0.01  | 1.98    | 0.88   | 0.28 | 0.23   |
| Glycolysis / Gluconeogenesis             | 29    | 2.05     | 6    | 0.01  | 1.88    | 1      | 0.28 | 0.47   |
| Nicotinate and nicotinamide metabolism   | 15    | 1.06     | 4    | 0.02  | 1.76    | 1      | 0.30 | 0.10   |
| Purine metabolism                        | 73    | 5.17     | 10   | 0.03  | 1.56    | 1      | 0.39 | 0.12   |
| Methane metabolism                       | 26    | 1.84     | 5    | 0.03  | 1.50    | 1      | 0.39 | 0.42   |
| Sphingolipid metabolism                  | 5     | 0.35     | 2    | 0.04  | 1.37    | 1      | 0.46 | 0.00   |
| Starch and sucrose metabolism            | 22    | 1.56     | 4    | 0.06  | 1.19    | 1      | 0.61 | 0.21   |
| Glycerolipid metabolism                  | 14    | 0.99     | 3    | 0.07  | 1.15    | 1      | 0.61 | 0.10   |
| Inositol phosphate metabolism            | 8     | 0.57     | 2    | 0.10  | 0.98    | 1      | 0.75 | 0.00   |
| Pentose phosphate pathway                | 26    | 1.84     | 4    | 0.11  | 0.98    | 1      | 0.75 | 0.26   |
| Lysine degradation                       | 17    | 1.20     | 3    | 0.11  | 0.95    | 1      | 0.75 | 0.28   |
| Glycerophospholipid metabolism           | 22    | 1.56     | 3    | 0.20  | 0.70    | 1      | 1    | 0.07   |
| Pentose and glucuronate interconversions | 35    | 2.48     | 4    | 0.23  | 0.64    | 1      | 1    | 0.00   |

|                                                         |    |      |   |      |      |   |   |      |
|---------------------------------------------------------|----|------|---|------|------|---|---|------|
| Glyoxylate and dicarboxylate metabolism                 | 37 | 2.62 | 4 | 0.26 | 0.58 | 1 | 1 | 0.09 |
| Pyrimidine metabolism                                   | 51 | 3.61 | 5 | 0.29 | 0.54 | 1 | 1 | 0.05 |
| Polyketide sugar unit biosynthesis                      | 5  | 0.35 | 1 | 0.31 | 0.51 | 1 | 1 | 0.00 |
| Biosynthesis of siderophore group nonribosomal peptides | 5  | 0.35 | 1 | 0.31 | 0.51 | 1 | 1 | 0.30 |
| Butanoate metabolism                                    | 17 | 1.20 | 2 | 0.34 | 0.47 | 1 | 1 | 0.06 |
| D-Glutamine and D-glutamate metabolism                  | 7  | 0.50 | 1 | 0.40 | 0.39 | 1 | 1 | 0.00 |
| Phenylalanine metabolism                                | 33 | 2.34 | 3 | 0.42 | 0.38 | 1 | 1 | 0.00 |
| Glycine, serine and threonine metabolism                | 33 | 2.34 | 3 | 0.42 | 0.38 | 1 | 1 | 0.09 |
| Fructose and mannose metabolism                         | 33 | 2.34 | 3 | 0.42 | 0.38 | 1 | 1 | 0.24 |
| Aminobenzoate degradation                               | 8  | 0.57 | 1 | 0.45 | 0.35 | 1 | 1 | 0.00 |
| Alanine, aspartate and glutamate metabolism             | 22 | 1.56 | 2 | 0.47 | 0.33 | 1 | 1 | 0.00 |
| Valine, leucine and isoleucine biosynthesis             | 22 | 1.56 | 2 | 0.47 | 0.33 | 1 | 1 | 0.13 |
| Glutathione metabolism                                  | 22 | 1.56 | 2 | 0.47 | 0.33 | 1 | 1 | 0.38 |
| Porphyrin and chlorophyll metabolism                    | 36 | 2.55 | 3 | 0.48 | 0.32 | 1 | 1 | 0.13 |
| Streptomycin biosynthesis                               | 9  | 0.64 | 1 | 0.49 | 0.31 | 1 | 1 | 0.00 |
| Pantothenate and CoA biosynthesis                       | 24 | 1.70 | 2 | 0.52 | 0.29 | 1 | 1 | 0.11 |

---

|                                                     |    |      |   |      |      |   |   |      |
|-----------------------------------------------------|----|------|---|------|------|---|---|------|
| Tyrosine metabolism                                 | 10 | 0.71 | 1 | 0.52 | 0.28 | 1 | 1 | 0.00 |
| Propanoate metabolism                               | 27 | 1.91 | 2 | 0.58 | 0.23 | 1 | 1 | 0.05 |
| Riboflavin metabolism                               | 13 | 0.92 | 1 | 0.62 | 0.21 | 1 | 1 | 0.00 |
| Vitamin B6 metabolism                               | 13 | 0.92 | 1 | 0.62 | 0.21 | 1 | 1 | 0.17 |
| Arginine and proline metabolism                     | 29 | 2.05 | 2 | 0.62 | 0.21 | 1 | 1 | 0.10 |
| Ubiquinone and other terpenoid-quinone biosynthesis | 15 | 1.06 | 1 | 0.67 | 0.17 | 1 | 1 | 0.00 |
| Arginine biosynthesis                               | 16 | 1.13 | 1 | 0.69 | 0.16 | 1 | 1 | 0.00 |
| Terpenoid backbone biosynthesis                     | 16 | 1.13 | 1 | 0.69 | 0.16 | 1 | 1 | 0.00 |
| Cyanoamino acid metabolism                          | 17 | 1.20 | 1 | 0.72 | 0.15 | 1 | 1 | 0.00 |
| Peptidoglycan biosynthesis                          | 17 | 1.20 | 1 | 0.72 | 0.15 | 1 | 1 | 0.07 |
| Ascorbate and aldarate metabolism                   | 18 | 1.27 | 1 | 0.74 | 0.13 | 1 | 1 | 0.00 |
| Sulfur metabolism                                   | 20 | 1.42 | 1 | 0.77 | 0.11 | 1 | 1 | 0.04 |
| Cysteine and methionine metabolism                  | 40 | 2.83 | 2 | 0.79 | 0.10 | 1 | 1 | 0.00 |
| Valine, leucine and isoleucine degradation          | 23 | 1.63 | 1 | 0.82 | 0.09 | 1 | 1 | 0.00 |
| Phenylalanine, tyrosine and tryptophan biosynthesis | 23 | 1.63 | 1 | 0.82 | 0.09 | 1 | 1 | 0.00 |

|                                             |    |      |   |      |      |   |   |      |
|---------------------------------------------|----|------|---|------|------|---|---|------|
| Thiamine metabolism                         | 23 | 1.63 | 1 | 0.82 | 0.09 | 1 | 1 | 0.00 |
| Folate biosynthesis                         | 38 | 2.69 | 1 | 0.94 | 0.03 | 1 | 1 | 0.06 |
| Fatty acid degradation                      | 41 | 2.90 | 1 | 0.95 | 0.02 | 1 | 1 | 0.03 |
| Amino sugar and nucleotide sugar metabolism | 44 | 3.12 | 1 | 0.96 | 0.02 | 1 | 1 | 0.00 |
| Aminoacyl-tRNA biosynthesis                 | 45 | 3.19 | 1 | 0.97 | 0.02 | 1 | 1 | 0.00 |

Note: the Total is the total number of compounds in the pathway; the Hits is the actually matched number from the user uploaded data; the Raw p is the original p value calculated from the enrichment analysis; the Holm p is the p value adjusted by Holm-Bonferroni method; the FDR p is the p value adjusted using False Discovery Rate; the Impact is the pathway impact value calculated from pathway topology analysis.
