# Supplementary material for: A multi-omics analysis strategy reveals the molecular mechanism of the inhibition of Escherichia coli O157:H7 by anthocyanins from Aronia melanocarpa and its application
Source: Royal Society of Chemistry journal article supplement (doi:10.1039/d3fo00406f), 2023-01-01
Supplement: d3fo00406f3.xlsx [file d3fo00406f3.xlsx]

## Sheet: Sheet1
ID	ratio	t.test_p.value	wilcox.test_p.value	t.test_p.value_BHcorrect	wilcox.test_p.value_BHcorrect	VIP	sample	cv	compound_id	compound_name差异代谢物	kegg_id	formula	monoisotopic_mass单同位素质量	adduct	adduct_type	adduct_m/z	delta(ppm)	pathway
M585T138	0.181343	0.0027184	0.0021645	0.0107541	0.0078766	1.64685	exp:con	0.160074	HMDB0039780	N-(1-Deoxy-1-fructosyl)isoleucine	n/a	C12H23NO7	293.147	2M-H	-	585.288	4	n/a
M585T138	0.181343	0.0027184	0.0021645	0.0107541	0.0078766	1.64685	exp:con	0.160074	HMDB0037840	N-(1-Deoxy-1-fructosyl)leucine	n/a	C12H23NO7	293.147	2M-H	-	585.288	4	n/a
M585T138	0.181343	0.0027184	0.0021645	0.0107541	0.0078766	1.64685	exp:con	0.160074	HMDB0144664	6-[2-(diethylamino)ethoxy]-3,4,5-trihydroxyoxane-2-carboxylic acid	n/a	C12H23NO7	293.147	2M-H	-	585.288	4	n/a
M585T138	0.181343	0.0027184	0.0021645	0.0107541	0.0078766	1.64685	exp:con	0.160074	HMDB0168732	[(6-carboxy-3,4-dihydroxyoxan-2-yl)oxy]diethyl(2-hydroxyethyl)azanium	n/a	C12H24NO7	294.155	2M-H	-	585.288	4	n/a
M607T70_2	0.459563	0.00170131	0.0021645	0.00772139	0.0078766	1.14664	exp:con	0.00457752	HMDB0061135	Demonomethylchlorpromazine	n/a	C16H17ClN2S	304.08	2M-H	-	607.153	3	n/a
M607T70_2	0.459563	0.00170131	0.0021645	0.00772139	0.0078766	1.14664	exp:con	0.00457752	HMDB0163720	3,4,5-trihydroxy-6-{[(2Z)-3-methyl-4-oxopent-2-enoyl]oxy}oxane-2-carboxylic acid	n/a	C12H16O9	304.079	2M-H	-	607.152	5	n/a
M607T70_2	0.459563	0.00170131	0.0021645	0.00772139	0.0078766	1.14664	exp:con	0.00457752	HMDB0173550	3,4,5-trihydroxy-6-{[5-(hydroxymethyl)furan-2-yl]methoxy}oxane-2-carboxylic acid	n/a	C12H16O9	304.079	2M-H	-	607.152	5	n/a
M607T70_2	0.459563	0.00170131	0.0021645	0.00772139	0.0078766	1.14664	exp:con	0.00457752	HMDB0179382	6-{[(4Z)-5-carboxypenta-2,4-dien-1-yl]oxy}-3,4,5-trihydroxyoxane-2-carboxylic acid	n/a	C12H16O9	304.079	2M-H	-	607.152	5	n/a
M607T70_2	0.459563	0.00170131	0.0021645	0.00772139	0.0078766	1.14664	exp:con	0.00457752	HMDB0179383	3,4,5-trihydroxy-6-{[(2Z)-6-hydroxyhexa-2,4-dienoyl]oxy}oxane-2-carboxylic acid	n/a	C12H16O9	304.079	2M-H	-	607.152	5	n/a
M607T70_2	0.459563	0.00170131	0.0021645	0.00772139	0.0078766	1.14664	exp:con	0.00457752	HMDB0179388	3,4,5-trihydroxy-6-{[(2Z)-3-(3-methyloxiran-2-yl)prop-2-enoyl]oxy}oxane-2-carboxylic acid	n/a	C12H16O9	304.079	2M-H	-	607.152	5	n/a
M607T70_2	0.459563	0.00170131	0.0021645	0.00772139	0.0078766	1.14664	exp:con	0.00457752	HMDB0179385	3,4,5-trihydroxy-6-{3-[(1E)-prop-1-en-1-yl]oxirane-2-carbonyloxy}oxane-2-carboxylic acid	n/a	C12H16O9	304.079	2M-H	-	607.152	5	n/a
M607T108_2	2.12096	0.00180216	0.0021645	0.00802689	0.0078766	1.0098	exp:con	1.49e-07	HMDB0061135	Demonomethylchlorpromazine	n/a	C16H17ClN2S	304.08	2M-H	-	607.153	3	n/a
M607T108_2	2.12096	0.00180216	0.0021645	0.00802689	0.0078766	1.0098	exp:con	1.49e-07	HMDB0179388	3,4,5-trihydroxy-6-{[(2Z)-3-(3-methyloxiran-2-yl)prop-2-enoyl]oxy}oxane-2-carboxylic acid	n/a	C12H16O9	304.079	2M-H	-	607.152	5	n/a
M607T108_2	2.12096	0.00180216	0.0021645	0.00802689	0.0078766	1.0098	exp:con	1.49e-07	HMDB0179383	3,4,5-trihydroxy-6-{[(2Z)-6-hydroxyhexa-2,4-dienoyl]oxy}oxane-2-carboxylic acid	n/a	C12H16O9	304.079	2M-H	-	607.152	5	n/a
M607T108_2	2.12096	0.00180216	0.0021645	0.00802689	0.0078766	1.0098	exp:con	1.49e-07	HMDB0179382	6-{[(4Z)-5-carboxypenta-2,4-dien-1-yl]oxy}-3,4,5-trihydroxyoxane-2-carboxylic acid	n/a	C12H16O9	304.079	2M-H	-	607.152	5	n/a
M607T108_2	2.12096	0.00180216	0.0021645	0.00802689	0.0078766	1.0098	exp:con	1.49e-07	HMDB0179385	3,4,5-trihydroxy-6-{3-[(1E)-prop-1-en-1-yl]oxirane-2-carbonyloxy}oxane-2-carboxylic acid	n/a	C12H16O9	304.079	2M-H	-	607.152	5	n/a
M607T108_2	2.12096	0.00180216	0.0021645	0.00802689	0.0078766	1.0098	exp:con	1.49e-07	HMDB0173550	3,4,5-trihydroxy-6-{[5-(hydroxymethyl)furan-2-yl]methoxy}oxane-2-carboxylic acid	n/a	C12H16O9	304.079	2M-H	-	607.152	5	n/a
M607T108_2	2.12096	0.00180216	0.0021645	0.00802689	0.0078766	1.0098	exp:con	1.49e-07	HMDB0163720	3,4,5-trihydroxy-6-{[(2Z)-3-methyl-4-oxopent-2-enoyl]oxy}oxane-2-carboxylic acid	n/a	C12H16O9	304.079	2M-H	-	607.152	5	n/a
M641T135	0.168671	0.00250531	0.0021645	0.0101666	0.0078766	1.6738	exp:con	0.155223	HMDB0174909	2-amino-N-[2-(4-hydroxyphenyl)ethenyl]-3-(1H-indol-3-yl)propanimidic acid	n/a	C19H19N3O2	321.148	2M-H	-	641.288	1	n/a
M641T135	0.168671	0.00250531	0.0021645	0.0101666	0.0078766	1.6738	exp:con	0.155223	HMDB0061011	N-desmethylalmotriptan	n/a	C16H23N3O2S	321.151	2M-H	-	641.295	9	n/a
M651T103	6.57901	0.000200957	0.0021645	0.00182491	0.0078766	1.93828	exp:con	4.41e-10	HMDB0155257	6-{[2,4-dihydroxy-5-(hydroxymethyl)oxolan-3-yl]oxy}-3,4,5-trihydroxyoxane-2-carboxylic acid	n/a	C11H18O11	326.085	2M-H	-	651.163	2	n/a
M651T103	6.57901	0.000200957	0.0021645	0.00182491	0.0078766	1.93828	exp:con	4.41e-10	HMDB0127654	6-[2-carboxy-2,2-bis(hydroxymethyl)ethoxy]-3,4,5-trihydroxyoxane-2-carboxylic acid	n/a	C11H18O11	326.085	2M-H	-	651.163	2	n/a
M651T103	6.57901	0.000200957	0.0021645	0.00182491	0.0078766	1.93828	exp:con	4.41e-10	HMDB0148465	3,4,5-trihydroxy-6-[(4,5,6-trihydroxyoxan-3-yl)oxy]oxane-2-carboxylic acid	n/a	C11H18O11	326.085	2M-H	-	651.163	2	n/a
M651T103	6.57901	0.000200957	0.0021645	0.00182491	0.0078766	1.93828	exp:con	4.41e-10	HMDB0160647	3,4,5-trihydroxy-6-[(1,2,5-trihydroxy-4-oxopentan-3-yl)oxy]oxane-2-carboxylic acid	n/a	C11H18O11	326.085	2M-H	-	651.163	2	n/a
M651T103	6.57901	0.000200957	0.0021645	0.00182491	0.0078766	1.93828	exp:con	4.41e-10	HMDB0157901	6-[(1-carboxy-3,4-dihydroxybutan-2-yl)oxy]-3,4,5-trihydroxyoxane-2-carboxylic acid	n/a	C11H18O11	326.085	2M-H	-	651.163	2	n/a
M651T103	6.57901	0.000200957	0.0021645	0.00182491	0.0078766	1.93828	exp:con	4.41e-10	HMDB0157903	6-(4-carboxy-2,3-dihydroxybutoxy)-3,4,5-trihydroxyoxane-2-carboxylic acid	n/a	C11H18O11	326.085	2M-H	-	651.163	2	n/a
M651T103	6.57901	0.000200957	0.0021645	0.00182491	0.0078766	1.93828	exp:con	4.41e-10	HMDB0157902	6-[(4-carboxy-1,3-dihydroxybutan-2-yl)oxy]-3,4,5-trihydroxyoxane-2-carboxylic acid	n/a	C11H18O11	326.085	2M-H	-	651.163	2	n/a
M651T103	6.57901	0.000200957	0.0021645	0.00182491	0.0078766	1.93828	exp:con	4.41e-10	HMDB0157904	3,4,5-trihydroxy-6-[(3,4,5-trihydroxypentanoyl)oxy]oxane-2-carboxylic acid	n/a	C11H18O11	326.085	2M-H	-	651.163	2	n/a
M651T103	6.57901	0.000200957	0.0021645	0.00182491	0.0078766	1.93828	exp:con	4.41e-10	HMDB0160646	3,4,5-trihydroxy-6-[(1,3,5-trihydroxy-4-oxopentan-2-yl)oxy]oxane-2-carboxylic acid	n/a	C11H18O11	326.085	2M-H	-	651.163	2	n/a
M651T103	6.57901	0.000200957	0.0021645	0.00182491	0.0078766	1.93828	exp:con	4.41e-10	HMDB0127655	3,4,5-trihydroxy-6-{[3-hydroxy-2,2-bis(hydroxymethyl)propanoyl]oxy}oxane-2-carboxylic acid	n/a	C11H18O11	326.085	2M-H	-	651.163	2	n/a
M651T103	6.57901	0.000200957	0.0021645	0.00182491	0.0078766	1.93828	exp:con	4.41e-10	HMDB0148464	3,4,5-trihydroxy-6-[(2,3,5-trihydroxyoxan-4-yl)oxy]oxane-2-carboxylic acid	n/a	C11H18O11	326.085	2M-H	-	651.163	2	n/a
M651T103	6.57901	0.000200957	0.0021645	0.00182491	0.0078766	1.93828	exp:con	4.41e-10	HMDB0039723	3-O-alpha-D-Glucopyranuronosyl-D-xylose	n/a	C11H18O11	326.085	2M-H	-	651.163	2	n/a
M651T103	6.57901	0.000200957	0.0021645	0.00182491	0.0078766	1.93828	exp:con	4.41e-10	HMDB0040737	Aldobiouronic acid D3	n/a	C11H18O11	326.085	2M-H	-	651.163	2	n/a
M651T103	6.57901	0.000200957	0.0021645	0.00182491	0.0078766	1.93828	exp:con	4.41e-10	HMDB0187612	6-{[2,4-dihydroxy-2-(hydroxymethyl)oxolan-3-yl]oxy}-3,4,5-trihydroxyoxane-2-carboxylic acid	n/a	C11H18O11	326.085	2M-H	-	651.163	2	n/a
M651T103	6.57901	0.000200957	0.0021645	0.00182491	0.0078766	1.93828	exp:con	4.41e-10	HMDB0187613	6-{[4,5-dihydroxy-5-(hydroxymethyl)oxolan-3-yl]oxy}-3,4,5-trihydroxyoxane-2-carboxylic acid	n/a	C11H18O11	326.085	2M-H	-	651.163	2	n/a
M651T103	6.57901	0.000200957	0.0021645	0.00182491	0.0078766	1.93828	exp:con	4.41e-10	HMDB0155258	3,4,5-trihydroxy-6-[(3,4,5-trihydroxyoxolan-2-yl)methoxy]oxane-2-carboxylic acid	n/a	C11H18O11	326.085	2M-H	-	651.163	2	n/a
M651T103	6.57901	0.000200957	0.0021645	0.00182491	0.0078766	1.93828	exp:con	4.41e-10	HMDB0187614	3,4,5-trihydroxy-6-[(2,3,4-trihydroxyoxolan-2-yl)methoxy]oxane-2-carboxylic acid	n/a	C11H18O11	326.085	2M-H	-	651.163	2	n/a
M651T103	6.57901	0.000200957	0.0021645	0.00182491	0.0078766	1.93828	exp:con	4.41e-10	HMDB0160648	3,4,5-trihydroxy-6-[(3,4,5-trihydroxy-2-oxopentyl)oxy]oxane-2-carboxylic acid	n/a	C11H18O11	326.085	2M-H	-	651.163	2	n/a
M651T103	6.57901	0.000200957	0.0021645	0.00182491	0.0078766	1.93828	exp:con	4.41e-10	HMDB0160645	3,4,5-trihydroxy-6-[(2,3,5-trihydroxy-4-oxopentyl)oxy]oxane-2-carboxylic acid	n/a	C11H18O11	326.085	2M-H	-	651.163	2	n/a
M687T137	2.7629	1.29e-06	0.0021645	0.000106476	0.0078766	1.47971	exp:con	0.211254	HMDB0171360	8-(4-hydroxy-3-methoxyphenyl)-7-(hydroxymethyl)-3-methoxy-6-methyl-5,6,7,8-tetrahydronaphthalen-2-ol	n/a	C20H24O5	344.162	2M-H	-	687.317	5	n/a
M687T137	2.7629	1.29e-06	0.0021645	0.000106476	0.0078766	1.47971	exp:con	0.211254	HMDB0131013	7-hydroxy-8-methoxy-6-(3-methylbut-2-en-1-yl)-3-[2-(oxiran-2-yl)propan-2-yl]-2H-chromen-2-one	n/a	C20H24O5	344.162	2M-H	-	687.317	5	n/a
M687T137	2.7629	1.29e-06	0.0021645	0.000106476	0.0078766	1.47971	exp:con	0.211254	HMDB0131011	7-hydroxy-6-(4-hydroxy-3-methylbut-2-en-1-yl)-8-methoxy-3-(2-methylbut-3-en-2-yl)-2H-chromen-2-one	n/a	C20H24O5	344.162	2M-H	-	687.317	5	n/a
M687T137	2.7629	1.29e-06	0.0021645	0.000106476	0.0078766	1.47971	exp:con	0.211254	HMDB0171359	8-(4-hydroxy-3-methoxyphenyl)-6-(hydroxymethyl)-3-methoxy-7-methyl-5,6,7,8-tetrahydronaphthalen-2-ol	n/a	C20H24O5	344.162	2M-H	-	687.317	5	n/a
M687T137	2.7629	1.29e-06	0.0021645	0.000106476	0.0078766	1.47971	exp:con	0.211254	HMDB0171358	4-(4-hydroxy-3-methoxyphenyl)-7-methoxy-2,3-dimethyl-1,2,3,4-tetrahydronaphthalene-1,6-diol	n/a	C20H24O5	344.162	2M-H	-	687.317	5	n/a
M687T137	2.7629	1.29e-06	0.0021645	0.000106476	0.0078766	1.47971	exp:con	0.211254	HMDB0171355	8-(4-hydroxy-3-methoxyphenyl)-3-methoxy-6,7-dimethyl-5,6,7,8-tetrahydronaphthalene-1,2-diol	n/a	C20H24O5	344.162	2M-H	-	687.317	5	n/a
M687T137	2.7629	1.29e-06	0.0021645	0.000106476	0.0078766	1.47971	exp:con	0.211254	HMDB0171354	5-(7-hydroxy-6-methoxy-2,3-dimethyl-1,2,3,4-tetrahydronaphthalen-1-yl)-3-methoxybenzene-1,2-diol	n/a	C20H24O5	344.162	2M-H	-	687.317	5	n/a
M687T137	2.7629	1.29e-06	0.0021645	0.000106476	0.0078766	1.47971	exp:con	0.211254	HMDB0140161	5-(2-hydroxy-1-methoxypropyl)-2-(3-methoxyphenyl)-3-methyl-2,3-dihydro-1-benzofuran-7-ol	n/a	C20H24O5	344.162	2M-H	-	687.317	5	n/a
M687T137	2.7629	1.29e-06	0.0021645	0.000106476	0.0078766	1.47971	exp:con	0.211254	HMDB0136701	5-[(6-hydroxy-3,7-dimethylocta-2,7-dien-1-yl)oxy]-7-methoxy-2H-chromen-2-one	n/a	C20H24O5	344.162	2M-H	-	687.317	5	n/a
M687T137	2.7629	1.29e-06	0.0021645	0.000106476	0.0078766	1.47971	exp:con	0.211254	HMDB0131014	6-[(3,3-dimethyloxiran-2-yl)methyl]-7-hydroxy-8-methoxy-3-(2-methylbut-3-en-2-yl)-2H-chromen-2-one	n/a	C20H24O5	344.162	2M-H	-	687.317	5	n/a
M687T137	2.7629	1.29e-06	0.0021645	0.000106476	0.0078766	1.47971	exp:con	0.211254	HMDB0131015	7-hydroxy-3-(1-hydroxy-2-methylbut-3-en-2-yl)-8-methoxy-6-(3-methylbut-2-en-1-yl)-2H-chromen-2-one	n/a	C20H24O5	344.162	2M-H	-	687.317	5	n/a
M687T137	2.7629	1.29e-06	0.0021645	0.000106476	0.0078766	1.47971	exp:con	0.211254	HMDB0171362	MCULE-2726887323	n/a	C20H24O5	344.162	2M-H	-	687.317	5	n/a
M687T137	2.7629	1.29e-06	0.0021645	0.000106476	0.0078766	1.47971	exp:con	0.211254	HMDB0040421	Safficinolide	n/a	C20H24O5	344.162	2M-H	-	687.317	5	n/a
M687T137	2.7629	1.29e-06	0.0021645	0.000106476	0.0078766	1.47971	exp:con	0.211254	HMDB0040388	Columbaridione	n/a	C20H24O5	344.162	2M-H	-	687.317	5	n/a
M687T137	2.7629	1.29e-06	0.0021645	0.000106476	0.0078766	1.47971	exp:con	0.211254	HMDB0038219	Rosmadial	n/a	C20H24O5	344.162	2M-H	-	687.317	5	n/a
M687T137	2.7629	1.29e-06	0.0021645	0.000106476	0.0078766	1.47971	exp:con	0.211254	HMDB0031753	2-(4-Allyl-2-methoxyphenoxy)-1-(4-hydroxy-3-methoxyphenyl)-1-propanol	n/a	C20H24O5	344.162	2M-H	-	687.317	5	n/a
M687T137	2.7629	1.29e-06	0.0021645	0.000106476	0.0078766	1.47971	exp:con	0.211254	HMDB0031889	(1(10)E,4E,6a,8b)-8-Angeloyloxy-14-oxo-1(10),4,11(13)-germacratrien-12,6-olide	n/a	C20H24O5	344.162	2M-H	-	687.317	5	n/a
M687T137	2.7629	1.29e-06	0.0021645	0.000106476	0.0078766	1.47971	exp:con	0.211254	HMDB0036691	3-Dehydronobilin	n/a	C20H24O5	344.162	2M-H	-	687.317	5	n/a
M687T137	2.7629	1.29e-06	0.0021645	0.000106476	0.0078766	1.47971	exp:con	0.211254	HMDB0034179	Malabaricano	n/a	C20H24O5	344.162	2M-H	-	687.317	5	n/a
M687T137	2.7629	1.29e-06	0.0021645	0.000106476	0.0078766	1.47971	exp:con	0.211254	HMDB0032955	5-(6-Hydroxy-3,7-dimethyl-2,7-octadienyloxy)-7-methoxycoumarin	n/a	C20H24O5	344.162	2M-H	-	687.317	5	n/a
M687T137	2.7629	1.29e-06	0.0021645	0.000106476	0.0078766	1.47971	exp:con	0.211254	HMDB0038690	Isoachifolidiene	n/a	C20H24O5	344.162	2M-H	-	687.317	5	n/a
M687T137	2.7629	1.29e-06	0.0021645	0.000106476	0.0078766	1.47971	exp:con	0.211254	HMDB0171361	4-(4-hydroxy-3-methoxyphenyl)-7-methoxy-2,3-dimethyl-1,2,3,4-tetrahydronaphthalene-2,6-diol	n/a	C20H24O5	344.162	2M-H	-	687.317	5	n/a
M707T48_2	2.33856	0.00133867	0.0021645	0.00649676	0.0078766	1.30571	exp:con	0.172861	HMDB0114763	LysoPA(i-12:0/0:0)	n/a	C15H31O7P	354.181	2M-H	-	707.354	1	n/a
M707T48_2	2.33856	0.00133867	0.0021645	0.00649676	0.0078766	1.30571	exp:con	0.172861	HMDB0062319	1-lauroyl-sn-glycerol 3-phosphate	n/a	C15H31O7P	354.181	2M-H	-	707.354	1	n/a
M707T48_2	2.33856	0.00133867	0.0021645	0.00649676	0.0078766	1.30571	exp:con	0.172861	HMDB0031877	Acetylsalvipisone	n/a	C22H26O4	354.183	2M-H	-	707.359	7	n/a
M715T138	0.114448	0.00118807	0.0021645	0.00599084	0.0078766	1.90723	exp:con	0.0837845	HMDB0184991	(1R,2R,10S,11S,14E,15S)-8-hydroxy-14-(1-methoxyethylidene)-2,15-dimethyltetracyclo[8.7.0.0²,⁷.0¹¹,¹⁵]heptadec-6-ene-5,13-dione	n/a	C22H30O4	358.214	2M-H	-	715.422	10	n/a
M715T138	0.114448	0.00118807	0.0021645	0.00599084	0.0078766	1.90723	exp:con	0.0837845	HMDB0184990	(1R,2R,10R,11S,14E,15S)-17-hydroxy-14-(1-methoxyethylidene)-2,15-dimethyltetracyclo[8.7.0.0²,⁷.0¹¹,¹⁵]heptadec-6-ene-5,13-dione	n/a	C22H30O4	358.214	2M-H	-	715.422	10	n/a
M715T138	0.114448	0.00118807	0.0021645	0.00599084	0.0078766	1.90723	exp:con	0.0837845	HMDB0184992	(1R,2S,10R,11S,14E,15S)-2-(hydroxymethyl)-14-(1-methoxyethylidene)-15-methyltetracyclo[8.7.0.0²,⁷.0¹¹,¹⁵]heptadec-6-ene-5,13-dione	n/a	C22H30O4	358.214	2M-H	-	715.422	10	n/a
M715T138	0.114448	0.00118807	0.0021645	0.00599084	0.0078766	1.90723	exp:con	0.0837845	HMDB0184993	(1R,2R,10S,11S,14E,15R)-15-(hydroxymethyl)-14-(1-methoxyethylidene)-2-methyltetracyclo[8.7.0.0²,⁷.0¹¹,¹⁵]heptadec-6-ene-5,13-dione	n/a	C22H30O4	358.214	2M-H	-	715.422	10	n/a
M715T138	0.114448	0.00118807	0.0021645	0.00599084	0.0078766	1.90723	exp:con	0.0837845	HMDB0184998	(1'R,2'R,10'S,11'S,15'S)-3-methoxy-2',3,15'-trimethylspiro[oxirane-2,14'-tetracyclo[8.7.0.0²,⁷.0¹¹,¹⁵]heptadecan]-6'-ene-5',13'-dione	n/a	C22H30O4	358.214	2M-H	-	715.422	10	n/a
M715T138	0.114448	0.00118807	0.0021645	0.00599084	0.0078766	1.90723	exp:con	0.0837845	HMDB0184996	(1R,2R,10S,11S,14E,15S)-4-hydroxy-14-(1-methoxyethylidene)-2,15-dimethyltetracyclo[8.7.0.0²,⁷.0¹¹,¹⁵]heptadec-6-ene-5,13-dione	n/a	C22H30O4	358.214	2M-H	-	715.422	10	n/a
M715T138	0.114448	0.00118807	0.0021645	0.00599084	0.0078766	1.90723	exp:con	0.0837845	HMDB0184997	(1R,2R,10S,11S,14E,15S)-6-hydroxy-14-(1-methoxyethylidene)-2,15-dimethyltetracyclo[8.7.0.0²,⁷.0¹¹,¹⁵]heptadec-6-ene-5,13-dione	n/a	C22H30O4	358.214	2M-H	-	715.422	10	n/a
M715T138	0.114448	0.00118807	0.0021645	0.00599084	0.0078766	1.90723	exp:con	0.0837845	HMDB0185007	(2R,14E,15S)-14-(1-methoxyethylidene)-2,15-dimethyltetracyclo[8.7.0.0²,⁷.0¹¹,¹⁵]heptadecane-5,6,13-trione	n/a	C22H30O4	358.214	2M-H	-	715.422	10	n/a
M715T138	0.114448	0.00118807	0.0021645	0.00599084	0.0078766	1.90723	exp:con	0.0837845	HMDB0186279	(2R,2'S,15'S)-17'-hydroxy-2',15'-dimethylspiro[oxolane-2,14'-tetracyclo[8.7.0.0²,⁷.0¹¹,¹⁵]heptadecan]-8'-ene-5,5'-dione	n/a	C22H30O4	358.214	2M-H	-	715.422	10	n/a
M715T138	0.114448	0.00118807	0.0021645	0.00599084	0.0078766	1.90723	exp:con	0.0837845	HMDB0035856	20,23-cis-Bullatalicinone	n/a	C22H30O4	358.214	2M-H	-	715.422	10	n/a
M715T138	0.114448	0.00118807	0.0021645	0.00599084	0.0078766	1.90723	exp:con	0.0837845	HMDB0040619	Piperoic acid	n/a	C22H30O4	358.214	2M-H	-	715.422	10	n/a
M715T138	0.114448	0.00118807	0.0021645	0.00599084	0.0078766	1.90723	exp:con	0.0837845	HMDB0033443	Sorgoleone 358	n/a	C22H30O4	358.214	2M-H	-	715.422	10	n/a
M739T52	0.481335	0.00175461	0.0021645	0.00788869	0.0078766	1.21371	exp:con	0.141079	HMDB0002886	6-Keto-prostaglandin F1a	C05961	C20H34O6	370.236	2M-H	-	739.464	2	map00590 Arachidonic acid metabolism;map01100 Metabolic pathways;
M739T52	0.481335	0.00175461	0.0021645	0.00788869	0.0078766	1.21371	exp:con	0.141079	HMDB0003252	Thromboxane B2	C05963	C20H34O6	370.236	2M-H	-	739.464	2	map00590 Arachidonic acid metabolism;map01100 Metabolic pathways;map04726 Serotonergic synapse;map04976 Bile secretion;
M739T52	0.481335	0.00175461	0.0021645	0.00788869	0.0078766	1.21371	exp:con	0.141079	HMDB0004049	20-Hydroxy-PGF2a	n/a	C20H34O6	370.236	2M-H	-	739.464	2	n/a
M739T52	0.481335	0.00175461	0.0021645	0.00788869	0.0078766	1.21371	exp:con	0.141079	HMDB0012502	10,11-dihydro-20-dihydroxy-LTB4	n/a	C20H34O6	370.236	2M-H	-	739.464	2	n/a
M739T52	0.481335	0.00175461	0.0021645	0.00788869	0.0078766	1.21371	exp:con	0.141079	HMDB0013039	Prostaglandin G1	n/a	C20H34O6	370.236	2M-H	-	739.464	2	n/a
M739T52	0.481335	0.00175461	0.0021645	0.00788869	0.0078766	1.21371	exp:con	0.141079	HMDB0062746	7-[6-(3,7-dihydroxyoct-1-en-1-yl)-2,3-dioxabicyclo[2.2.1]heptan-5-yl]heptanoic acid	n/a	C20H34O6	370.236	2M-H	-	739.464	2	n/a
M773T52	0.409591	8.08e-05	0.0021645	0.00100655	0.0078766	1.45499	exp:con	0.0940297	HMDB0061330	(E)-4-Hydroxytamoxifen	n/a	C26H29NO2	387.22	2M-H	-	773.432	0	n/a
M773T52	0.409591	8.08e-05	0.0021645	0.00100655	0.0078766	1.45499	exp:con	0.0940297	HMDB0144320	(3E)-4-{4-[2-(dimethylamino)ethoxy]phenyl}-3,4-diphenylbut-3-en-1-ol	n/a	C26H29NO2	387.22	2M-H	-	773.432	0	n/a
M773T52	0.409591	8.08e-05	0.0021645	0.00100655	0.0078766	1.45499	exp:con	0.0940297	HMDB0144319	{2-[4-(3-ethyl-2,3-diphenyloxiran-2-yl)phenoxy]ethyl}dimethylamine	n/a	C26H29NO2	387.22	2M-H	-	773.432	0	n/a
M773T52	0.409591	8.08e-05	0.0021645	0.00100655	0.0078766	1.45499	exp:con	0.0940297	HMDB0144322	1-(dimethylamino)-2-{4-[(1E)-1,2-diphenylbut-1-en-1-yl]phenoxy}ethan-1-ol	n/a	C26H29NO2	387.22	2M-H	-	773.432	0	n/a
M773T52	0.409591	8.08e-05	0.0021645	0.00100655	0.0078766	1.45499	exp:con	0.0940297	HMDB0144318	3-[(1Z)-1-{4-[2-(dimethylamino)ethoxy]phenyl}-2-phenylbut-1-en-1-yl]phenol	n/a	C26H29NO2	387.22	2M-H	-	773.432	0	n/a
M773T52	0.409591	8.08e-05	0.0021645	0.00100655	0.0078766	1.45499	exp:con	0.0940297	HMDB0144317	3-[(1E)-1-{4-[2-(dimethylamino)ethoxy]phenyl}-1-phenylbut-1-en-2-yl]phenol	n/a	C26H29NO2	387.22	2M-H	-	773.432	0	n/a
M773T52	0.409591	8.08e-05	0.0021645	0.00100655	0.0078766	1.45499	exp:con	0.0940297	HMDB0144316	4-[(1E)-1-{4-[2-(dimethylamino)ethoxy]phenyl}-1-phenylbut-1-en-2-yl]phenol	n/a	C26H29NO2	387.22	2M-H	-	773.432	0	n/a
M773T52	0.409591	8.08e-05	0.0021645	0.00100655	0.0078766	1.45499	exp:con	0.0940297	HMDB0144315	2-{4-[(1E)-1,2-diphenylbut-1-en-1-yl]phenoxy}-N,N-dimethylethanamine oxide	n/a	C26H29NO2	387.22	2M-H	-	773.432	0	n/a
M773T52	0.409591	8.08e-05	0.0021645	0.00100655	0.0078766	1.45499	exp:con	0.0940297	HMDB0144314	API0000371	n/a	C26H29NO2	387.22	2M-H	-	773.432	0	n/a
M773T52	0.409591	8.08e-05	0.0021645	0.00100655	0.0078766	1.45499	exp:con	0.0940297	HMDB0144312	2-[(1Z)-1-{4-[2-(dimethylamino)ethoxy]phenyl}-2-phenylbut-1-en-1-yl]phenol	n/a	C26H29NO2	387.22	2M-H	-	773.432	0	n/a
M773T52	0.409591	8.08e-05	0.0021645	0.00100655	0.0078766	1.45499	exp:con	0.0940297	HMDB0060530	4-Hydroxytamoxifen	C05011	C26H29NO2	387.22	2M-H	-	773.432	0	map00982 Drug metabolism - cytochrome P450;
M773T52	0.409591	8.08e-05	0.0021645	0.00100655	0.0078766	1.45499	exp:con	0.0940297	HMDB0013868	3-Hydroxytamoxifen (Droloxifene)	C14296	C26H29NO2	387.22	2M-H	-	773.432	0	n/a
M773T52	0.409591	8.08e-05	0.0021645	0.00100655	0.0078766	1.45499	exp:con	0.0940297	HMDB0060513	Tamoxifen N-oxide	C16545	C26H29NO2	387.22	2M-H	-	773.432	0	map00982 Drug metabolism - cytochrome P450;
M773T52	0.409591	8.08e-05	0.0021645	0.00100655	0.0078766	1.45499	exp:con	0.0940297	HMDB0060585	alpha-Hydroxytamoxifen	C16544	C26H29NO2	387.22	2M-H	-	773.432	0	map00982 Drug metabolism - cytochrome P450;
M773T52	0.409591	8.08e-05	0.0021645	0.00100655	0.0078766	1.45499	exp:con	0.0940297	HMDB0061328	4'-Hydroxytamoxifen	n/a	C26H29NO2	387.22	2M-H	-	773.432	0	n/a
M773T52	0.409591	8.08e-05	0.0021645	0.00100655	0.0078766	1.45499	exp:con	0.0940297	HMDB0144310	(3Z)-4-{4-[2-(dimethylamino)ethoxy]phenyl}-3,4-diphenylbut-3-en-2-ol	n/a	C26H29NO2	387.22	2M-H	-	773.432	0	n/a
M773T52	0.409591	8.08e-05	0.0021645	0.00100655	0.0078766	1.45499	exp:con	0.0940297	HMDB0144311	2-[(1E)-1-{4-[2-(dimethylamino)ethoxy]phenyl}-1-phenylbut-1-en-2-yl]phenol	n/a	C26H29NO2	387.22	2M-H	-	773.432	0	n/a
M789T52	0.369653	0.00676989	0.0021645	0.0209836	0.0078766	1.21321	exp:con	0.15792	HMDB0061324	2-({1-[(4-hydroxyphenyl)methyl]piperidin-4-yl}methyl)-5,6-dimethoxy-2,3-dihydro-1H-inden-1-one	n/a	C24H29NO4	395.21	2M-H	-	789.412	2	n/a
M789T52	0.369653	0.00676989	0.0021645	0.0209836	0.0078766	1.21321	exp:con	0.15792	HMDB0061325	rac (cis/trans) Donepezil N-Oxide	n/a	C24H29NO4	395.21	2M-H	-	789.412	2	n/a
M791T484	2.25814	0.00898381	0.0021645	0.0258586	0.0078766	1.09403	exp:con	0.0502034	HMDB0175010	4,7-dihydroxy-5-methoxy-9-oxo-10-(sulfooxy)-9,10-dihydroanthracene-2-carboxylic acid	n/a	C16H12O10S	396.015	2M-H	-	791.023	4	n/a
M791T484	2.25814	0.00898381	0.0021645	0.0258586	0.0078766	1.09403	exp:con	0.0502034	HMDB0138842	[2-hydroxy-11-(2-hydroxyphenyl)-13-oxo-4,6,10-trioxatricyclo[7.4.0.0³,⁷]trideca-1,3(7),8-trien-12-yl]oxidanesulfonic acid	n/a	C16H12O10S	396.015	2M-H	-	791.023	4	n/a
M791T484	2.25814	0.00898381	0.0021645	0.0258586	0.0078766	1.09403	exp:con	0.0502034	HMDB0146292	[2,6-dihydroxy-4-(5-hydroxy-7-methoxy-4-oxo-4H-chromen-3-yl)phenyl]oxidanesulfonic acid	n/a	C16H12O10S	396.015	2M-H	-	791.023	4	n/a
M791T484	2.25814	0.00898381	0.0021645	0.0258586	0.0078766	1.09403	exp:con	0.0502034	HMDB0146289	[5-(5,6-dihydroxy-7-methoxy-4-oxo-4H-chromen-3-yl)-2-hydroxyphenyl]oxidanesulfonic acid	n/a	C16H12O10S	396.015	2M-H	-	791.023	4	n/a
M791T484	2.25814	0.00898381	0.0021645	0.0258586	0.0078766	1.09403	exp:con	0.0502034	HMDB0150823	[5-(5,7-dihydroxy-6-methoxy-4-oxo-4H-chromen-2-yl)-2-hydroxyphenyl]oxidanesulfonic acid	n/a	C16H12O10S	396.015	2M-H	-	791.023	4	n/a
M791T484	2.25814	0.00898381	0.0021645	0.0258586	0.0078766	1.09403	exp:con	0.0502034	HMDB0150828	[5-(6,7-dihydroxy-5-methoxy-4-oxo-4H-chromen-2-yl)-2-hydroxyphenyl]oxidanesulfonic acid	n/a	C16H12O10S	396.015	2M-H	-	791.023	4	n/a
M791T484	2.25814	0.00898381	0.0021645	0.0258586	0.0078766	1.09403	exp:con	0.0502034	HMDB0151494	{[3,5,6-trihydroxy-2-(4-hydroxyphenyl)-4-oxo-4H-chromen-8-yl]methoxy}sulfonic acid	n/a	C16H12O10S	396.015	2M-H	-	791.023	4	n/a
M791T484	2.25814	0.00898381	0.0021645	0.0258586	0.0078766	1.09403	exp:con	0.0502034	HMDB0138839	[2-hydroxy-11-(4-hydroxyphenyl)-13-oxo-4,6,10-trioxatricyclo[7.4.0.0³,⁷]trideca-1,3(7),8-trien-12-yl]oxidanesulfonic acid	n/a	C16H12O10S	396.015	2M-H	-	791.023	4	n/a
M791T484	2.25814	0.00898381	0.0021645	0.0258586	0.0078766	1.09403	exp:con	0.0502034	HMDB0151507	[2-hydroxy-5-(3,5,6-trihydroxy-8-methyl-4-oxo-4H-chromen-2-yl)phenyl]oxidanesulfonic acid	n/a	C16H12O10S	396.015	2M-H	-	791.023	4	n/a
M791T484	2.25814	0.00898381	0.0021645	0.0258586	0.0078766	1.09403	exp:con	0.0502034	HMDB0152040	[2-methoxy-5-(5,7,8-trihydroxy-4-oxo-4H-chromen-2-yl)phenyl]oxidanesulfonic acid	n/a	C16H12O10S	396.015	2M-H	-	791.023	4	n/a
M791T484	2.25814	0.00898381	0.0021645	0.0258586	0.0078766	1.09403	exp:con	0.0502034	HMDB0152237	[2-(hydroxymethyl)-5-(3,5,7-trihydroxy-4-oxo-4H-chromen-2-yl)phenyl]oxidanesulfonic acid	n/a	C16H12O10S	396.015	2M-H	-	791.023	4	n/a
M791T484	2.25814	0.00898381	0.0021645	0.0258586	0.0078766	1.09403	exp:con	0.0502034	HMDB0152238	{[2-hydroxy-4-(3,5,7-trihydroxy-4-oxo-4H-chromen-2-yl)phenyl]methoxy}sulfonic acid	n/a	C16H12O10S	396.015	2M-H	-	791.023	4	n/a
M791T484	2.25814	0.00898381	0.0021645	0.0258586	0.0078766	1.09403	exp:con	0.0502034	HMDB0152322	SCHEMBL3642561	n/a	C16H12O10S	396.015	2M-H	-	791.023	4	n/a
M791T484	2.25814	0.00898381	0.0021645	0.0258586	0.0078766	1.09403	exp:con	0.0502034	HMDB0174960	[(3,4,7-trihydroxy-5-methoxy-9,10-dioxo-9,10-dihydroanthracen-2-yl)methoxy]sulfonic acid	n/a	C16H12O10S	396.015	2M-H	-	791.023	4	n/a
M791T484	2.25814	0.00898381	0.0021645	0.0258586	0.0078766	1.09403	exp:con	0.0502034	HMDB0174964	[(4,6,7-trihydroxy-5-methoxy-9,10-dioxo-9,10-dihydroanthracen-2-yl)methoxy]sulfonic acid	n/a	C16H12O10S	396.015	2M-H	-	791.023	4	n/a
M791T484	2.25814	0.00898381	0.0021645	0.0258586	0.0078766	1.09403	exp:con	0.0502034	HMDB0138835	[2-hydroxy-11-(3-hydroxyphenyl)-13-oxo-4,6,10-trioxatricyclo[7.4.0.0³,⁷]trideca-1,3(7),8-trien-12-yl]oxidanesulfonic acid	n/a	C16H12O10S	396.015	2M-H	-	791.023	4	n/a
M791T484	2.25814	0.00898381	0.0021645	0.0258586	0.0078766	1.09403	exp:con	0.0502034	HMDB0138838	(4-{2,12-dihydroxy-13-oxo-4,6,10-trioxatricyclo[7.4.0.0³,⁷]trideca-1,3(7),8-trien-11-yl}phenyl)oxidanesulfonic acid	n/a	C16H12O10S	396.015	2M-H	-	791.023	4	n/a
M791T484	2.25814	0.00898381	0.0021645	0.0258586	0.0078766	1.09403	exp:con	0.0502034	HMDB0177042	4-{[(1Z)-1-carboxy-2-(3-hydroxyphenyl)eth-1-en-1-yl]oxy}-3-(sulfooxy)benzoic acid	n/a	C16H12O10S	396.015	2M-H	-	791.023	4	n/a
M791T484	2.25814	0.00898381	0.0021645	0.0258586	0.0078766	1.09403	exp:con	0.0502034	HMDB0177041	4-{[(1Z)-1-carboxy-2-[3-(sulfooxy)phenyl]eth-1-en-1-yl]oxy}-3-hydroxybenzoic acid	n/a	C16H12O10S	396.015	2M-H	-	791.023	4	n/a
M791T484	2.25814	0.00898381	0.0021645	0.0258586	0.0078766	1.09403	exp:con	0.0502034	HMDB0128825	[3-(3,5,7-trihydroxy-6-methoxy-4-oxo-4H-chromen-2-yl)phenyl]oxidanesulfonic acid	n/a	C16H12O10S	396.015	2M-H	-	791.023	4	n/a
M791T484	2.25814	0.00898381	0.0021645	0.0258586	0.0078766	1.09403	exp:con	0.0502034	HMDB0131940	[5-(5,6-dihydroxy-7-methoxy-4-oxo-4H-chromen-2-yl)-2-hydroxyphenyl]oxidanesulfonic acid	n/a	C16H12O10S	396.015	2M-H	-	791.023	4	n/a
M791T484	2.25814	0.00898381	0.0021645	0.0258586	0.0078766	1.09403	exp:con	0.0502034	HMDB0133829	[5-(3,5-dihydroxy-7-methoxy-4-oxo-4H-chromen-2-yl)-2-hydroxyphenyl]oxidanesulfonic acid	n/a	C16H12O10S	396.015	2M-H	-	791.023	4	n/a
M791T484	2.25814	0.00898381	0.0021645	0.0258586	0.0078766	1.09403	exp:con	0.0502034	HMDB0135939	[2,6-dihydroxy-3-(7-hydroxy-5-methoxy-4-oxo-4H-chromen-3-yl)phenyl]oxidanesulfonic acid	n/a	C16H12O10S	396.015	2M-H	-	791.023	4	n/a
M791T484	2.25814	0.00898381	0.0021645	0.0258586	0.0078766	1.09403	exp:con	0.0502034	HMDB0136029	[2,6-dihydroxy-3-(5-hydroxy-7-methoxy-4-oxo-4H-chromen-3-yl)phenyl]oxidanesulfonic acid	n/a	C16H12O10S	396.015	2M-H	-	791.023	4	n/a
M791T484	2.25814	0.00898381	0.0021645	0.0258586	0.0078766	1.09403	exp:con	0.0502034	HMDB0138834	(3-{2,12-dihydroxy-13-oxo-4,6,10-trioxatricyclo[7.4.0.0³,⁷]trideca-1,3(7),8-trien-11-yl}phenyl)oxidanesulfonic acid	n/a	C16H12O10S	396.015	2M-H	-	791.023	4	n/a
M791T484	2.25814	0.00898381	0.0021645	0.0258586	0.0078766	1.09403	exp:con	0.0502034	HMDB0175006	4,7-dihydroxy-5-methoxy-10-oxo-9-(sulfooxy)-9,10-dihydroanthracene-2-carboxylic acid	n/a	C16H12O10S	396.015	2M-H	-	791.023	4	n/a
M791T484	2.25814	0.00898381	0.0021645	0.0258586	0.0078766	1.09403	exp:con	0.0502034	HMDB0240537	Isorhamnetin 3-sulfate	n/a	C16H10O10S	394.001	2M-H	-	791.023	4	n/a
M791T484	2.25814	0.00898381	0.0021645	0.0258586	0.0078766	1.09403	exp:con	0.0502034	HMDB0031554	Sucralose	C12285	C12H19Cl3O8	396.015	2M-H	-	791.022	6	map04973 Carbohydrate digestion and absorption;
M815T69	2.11483	0.000100562	0.0021645	0.00116113	0.0078766	1.29131	exp:con	2.09e-12	HMDB0039126	Wybutoxine	n/a	C16H20N6O7	408.139	2M-H	-	815.271	0	n/a
M815T69	2.11483	0.000100562	0.0021645	0.00116113	0.0078766	1.29131	exp:con	2.09e-12	HMDB0041508	Marmesin galactoside	n/a	C20H24O9	408.142	2M-H	-	815.277	7	n/a
M815T69	2.11483	0.000100562	0.0021645	0.00116113	0.0078766	1.29131	exp:con	2.09e-12	HMDB0038600	Torachrysone 8-glucoside	n/a	C20H24O9	408.142	2M-H	-	815.277	7	n/a
M815T69	2.11483	0.000100562	0.0021645	0.00116113	0.0078766	1.29131	exp:con	2.09e-12	HMDB0036862	Lepidiumterpenyl ester	n/a	C20H24O9	408.142	2M-H	-	815.277	7	n/a
M815T69	2.11483	0.000100562	0.0021645	0.00116113	0.0078766	1.29131	exp:con	2.09e-12	HMDB0154132	3,4,5-trihydroxy-6-[(3-{4-[(3-methylbut-2-en-1-yl)oxy]phenyl}prop-2-enoyl)oxy]oxane-2-carboxylic acid	n/a	C20H24O9	408.142	2M-H	-	815.277	7	n/a
M831T51	0.204199	0.00022948	0.0021645	0.00199067	0.0078766	1.80965	exp:con	0.104924	HMDB0014565	Spironolactone	C07310	C24H32O4S	416.202	2M-H	-	831.397	7	n/a
M847T96	2.40435	0.000107309	0.0021645	0.00121537	0.0078766	1.48746	exp:con	0.257535	HMDB0015244	Cefuroxime	C06894	C16H16N4O8S	424.069	2M-H	-	847.13	8	n/a
M849T69	0.478105	0.00369776	0.004329	0.0133817	0.0134018	1.056	exp:con	0.0689885	HMDB0178291	3,4,5-trihydroxy-6-{4-[2-(1-methyl-1-oxo-1λ⁵-piperidin-2-yl)acetyl]phenoxy}oxane-2-carboxylic acid	n/a	C20H27NO9	425.169	2M-H	-	849.33	8	n/a
M849T69	0.478105	0.00369776	0.004329	0.0133817	0.0134018	1.056	exp:con	0.0689885	HMDB0178286	3,4,5-trihydroxy-6-{5-hydroxy-2-[2-(1-methylpiperidin-2-yl)acetyl]phenoxy}oxane-2-carboxylic acid	n/a	C20H27NO9	425.169	2M-H	-	849.33	8	n/a
M849T69	0.478105	0.00369776	0.004329	0.0133817	0.0134018	1.056	exp:con	0.0689885	HMDB0178287	3,4,5-trihydroxy-6-{3-hydroxy-4-[2-(1-methylpiperidin-2-yl)acetyl]phenoxy}oxane-2-carboxylic acid	n/a	C20H27NO9	425.169	2M-H	-	849.33	8	n/a
M849T69	0.478105	0.00369776	0.004329	0.0133817	0.0134018	1.056	exp:con	0.0689885	HMDB0178283	3,4,5-trihydroxy-6-{2-hydroxy-4-[2-(1-methylpiperidin-2-yl)acetyl]phenoxy}oxane-2-carboxylic acid	n/a	C20H27NO9	425.169	2M-H	-	849.33	8	n/a
M849T69	0.478105	0.00369776	0.004329	0.0133817	0.0134018	1.056	exp:con	0.0689885	HMDB0178282	3,4,5-trihydroxy-6-{2-hydroxy-5-[2-(1-methylpiperidin-2-yl)acetyl]phenoxy}oxane-2-carboxylic acid	n/a	C20H27NO9	425.169	2M-H	-	849.33	8	n/a
M849T69	0.478105	0.00369776	0.004329	0.0133817	0.0134018	1.056	exp:con	0.0689885	HMDB0178278	3,4,5-trihydroxy-6-{4-[2-(6-hydroxy-1-methylpiperidin-2-yl)acetyl]phenoxy}oxane-2-carboxylic acid	n/a	C20H27NO9	425.169	2M-H	-	849.33	8	n/a
M849T69	0.478105	0.00369776	0.004329	0.0133817	0.0134018	1.056	exp:con	0.0689885	HMDB0178276	3,4,5-trihydroxy-6-{4-[2-(2-hydroxy-1-methylpiperidin-2-yl)acetyl]phenoxy}oxane-2-carboxylic acid	n/a	C20H27NO9	425.169	2M-H	-	849.33	8	n/a
M849T69	0.478105	0.00369776	0.004329	0.0133817	0.0134018	1.056	exp:con	0.0689885	HMDB0178298	3,4,5-trihydroxy-6-({1-[2-(1-methylpiperidin-2-yl)acetyl]-4-oxocyclohexa-2,5-dien-1-yl}oxy)oxane-2-carboxylic acid	n/a	C20H27NO9	425.169	2M-H	-	849.33	8	n/a
M850T200	5.64285	7.57e-06	0.0021645	0.000258618	0.0078766	1.87344	exp:con	6.97e-07	HMDB0011470	LysoPE(0:0/14:0)	n/a	C19H40NO7P	425.254	2M-H	-	849.501	0	n/a
M850T200	5.64285	7.57e-06	0.0021645	0.000258618	0.0078766	1.87344	exp:con	6.97e-07	HMDB0011500	LysoPE(14:0/0:0)	n/a	C19H40NO7P	425.254	2M-H	-	849.501	0	n/a
M883T62	0.0731716	0.00016013	0.0021645	0.00158091	0.0078766	2.23723	exp:con	6.4e-10	HMDB0151609	{4-[(5,8-dihydroxy-6,7-dimethoxy-4-oxo-3,4-dihydro-2H-1-benzopyran-3-yl)(hydroxy)methyl]phenyl}oxidanesulfonic acid	n/a	C18H18O11S	442.057	2M-H	-	883.107	2	n/a
M883T62	0.0731716	0.00016013	0.0021645	0.00158091	0.0078766	2.23723	exp:con	6.4e-10	HMDB0151610	[(5,8-dihydroxy-6,7-dimethoxy-4-oxo-3,4-dihydro-2H-1-benzopyran-3-yl)(4-hydroxyphenyl)methoxy]sulfonic acid	n/a	C18H18O11S	442.057	2M-H	-	883.107	2	n/a
M883T62	0.0731716	0.00016013	0.0021645	0.00158091	0.0078766	2.23723	exp:con	6.4e-10	HMDB0151615	{5-[(5,8-dihydroxy-6,7-dimethoxy-4-oxo-3,4-dihydro-2H-1-benzopyran-3-yl)methyl]-2-hydroxyphenyl}oxidanesulfonic acid	n/a	C18H18O11S	442.057	2M-H	-	883.107	2	n/a
M883T62	0.0731716	0.00016013	0.0021645	0.00158091	0.0078766	2.23723	exp:con	6.4e-10	HMDB0152115	{2-methoxy-4-[3-oxo-3-(2,4,6-trihydroxy-3,5-dimethoxyphenyl)prop-1-en-1-yl]phenyl}oxidanesulfonic acid	n/a	C18H18O11S	442.057	2M-H	-	883.107	2	n/a
M883T62	0.0731716	0.00016013	0.0021645	0.00158091	0.0078766	2.23723	exp:con	6.4e-10	HMDB0177019	2-[4-(2-carboxyethyl)-2-(sulfooxy)phenoxy]-3-(3,4-dihydroxyphenyl)propanoic acid	n/a	C18H18O11S	442.057	2M-H	-	883.107	2	n/a
M883T62	0.0731716	0.00016013	0.0021645	0.00158091	0.0078766	2.23723	exp:con	6.4e-10	HMDB0177018	2-[4-(2-carboxyethyl)-2-hydroxyphenoxy]-3-[4-hydroxy-3-(sulfooxy)phenyl]propanoic acid	n/a	C18H18O11S	442.057	2M-H	-	883.107	2	n/a
M930T229	2.71533	6.1e-06	0.0021645	0.000231517	0.0078766	1.53725	exp:con	0.110073	HMDB0010380	LysoPC(14:1(9Z)/0:0)	C04230	C22H44NO7P	465.286	2M-H	-	929.564	0	map00564 Glycerophospholipid metabolism;map05231 Choline metabolism in cancer;
M971T48_2	0.195981	0.000928972	0.0021645	0.00509746	0.0078766	1.72912	exp:con	7.64e-08	HMDB0164234	2-[(1-hydroxy-2-{[1-hydroxy-4-methyl-2-(sulfooxy)pentylidene]amino}-4-methyl-3-oxopentylidene)amino]-3-phenylpropanoic acid	n/a	C21H30N2O9S	486.167	2M-H	-	971.327	10	n/a
M986T275	2.07066	8.99e-06	0.0021645	0.000285314	0.0078766	1.34521	exp:con	0.103353	HMDB0010383	LysoPC(16:1(9Z)/0:0)	C04230	C24H48NO7P	493.317	2M-H	-	985.626	0	map00564 Glycerophospholipid metabolism;map05231 Choline metabolism in cancer;
M1005T48_2	0.432482	0.000191321	0.0021645	0.00176604	0.0078766	1.34702	exp:con	0.100145	HMDB0177725	2-amino-4-({1-[(carboxymethyl)-C-hydroxycarbonimidoyl]-2-{[2,3-dihydroxy-3-(4-hydroxy-3-methoxyphenyl)propyl]sulfanyl}ethyl}-C-hydroxycarbonimidoyl)butanoic acid	n/a	C20H29N3O10S	503.157	2M-H	-	1005.31	3	n/a
M1024T97_1	3.46144	0.000499947	0.0021645	0.00332266	0.0078766	1.35547	exp:con	3.69e-07	HMDB0035267	Methyl 3b-hydroxy-13(18)-oleanen-28-oate	n/a	C33H52O4	512.387	2M-H	-	1023.77	8	n/a
M1024T97_1	3.46144	0.000499947	0.0021645	0.00332266	0.0078766	1.35547	exp:con	3.69e-07	HMDB0183247	13-{[(8E)-3,7-dimethyl-9-(2,6,6-trimethylcyclohex-1-en-1-yl)nona-2,4,6,8-tetraen-1-yl]oxy}-13-oxotridecanoic acid	n/a	C33H52O4	512.387	2M-H	-	1023.77	8	n/a
M1115T48_2	2.22284	0.00038892	0.0021645	0.00280023	0.0078766	1.10727	exp:con	1.13e-08	HMDB0040862	Piceatannol 4'-galloylglucoside	n/a	C27H26O13	558.137	2M-H	-	1115.27	10	n/a
M1115T48_2	2.22284	0.00038892	0.0021645	0.00280023	0.0078766	1.10727	exp:con	1.13e-08	HMDB0150414	6-({7,7'-dihydroxy-5-methoxy-2',2'-dimethyl-2'H,4H-[3,6'-bichromene]-4-yl}oxy)-3,4,5-trihydroxyoxane-2-carboxylic acid	n/a	C27H26O13	558.137	2M-H	-	1115.27	10	n/a
M1115T48_2	2.22284	0.00038892	0.0021645	0.00280023	0.0078766	1.10727	exp:con	1.13e-08	HMDB0147085	6-{[5,12-dihydroxy-3-methoxy-4-(3-methylbut-2-en-1-yl)-9-oxo-8,17-dioxatetracyclo[8.7.0.0²,⁷.0¹¹,¹⁶]heptadeca-1(10),2(7),3,5,11,13,15-heptaen-14-yl]oxy}-3,4,5-trihydroxyoxane-2-carboxylic acid	n/a	C27H26O13	558.137	2M-H	-	1115.27	10	n/a
M1115T48_2	2.22284	0.00038892	0.0021645	0.00280023	0.0078766	1.10727	exp:con	1.13e-08	HMDB0147084	6-{[5,14-dihydroxy-3-methoxy-4-(3-methylbut-2-en-1-yl)-9-oxo-8,17-dioxatetracyclo[8.7.0.0²,⁷.0¹¹,¹⁶]heptadeca-1(10),2(7),3,5,11(16),12,14-heptaen-12-yl]oxy}-3,4,5-trihydroxyoxane-2-carboxylic acid	n/a	C27H26O13	558.137	2M-H	-	1115.27	10	n/a
M1115T48_2	2.22284	0.00038892	0.0021645	0.00280023	0.0078766	1.10727	exp:con	1.13e-08	HMDB0147086	6-{[12,14-dihydroxy-3-methoxy-4-(3-methylbut-2-en-1-yl)-9-oxo-8,17-dioxatetracyclo[8.7.0.0²,⁷.0¹¹,¹⁶]heptadeca-1(10),2(7),3,5,11,13,15-heptaen-5-yl]oxy}-3,4,5-trihydroxyoxane-2-carboxylic acid	n/a	C27H26O13	558.137	2M-H	-	1115.27	10	n/a
M1115T48_2	2.22284	0.00038892	0.0021645	0.00280023	0.0078766	1.10727	exp:con	1.13e-08	HMDB0147083	6-{[14,15-dihydroxy-3-methoxy-4-(3-methylbut-2-en-1-yl)-9-oxo-8,17-dioxatetracyclo[8.7.0.0²,⁷.0¹¹,¹⁶]heptadeca-1(10),2(7),3,5,11(16),12,14-heptaen-5-yl]oxy}-3,4,5-trihydroxyoxane-2-carboxylic acid	n/a	C27H26O13	558.137	2M-H	-	1115.27	10	n/a
M1115T48_2	2.22284	0.00038892	0.0021645	0.00280023	0.0078766	1.10727	exp:con	1.13e-08	HMDB0147081	6-{[5,14-dihydroxy-3-methoxy-4-(3-methylbut-2-en-1-yl)-9-oxo-8,17-dioxatetracyclo[8.7.0.0²,⁷.0¹¹,¹⁶]heptadeca-1(10),2(7),3,5,11(16),12,14-heptaen-15-yl]oxy}-3,4,5-trihydroxyoxane-2-carboxylic acid	n/a	C27H26O13	558.137	2M-H	-	1115.27	10	n/a
M1115T48_2	2.22284	0.00038892	0.0021645	0.00280023	0.0078766	1.10727	exp:con	1.13e-08	HMDB0147082	6-{[5,15-dihydroxy-3-methoxy-4-(3-methylbut-2-en-1-yl)-9-oxo-8,17-dioxatetracyclo[8.7.0.0²,⁷.0¹¹,¹⁶]heptadeca-1(10),2(7),3,5,11(16),12,14-heptaen-14-yl]oxy}-3,4,5-trihydroxyoxane-2-carboxylic acid	n/a	C27H26O13	558.137	2M-H	-	1115.27	10	n/a
M1115T48_2	2.22284	0.00038892	0.0021645	0.00280023	0.0078766	1.10727	exp:con	1.13e-08	HMDB0150413	6-({7,8'-dihydroxy-5-methoxy-2',2'-dimethyl-2'H,4H-[3,6'-bichromene]-4-yl}oxy)-3,4,5-trihydroxyoxane-2-carboxylic acid	n/a	C27H26O13	558.137	2M-H	-	1115.27	10	n/a
M1115T48_2	2.22284	0.00038892	0.0021645	0.00280023	0.0078766	1.10727	exp:con	1.13e-08	HMDB0150415	6-({7',8'-dihydroxy-5-methoxy-2',2'-dimethyl-2'H,4H-[3,6'-bichromene]-4-yl}oxy)-3,4,5-trihydroxyoxane-2-carboxylic acid	n/a	C27H26O13	558.137	2M-H	-	1115.27	10	n/a
M1115T48_2	2.22284	0.00038892	0.0021645	0.00280023	0.0078766	1.10727	exp:con	1.13e-08	HMDB0150417	6-({6,8'-dihydroxy-5-methoxy-2',2'-dimethyl-2'H,4H-[3,6'-bichromene]-4-yl}oxy)-3,4,5-trihydroxyoxane-2-carboxylic acid	n/a	C27H26O13	558.137	2M-H	-	1115.27	10	n/a
M1115T48_2	2.22284	0.00038892	0.0021645	0.00280023	0.0078766	1.10727	exp:con	1.13e-08	HMDB0150416	6-({6,7-dihydroxy-5-methoxy-2',2'-dimethyl-2'H,4H-[3,6'-bichromene]-4-yl}oxy)-3,4,5-trihydroxyoxane-2-carboxylic acid	n/a	C27H26O13	558.137	2M-H	-	1115.27	10	n/a
M1115T48_2	2.22284	0.00038892	0.0021645	0.00280023	0.0078766	1.10727	exp:con	1.13e-08	HMDB0150421	3,4,5-trihydroxy-6-{[10-(7-hydroxy-5-methoxy-4-oxo-4H-chromen-3-yl)-5,5-dimethyl-3,6-dioxatricyclo[5.4.0.0²,⁴]undeca-1(7),8,10-trien-8-yl]oxy}oxane-2-carboxylic acid	n/a	C27H26O13	558.137	2M-H	-	1115.27	10	n/a
M1115T48_2	2.22284	0.00038892	0.0021645	0.00280023	0.0078766	1.10727	exp:con	1.13e-08	HMDB0150423	3,4,5-trihydroxy-6-{[7-hydroxy-2'-(hydroxymethyl)-5-methoxy-2'-methyl-2'H,4H-[3,6'-bichromene]-4-yl]oxy}oxane-2-carboxylic acid	n/a	C27H26O13	558.137	2M-H	-	1115.27	10	n/a
M1115T48_2	2.22284	0.00038892	0.0021645	0.00280023	0.0078766	1.10727	exp:con	1.13e-08	HMDB0150422	3,4,5-trihydroxy-6-[(3-{8-hydroxy-5,5-dimethyl-3,6-dioxatricyclo[5.4.0.0²,⁴]undeca-1(7),8,10-trien-10-yl}-5-methoxy-4-oxo-4H-chromen-7-yl)oxy]oxane-2-carboxylic acid	n/a	C27H26O13	558.137	2M-H	-	1115.27	10	n/a
M1115T48_2	2.22284	0.00038892	0.0021645	0.00280023	0.0078766	1.10727	exp:con	1.13e-08	HMDB0150424	3,4,5-trihydroxy-6-{[8'-hydroxy-2'-(hydroxymethyl)-5-methoxy-2'-methyl-2'H,4H-[3,6'-bichromene]-4-yl]oxy}oxane-2-carboxylic acid	n/a	C27H26O13	558.137	2M-H	-	1115.27	10	n/a
M1115T48_2	2.22284	0.00038892	0.0021645	0.00280023	0.0078766	1.10727	exp:con	1.13e-08	HMDB0169821	{3,4,5-trihydroxy-6-[2,4,6-trihydroxy-3-(4-hydroxy-3-methoxybenzoyl)phenyl]oxan-2-yl}methyl 4-hydroxybenzoate	n/a	C27H26O13	558.137	2M-H	-	1115.27	10	n/a
M1115T48_2	2.22284	0.00038892	0.0021645	0.00280023	0.0078766	1.10727	exp:con	1.13e-08	HMDB0147080	6-({4-[(3,3-dimethyloxiran-2-yl)methyl]-14-hydroxy-3-methoxy-9-oxo-8,17-dioxatetracyclo[8.7.0.0²,⁷.0¹¹,¹⁶]heptadeca-1(10),2(7),3,5,11(16),12,14-heptaen-5-yl}oxy)-3,4,5-trihydroxyoxane-2-carboxylic acid	n/a	C27H26O13	558.137	2M-H	-	1115.27	10	n/a
M1115T48_2	2.22284	0.00038892	0.0021645	0.00280023	0.0078766	1.10727	exp:con	1.13e-08	HMDB0147079	6-({4-[(3,3-dimethyloxiran-2-yl)methyl]-5-hydroxy-3-methoxy-9-oxo-8,17-dioxatetracyclo[8.7.0.0²,⁷.0¹¹,¹⁶]heptadeca-1(10),2(7),3,5,11(16),12,14-heptaen-14-yl}oxy)-3,4,5-trihydroxyoxane-2-carboxylic acid	n/a	C27H26O13	558.137	2M-H	-	1115.27	10	n/a
M1115T48_2	2.22284	0.00038892	0.0021645	0.00280023	0.0078766	1.10727	exp:con	1.13e-08	HMDB0147073	6-{[5,14-dihydroxy-3-methoxy-4-(3-methylbut-2-en-1-yl)-9-oxo-8,17-dioxatetracyclo[8.7.0.0²,⁷.0¹¹,¹⁶]heptadeca-1(10),2(7),3,5,11,13,15-heptaen-13-yl]oxy}-3,4,5-trihydroxyoxane-2-carboxylic acid	n/a	C27H26O13	558.137	2M-H	-	1115.27	10	n/a
M1115T48_2	2.22284	0.00038892	0.0021645	0.00280023	0.0078766	1.10727	exp:con	1.13e-08	HMDB0147074	6-{[5,13-dihydroxy-3-methoxy-4-(3-methylbut-2-en-1-yl)-9-oxo-8,17-dioxatetracyclo[8.7.0.0²,⁷.0¹¹,¹⁶]heptadeca-1(10),2(7),3,5,11,13,15-heptaen-14-yl]oxy}-3,4,5-trihydroxyoxane-2-carboxylic acid	n/a	C27H26O13	558.137	2M-H	-	1115.27	10	n/a
M1115T48_2	2.22284	0.00038892	0.0021645	0.00280023	0.0078766	1.10727	exp:con	1.13e-08	HMDB0147077	3,4,5-trihydroxy-6-{[14-hydroxy-4-(4-hydroxy-3-methylbut-2-en-1-yl)-3-methoxy-9-oxo-8,17-dioxatetracyclo[8.7.0.0²,⁷.0¹¹,¹⁶]heptadeca-1(10),2(7),3,5,11(16),12,14-heptaen-5-yl]oxy}oxane-2-carboxylic acid	n/a	C27H26O13	558.137	2M-H	-	1115.27	10	n/a
M1115T48_2	2.22284	0.00038892	0.0021645	0.00280023	0.0078766	1.10727	exp:con	1.13e-08	HMDB0147076	3,4,5-trihydroxy-6-{[5-hydroxy-4-(4-hydroxy-3-methylbut-2-en-1-yl)-3-methoxy-9-oxo-8,17-dioxatetracyclo[8.7.0.0²,⁷.0¹¹,¹⁶]heptadeca-1(10),2(7),3,5,11(16),12,14-heptaen-14-yl]oxy}oxane-2-carboxylic acid	n/a	C27H26O13	558.137	2M-H	-	1115.27	10	n/a
M1115T48_2	2.22284	0.00038892	0.0021645	0.00280023	0.0078766	1.10727	exp:con	1.13e-08	HMDB0147075	6-{[13,14-dihydroxy-3-methoxy-4-(3-methylbut-2-en-1-yl)-9-oxo-8,17-dioxatetracyclo[8.7.0.0²,⁷.0¹¹,¹⁶]heptadeca-1(10),2(7),3,5,11(16),12,14-heptaen-5-yl]oxy}-3,4,5-trihydroxyoxane-2-carboxylic acid	n/a	C27H26O13	558.137	2M-H	-	1115.27	10	n/a
M1115T48_2	2.22284	0.00038892	0.0021645	0.00280023	0.0078766	1.10727	exp:con	1.13e-08	HMDB0170024	4,5-dihydroxy-6-(hydroxymethyl)-2-[2,4,6-trihydroxy-3-(4-hydroxy-3-methoxybenzoyl)phenyl]oxan-3-yl 4-hydroxybenzoate	n/a	C27H26O13	558.137	2M-H	-	1115.27	10	n/a
M231T55_2	3.49523	9.96e-06	0.0021645	0.000302504	0.0078766	1.58812	exp:con	1.59e-11	HMDB0029720	2-Thiophenethiol	n/a	C4H4S2	115.975	2M-H	-	230.944	4	n/a
M257T172	0.490395	3.09e-06	0.0021645	0.000158701	0.0078766	1.00637	exp:con	0.0381046	HMDB0167315	SCHEMBL1023998	n/a	C5H7NOS	129.025	2M-H	-	257.042	9	n/a
M257T172	0.490395	3.09e-06	0.0021645	0.000158701	0.0078766	1.00637	exp:con	0.0381046	HMDB0167316	2-(2-isothiocyanatoethyl)oxirane	n/a	C5H7NOS	129.025	2M-H	-	257.042	9	n/a
M257T172	0.490395	3.09e-06	0.0021645	0.000158701	0.0078766	1.00637	exp:con	0.0381046	HMDB0033561	2-Acetyl-4,5-dihydrothiazole	n/a	C5H7NOS	129.025	2M-H	-	257.042	9	n/a
M257T172	0.490395	3.09e-06	0.0021645	0.000158701	0.0078766	1.00637	exp:con	0.0381046	HMDB0037178	5-Methoxy-2-methylthiazole	n/a	C5H7NOS	129.025	2M-H	-	257.042	9	n/a
M257T172	0.490395	3.09e-06	0.0021645	0.000158701	0.0078766	1.00637	exp:con	0.0381046	HMDB0041282	2-Ethoxythiazole	n/a	C5H7NOS	129.025	2M-H	-	257.042	9	n/a
M297T153	12.5545	0.000274072	0.0021645	0.00221583	0.0078766	2.35929	exp:con	0.025845	HMDB0011600	3-Methyladenine	C00913	C6H7N5	149.07	2M-H	-	297.133	2	n/a
M297T153	12.5545	0.000274072	0.0021645	0.00221583	0.0078766	2.35929	exp:con	0.025845	HMDB0011614	7-Methyladenine	C02241	C6H7N5	149.07	2M-H	-	297.133	2	n/a
M297T153	12.5545	0.000274072	0.0021645	0.00221583	0.0078766	2.35929	exp:con	0.025845	HMDB0011599	1-Methyladenine	C02216	C6H7N5	149.07	2M-H	-	297.133	2	n/a
M297T153	12.5545	0.000274072	0.0021645	0.00221583	0.0078766	2.35929	exp:con	0.025845	HMDB0002099	6-Methyladenine	C08434	C6H7N5	149.07	2M-H	-	297.133	2	n/a
M305T56	2.09003	0.00014698	0.0021645	0.00149501	0.0078766	1.24005	exp:con	0.294351	HMDB0003585	Thiocysteine	C01962	C3H7NO2S2	152.992	2M-H	-	304.976	10	map00270 Cysteine and methionine metabolism;
M339T482	0.36455	0.00195287	0.0021645	0.00848125	0.0078766	1.57695	exp:con	0.151463	HMDB0001112	Glyceraldehyde 3-phosphate	C00661	C3H7O6P	169.998	2M-H	-	338.989	0	n/a
M339T482	0.36455	0.00195287	0.0021645	0.00848125	0.0078766	1.57695	exp:con	0.151463	HMDB0001473	Dihydroxyacetone phosphate	C00111	C3H7O6P	169.998	2M-H	-	338.989	0	map00010 Glycolysis / Gluconeogenesis;map00040 Pentose and glucuronate interconversions;map00051 Fructose and mannose metabolism;map00052 Galactose metabolism;map00561 Glycerolipid metabolism;map00562 Inositol phosphate metabolism;map00564 Glycerophospholipid metabolism;map00640 Propanoate metabolism;map00680 Methane metabolism;map00710 Carbon fixation in photosynthetic organisms;map00760 Nicotin…
M339T482	0.36455	0.00195287	0.0021645	0.00848125	0.0078766	1.57695	exp:con	0.151463	HMDB0156243	phospholactic acid	n/a	C3H7O6P	169.998	2M-H	-	338.989	0	n/a
M341T185	0.263806	0.00337621	0.00865801	0.0124999	0.0233787	1.53439	exp:con	0.155255	HMDB0032420	2-(4-Methyl-5-thiazolyl)ethyl formate	n/a	C7H9NO2S	171.035	2M-H	-	341.064	9	n/a
M387T68	2.44996	0.00254073	0.00865801	0.0102689	0.0233787	1.17836	exp:con	3e-11	HMDB0014991	Temozolomide	n/a	C6H6N6O2	194.055	2M-H	-	387.103	6	n/a
M387T68	2.44996	0.00254073	0.00865801	0.0102689	0.0233787	1.17836	exp:con	3e-11	HMDB0142175	2-benzylpropanedioic acid	n/a	C10H10O4	194.058	2M-H	-	387.109	8	n/a
M387T68	2.44996	0.00254073	0.00865801	0.0102689	0.0233787	1.17836	exp:con	3e-11	HMDB0146403	SCHEMBL2535852	n/a	C10H10O4	194.058	2M-H	-	387.109	8	n/a
M387T68	2.44996	0.00254073	0.00865801	0.0102689	0.0233787	1.17836	exp:con	3e-11	HMDB0146630	3-(2-methoxyphenyl)oxirane-2-carboxylic acid	n/a	C10H10O4	194.058	2M-H	-	387.109	8	n/a
M387T68	2.44996	0.00254073	0.00865801	0.0102689	0.0233787	1.17836	exp:con	3e-11	HMDB0146628	ZINC222502827	n/a	C10H10O4	194.058	2M-H	-	387.109	8	n/a
M387T68	2.44996	0.00254073	0.00865801	0.0102689	0.0233787	1.17836	exp:con	3e-11	HMDB0146629	CTK4I0057	n/a	C10H10O4	194.058	2M-H	-	387.109	8	n/a
M387T68	2.44996	0.00254073	0.00865801	0.0102689	0.0233787	1.17836	exp:con	3e-11	HMDB0154365	3-(3-hydroxy-2-methoxyphenyl)prop-2-enoic acid	n/a	C10H10O4	194.058	2M-H	-	387.109	8	n/a
M387T68	2.44996	0.00254073	0.00865801	0.0102689	0.0233787	1.17836	exp:con	3e-11	HMDB0166608	3-(6-hydroxy-2H-1,3-benzodioxol-5-yl)propanal	n/a	C10H10O4	194.058	2M-H	-	387.109	8	n/a
M387T68	2.44996	0.00254073	0.00865801	0.0102689	0.0233787	1.17836	exp:con	3e-11	HMDB0166607	3-(2H-1,3-benzodioxol-5-yl)-3-hydroxypropanal	n/a	C10H10O4	194.058	2M-H	-	387.109	8	n/a
M387T68	2.44996	0.00254073	0.00865801	0.0102689	0.0233787	1.17836	exp:con	3e-11	HMDB0166611	3-(2H-1,3-benzodioxol-5-yl)-2-hydroxypropanal	n/a	C10H10O4	194.058	2M-H	-	387.109	8	n/a
M387T68	2.44996	0.00254073	0.00865801	0.0102689	0.0233787	1.17836	exp:con	3e-11	HMDB0166609	2815-95-4	n/a	C10H10O4	194.058	2M-H	-	387.109	8	n/a
M387T68	2.44996	0.00254073	0.00865801	0.0102689	0.0233787	1.17836	exp:con	3e-11	HMDB0166614	[3-(2H-1,3-benzodioxol-5-yl)oxiran-2-yl]methanol	n/a	C10H10O4	194.058	2M-H	-	387.109	8	n/a
M387T68	2.44996	0.00254073	0.00865801	0.0102689	0.0233787	1.17836	exp:con	3e-11	HMDB0166613	6-[(1Z)-3-hydroxyprop-1-en-1-yl]-2H-1,3-benzodioxol-5-ol	n/a	C10H10O4	194.058	2M-H	-	387.109	8	n/a
M387T68	2.44996	0.00254073	0.00865801	0.0102689	0.0233787	1.17836	exp:con	3e-11	HMDB0141265	3-(3-methoxyphenyl)-2-oxopropanoic acid	n/a	C10H10O4	194.058	2M-H	-	387.109	8	n/a
M387T68	2.44996	0.00254073	0.00865801	0.0102689	0.0233787	1.17836	exp:con	3e-11	HMDB0141263	(2Z)-2-hydroxy-3-(3-methoxyphenyl)prop-2-enoic acid	n/a	C10H10O4	194.058	2M-H	-	387.109	8	n/a
M387T68	2.44996	0.00254073	0.00865801	0.0102689	0.0233787	1.17836	exp:con	3e-11	HMDB0140957	(2E)-3-(3-hydroxy-2-methoxyphenyl)prop-2-enoic acid	n/a	C10H10O4	194.058	2M-H	-	387.109	8	n/a
M387T68	2.44996	0.00254073	0.00865801	0.0102689	0.0233787	1.17836	exp:con	3e-11	HMDB0125096	3-(4-hydroxy-3-methoxyphenyl)prop-2-enoic acid	n/a	C10H10O4	194.058	2M-H	-	387.109	8	n/a
M387T68	2.44996	0.00254073	0.00865801	0.0102689	0.0233787	1.17836	exp:con	3e-11	HMDB0125524	(2E)-3-(3-hydroxy-5-methoxyphenyl)prop-2-enoic acid	n/a	C10H10O4	194.058	2M-H	-	387.109	8	n/a
M387T68	2.44996	0.00254073	0.00865801	0.0102689	0.0233787	1.17836	exp:con	3e-11	HMDB0125588	3-(3-hydroxy-5-methoxyphenyl)prop-2-enoic acid	n/a	C10H10O4	194.058	2M-H	-	387.109	8	n/a
M387T68	2.44996	0.00254073	0.00865801	0.0102689	0.0233787	1.17836	exp:con	3e-11	HMDB0127500	3-(4-methoxyphenyl)-2-oxopropanoic acid	n/a	C10H10O4	194.058	2M-H	-	387.109	8	n/a
M387T68	2.44996	0.00254073	0.00865801	0.0102689	0.0233787	1.17836	exp:con	3e-11	HMDB0131137	3-(3-hydroxy-4-methoxyphenyl)prop-2-enoic acid	n/a	C10H10O4	194.058	2M-H	-	387.109	8	n/a
M387T68	2.44996	0.00254073	0.00865801	0.0102689	0.0233787	1.17836	exp:con	3e-11	HMDB0131172	(2E)-3-(2-hydroxy-4-methoxyphenyl)prop-2-enoic acid	n/a	C10H10O4	194.058	2M-H	-	387.109	8	n/a
M387T68	2.44996	0.00254073	0.00865801	0.0102689	0.0233787	1.17836	exp:con	3e-11	HMDB0131171	(2Z)-2-hydroxy-3-(4-methoxyphenyl)prop-2-enoic acid	n/a	C10H10O4	194.058	2M-H	-	387.109	8	n/a
M387T68	2.44996	0.00254073	0.00865801	0.0102689	0.0233787	1.17836	exp:con	3e-11	HMDB0131173	3-(4-methoxyphenyl)oxirane-2-carboxylic acid	n/a	C10H10O4	194.058	2M-H	-	387.109	8	n/a
M387T68	2.44996	0.00254073	0.00865801	0.0102689	0.0233787	1.17836	exp:con	3e-11	HMDB0137510	3-(4-hydroxy-2-methoxyphenyl)prop-2-enoic acid	n/a	C10H10O4	194.058	2M-H	-	387.109	8	n/a
M387T68	2.44996	0.00254073	0.00865801	0.0102689	0.0233787	1.17836	exp:con	3e-11	HMDB0178262	(2Z)-3-(3-hydroxy-5-methoxyphenyl)prop-2-enoic acid	n/a	C10H10O4	194.058	2M-H	-	387.109	8	n/a
M387T68	2.44996	0.00254073	0.00865801	0.0102689	0.0233787	1.17836	exp:con	3e-11	HMDB0000954	Ferulic acid	C01494	C10H10O4	194.058	2M-H	-	387.109	8	map00940 Phenylpropanoid biosynthesis;map01061 Biosynthesis of phenylpropanoids;map01100 Metabolic pathways;map01110 Biosynthesis of secondary metabolites;
M387T68	2.44996	0.00254073	0.00865801	0.0102689	0.0233787	1.17836	exp:con	3e-11	HMDB0135741	3-(2-hydroxy-4-methoxyphenyl)prop-2-enoic acid	n/a	C10H10O4	194.058	2M-H	-	387.109	8	n/a
M387T68	2.44996	0.00254073	0.00865801	0.0102689	0.0233787	1.17836	exp:con	3e-11	HMDB0061686	2,5-Dihydroxycinnamic acid methyl ester	n/a	C10H10O4	194.058	2M-H	-	387.109	8	n/a
M387T68	2.44996	0.00254073	0.00865801	0.0102689	0.0233787	1.17836	exp:con	3e-11	HMDB0000955	Isoferulic acid	C10470	C10H10O4	194.058	2M-H	-	387.109	8	n/a
M387T68	2.44996	0.00254073	0.00865801	0.0102689	0.0233787	1.17836	exp:con	3e-11	HMDB0002120	Monoethyl phthalate	n/a	C10H10O4	194.058	2M-H	-	387.109	8	n/a
M387T68	2.44996	0.00254073	0.00865801	0.0102689	0.0233787	1.17836	exp:con	3e-11	HMDB0030765	(-)-trans-3,4-Dihydro-4,8-dihydroxy-3-methyl-1H-2-benzopyran-1-one	n/a	C10H10O4	194.058	2M-H	-	387.109	8	n/a
M387T68	2.44996	0.00254073	0.00865801	0.0102689	0.0233787	1.17836	exp:con	3e-11	HMDB0039606	Repandiol	n/a	C10H10O4	194.058	2M-H	-	387.109	8	n/a
M387T68	2.44996	0.00254073	0.00865801	0.0102689	0.0233787	1.17836	exp:con	3e-11	HMDB0032652	Meconine	n/a	C10H10O4	194.058	2M-H	-	387.109	8	n/a
M387T68	2.44996	0.00254073	0.00865801	0.0102689	0.0233787	1.17836	exp:con	3e-11	HMDB0037644	3-(2-Hydroxy-3-methoxyphenyl)-2-propenoic acid	n/a	C10H10O4	194.058	2M-H	-	387.109	8	n/a
M387T68	2.44996	0.00254073	0.00865801	0.0102689	0.0233787	1.17836	exp:con	3e-11	HMDB0029663	Vanillin acetate	n/a	C10H10O4	194.058	2M-H	-	387.109	8	n/a
M387T68	2.44996	0.00254073	0.00865801	0.0102689	0.0233787	1.17836	exp:con	3e-11	HMDB0032614	Piperonyl acetate	n/a	C10H10O4	194.058	2M-H	-	387.109	8	n/a
M387T68	2.44996	0.00254073	0.00865801	0.0102689	0.0233787	1.17836	exp:con	3e-11	HMDB0165533	Ferulic acid	n/a	C10H10O4	194.058	2M-H	-	387.109	8	n/a
M387T68	2.44996	0.00254073	0.00865801	0.0102689	0.0233787	1.17836	exp:con	3e-11	HMDB0059721	mono-Benzyl malonate	n/a	C10H10O4	194.058	2M-H	-	387.109	8	n/a
M387T68	2.44996	0.00254073	0.00865801	0.0102689	0.0233787	1.17836	exp:con	3e-11	HMDB0134088	3-(2-hydroxy-3-methoxyphenyl)prop-2-enoic acid	n/a	C10H10O4	194.058	2M-H	-	387.109	8	n/a
M391T366	0.212789	0.00591183	0.025974	0.0189118	0.0560999	1.78656	exp:con	0.112158	HMDB0169507	CHEMBL505640	n/a	C10H12O4	196.074	2M-H	-	391.14	6	n/a
M391T366	0.212789	0.00591183	0.025974	0.0189118	0.0560999	1.78656	exp:con	0.112158	HMDB0131138	3-(3-hydroxy-4-methoxyphenyl)propanoic acid	n/a	C10H12O4	196.074	2M-H	-	391.14	6	n/a
M391T366	0.212789	0.00591183	0.025974	0.0189118	0.0560999	1.78656	exp:con	0.112158	HMDB0169508	1-(2,4-dihydroxy-6-methoxy-3-methylphenyl)ethan-1-one	n/a	C10H12O4	196.074	2M-H	-	391.14	6	n/a
M391T366	0.212789	0.00591183	0.025974	0.0189118	0.0560999	1.78656	exp:con	0.112158	HMDB0131427	2-(3,5-dimethoxyphenyl)acetic acid	n/a	C10H12O4	196.074	2M-H	-	391.14	6	n/a
M391T366	0.212789	0.00591183	0.025974	0.0189118	0.0560999	1.78656	exp:con	0.112158	HMDB0133490	3-hydroxy-3-(3-methoxyphenyl)propanoic acid	n/a	C10H12O4	196.074	2M-H	-	391.14	6	n/a
M391T366	0.212789	0.00591183	0.025974	0.0189118	0.0560999	1.78656	exp:con	0.112158	HMDB0133530	2-hydroxy-3-(3-methoxyphenyl)propanoic acid	n/a	C10H12O4	196.074	2M-H	-	391.14	6	n/a
M391T366	0.212789	0.00591183	0.025974	0.0189118	0.0560999	1.78656	exp:con	0.112158	HMDB0133782	2-(2-hydroxy-4-methoxyphenyl)propanoic acid	n/a	C10H12O4	196.074	2M-H	-	391.14	6	n/a
M391T366	0.212789	0.00591183	0.025974	0.0189118	0.0560999	1.78656	exp:con	0.112158	HMDB0134100	3-(2-hydroxy-3-methoxyphenyl)propanoic acid	n/a	C10H12O4	196.074	2M-H	-	391.14	6	n/a
M391T366	0.212789	0.00591183	0.025974	0.0189118	0.0560999	1.78656	exp:con	0.112158	HMDB0135753	4-ethenyl-2,6-dimethoxybenzene-1,3-diol	n/a	C10H12O4	196.074	2M-H	-	391.14	6	n/a
M391T366	0.212789	0.00591183	0.025974	0.0189118	0.0560999	1.78656	exp:con	0.112158	HMDB0140293	3-hydroxy-3-(4-methoxyphenyl)propanoic acid	n/a	C10H12O4	196.074	2M-H	-	391.14	6	n/a
M391T366	0.212789	0.00591183	0.025974	0.0189118	0.0560999	1.78656	exp:con	0.112158	HMDB0140897	3-(3-hydroxy-2-methoxyphenyl)propanoic acid	n/a	C10H12O4	196.074	2M-H	-	391.14	6	n/a
M391T366	0.212789	0.00591183	0.025974	0.0189118	0.0560999	1.78656	exp:con	0.112158	HMDB0146633	AKOS024163440	n/a	C10H12O4	196.074	2M-H	-	391.14	6	n/a
M391T366	0.212789	0.00591183	0.025974	0.0189118	0.0560999	1.78656	exp:con	0.112158	HMDB0146636	3-(4-hydroxy-2-methoxyphenyl)propanoic acid	n/a	C10H12O4	196.074	2M-H	-	391.14	6	n/a
M391T366	0.212789	0.00591183	0.025974	0.0189118	0.0560999	1.78656	exp:con	0.112158	HMDB0166066	(4-methoxyphenyl)methyl 2-hydroxyacetate	n/a	C10H12O4	196.074	2M-H	-	391.14	6	n/a
M391T366	0.212789	0.00591183	0.025974	0.0189118	0.0560999	1.78656	exp:con	0.112158	HMDB0177595	AKOS015328590	n/a	C10H12O4	196.074	2M-H	-	391.14	6	n/a
M391T366	0.212789	0.00591183	0.025974	0.0189118	0.0560999	1.78656	exp:con	0.112158	HMDB0130895	2-(4-hydroxy-3-methoxyphenyl)propanoic acid	n/a	C10H12O4	196.074	2M-H	-	391.14	6	n/a
M391T366	0.212789	0.00591183	0.025974	0.0189118	0.0560999	1.78656	exp:con	0.112158	HMDB0129339	2-(3-hydroxy-4-methoxyphenyl)propanoic acid	n/a	C10H12O4	196.074	2M-H	-	391.14	6	n/a
M391T366	0.212789	0.00591183	0.025974	0.0189118	0.0560999	1.78656	exp:con	0.112158	HMDB0131175	3-(2-hydroxy-4-methoxyphenyl)propanoic acid	n/a	C10H12O4	196.074	2M-H	-	391.14	6	n/a
M391T366	0.212789	0.00591183	0.025974	0.0189118	0.0560999	1.78656	exp:con	0.112158	HMDB0125530	3-(3-hydroxy-5-methoxyphenyl)propanoic acid	n/a	C10H12O4	196.074	2M-H	-	391.14	6	n/a
M391T366	0.212789	0.00591183	0.025974	0.0189118	0.0560999	1.78656	exp:con	0.112158	HMDB0000434	Homoveratric acid	n/a	C10H12O4	196.074	2M-H	-	391.14	6	n/a
M391T366	0.212789	0.00591183	0.025974	0.0189118	0.0560999	1.78656	exp:con	0.112158	HMDB0060735	3-(3,4-Dihydroxyphenyl)-2-methylpropionic acid	n/a	C10H12O4	196.074	2M-H	-	391.14	6	n/a
M391T366	0.212789	0.00591183	0.025974	0.0189118	0.0560999	1.78656	exp:con	0.112158	HMDB0060733	3-(3-Hydroxyphenyl)-2-methyllactic acid	n/a	C10H12O4	196.074	2M-H	-	391.14	6	n/a
M391T366	0.212789	0.00591183	0.025974	0.0189118	0.0560999	1.78656	exp:con	0.112158	HMDB0060398	5-Hydroxyconiferyl alcohol	C12205	C10H12O4	196.074	2M-H	-	391.14	6	map00940 Phenylpropanoid biosynthesis;map01110 Biosynthesis of secondary metabolites;
M391T366	0.212789	0.00591183	0.025974	0.0189118	0.0560999	1.78656	exp:con	0.112158	HMDB0062121	Dihydroferulic acid	n/a	C10H12O4	196.074	2M-H	-	391.14	6	n/a
M391T366	0.212789	0.00591183	0.025974	0.0189118	0.0560999	1.78656	exp:con	0.112158	HMDB0040256	(S)-2-(4-Methoxyphenoxy)propanoic acid	n/a	C10H12O4	196.074	2M-H	-	391.14	6	n/a
M391T366	0.212789	0.00591183	0.025974	0.0189118	0.0560999	1.78656	exp:con	0.112158	HMDB0035721	(S)-Batatic acid	n/a	C10H12O4	196.074	2M-H	-	391.14	6	n/a
M391T366	0.212789	0.00591183	0.025974	0.0189118	0.0560999	1.78656	exp:con	0.112158	HMDB0030571	(+)-3-(3,4-Methylenedioxyphenyl)-1,2-propanediol	n/a	C10H12O4	196.074	2M-H	-	391.14	6	n/a
M391T366	0.212789	0.00591183	0.025974	0.0189118	0.0560999	1.78656	exp:con	0.112158	HMDB0029648	2,4,5-Trimethoxybenzaldehyde	n/a	C10H12O4	196.074	2M-H	-	391.14	6	n/a
M391T366	0.212789	0.00591183	0.025974	0.0189118	0.0560999	1.78656	exp:con	0.112158	HMDB0037177	1-(2,4,5-Trihydroxyphenyl)-1-butanone	n/a	C10H12O4	196.074	2M-H	-	391.14	6	n/a
M391T366	0.212789	0.00591183	0.025974	0.0189118	0.0560999	1.78656	exp:con	0.112158	HMDB0029645	Xanthoxylin	C10726	C10H12O4	196.074	2M-H	-	391.14	6	n/a
M391T366	0.212789	0.00591183	0.025974	0.0189118	0.0560999	1.78656	exp:con	0.112158	HMDB0039427	2-Hydroxy-3-(4-methoxyphenyl)propanoic acid	n/a	C10H12O4	196.074	2M-H	-	391.14	6	n/a
M391T366	0.212789	0.00591183	0.025974	0.0189118	0.0560999	1.78656	exp:con	0.112158	HMDB0040637	4-Hydroxy-6-methyl-3-(1-oxobutyl)-2H-pyran-2-one	n/a	C10H12O4	196.074	2M-H	-	391.14	6	n/a
M391T366	0.212789	0.00591183	0.025974	0.0189118	0.0560999	1.78656	exp:con	0.112158	HMDB0032365	Maltyl isobutyrate	n/a	C10H12O4	196.074	2M-H	-	391.14	6	n/a
M391T366	0.212789	0.00591183	0.025974	0.0189118	0.0560999	1.78656	exp:con	0.112158	HMDB0061008	m-chlorophenylpiperazine (m-CPP)	C11738	C10H13ClN2	196.077	2M-H	-	391.146	10	n/a
M395T200	3.42031	0.00539108	0.0021645	0.0176378	0.0078766	1.43502	exp:con	5.95e-10	HMDB0163239	(2E,5Z)-11-hydroxyundeca-2,5-dienoic acid	n/a	C11H18O3	198.126	2M-H	-	395.244	3	n/a
M395T200	3.42031	0.00539108	0.0021645	0.0176378	0.0078766	1.43502	exp:con	5.95e-10	HMDB0163242	3-[(2Z)-oct-2-en-1-yl]oxirane-2-carboxylic acid	n/a	C11H18O3	198.126	2M-H	-	395.244	3	n/a
M395T200	3.42031	0.00539108	0.0021645	0.0176378	0.0078766	1.43502	exp:con	5.95e-10	HMDB0163243	(2E)-4-(3-pentyloxiran-2-yl)but-2-enoic acid	n/a	C11H18O3	198.126	2M-H	-	395.244	3	n/a
M395T200	3.42031	0.00539108	0.0021645	0.0176378	0.0078766	1.43502	exp:con	5.95e-10	HMDB0178762	methyl (4Z,8Z)-7-hydroxydeca-4,8-dienoate	n/a	C11H18O3	198.126	2M-H	-	395.244	3	n/a
M395T200	3.42031	0.00539108	0.0021645	0.0176378	0.0078766	1.43502	exp:con	5.95e-10	HMDB0178764	methyl (4Z,8Z)-3-hydroxydeca-4,8-dienoate	n/a	C11H18O3	198.126	2M-H	-	395.244	3	n/a
M395T200	3.42031	0.00539108	0.0021645	0.0176378	0.0078766	1.43502	exp:con	5.95e-10	HMDB0178766	methyl (4Z)-7-(3-methyloxiran-2-yl)hept-4-enoate	n/a	C11H18O3	198.126	2M-H	-	395.244	3	n/a
M395T200	3.42031	0.00539108	0.0021645	0.0176378	0.0078766	1.43502	exp:con	5.95e-10	HMDB0178765	methyl (4Z,8Z)-6-hydroxydeca-4,8-dienoate	n/a	C11H18O3	198.126	2M-H	-	395.244	3	n/a
M395T200	3.42031	0.00539108	0.0021645	0.0176378	0.0078766	1.43502	exp:con	5.95e-10	HMDB0178763	methyl (4Z,8Z)-10-hydroxydeca-4,8-dienoate	n/a	C11H18O3	198.126	2M-H	-	395.244	3	n/a
M395T200	3.42031	0.00539108	0.0021645	0.0176378	0.0078766	1.43502	exp:con	5.95e-10	HMDB0178767	methyl 3-{3-[(3Z)-pent-3-en-1-yl]oxiran-2-yl}propanoate	n/a	C11H18O3	198.126	2M-H	-	395.244	3	n/a
M395T200	3.42031	0.00539108	0.0021645	0.0176378	0.0078766	1.43502	exp:con	5.95e-10	HMDB0178768	methyl (4Z,8Z)-2-hydroxydeca-4,8-dienoate	n/a	C11H18O3	198.126	2M-H	-	395.244	3	n/a
M395T200	3.42031	0.00539108	0.0021645	0.0176378	0.0078766	1.43502	exp:con	5.95e-10	HMDB0179397	methyl 3-[(1Z)-hept-1-en-1-yl]oxirane-2-carboxylate	n/a	C11H18O3	198.126	2M-H	-	395.244	3	n/a
M395T200	3.42031	0.00539108	0.0021645	0.0176378	0.0078766	1.43502	exp:con	5.95e-10	HMDB0179396	methyl (2E,4Z)-9-hydroxydeca-2,4-dienoate	n/a	C11H18O3	198.126	2M-H	-	395.244	3	n/a
M395T200	3.42031	0.00539108	0.0021645	0.0176378	0.0078766	1.43502	exp:con	5.95e-10	HMDB0179395	methyl (4Z)-6-hydroxydeca-2,4-dienoate	n/a	C11H18O3	198.126	2M-H	-	395.244	3	n/a
M395T200	3.42031	0.00539108	0.0021645	0.0176378	0.0078766	1.43502	exp:con	5.95e-10	HMDB0179398	methyl (2E)-3-(3-pentyloxiran-2-yl)prop-2-enoate	n/a	C11H18O3	198.126	2M-H	-	395.244	3	n/a
M395T200	3.42031	0.00539108	0.0021645	0.0176378	0.0078766	1.43502	exp:con	5.95e-10	HMDB0163241	(2E,5Z)-7-hydroxyundeca-2,5-dienoic acid	n/a	C11H18O3	198.126	2M-H	-	395.244	3	n/a
M395T200	3.42031	0.00539108	0.0021645	0.0176378	0.0078766	1.43502	exp:con	5.95e-10	HMDB0163238	(2E,5Z)-10-hydroxyundeca-2,5-dienoic acid	n/a	C11H18O3	198.126	2M-H	-	395.244	3	n/a
M395T200	3.42031	0.00539108	0.0021645	0.0176378	0.0078766	1.43502	exp:con	5.95e-10	HMDB0179399	methyl (2E,4Z)-10-hydroxydeca-2,4-dienoate	n/a	C11H18O3	198.126	2M-H	-	395.244	3	n/a
M429T103	2.78739	0.00212919	0.0021645	0.00904054	0.0078766	1.55526	exp:con	0.0479458	HMDB0001885	3-Chlorotyrosine	n/a	C9H10ClNO3	215.035	2M-H	-	429.063	2	n/a
M435T138	20.313	1.16e-07	0.0021645	2.34e-05	0.0078766	2.78018	exp:con	0.0330905	HMDB0034007	(E,E)-1-Chloro-3,11-tridecadiene-5,7,9-triyn-2-ol	n/a	C13H11ClO	218.05	2M-H	-	435.092	2	n/a
M435T138	20.313	1.16e-07	0.0021645	2.34e-05	0.0078766	2.78018	exp:con	0.0330905	HMDB0038463	3-(Isothiocyanatomethyl)-1-methoxy-1H-indole	n/a	C11H10N2OS	218.051	2M-H	-	435.095	9	n/a
M447T136	35.881	2.02e-11	0.0021645	1.02e-07	0.0078766	2.97652	exp:con	0.0353711	HMDB0151306	(2E)-2-(methanesulfinylmethyl)-3-phenylprop-2-enoic acid	n/a	C11H12O3S	224.051	2M-H	-	447.094	5	n/a
M447T136	35.881	2.02e-11	0.0021645	1.02e-07	0.0078766	2.97652	exp:con	0.0353711	HMDB0151305	(2E)-3-(4-hydroxyphenyl)-2-[(methylsulfanyl)methyl]prop-2-enoic acid	n/a	C11H12O3S	224.051	2M-H	-	447.094	5	n/a
M447T136	35.881	2.02e-11	0.0021645	1.02e-07	0.0078766	2.97652	exp:con	0.0353711	HMDB0151304	(2E)-3-(3-hydroxyphenyl)-2-[(methylsulfanyl)methyl]prop-2-enoic acid	n/a	C11H12O3S	224.051	2M-H	-	447.094	5	n/a
M447T136	35.881	2.02e-11	0.0021645	1.02e-07	0.0078766	2.97652	exp:con	0.0353711	HMDB0151308	(2E)-3-(2-hydroxyphenyl)-2-[(methylsulfanyl)methyl]prop-2-enoic acid	n/a	C11H12O3S	224.051	2M-H	-	447.094	5	n/a
M447T136	35.881	2.02e-11	0.0021645	1.02e-07	0.0078766	2.97652	exp:con	0.0353711	HMDB0151307	2-[(methylsulfanyl)methyl]-3-phenyloxirane-2-carboxylic acid	n/a	C11H12O3S	224.051	2M-H	-	447.094	5	n/a
M489T210	2.9951	0.00171759	0.0021645	0.00776381	0.0078766	1.5263	exp:con	0.0234253	HMDB0015153	Guanfacine	C07037	C9H9Cl2N3O	245.012	2M-H	-	489.017	1	n/a
M489T210	2.9951	0.00171759	0.0021645	0.00776381	0.0078766	1.5263	exp:con	0.0234253	HMDB0060555	4-Hydroxyclonidine	n/a	C9H9Cl2N3O	245.012	2M-H	-	489.017	1	n/a
M525T62_2	2.17186	0.000363153	0.0021645	0.00267978	0.0078766	1.32683	exp:con	0.0757625	HMDB0029944	Ascorbalamic acid	n/a	C9H13NO8	263.064	2M-H	-	525.121	10	n/a
M547T229	6.04813	7.59e-05	0.0021645	0.00096878	0.0078766	1.83824	exp:con	0.114728	HMDB0165617	3,4,5-trihydroxy-6-{[(2Z)-2-methylpenta-2,4-dien-1-yl]oxy}oxane-2-carboxylic acid	n/a	C12H18O7	274.105	2M-H	-	547.203	9	n/a
M547T229	6.04813	7.59e-05	0.0021645	0.00096878	0.0078766	1.83824	exp:con	0.114728	HMDB0179353	6-[(2Z,4E)-hexa-2,4-dien-1-yloxy]-3,4,5-trihydroxyoxane-2-carboxylic acid	n/a	C12H18O7	274.105	2M-H	-	547.203	9	n/a
M203T137	0.452392	0.00944942	0.004329	0.0268523	0.0134018	1.09955	exp:con	3.84e-12	HMDB0000289	Uric acid	C00366	C5H4N4O3	168.028	M+Cl	-	202.998	5	map00230 Purine metabolism;map01100 Metabolic pathways;map01120 Microbial metabolism in diverse environments;map04976 Bile secretion;
M227T400	0.108748	0.00763823	0.0021645	0.0229362	0.0078766	1.73561	exp:con	0.183248	HMDB0180803	(2Z)-3-[5-(prop-1-yn-1-yl)thiophen-2-yl]prop-2-enoic acid	n/a	C10H8O2S	192.025	M+Cl	-	226.994	2	n/a
M227T400	0.108748	0.00763823	0.0021645	0.0229362	0.0078766	1.73561	exp:con	0.183248	HMDB0168872	(2E)-5-(5-methylthiophen-2-yl)pent-2-en-4-ynoic acid	n/a	C10H8O2S	192.025	M+Cl	-	226.994	2	n/a
M227T400	0.108748	0.00763823	0.0021645	0.0229362	0.0078766	1.73561	exp:con	0.183248	HMDB0033845	(Z)-5-[(5-Methyl-2-thienyl)methylene]-2(5H)-furanone	n/a	C10H8O2S	192.025	M+Cl	-	226.994	2	n/a
M227T400	0.108748	0.00763823	0.0021645	0.0229362	0.0078766	1.73561	exp:con	0.183248	HMDB0149524	ACMC-20mker	n/a	C6H8O7	192.027	M+Cl	-	226.996	9	n/a
M227T400	0.108748	0.00763823	0.0021645	0.0229362	0.0078766	1.73561	exp:con	0.183248	HMDB0000094	Citric acid	C00158	C6H8O7	192.027	M+Cl	-	226.996	9	map00020 Citrate cycle (TCA cycle);map00250 Alanine, aspartate and glutamate metabolism;map00630 Glyoxylate and dicarboxylate metabolism;map00720 Carbon fixation pathways in prokaryotes;map01060 Biosynthesis of plant secondary metabolites;map01061 Biosynthesis of phenylpropanoids;map01062 Biosynthesis of terpenoids and steroids;map01063 Biosynthesis of alkaloids derived from shikimate pathway;map…
M227T400	0.108748	0.00763823	0.0021645	0.0229362	0.0078766	1.73561	exp:con	0.183248	HMDB0000193	Isocitric acid	C00311	C6H8O7	192.027	M+Cl	-	226.996	9	map00020 Citrate cycle (TCA cycle);map00630 Glyoxylate and dicarboxylate metabolism;map00720 Carbon fixation pathways in prokaryotes;map01060 Biosynthesis of plant secondary metabolites;map01061 Biosynthesis of phenylpropanoids;map01062 Biosynthesis of terpenoids and steroids;map01063 Biosynthesis of alkaloids derived from shikimate pathway;map01064 Biosynthesis of alkaloids derived from ornithin…
M227T400	0.108748	0.00763823	0.0021645	0.0229362	0.0078766	1.73561	exp:con	0.183248	HMDB0001874	D-threo-Isocitric acid	C00451	C6H8O7	192.027	M+Cl	-	226.996	9	n/a
M227T400	0.108748	0.00763823	0.0021645	0.0229362	0.0078766	1.73561	exp:con	0.183248	HMDB0005971	Diketogulonic acid	C04575	C6H8O7	192.027	M+Cl	-	226.996	9	map00040 Pentose and glucuronate interconversions;map00053 Ascorbate and aldarate metabolism;
M227T400	0.108748	0.00763823	0.0021645	0.0229362	0.0078766	1.73561	exp:con	0.183248	HMDB0006511	2,3-Diketo-L-gulonate	C04575	C6H8O7	192.027	M+Cl	-	226.996	9	n/a
M227T400	0.108748	0.00763823	0.0021645	0.0229362	0.0078766	1.73561	exp:con	0.183248	HMDB0033717	(1R,2R)-Isocitric acid	C04617	C6H8O7	192.027	M+Cl	-	226.996	9	n/a
M227T400	0.108748	0.00763823	0.0021645	0.0229362	0.0078766	1.73561	exp:con	0.183248	HMDB0041862	D-Glucaro-1,4-lactone	n/a	C6H8O7	192.027	M+Cl	-	226.996	9	n/a
M227T400	0.108748	0.00763823	0.0021645	0.0229362	0.0078766	1.73561	exp:con	0.183248	HMDB0062803	4,5,6-trihydroxy-2,3-dioxohexanoic acid	n/a	C6H8O7	192.027	M+Cl	-	226.996	9	n/a
M251T154	0.491695	0.00646086	0.0151515	0.0202442	0.0368461	1.03674	exp:con	0.113723	HMDB0135313	(3-phenylpropoxy)sulfonic acid	n/a	C9H12O4S	216.046	M+Cl	-	251.015	3	n/a
M251T154	0.491695	0.00646086	0.0151515	0.0202442	0.0368461	1.03674	exp:con	0.113723	HMDB0169122	[3-(propan-2-yl)phenyl]oxidanesulfonic acid	n/a	C9H12O4S	216.046	M+Cl	-	251.015	3	n/a
M251T154	0.491695	0.00646086	0.0151515	0.0202442	0.0368461	1.03674	exp:con	0.113723	HMDB0169126	(2-phenylpropoxy)sulfonic acid	n/a	C9H12O4S	216.046	M+Cl	-	251.015	3	n/a
M251T154	0.491695	0.00646086	0.0151515	0.0202442	0.0368461	1.03674	exp:con	0.113723	HMDB0169124	[4-(propan-2-yl)phenyl]oxidanesulfonic acid	n/a	C9H12O4S	216.046	M+Cl	-	251.015	3	n/a
M251T154	0.491695	0.00646086	0.0151515	0.0202442	0.0368461	1.03674	exp:con	0.113723	HMDB0173829	[1-(4-methylphenyl)ethoxy]sulfonic acid	n/a	C9H12O4S	216.046	M+Cl	-	251.015	3	n/a
M281T59	0.125758	0.00975666	0.004329	0.0274861	0.0134018	1.61659	exp:con	0.189092	HMDB0011166	L-beta-aspartyl-L-leucine	n/a	C10H18N2O5	246.122	M+Cl	-	281.091	6	n/a
M281T59	0.125758	0.00975666	0.004329	0.0274861	0.0134018	1.61659	exp:con	0.189092	HMDB0011172	gamma-Glutamylvaline	n/a	C10H18N2O5	246.122	M+Cl	-	281.091	6	n/a
M281T59	0.125758	0.00975666	0.004329	0.0274861	0.0134018	1.61659	exp:con	0.189092	HMDB0029162	gamma-Glutamylvaline	n/a	C10H18N2O5	246.122	M+Cl	-	281.091	6	n/a
M281T59	0.125758	0.00975666	0.004329	0.0274861	0.0134018	1.61659	exp:con	0.189092	HMDB0028832	Glutamylvaline	n/a	C10H18N2O5	246.122	M+Cl	-	281.091	6	n/a
M281T59	0.125758	0.00975666	0.004329	0.0274861	0.0134018	1.61659	exp:con	0.189092	HMDB0059717	Glutamylvaline	n/a	C10H18N2O5	246.122	M+Cl	-	281.091	6	n/a
M281T59	0.125758	0.00975666	0.004329	0.0274861	0.0134018	1.61659	exp:con	0.189092	HMDB0028925	Leucyl-Aspartate	n/a	C10H18N2O5	246.122	M+Cl	-	281.091	6	n/a
M281T59	0.125758	0.00975666	0.004329	0.0274861	0.0134018	1.61659	exp:con	0.189092	HMDB0028903	Isoleucyl-Aspartate	n/a	C10H18N2O5	246.122	M+Cl	-	281.091	6	n/a
M281T59	0.125758	0.00975666	0.004329	0.0274861	0.0134018	1.61659	exp:con	0.189092	HMDB0028757	Aspartyl-Leucine	n/a	C10H18N2O5	246.122	M+Cl	-	281.091	6	n/a
M281T59	0.125758	0.00975666	0.004329	0.0274861	0.0134018	1.61659	exp:con	0.189092	HMDB0028756	Aspartyl-Isoleucine	n/a	C10H18N2O5	246.122	M+Cl	-	281.091	6	n/a
M281T59	0.125758	0.00975666	0.004329	0.0274861	0.0134018	1.61659	exp:con	0.189092	HMDB0029126	Valyl-Glutamate	n/a	C10H18N2O5	246.122	M+Cl	-	281.091	6	n/a
M289T142	2.29305	8.86e-06	0.0021645	0.000284555	0.0078766	1.45984	exp:con	0.0280382	HMDB0014789	Dyphylline	C07819	C10H14N4O4	254.102	M+Cl	-	289.071	0	n/a
M289T142	2.29305	8.86e-06	0.0021645	0.000284555	0.0078766	1.45984	exp:con	0.0280382	HMDB0038664	(2R)-1-O-beta-D-Galactopyranosylglycerol	n/a	C9H18O8	254.1	M+Cl	-	289.07	4	n/a
M289T142	2.29305	8.86e-06	0.0021645	0.000284555	0.0078766	1.45984	exp:con	0.0280382	HMDB0006790	Galactosylglycerol	C05401	C9H18O8	254.1	M+Cl	-	289.07	4	map00052 Galactose metabolism;map00561 Glycerolipid metabolism;
M289T142	2.29305	8.86e-06	0.0021645	0.000284555	0.0078766	1.45984	exp:con	0.0280382	HMDB0062112	2-[(1,3-dihydroxypropan-2-yl)oxy]-6-(hydroxymethyl)oxane-3,4,5-triol	n/a	C9H18O8	254.1	M+Cl	-	289.07	4	n/a
M297T60	0.367426	0.00172434	0.004329	0.00778256	0.0134018	1.34487	exp:con	0.21589	HMDB0179531	[3-methyl-2,5-dioxo-6-(propan-2-yl)cyclohex-3-en-1-yl]oxidanesulfonic acid	n/a	C10H14O6S	262.051	M+Cl	-	297.021	4	n/a
M297T60	0.367426	0.00172434	0.004329	0.00778256	0.0134018	1.34487	exp:con	0.21589	HMDB0179529	[2-(4-methyl-2,5-dioxocyclohex-3-en-1-yl)propoxy]sulfonic acid	n/a	C10H14O6S	262.051	M+Cl	-	297.021	4	n/a
M297T60	0.367426	0.00172434	0.004329	0.00778256	0.0134018	1.34487	exp:con	0.21589	HMDB0179537	{[2,5-dihydroxy-4-(propan-2-yl)phenyl]methoxy}sulfonic acid	n/a	C10H14O6S	262.051	M+Cl	-	297.021	4	n/a
M297T60	0.367426	0.00172434	0.004329	0.00778256	0.0134018	1.34487	exp:con	0.21589	HMDB0179548	[2-(2,5-dihydroxy-4-methylphenyl)propoxy]sulfonic acid	n/a	C10H14O6S	262.051	M+Cl	-	297.021	4	n/a
M297T60	0.367426	0.00172434	0.004329	0.00778256	0.0134018	1.34487	exp:con	0.21589	HMDB0181724	2-methyl-3-[(sulfooxy)methyl]tricyclo[2.2.1.0²,⁶]heptane-3-carboxylic acid	n/a	C10H14O6S	262.051	M+Cl	-	297.021	4	n/a
M297T60	0.367426	0.00172434	0.004329	0.00778256	0.0134018	1.34487	exp:con	0.21589	HMDB0181727	3-methyl-2-[(sulfooxy)methyl]tricyclo[2.2.1.0²,⁶]heptane-3-carboxylic acid	n/a	C10H14O6S	262.051	M+Cl	-	297.021	4	n/a
M297T60	0.367426	0.00172434	0.004329	0.00778256	0.0134018	1.34487	exp:con	0.21589	HMDB0179524	{[3,6-dioxo-4-(propan-2-yl)cyclohex-1-en-1-yl]methoxy}sulfonic acid	n/a	C10H14O6S	262.051	M+Cl	-	297.021	4	n/a
M297T60	0.367426	0.00172434	0.004329	0.00778256	0.0134018	1.34487	exp:con	0.21589	HMDB0179520	[2-(4-methyl-3,6-dioxocyclohex-1-en-1-yl)propoxy]sulfonic acid	n/a	C10H14O6S	262.051	M+Cl	-	297.021	4	n/a
M297T60	0.367426	0.00172434	0.004329	0.00778256	0.0134018	1.34487	exp:con	0.21589	HMDB0179522	[6-methyl-2,5-dioxo-3-(propan-2-yl)cyclohex-3-en-1-yl]oxidanesulfonic acid	n/a	C10H14O6S	262.051	M+Cl	-	297.021	4	n/a
M297T60	0.367426	0.00172434	0.004329	0.00778256	0.0134018	1.34487	exp:con	0.21589	HMDB0179514	{[2,5-dioxo-4-(propan-2-yl)cyclohex-3-en-1-yl]methoxy}sulfonic acid	n/a	C10H14O6S	262.051	M+Cl	-	297.021	4	n/a
M297T60	0.367426	0.00172434	0.004329	0.00778256	0.0134018	1.34487	exp:con	0.21589	HMDB0163184	(4Z,7Z)-10-(sulfooxy)deca-2,4,7-trienoic acid	n/a	C10H14O6S	262.051	M+Cl	-	297.021	4	n/a
M297T60	0.367426	0.00172434	0.004329	0.00778256	0.0134018	1.34487	exp:con	0.21589	HMDB0163172	(4Z,7Z)-9-(sulfooxy)deca-2,4,7-trienoic acid	n/a	C10H14O6S	262.051	M+Cl	-	297.021	4	n/a
M297T60	0.367426	0.00172434	0.004329	0.00778256	0.0134018	1.34487	exp:con	0.21589	HMDB0145929	(4-ethyl-2,6-dimethoxyphenyl)oxidanesulfonic acid	n/a	C10H14O6S	262.051	M+Cl	-	297.021	4	n/a
M297T60	0.367426	0.00172434	0.004329	0.00778256	0.0134018	1.34487	exp:con	0.21589	HMDB0181730	2,3-dimethyl-5-(sulfooxy)tricyclo[2.2.1.0²,⁶]heptane-3-carboxylic acid	n/a	C10H14O6S	262.051	M+Cl	-	297.021	4	n/a
M301T161	4.09889	0.000482078	0.0021645	0.00325693	0.0078766	2.03044	exp:con	0.0531559	HMDB0186392	3,4,5-trihydroxy-6-[(1-hydroxy-3-oxopropan-2-yl)oxy]oxane-2-carboxylic acid	n/a	C9H14O9	266.064	M+Cl	-	301.033	4	n/a
M301T161	4.09889	0.000482078	0.0021645	0.00325693	0.0078766	2.03044	exp:con	0.0531559	HMDB0186391	3,4,5-trihydroxy-6-(2-hydroxy-3-oxopropoxy)oxane-2-carboxylic acid	n/a	C9H14O9	266.064	M+Cl	-	301.033	4	n/a
M301T161	4.09889	0.000482078	0.0021645	0.00325693	0.0078766	2.03044	exp:con	0.0531559	HMDB0155754	3,4,5-trihydroxy-6-[(2-hydroxypropanoyl)oxy]oxane-2-carboxylic acid	n/a	C9H14O9	266.064	M+Cl	-	301.033	4	n/a
M301T161	4.09889	0.000482078	0.0021645	0.00325693	0.0078766	2.03044	exp:con	0.0531559	HMDB0155753	6-(1-carboxyethoxy)-3,4,5-trihydroxyoxane-2-carboxylic acid	n/a	C9H14O9	266.064	M+Cl	-	301.033	4	n/a
M301T161	4.09889	0.000482078	0.0021645	0.00325693	0.0078766	2.03044	exp:con	0.0531559	HMDB0125085	3-oxo-3-[(3,4,5,6-tetrahydroxyoxan-2-yl)methoxy]propanoic acid	n/a	C9H14O9	266.064	M+Cl	-	301.033	4	n/a
M301T161	4.09889	0.000482078	0.0021645	0.00325693	0.0078766	2.03044	exp:con	0.0531559	HMDB0032437	Monoglyceride citrate	n/a	C9H14O9	266.064	M+Cl	-	301.033	4	n/a
M333T153	7.10967	0.00121218	0.0021645	0.00606391	0.0078766	2.01154	exp:con	0.00185423	HMDB0036159	Toxin T2 tetrol	n/a	C15H22O6	298.142	M+Cl	-	333.111	4	n/a
M333T153	7.10967	0.00121218	0.0021645	0.00606391	0.0078766	2.01154	exp:con	0.00185423	HMDB0037560	3,7,8,15-Scirpenetetrol	n/a	C15H22O6	298.142	M+Cl	-	333.111	4	n/a
M333T153	7.10967	0.00121218	0.0021645	0.00606391	0.0078766	2.01154	exp:con	0.00185423	HMDB0145045	4-{2-[4-(diaminomethylidene)cyclohexa-2,5-dien-1-ylidene]ethyl}-2-hydroxy-3-oxocyclohexa-1,5-diene-1-carboximidamide	n/a	C16H18N4O2	298.143	M+Cl	-	333.112	8	n/a
M333T153	7.10967	0.00121218	0.0021645	0.00606391	0.0078766	2.01154	exp:con	0.00185423	HMDB0145052	(4E)-4-{2-[4-(diaminomethylidene)cyclohexa-2,5-dien-1-ylidene]ethylidene}-6-hydroxy-5-oxocyclohex-2-ene-1-carboximidamide	n/a	C16H18N4O2	298.143	M+Cl	-	333.112	8	n/a
M333T153	7.10967	0.00121218	0.0021645	0.00606391	0.0078766	2.01154	exp:con	0.00185423	HMDB0145051	(5Z)-5-{2-[4-(diaminomethylidene)cyclohexa-2,5-dien-1-ylidene]ethylidene}-4-oxo-7-oxabicyclo[4.1.0]heptane-2-carboximidamide	n/a	C16H18N4O2	298.143	M+Cl	-	333.112	8	n/a
M333T153	7.10967	0.00121218	0.0021645	0.00606391	0.0078766	2.01154	exp:con	0.00185423	HMDB0145050	(4E)-4-{2-[4-(diaminomethylidene)cyclohexa-2,5-dien-1-ylidene]ethylidene}-1-hydroxy-5-oxocyclohex-2-ene-1-carboximidamide	n/a	C16H18N4O2	298.143	M+Cl	-	333.112	8	n/a
M333T153	7.10967	0.00121218	0.0021645	0.00606391	0.0078766	2.01154	exp:con	0.00185423	HMDB0145047	5-{2-[4-(diaminomethylidene)cyclohexa-2,5-dien-1-ylidene]ethyl}-4-oxo-7-oxabicyclo[4.1.0]hept-2-ene-2-carboximidamide	n/a	C16H18N4O2	298.143	M+Cl	-	333.112	8	n/a
M333T153	7.10967	0.00121218	0.0021645	0.00606391	0.0078766	2.01154	exp:con	0.00185423	HMDB0145046	4-{2-[4-(diaminomethylidene)cyclohexa-2,5-dien-1-ylidene]ethyl}-5-oxo-7-oxabicyclo[4.1.0]hept-2-ene-1-carboximidamide	n/a	C16H18N4O2	298.143	M+Cl	-	333.112	8	n/a
M333T153	7.10967	0.00121218	0.0021645	0.00606391	0.0078766	2.01154	exp:con	0.00185423	HMDB0145048	4-{2-[4-(diaminomethylidene)cyclohexa-2,5-dien-1-ylidene]ethyl}-4-hydroxy-3-oxocyclohexa-1,5-diene-1-carboximidamide	n/a	C16H18N4O2	298.143	M+Cl	-	333.112	8	n/a
M351T177_2	0.0639141	0.000275538	0.0021645	0.00222193	0.0078766	2.27446	exp:con	1.46e-07	HMDB0062734	2-S-cysteinyl-DOPA	n/a	C12H16N2O6S	316.073	M+Cl	-	351.042	4	n/a
M367T145	3.77683	0.00131575	0.0021645	0.0064476	0.0078766	1.98699	exp:con	0.0327228	HMDB0014698	Zanamivir	C08095	C12H20N4O7	332.133	M+Cl	-	367.103	2	n/a
M367T145	3.77683	0.00131575	0.0021645	0.0064476	0.0078766	1.98699	exp:con	0.0327228	HMDB0060831	meta-O-Dealkylated flecainide	n/a	C15H19F3N2O3	332.135	M+Cl	-	367.104	7	n/a
M367T145	3.77683	0.00131575	0.0021645	0.0064476	0.0078766	1.98699	exp:con	0.0327228	HMDB0183519	[(8aS)-4-hydroxy-8a-(hydroxymethyl)-1-methyl-7-(prop-1-en-2-yl)-1,2,3,4,6,7,8,8a-octahydronaphthalen-2-yl]oxidanesulfonic acid	n/a	C15H24O6S	332.129	M+Cl	-	367.099	8	n/a
M367T145	3.77683	0.00131575	0.0021645	0.0064476	0.0078766	1.98699	exp:con	0.0327228	HMDB0183517	{[(4aS)-1,3-dihydroxy-4-methyl-6-(prop-1-en-2-yl)-1,2,3,4,4a,5,6,7-octahydronaphthalen-4a-yl]methoxy}sulfonic acid	n/a	C15H24O6S	332.129	M+Cl	-	367.099	8	n/a
M367T145	3.77683	0.00131575	0.0021645	0.0064476	0.0078766	1.98699	exp:con	0.0327228	HMDB0183522	{[(8aR)-2,4-dihydroxy-8a-methyl-7-(prop-1-en-2-yl)-1,2,3,4,6,7,8,8a-octahydronaphthalen-1-yl]methoxy}sulfonic acid	n/a	C15H24O6S	332.129	M+Cl	-	367.099	8	n/a
M367T145	3.77683	0.00131575	0.0021645	0.0064476	0.0078766	1.98699	exp:con	0.0327228	HMDB0182396	[10-(hydroxymethyl)-6-methyl-8-oxo-2-(prop-1-en-2-yl)spiro[4.5]decan-7-yl]oxidanesulfonic acid	n/a	C15H24O6S	332.129	M+Cl	-	367.099	8	n/a
M367T145	3.77683	0.00131575	0.0021645	0.0064476	0.0078766	1.98699	exp:con	0.0327228	HMDB0182392	[6-(hydroxymethyl)-10-methyl-8-oxo-2-(prop-1-en-2-yl)spiro[4.5]decan-7-yl]oxidanesulfonic acid	n/a	C15H24O6S	332.129	M+Cl	-	367.099	8	n/a
M367T145	3.77683	0.00131575	0.0021645	0.0064476	0.0078766	1.98699	exp:con	0.0327228	HMDB0182395	{[9-hydroxy-10-methyl-8-oxo-2-(prop-1-en-2-yl)spiro[4.5]decan-6-yl]methoxy}sulfonic acid	n/a	C15H24O6S	332.129	M+Cl	-	367.099	8	n/a
M367T145	3.77683	0.00131575	0.0021645	0.0064476	0.0078766	1.98699	exp:con	0.0327228	HMDB0182388	{[10-methyl-2-(2-methyloxiran-2-yl)-8-oxospiro[4.5]decan-6-yl]methoxy}sulfonic acid	n/a	C15H24O6S	332.129	M+Cl	-	367.099	8	n/a
M367T145	3.77683	0.00131575	0.0021645	0.0064476	0.0078766	1.98699	exp:con	0.0327228	HMDB0182391	{[7-hydroxy-10-methyl-8-oxo-2-(prop-1-en-2-yl)spiro[4.5]decan-6-yl]methoxy}sulfonic acid	n/a	C15H24O6S	332.129	M+Cl	-	367.099	8	n/a
M367T145	3.77683	0.00131575	0.0021645	0.0064476	0.0078766	1.98699	exp:con	0.0327228	HMDB0182385	[6-(hydroxymethyl)-10-methyl-8-oxo-3-(prop-1-en-2-yl)spiro[4.5]decan-1-yl]oxidanesulfonic acid	n/a	C15H24O6S	332.129	M+Cl	-	367.099	8	n/a
M367T145	3.77683	0.00131575	0.0021645	0.0064476	0.0078766	1.98699	exp:con	0.0327228	HMDB0182384	{[1-hydroxy-10-methyl-8-oxo-3-(prop-1-en-2-yl)spiro[4.5]decan-6-yl]methoxy}sulfonic acid	n/a	C15H24O6S	332.129	M+Cl	-	367.099	8	n/a
M367T145	3.77683	0.00131575	0.0021645	0.0064476	0.0078766	1.98699	exp:con	0.0327228	HMDB0183523	[(4aR)-3-hydroxy-4-(hydroxymethyl)-4a-methyl-6-(prop-1-en-2-yl)-1,2,3,4,4a,5,6,7-octahydronaphthalen-1-yl]oxidanesulfonic acid	n/a	C15H24O6S	332.129	M+Cl	-	367.099	8	n/a
M367T145	3.77683	0.00131575	0.0021645	0.0064476	0.0078766	1.98699	exp:con	0.0327228	HMDB0183524	[(8aR)-4-hydroxy-1-(hydroxymethyl)-8a-methyl-7-(prop-1-en-2-yl)-1,2,3,4,6,7,8,8a-octahydronaphthalen-2-yl]oxidanesulfonic acid	n/a	C15H24O6S	332.129	M+Cl	-	367.099	8	n/a
M367T145	3.77683	0.00131575	0.0021645	0.0064476	0.0078766	1.98699	exp:con	0.0327228	HMDB0183532	[(8aR)-4,7-dihydroxy-1,8a-dimethyl-7-(prop-1-en-2-yl)-1,2,3,4,6,7,8,8a-octahydronaphthalen-2-yl]oxidanesulfonic acid	n/a	C15H24O6S	332.129	M+Cl	-	367.099	8	n/a
M367T145	3.77683	0.00131575	0.0021645	0.0064476	0.0078766	1.98699	exp:con	0.0327228	HMDB0184290	[(4aR)-3-hydroxy-6-(3-hydroxyprop-1-en-2-yl)-4,4a-dimethyl-1,2,3,4,4a,5,6,7-octahydronaphthalen-1-yl]oxidanesulfonic acid	n/a	C15H24O6S	332.129	M+Cl	-	367.099	8	n/a
M367T145	3.77683	0.00131575	0.0021645	0.0064476	0.0078766	1.98699	exp:con	0.0327228	HMDB0184282	[(4aS)-3-hydroxy-4a-(hydroxymethyl)-4-methyl-6-(prop-1-en-2-yl)-1,2,3,4,4a,5,6,7-octahydronaphthalen-1-yl]oxidanesulfonic acid	n/a	C15H24O6S	332.129	M+Cl	-	367.099	8	n/a
M367T145	3.77683	0.00131575	0.0021645	0.0064476	0.0078766	1.98699	exp:con	0.0327228	HMDB0183549	[(8aR)-4-hydroxy-1,8a-dimethyl-7-(2-methyloxiran-2-yl)-1,2,3,4,6,7,8,8a-octahydronaphthalen-2-yl]oxidanesulfonic acid	n/a	C15H24O6S	332.129	M+Cl	-	367.099	8	n/a
M367T145	3.77683	0.00131575	0.0021645	0.0064476	0.0078766	1.98699	exp:con	0.0327228	HMDB0183548	[(4aR)-3-hydroxy-4,4a-dimethyl-6-(2-methyloxiran-2-yl)-1,2,3,4,4a,5,6,7-octahydronaphthalen-1-yl]oxidanesulfonic acid	n/a	C15H24O6S	332.129	M+Cl	-	367.099	8	n/a
M367T145	3.77683	0.00131575	0.0021645	0.0064476	0.0078766	1.98699	exp:con	0.0327228	HMDB0183542	[(4aR)-6,8-dihydroxy-4a,5-dimethyl-3-(prop-1-en-2-yl)-2,3,4,4a,5,6,7,8-octahydronaphthalen-2-yl]oxidanesulfonic acid	n/a	C15H24O6S	332.129	M+Cl	-	367.099	8	n/a
M367T145	3.77683	0.00131575	0.0021645	0.0064476	0.0078766	1.98699	exp:con	0.0327228	HMDB0183543	[(4aR)-3,7-dihydroxy-4,4a-dimethyl-6-(prop-1-en-2-yl)-1,2,3,4,4a,5,6,7-octahydronaphthalen-1-yl]oxidanesulfonic acid	n/a	C15H24O6S	332.129	M+Cl	-	367.099	8	n/a
M367T145	3.77683	0.00131575	0.0021645	0.0064476	0.0078766	1.98699	exp:con	0.0327228	HMDB0183536	({2-[(8aR)-5,7-dihydroxy-8,8a-dimethyl-1,2,3,5,6,7,8,8a-octahydronaphthalen-2-yl]prop-2-en-1-yl}oxy)sulfonic acid	n/a	C15H24O6S	332.129	M+Cl	-	367.099	8	n/a
M367T145	3.77683	0.00131575	0.0021645	0.0064476	0.0078766	1.98699	exp:con	0.0327228	HMDB0183538	[(8aR)-4-hydroxy-7-(3-hydroxyprop-1-en-2-yl)-1,8a-dimethyl-1,2,3,4,6,7,8,8a-octahydronaphthalen-2-yl]oxidanesulfonic acid	n/a	C15H24O6S	332.129	M+Cl	-	367.099	8	n/a
M367T145	3.77683	0.00131575	0.0021645	0.0064476	0.0078766	1.98699	exp:con	0.0327228	HMDB0183531	[(4aR)-3,6-dihydroxy-4,4a-dimethyl-6-(prop-1-en-2-yl)-1,2,3,4,4a,5,6,7-octahydronaphthalen-1-yl]oxidanesulfonic acid	n/a	C15H24O6S	332.129	M+Cl	-	367.099	8	n/a
M367T145	3.77683	0.00131575	0.0021645	0.0064476	0.0078766	1.98699	exp:con	0.0327228	HMDB0183528	[(4aS)-3,4-dihydroxy-4,4a-dimethyl-6-(prop-1-en-2-yl)-1,2,3,4,4a,5,6,7-octahydronaphthalen-1-yl]oxidanesulfonic acid	n/a	C15H24O6S	332.129	M+Cl	-	367.099	8	n/a
M367T145	3.77683	0.00131575	0.0021645	0.0064476	0.0078766	1.98699	exp:con	0.0327228	HMDB0182380	{[2-hydroxy-10-methyl-8-oxo-3-(prop-1-en-2-yl)spiro[4.5]decan-6-yl]methoxy}sulfonic acid	n/a	C15H24O6S	332.129	M+Cl	-	367.099	8	n/a
M367T145	3.77683	0.00131575	0.0021645	0.0064476	0.0078766	1.98699	exp:con	0.0327228	HMDB0182381	[6-(hydroxymethyl)-10-methyl-8-oxo-3-(prop-1-en-2-yl)spiro[4.5]decan-2-yl]oxidanesulfonic acid	n/a	C15H24O6S	332.129	M+Cl	-	367.099	8	n/a
M367T145	3.77683	0.00131575	0.0021645	0.0064476	0.0078766	1.98699	exp:con	0.0327228	HMDB0182376	{[1-hydroxy-10-methyl-8-oxo-2-(prop-1-en-2-yl)spiro[4.5]decan-6-yl]methoxy}sulfonic acid	n/a	C15H24O6S	332.129	M+Cl	-	367.099	8	n/a
M367T145	3.77683	0.00131575	0.0021645	0.0064476	0.0078766	1.98699	exp:con	0.0327228	HMDB0179159	{2-[(4Z)-4,8-dimethyl-2,9-dioxocyclodec-4-en-1-yl]propoxy}sulfonic acid	n/a	C15H24O6S	332.129	M+Cl	-	367.099	8	n/a
M367T145	3.77683	0.00131575	0.0021645	0.0064476	0.0078766	1.98699	exp:con	0.0327228	HMDB0179156	[(2Z)-3,9-dimethyl-5,8-dioxo-6-(propan-2-yl)cyclodec-2-en-1-yl]oxidanesulfonic acid	n/a	C15H24O6S	332.129	M+Cl	-	367.099	8	n/a
M367T145	3.77683	0.00131575	0.0021645	0.0064476	0.0078766	1.98699	exp:con	0.0327228	HMDB0179150	{[(1E)-5-methyl-6,9-dioxo-8-(propan-2-yl)cyclodec-1-en-1-yl]methoxy}sulfonic acid	n/a	C15H24O6S	332.129	M+Cl	-	367.099	8	n/a
M367T145	3.77683	0.00131575	0.0021645	0.0064476	0.0078766	1.98699	exp:con	0.0327228	HMDB0179152	{[(4Z)-5-methyl-7,10-dioxo-8-(propan-2-yl)cyclodec-4-en-1-yl]methoxy}sulfonic acid	n/a	C15H24O6S	332.129	M+Cl	-	367.099	8	n/a
M367T145	3.77683	0.00131575	0.0021645	0.0064476	0.0078766	1.98699	exp:con	0.0327228	HMDB0177248	[(7bR)-2-hydroxy-3-(hydroxymethyl)-6,6,7b-trimethyl-1H,2H,4H,4aH,5H,6H,7H,7aH,7bH-cyclobuta[e]inden-4-yl]oxidanesulfonic acid	n/a	C15H24O6S	332.129	M+Cl	-	367.099	8	n/a
M367T145	3.77683	0.00131575	0.0021645	0.0064476	0.0078766	1.98699	exp:con	0.0327228	HMDB0177247	[(7bR)-4-hydroxy-3-(hydroxymethyl)-6,6,7b-trimethyl-1H,2H,4H,4aH,5H,6H,7H,7aH,7bH-cyclobuta[e]inden-2-yl]oxidanesulfonic acid	n/a	C15H24O6S	332.129	M+Cl	-	367.099	8	n/a
M367T145	3.77683	0.00131575	0.0021645	0.0064476	0.0078766	1.98699	exp:con	0.0327228	HMDB0177246	{[(7bR)-2,4-dihydroxy-6,6,7b-trimethyl-1H,2H,4H,4aH,5H,6H,7H,7aH,7bH-cyclobuta[e]inden-3-yl]methoxy}sulfonic acid	n/a	C15H24O6S	332.129	M+Cl	-	367.099	8	n/a
M367T145	3.77683	0.00131575	0.0021645	0.0064476	0.0078766	1.98699	exp:con	0.0327228	HMDB0176731	[6-(hydroxymethyl)-1,2,10-trimethyl-7-oxatricyclo[6.4.0.0²,⁶]dodec-9-en-4-yl]oxidanesulfonic acid	n/a	C15H24O6S	332.129	M+Cl	-	367.099	8	n/a
M367T145	3.77683	0.00131575	0.0021645	0.0064476	0.0078766	1.98699	exp:con	0.0327228	HMDB0176730	({4-hydroxy-1,2,10-trimethyl-7-oxatricyclo[6.4.0.0²,⁶]dodec-9-en-6-yl}methoxy)sulfonic acid	n/a	C15H24O6S	332.129	M+Cl	-	367.099	8	n/a
M367T145	3.77683	0.00131575	0.0021645	0.0064476	0.0078766	1.98699	exp:con	0.0327228	HMDB0168822	{[(6Z,10E)-8-hydroxy-2,6,10-trimethyl-12-oxododeca-2,6,10-trien-5-yl]oxy}sulfonic acid	n/a	C15H24O6S	332.129	M+Cl	-	367.099	8	n/a
M367T145	3.77683	0.00131575	0.0021645	0.0064476	0.0078766	1.98699	exp:con	0.0327228	HMDB0179163	[(5Z)-5,9-dimethyl-3,10-dioxo-2-(propan-2-yl)cyclodec-5-en-1-yl]oxidanesulfonic acid	n/a	C15H24O6S	332.129	M+Cl	-	367.099	8	n/a
M367T145	3.77683	0.00131575	0.0021645	0.0064476	0.0078766	1.98699	exp:con	0.0327228	HMDB0179161	[(2Z)-2,6-dimethyl-7,10-dioxo-9-(propan-2-yl)cyclodec-2-en-1-yl]oxidanesulfonic acid	n/a	C15H24O6S	332.129	M+Cl	-	367.099	8	n/a
M367T145	3.77683	0.00131575	0.0021645	0.0064476	0.0078766	1.98699	exp:con	0.0327228	HMDB0182377	[6-(hydroxymethyl)-10-methyl-8-oxo-2-(prop-1-en-2-yl)spiro[4.5]decan-1-yl]oxidanesulfonic acid	n/a	C15H24O6S	332.129	M+Cl	-	367.099	8	n/a
M367T145	3.77683	0.00131575	0.0021645	0.0064476	0.0078766	1.98699	exp:con	0.0327228	HMDB0182373	{[2-(3-hydroxyprop-1-en-2-yl)-10-methyl-8-oxospiro[4.5]decan-6-yl]methoxy}sulfonic acid	n/a	C15H24O6S	332.129	M+Cl	-	367.099	8	n/a
M367T145	3.77683	0.00131575	0.0021645	0.0064476	0.0078766	1.98699	exp:con	0.0327228	HMDB0182372	({2-[6-(hydroxymethyl)-10-methyl-8-oxospiro[4.5]decan-2-yl]prop-2-en-1-yl}oxy)sulfonic acid	n/a	C15H24O6S	332.129	M+Cl	-	367.099	8	n/a
M367T145	3.77683	0.00131575	0.0021645	0.0064476	0.0078766	1.98699	exp:con	0.0327228	HMDB0182369	{[2-hydroxy-10-methyl-8-oxo-2-(prop-1-en-2-yl)spiro[4.5]decan-6-yl]methoxy}sulfonic acid	n/a	C15H24O6S	332.129	M+Cl	-	367.099	8	n/a
M367T145	3.77683	0.00131575	0.0021645	0.0064476	0.0078766	1.98699	exp:con	0.0327228	HMDB0182366	{[10-hydroxy-10-methyl-8-oxo-2-(prop-1-en-2-yl)spiro[4.5]decan-6-yl]methoxy}sulfonic acid	n/a	C15H24O6S	332.129	M+Cl	-	367.099	8	n/a
M367T145	3.77683	0.00131575	0.0021645	0.0064476	0.0078766	1.98699	exp:con	0.0327228	HMDB0182363	{[10-(hydroxymethyl)-8-oxo-2-(prop-1-en-2-yl)spiro[4.5]decan-6-yl]methoxy}sulfonic acid	n/a	C15H24O6S	332.129	M+Cl	-	367.099	8	n/a
M367T145	3.77683	0.00131575	0.0021645	0.0064476	0.0078766	1.98699	exp:con	0.0327228	HMDB0179305	{[2-(4-hydroxy-4-methylcyclohex-2-en-1-yl)-6-methyl-4-oxohept-5-en-3-yl]oxy}sulfonic acid	n/a	C15H24O6S	332.129	M+Cl	-	367.099	8	n/a
M367T145	3.77683	0.00131575	0.0021645	0.0064476	0.0078766	1.98699	exp:con	0.0327228	HMDB0179302	{[2-(4-hydroxy-4-methylcyclohex-2-en-1-yl)-6-methyl-4-oxohept-5-en-1-yl]oxy}sulfonic acid	n/a	C15H24O6S	332.129	M+Cl	-	367.099	8	n/a
M367T145	3.77683	0.00131575	0.0021645	0.0064476	0.0078766	1.98699	exp:con	0.0327228	HMDB0179294	{[6-(4-hydroxy-4-methylcyclohex-2-en-1-yl)-2-methyl-4-oxohept-2-en-1-yl]oxy}sulfonic acid	n/a	C15H24O6S	332.129	M+Cl	-	367.099	8	n/a
M367T145	3.77683	0.00131575	0.0021645	0.0064476	0.0078766	1.98699	exp:con	0.0327228	HMDB0179287	{[1-hydroxy-4-(6-methyl-4-oxohept-5-en-2-yl)cyclohex-2-en-1-yl]methoxy}sulfonic acid	n/a	C15H24O6S	332.129	M+Cl	-	367.099	8	n/a
M367T145	3.77683	0.00131575	0.0021645	0.0064476	0.0078766	1.98699	exp:con	0.0327228	HMDB0168821	{[(2E,6Z)-8-hydroxy-3,7,11-trimethyl-1-oxododeca-2,6,10-trien-5-yl]oxy}sulfonic acid	n/a	C15H24O6S	332.129	M+Cl	-	367.099	8	n/a
M370T68	0.228346	0.00473862	0.0411255	0.0160286	0.0811879	1.77055	exp:con	0.0502871	HMDB0174935	6-{2-[amino(carboxy)methyl]cyclopropanecarbonyloxy}-3,4,5-trihydroxyoxane-2-carboxylic acid	n/a	C12H17NO10	335.085	M+Cl	-	370.055	1	n/a
M370T68	0.228346	0.00473862	0.0411255	0.0160286	0.0811879	1.77055	exp:con	0.0502871	HMDB0162702	{[(7Z)-11-oxo-11-(1,2,3,4-tetrahydropyridin-1-yl)undeca-7,9-dien-1,3-diyn-6-yl]oxy}sulfonic acid	n/a	C16H17NO5S	335.083	M+Cl	-	370.052	8	n/a
M397T142	0.490225	0.000411564	0.0021645	0.00292359	0.0078766	1.19641	exp:con	0.0232573	HMDB0140630	2-[2-(3,7-dimethylocta-2,6-dien-1-yl)-3-hydroxyphenyl]-1-benzofuran-6-ol	n/a	C24H26O3	362.188	M+Cl	-	397.158	6	n/a
M400T102	2.00967	0.000998317	0.0021645	0.00532718	0.0078766	1.23562	exp:con	1.15e-10	HMDB0161109	6-{[(5-amino-5-carboxypentyl)-C-hydroxycarbonimidoyl]amino}-3,4,5-trihydroxyoxane-2-carboxylic acid	n/a	C13H23N3O9	365.143	M+Cl	-	400.113	10	n/a
M401T400_1	0.283618	0.00983176	0.0151515	0.0276533	0.0368461	1.47365	exp:con	0.0894084	HMDB0168259	3-hydroxy-2-[2-(8-hydroxy-1,4-dioxo-1,4-dihydronaphthalen-2-yl)propanoyl]benzoic acid	n/a	C20H14O7	366.074	M+Cl	-	401.043	9	n/a
M401T400_1	0.283618	0.00983176	0.0151515	0.0276533	0.0368461	1.47365	exp:con	0.0894084	HMDB0168260	3-hydroxy-2-[2-(8-hydroxy-1,4-dioxo-1,2,3,4-tetrahydronaphthalen-2-yl)prop-2-enoyl]benzoic acid	n/a	C20H14O7	366.074	M+Cl	-	401.043	9	n/a
M401T400_1	0.283618	0.00983176	0.0151515	0.0276533	0.0368461	1.47365	exp:con	0.0894084	HMDB0168266	7,8,8'-trihydroxy-1H,1'H,2H,2'H,3H,3'H,4H,4'H-[2,2'-binaphthalene]-1,1',4,4'-tetrone	n/a	C20H14O7	366.074	M+Cl	-	401.043	9	n/a
M401T400_1	0.283618	0.00983176	0.0151515	0.0276533	0.0368461	1.47365	exp:con	0.0894084	HMDB0039046	Daphnoretin methyl ether	n/a	C20H14O7	366.074	M+Cl	-	401.043	9	n/a
M401T400_1	0.283618	0.00983176	0.0151515	0.0276533	0.0368461	1.47365	exp:con	0.0894084	HMDB0168265	6,8,8'-trihydroxy-1H,1'H,2H,2'H,3H,3'H,4H,4'H-[2,2'-binaphthalene]-1,1',4,4'-tetrone	n/a	C20H14O7	366.074	M+Cl	-	401.043	9	n/a
M413T392	0.305583	0.00410719	0.004329	0.0144152	0.0134018	1.49762	exp:con	9.64e-10	HMDB0040350	6,11-Dihydroxy-3-methyl-3-(4-methyl-3-pentenyl)-3H,7H-pyrano[2,3-c]xanthen-7-one	n/a	C23H22O5	378.147	M+Cl	-	413.116	1	n/a
M413T392	0.305583	0.00410719	0.004329	0.0144152	0.0134018	1.49762	exp:con	9.64e-10	HMDB0030656	Demethylcalabaxanthone	n/a	C23H22O5	378.147	M+Cl	-	413.116	1	n/a
M413T392	0.305583	0.00410719	0.004329	0.0144152	0.0134018	1.49762	exp:con	9.64e-10	HMDB0176473	(2-hydroxy-3-{[(9E,11E)-13-oxotrideca-9,11-dienoyl]oxy}propoxy)phosphonic acid	n/a	C16H27O8P	378.144	M+Cl	-	413.114	4	n/a
M413T392	0.305583	0.00410719	0.004329	0.0144152	0.0134018	1.49762	exp:con	9.64e-10	HMDB0176471	2-hydroxy-3-(phosphonatooxy)propyl (9E,11E)-13-oxotrideca-9,11-dienoate	n/a	C16H25O8P	376.13	M+Cl	-	413.114	4	n/a
M413T392	0.305583	0.00410719	0.004329	0.0144152	0.0134018	1.49762	exp:con	9.64e-10	HMDB0172506	3,4,5-trihydroxy-6-({1-methyl-1H,2H,3H,4H,9H-pyrido[3,4-b]indol-7-yl}oxy)oxane-2-carboxylic acid	n/a	C18H22N2O7	378.143	M+Cl	-	413.112	8	n/a
M413T392	0.305583	0.00410719	0.004329	0.0144152	0.0134018	1.49762	exp:con	9.64e-10	HMDB0138157	[(5-methoxy-1,7-diphenylheptan-3-yl)oxy]sulfonic acid	n/a	C20H26O5S	378.15	M+Cl	-	413.119	9	n/a
M417T134_1	2.1052	0.00058323	0.0021645	0.00369978	0.0078766	1.0667	exp:con	7.53e-08	HMDB0139745	N-(4-{[1-hydroxy-3-(4-hydroxyphenyl)propylidene]amino}butyl)-3-(4-hydroxyphenyl)prop-2-enimidic acid	n/a	C22H26N2O4	382.189	M+Cl	-	417.159	6	n/a
M417T134_1	2.1052	0.00058323	0.0021645	0.00369978	0.0078766	1.0667	exp:con	7.53e-08	HMDB0139746	(2E)-N-(4-{[1-hydroxy-3-(4-hydroxyphenyl)propylidene]amino}butyl)-3-(4-hydroxyphenyl)prop-2-enimidic acid	n/a	C22H26N2O4	382.189	M+Cl	-	417.159	6	n/a
M417T134_1	2.1052	0.00058323	0.0021645	0.00369978	0.0078766	1.0667	exp:con	7.53e-08	HMDB0015699	Tofisopam	n/a	C22H26N2O4	382.189	M+Cl	-	417.159	6	n/a
M427T364_2	2.61049	0.00221726	0.0151515	0.00934362	0.0368461	1.05415	exp:con	0.222824	HMDB0175530	6,10,14-trimethyl-2-methylidene-3-(sulfooxy)pentadecanoic acid	n/a	C19H36O6S	392.223	M+Cl	-	427.193	10	n/a
M427T364_2	2.61049	0.00221726	0.0151515	0.00934362	0.0368461	1.05415	exp:con	0.222824	HMDB0175535	10,14-dimethyl-2-methylidene-6-[(sulfooxy)methyl]pentadecanoic acid	n/a	C19H36O6S	392.223	M+Cl	-	427.193	10	n/a
M427T364_2	2.61049	0.00221726	0.0151515	0.00934362	0.0368461	1.05415	exp:con	0.222824	HMDB0175538	6,14-dimethyl-2-methylidene-10-[(sulfooxy)methyl]pentadecanoic acid	n/a	C19H36O6S	392.223	M+Cl	-	427.193	10	n/a
M427T364_2	2.61049	0.00221726	0.0151515	0.00934362	0.0368461	1.05415	exp:con	0.222824	HMDB0175541	6,10,14-trimethyl-2-methylidene-15-(sulfooxy)pentadecanoic acid	n/a	C19H36O6S	392.223	M+Cl	-	427.193	10	n/a
M444T66	6.8378	0.00558816	0.025974	0.0181413	0.0560999	1.86888	exp:con	0.191495	HMDB0144188	(12aS)-7-chloro-3,6,10,12,12a-pentahydroxy-4-(methylamino)-1,2,3,4,4a,5,5a,6,11,12a-decahydrotetracene-1,11-dione	n/a	C19H20ClNO7	409.093	M+Cl	-	444.062	9	n/a
M444T66	6.8378	0.00558816	0.025974	0.0181413	0.0560999	1.86888	exp:con	0.191495	HMDB0144190	(12aR)-7-chloro-3,6,10,12a-tetrahydroxy-4-(methylamino)-1,2,3,4,4a,5,5a,6,11,11a,12,12a-dodecahydrotetracene-1,11,12-trione	n/a	C19H20ClNO7	409.093	M+Cl	-	444.062	9	n/a
M444T66	6.8378	0.00558816	0.025974	0.0181413	0.0560999	1.86888	exp:con	0.191495	HMDB0144191	(12aS)-7-chloro-6,10,12,12a-tetrahydroxy-4-(methylamino)-1,2,3,4,4a,5,5a,6,11,11a,12,12a-dodecahydrotetracene-1,3,11-trione	n/a	C19H20ClNO7	409.093	M+Cl	-	444.062	9	n/a
M465T194	4.90585	0.000214302	0.0021645	0.00189988	0.0078766	1.93633	exp:con	2.02e-12	HMDB0139431	(4-{5-hydroxy-2-oxa-6,11-diazatetracyclo[7.5.2.0⁴,¹⁵.0¹²,¹⁶]hexadeca-1(15),5,9,12(16),13-pentaen-3-yl}-2-methoxyphenyl)oxidanesulfonic acid	n/a	C20H18N2O7S	430.083	M+Cl	-	465.053	1	n/a
M465T194	4.90585	0.000214302	0.0021645	0.00189988	0.0078766	1.93633	exp:con	2.02e-12	HMDB0041340	Benzofenap	C18555	C22H20Cl2N2O3	430.085	M+Cl	-	465.055	4	n/a
M483T136	6.83629	1.65e-07	0.0021645	2.91e-05	0.0078766	2.13106	exp:con	0.12532	HMDB0141958	3,4,5-trihydroxy-6-{3-[(1E)-3-oxo-3-(2,4,6-trihydroxyphenyl)prop-1-en-1-yl]phenoxy}oxane-2-carboxylic acid	n/a	C21H20O11	448.101	M+Cl	-	483.07	5	n/a
M483T136	6.83629	1.65e-07	0.0021645	2.91e-05	0.0078766	2.13106	exp:con	0.12532	HMDB0138107	6-({5,14-dihydroxy-8,17-dioxatetracyclo[8.7.0.0²,⁷.0¹¹,¹⁶]heptadeca-2(7),3,5,11,13,15-hexaen-13-yl}oxy)-3,4,5-trihydroxyoxane-2-carboxylic acid	n/a	C21H20O11	448.101	M+Cl	-	483.07	5	n/a
M483T136	6.83629	1.65e-07	0.0021645	2.91e-05	0.0078766	2.13106	exp:con	0.12532	HMDB0137604	3,4,5-trihydroxy-6-{3-hydroxy-4-[(6-hydroxy-3-oxo-2,3-dihydro-1-benzofuran-2-yl)methyl]phenoxy}oxane-2-carboxylic acid	n/a	C21H20O11	448.101	M+Cl	-	483.07	5	n/a
M483T136	6.83629	1.65e-07	0.0021645	2.91e-05	0.0078766	2.13106	exp:con	0.12532	HMDB0137602	3,4,5-trihydroxy-6-{5-hydroxy-2-[(6-hydroxy-3-oxo-2,3-dihydro-1-benzofuran-2-yl)methyl]phenoxy}oxane-2-carboxylic acid	n/a	C21H20O11	448.101	M+Cl	-	483.07	5	n/a
M483T136	6.83629	1.65e-07	0.0021645	2.91e-05	0.0078766	2.13106	exp:con	0.12532	HMDB0137603	6-({2-[(2,4-dihydroxyphenyl)methyl]-3-oxo-2,3-dihydro-1-benzofuran-6-yl}oxy)-3,4,5-trihydroxyoxane-2-carboxylic acid	n/a	C21H20O11	448.101	M+Cl	-	483.07	5	n/a
M483T136	6.83629	1.65e-07	0.0021645	2.91e-05	0.0078766	2.13106	exp:con	0.12532	HMDB0137594	3,4,5-trihydroxy-6-{2-hydroxy-5-[(6-hydroxy-3-oxo-2,3-dihydro-1-benzofuran-2-yl)methyl]phenoxy}oxane-2-carboxylic acid	n/a	C21H20O11	448.101	M+Cl	-	483.07	5	n/a
M483T136	6.83629	1.65e-07	0.0021645	2.91e-05	0.0078766	2.13106	exp:con	0.12532	HMDB0137595	6-({2-[(3,4-dihydroxyphenyl)methyl]-3-oxo-2,3-dihydro-1-benzofuran-6-yl}oxy)-3,4,5-trihydroxyoxane-2-carboxylic acid	n/a	C21H20O11	448.101	M+Cl	-	483.07	5	n/a
M483T136	6.83629	1.65e-07	0.0021645	2.91e-05	0.0078766	2.13106	exp:con	0.12532	HMDB0137596	3,4,5-trihydroxy-6-{2-hydroxy-4-[(6-hydroxy-3-oxo-2,3-dihydro-1-benzofuran-2-yl)methyl]phenoxy}oxane-2-carboxylic acid	n/a	C21H20O11	448.101	M+Cl	-	483.07	5	n/a
M483T136	6.83629	1.65e-07	0.0021645	2.91e-05	0.0078766	2.13106	exp:con	0.12532	HMDB0137586	3,4,5-trihydroxy-6-({4-hydroxy-2-[(4-hydroxyphenyl)methyl]-3-oxo-2,3-dihydro-1-benzofuran-6-yl}oxy)oxane-2-carboxylic acid	n/a	C21H20O11	448.101	M+Cl	-	483.07	5	n/a
M483T136	6.83629	1.65e-07	0.0021645	2.91e-05	0.0078766	2.13106	exp:con	0.12532	HMDB0137587	6-{4-[(4,6-dihydroxy-3-oxo-2,3-dihydro-1-benzofuran-2-yl)methyl]phenoxy}-3,4,5-trihydroxyoxane-2-carboxylic acid	n/a	C21H20O11	448.101	M+Cl	-	483.07	5	n/a
M483T136	6.83629	1.65e-07	0.0021645	2.91e-05	0.0078766	2.13106	exp:con	0.12532	HMDB0137585	3,4,5-trihydroxy-6-({6-hydroxy-2-[(4-hydroxyphenyl)methyl]-3-oxo-2,3-dihydro-1-benzofuran-4-yl}oxy)oxane-2-carboxylic acid	n/a	C21H20O11	448.101	M+Cl	-	483.07	5	n/a
M483T136	6.83629	1.65e-07	0.0021645	2.91e-05	0.0078766	2.13106	exp:con	0.12532	HMDB0137578	3,4,5-trihydroxy-6-({7-hydroxy-2-[(4-hydroxyphenyl)methyl]-3-oxo-2,3-dihydro-1-benzofuran-6-yl}oxy)oxane-2-carboxylic acid	n/a	C21H20O11	448.101	M+Cl	-	483.07	5	n/a
M483T136	6.83629	1.65e-07	0.0021645	2.91e-05	0.0078766	2.13106	exp:con	0.12532	HMDB0137579	6-{4-[(6,7-dihydroxy-3-oxo-2,3-dihydro-1-benzofuran-2-yl)methyl]phenoxy}-3,4,5-trihydroxyoxane-2-carboxylic acid	n/a	C21H20O11	448.101	M+Cl	-	483.07	5	n/a
M483T136	6.83629	1.65e-07	0.0021645	2.91e-05	0.0078766	2.13106	exp:con	0.12532	HMDB0137577	3,4,5-trihydroxy-6-({6-hydroxy-2-[(4-hydroxyphenyl)methyl]-3-oxo-2,3-dihydro-1-benzofuran-7-yl}oxy)oxane-2-carboxylic acid	n/a	C21H20O11	448.101	M+Cl	-	483.07	5	n/a
M483T136	6.83629	1.65e-07	0.0021645	2.91e-05	0.0078766	2.13106	exp:con	0.12532	HMDB0137571	6-{4-[(5,6-dihydroxy-3-oxo-2,3-dihydro-1-benzofuran-2-yl)methyl]phenoxy}-3,4,5-trihydroxyoxane-2-carboxylic acid	n/a	C21H20O11	448.101	M+Cl	-	483.07	5	n/a
M483T136	6.83629	1.65e-07	0.0021645	2.91e-05	0.0078766	2.13106	exp:con	0.12532	HMDB0137570	3,4,5-trihydroxy-6-({5-hydroxy-2-[(4-hydroxyphenyl)methyl]-3-oxo-2,3-dihydro-1-benzofuran-6-yl}oxy)oxane-2-carboxylic acid	n/a	C21H20O11	448.101	M+Cl	-	483.07	5	n/a
M483T136	6.83629	1.65e-07	0.0021645	2.91e-05	0.0078766	2.13106	exp:con	0.12532	HMDB0138108	6-({5,13-dihydroxy-8,17-dioxatetracyclo[8.7.0.0²,⁷.0¹¹,¹⁶]heptadeca-2(7),3,5,11,13,15-hexaen-14-yl}oxy)-3,4,5-trihydroxyoxane-2-carboxylic acid	n/a	C21H20O11	448.101	M+Cl	-	483.07	5	n/a
M483T136	6.83629	1.65e-07	0.0021645	2.91e-05	0.0078766	2.13106	exp:con	0.12532	HMDB0138106	6-({13,14-dihydroxy-8,17-dioxatetracyclo[8.7.0.0²,⁷.0¹¹,¹⁶]heptadeca-2(7),3,5,11(16),12,14-hexaen-5-yl}oxy)-3,4,5-trihydroxyoxane-2-carboxylic acid	n/a	C21H20O11	448.101	M+Cl	-	483.07	5	n/a
M483T136	6.83629	1.65e-07	0.0021645	2.91e-05	0.0078766	2.13106	exp:con	0.12532	HMDB0141957	6-{3,5-dihydroxy-2-[(2E)-3-(3-hydroxyphenyl)prop-2-enoyl]phenoxy}-3,4,5-trihydroxyoxane-2-carboxylic acid	n/a	C21H20O11	448.101	M+Cl	-	483.07	5	n/a
M483T136	6.83629	1.65e-07	0.0021645	2.91e-05	0.0078766	2.13106	exp:con	0.12532	HMDB0141339	3,4,5-trihydroxy-6-{[(2S)-7-hydroxy-2-(4-hydroxyphenyl)-4-oxo-3,4-dihydro-2H-1-benzopyran-5-yl]oxy}oxane-2-carboxylic acid	n/a	C21H20O11	448.101	M+Cl	-	483.07	5	n/a
M483T136	6.83629	1.65e-07	0.0021645	2.91e-05	0.0078766	2.13106	exp:con	0.12532	HMDB0141340	3,4,5-trihydroxy-6-{[(2S)-5-hydroxy-2-(4-hydroxyphenyl)-4-oxo-3,4-dihydro-2H-1-benzopyran-7-yl]oxy}oxane-2-carboxylic acid	n/a	C21H20O11	448.101	M+Cl	-	483.07	5	n/a
M483T136	6.83629	1.65e-07	0.0021645	2.91e-05	0.0078766	2.13106	exp:con	0.12532	HMDB0141338	6-{4-[(2S)-5,7-dihydroxy-4-oxo-3,4-dihydro-2H-1-benzopyran-2-yl]phenoxy}-3,4,5-trihydroxyoxane-2-carboxylic acid	n/a	C21H20O11	448.101	M+Cl	-	483.07	5	n/a
M483T136	6.83629	1.65e-07	0.0021645	2.91e-05	0.0078766	2.13106	exp:con	0.12532	HMDB0141191	6-{3,5-dihydroxy-4-[3-(3-hydroxyphenyl)prop-2-enoyl]phenoxy}-3,4,5-trihydroxyoxane-2-carboxylic acid	n/a	C21H20O11	448.101	M+Cl	-	483.07	5	n/a
M483T136	6.83629	1.65e-07	0.0021645	2.91e-05	0.0078766	2.13106	exp:con	0.12532	HMDB0141190	6-{3,5-dihydroxy-2-[3-(3-hydroxyphenyl)prop-2-enoyl]phenoxy}-3,4,5-trihydroxyoxane-2-carboxylic acid	n/a	C21H20O11	448.101	M+Cl	-	483.07	5	n/a
M483T136	6.83629	1.65e-07	0.0021645	2.91e-05	0.0078766	2.13106	exp:con	0.12532	HMDB0141189	3,4,5-trihydroxy-6-{3-[3-oxo-3-(2,4,6-trihydroxyphenyl)prop-1-en-1-yl]phenoxy}oxane-2-carboxylic acid	n/a	C21H20O11	448.101	M+Cl	-	483.07	5	n/a
M483T136	6.83629	1.65e-07	0.0021645	2.91e-05	0.0078766	2.13106	exp:con	0.12532	HMDB0138628	6-{[2-(3,5-dihydroxyphenyl)-5-methoxy-1-benzofuran-6-yl]oxy}-3,4,5-trihydroxyoxane-2-carboxylic acid	n/a	C21H20O11	448.101	M+Cl	-	483.07	5	n/a
M483T136	6.83629	1.65e-07	0.0021645	2.91e-05	0.0078766	2.13106	exp:con	0.12532	HMDB0138627	3,4,5-trihydroxy-6-[3-hydroxy-5-(6-hydroxy-5-methoxy-1-benzofuran-2-yl)phenoxy]oxane-2-carboxylic acid	n/a	C21H20O11	448.101	M+Cl	-	483.07	5	n/a
M483T136	6.83629	1.65e-07	0.0021645	2.91e-05	0.0078766	2.13106	exp:con	0.12532	HMDB0138616	3,4,5-trihydroxy-6-{[4-hydroxy-2-(3-hydroxyphenyl)-6-methoxy-1-benzofuran-5-yl]oxy}oxane-2-carboxylic acid	n/a	C21H20O11	448.101	M+Cl	-	483.07	5	n/a
M483T136	6.83629	1.65e-07	0.0021645	2.91e-05	0.0078766	2.13106	exp:con	0.12532	HMDB0138612	3,4,5-trihydroxy-6-{[7-hydroxy-2-(3-hydroxyphenyl)-6-methoxy-1-benzofuran-5-yl]oxy}oxane-2-carboxylic acid	n/a	C21H20O11	448.101	M+Cl	-	483.07	5	n/a
M483T136	6.83629	1.65e-07	0.0021645	2.91e-05	0.0078766	2.13106	exp:con	0.12532	HMDB0138614	3,4,5-trihydroxy-6-{[5-hydroxy-2-(3-hydroxyphenyl)-6-methoxy-1-benzofuran-4-yl]oxy}oxane-2-carboxylic acid	n/a	C21H20O11	448.101	M+Cl	-	483.07	5	n/a
M483T136	6.83629	1.65e-07	0.0021645	2.91e-05	0.0078766	2.13106	exp:con	0.12532	HMDB0138615	6-[3-(4,5-dihydroxy-6-methoxy-1-benzofuran-2-yl)phenoxy]-3,4,5-trihydroxyoxane-2-carboxylic acid	n/a	C21H20O11	448.101	M+Cl	-	483.07	5	n/a
M483T136	6.83629	1.65e-07	0.0021645	2.91e-05	0.0078766	2.13106	exp:con	0.12532	HMDB0138611	6-[3-(5,7-dihydroxy-6-methoxy-1-benzofuran-2-yl)phenoxy]-3,4,5-trihydroxyoxane-2-carboxylic acid	n/a	C21H20O11	448.101	M+Cl	-	483.07	5	n/a
M483T136	6.83629	1.65e-07	0.0021645	2.91e-05	0.0078766	2.13106	exp:con	0.12532	HMDB0138610	3,4,5-trihydroxy-6-{[5-hydroxy-2-(3-hydroxyphenyl)-6-methoxy-1-benzofuran-7-yl]oxy}oxane-2-carboxylic acid	n/a	C21H20O11	448.101	M+Cl	-	483.07	5	n/a
M483T136	6.83629	1.65e-07	0.0021645	2.91e-05	0.0078766	2.13106	exp:con	0.12532	HMDB0134898	6-[(6,7-dihydroxy-4-oxo-2-phenyl-3,4-dihydro-2H-1-benzopyran-5-yl)oxy]-3,4,5-trihydroxyoxane-2-carboxylic acid	n/a	C21H20O11	448.101	M+Cl	-	483.07	5	n/a
M483T136	6.83629	1.65e-07	0.0021645	2.91e-05	0.0078766	2.13106	exp:con	0.12532	HMDB0134899	6-[(5,7-dihydroxy-4-oxo-2-phenyl-3,4-dihydro-2H-1-benzopyran-6-yl)oxy]-3,4,5-trihydroxyoxane-2-carboxylic acid	n/a	C21H20O11	448.101	M+Cl	-	483.07	5	n/a
M483T136	6.83629	1.65e-07	0.0021645	2.91e-05	0.0078766	2.13106	exp:con	0.12532	HMDB0130785	6-[2-(5,7-dihydroxy-4-oxo-3,4-dihydro-2H-1-benzopyran-3-yl)phenoxy]-3,4,5-trihydroxyoxane-2-carboxylic acid	n/a	C21H20O11	448.101	M+Cl	-	483.07	5	n/a
M483T136	6.83629	1.65e-07	0.0021645	2.91e-05	0.0078766	2.13106	exp:con	0.12532	HMDB0130788	6-[3-(5,7-dihydroxy-4-oxo-3,4-dihydro-2H-1-benzopyran-3-yl)phenoxy]-3,4,5-trihydroxyoxane-2-carboxylic acid	n/a	C21H20O11	448.101	M+Cl	-	483.07	5	n/a
M483T136	6.83629	1.65e-07	0.0021645	2.91e-05	0.0078766	2.13106	exp:con	0.12532	HMDB0130248	3,4,5-trihydroxy-6-[2,3,5-trihydroxy-6-(3-phenylprop-2-enoyl)phenoxy]oxane-2-carboxylic acid	n/a	C21H20O11	448.101	M+Cl	-	483.07	5	n/a
M483T136	6.83629	1.65e-07	0.0021645	2.91e-05	0.0078766	2.13106	exp:con	0.12532	HMDB0130245	3,4,5-trihydroxy-6-[3,4,5-trihydroxy-2-(3-phenylprop-2-enoyl)phenoxy]oxane-2-carboxylic acid	n/a	C21H20O11	448.101	M+Cl	-	483.07	5	n/a
M483T136	6.83629	1.65e-07	0.0021645	2.91e-05	0.0078766	2.13106	exp:con	0.12532	HMDB0130247	3,4,5-trihydroxy-6-[2,4,6-trihydroxy-3-(3-phenylprop-2-enoyl)phenoxy]oxane-2-carboxylic acid	n/a	C21H20O11	448.101	M+Cl	-	483.07	5	n/a
M483T136	6.83629	1.65e-07	0.0021645	2.91e-05	0.0078766	2.13106	exp:con	0.12532	HMDB0130246	3,4,5-trihydroxy-6-[2,3,5-trihydroxy-4-(3-phenylprop-2-enoyl)phenoxy]oxane-2-carboxylic acid	n/a	C21H20O11	448.101	M+Cl	-	483.07	5	n/a
M483T136	6.83629	1.65e-07	0.0021645	2.91e-05	0.0078766	2.13106	exp:con	0.12532	HMDB0130214	6-[(7,8-dihydroxy-4-oxo-2-phenyl-3,4-dihydro-2H-1-benzopyran-5-yl)oxy]-3,4,5-trihydroxyoxane-2-carboxylic acid	n/a	C21H20O11	448.101	M+Cl	-	483.07	5	n/a
M483T136	6.83629	1.65e-07	0.0021645	2.91e-05	0.0078766	2.13106	exp:con	0.12532	HMDB0130215	6-[(5,8-dihydroxy-4-oxo-2-phenyl-3,4-dihydro-2H-1-benzopyran-7-yl)oxy]-3,4,5-trihydroxyoxane-2-carboxylic acid	n/a	C21H20O11	448.101	M+Cl	-	483.07	5	n/a
M483T136	6.83629	1.65e-07	0.0021645	2.91e-05	0.0078766	2.13106	exp:con	0.12532	HMDB0130012	6-[(6,7-dihydroxy-4-oxo-3-phenyl-3,4-dihydro-2H-1-benzopyran-5-yl)oxy]-3,4,5-trihydroxyoxane-2-carboxylic acid	n/a	C21H20O11	448.101	M+Cl	-	483.07	5	n/a
M483T136	6.83629	1.65e-07	0.0021645	2.91e-05	0.0078766	2.13106	exp:con	0.12532	HMDB0130013	6-[(5,6-dihydroxy-4-oxo-3-phenyl-3,4-dihydro-2H-1-benzopyran-7-yl)oxy]-3,4,5-trihydroxyoxane-2-carboxylic acid	n/a	C21H20O11	448.101	M+Cl	-	483.07	5	n/a
M483T136	6.83629	1.65e-07	0.0021645	2.91e-05	0.0078766	2.13106	exp:con	0.12532	HMDB0130011	6-[(5,7-dihydroxy-4-oxo-3-phenyl-3,4-dihydro-2H-1-benzopyran-6-yl)oxy]-3,4,5-trihydroxyoxane-2-carboxylic acid	n/a	C21H20O11	448.101	M+Cl	-	483.07	5	n/a
M483T136	6.83629	1.65e-07	0.0021645	2.91e-05	0.0078766	2.13106	exp:con	0.12532	HMDB0129978	3,4,5-trihydroxy-6-{[5-hydroxy-3-(4-hydroxyphenyl)-4-oxo-3,4-dihydro-2H-1-benzopyran-7-yl]oxy}oxane-2-carboxylic acid	n/a	C21H20O11	448.101	M+Cl	-	483.07	5	n/a
M483T136	6.83629	1.65e-07	0.0021645	2.91e-05	0.0078766	2.13106	exp:con	0.12532	HMDB0129979	6-[4-(5,7-dihydroxy-4-oxo-3,4-dihydro-2H-1-benzopyran-3-yl)phenoxy]-3,4,5-trihydroxyoxane-2-carboxylic acid	n/a	C21H20O11	448.101	M+Cl	-	483.07	5	n/a
M483T136	6.83629	1.65e-07	0.0021645	2.91e-05	0.0078766	2.13106	exp:con	0.12532	HMDB0129977	3,4,5-trihydroxy-6-{[7-hydroxy-3-(4-hydroxyphenyl)-4-oxo-3,4-dihydro-2H-1-benzopyran-5-yl]oxy}oxane-2-carboxylic acid	n/a	C21H20O11	448.101	M+Cl	-	483.07	5	n/a
M483T136	6.83629	1.65e-07	0.0021645	2.91e-05	0.0078766	2.13106	exp:con	0.12532	HMDB0129299	5,6,7-trihydroxy-2-(3-hydroxyphenyl)-8-[3,4,5-trihydroxy-6-(hydroxymethyl)oxan-2-yl]-4H-chromen-4-one	n/a	C21H20O11	448.101	M+Cl	-	483.07	5	n/a
M483T136	6.83629	1.65e-07	0.0021645	2.91e-05	0.0078766	2.13106	exp:con	0.12532	HMDB0130786	3,4,5-trihydroxy-6-{[7-hydroxy-3-(2-hydroxyphenyl)-4-oxo-3,4-dihydro-2H-1-benzopyran-5-yl]oxy}oxane-2-carboxylic acid	n/a	C21H20O11	448.101	M+Cl	-	483.07	5	n/a
M483T136	6.83629	1.65e-07	0.0021645	2.91e-05	0.0078766	2.13106	exp:con	0.12532	HMDB0130787	3,4,5-trihydroxy-6-{[5-hydroxy-3-(2-hydroxyphenyl)-4-oxo-3,4-dihydro-2H-1-benzopyran-7-yl]oxy}oxane-2-carboxylic acid	n/a	C21H20O11	448.101	M+Cl	-	483.07	5	n/a
M483T136	6.83629	1.65e-07	0.0021645	2.91e-05	0.0078766	2.13106	exp:con	0.12532	HMDB0134901	3,4,5-trihydroxy-6-{2,3,5-trihydroxy-4-[(2E)-3-phenylprop-2-enoyl]phenoxy}oxane-2-carboxylic acid	n/a	C21H20O11	448.101	M+Cl	-	483.07	5	n/a
M483T136	6.83629	1.65e-07	0.0021645	2.91e-05	0.0078766	2.13106	exp:con	0.12532	HMDB0134577	6-[4-(5,8-dihydroxy-4-oxo-3,4-dihydro-2H-1-benzopyran-2-yl)phenoxy]-3,4,5-trihydroxyoxane-2-carboxylic acid	n/a	C21H20O11	448.101	M+Cl	-	483.07	5	n/a
M483T136	6.83629	1.65e-07	0.0021645	2.91e-05	0.0078766	2.13106	exp:con	0.12532	HMDB0134576	3,4,5-trihydroxy-6-{[8-hydroxy-2-(4-hydroxyphenyl)-4-oxo-3,4-dihydro-2H-1-benzopyran-5-yl]oxy}oxane-2-carboxylic acid	n/a	C21H20O11	448.101	M+Cl	-	483.07	5	n/a
M483T136	6.83629	1.65e-07	0.0021645	2.91e-05	0.0078766	2.13106	exp:con	0.12532	HMDB0133579	6-[(2-benzyl-2,4-dihydroxy-3-oxo-2,3-dihydro-1-benzofuran-6-yl)oxy]-3,4,5-trihydroxyoxane-2-carboxylic acid	n/a	C21H20O11	448.101	M+Cl	-	483.07	5	n/a
M483T136	6.83629	1.65e-07	0.0021645	2.91e-05	0.0078766	2.13106	exp:con	0.12532	HMDB0133578	6-[(2-benzyl-2,6-dihydroxy-3-oxo-2,3-dihydro-1-benzofuran-4-yl)oxy]-3,4,5-trihydroxyoxane-2-carboxylic acid	n/a	C21H20O11	448.101	M+Cl	-	483.07	5	n/a
M483T136	6.83629	1.65e-07	0.0021645	2.91e-05	0.0078766	2.13106	exp:con	0.12532	HMDB0133386	6-[3-(5,7-dihydroxy-4-oxo-3,4-dihydro-2H-1-benzopyran-2-yl)phenoxy]-3,4,5-trihydroxyoxane-2-carboxylic acid	n/a	C21H20O11	448.101	M+Cl	-	483.07	5	n/a
M483T136	6.83629	1.65e-07	0.0021645	2.91e-05	0.0078766	2.13106	exp:con	0.12532	HMDB0133385	3,4,5-trihydroxy-6-{[5-hydroxy-2-(3-hydroxyphenyl)-4-oxo-3,4-dihydro-2H-1-benzopyran-7-yl]oxy}oxane-2-carboxylic acid	n/a	C21H20O11	448.101	M+Cl	-	483.07	5	n/a
M483T136	6.83629	1.65e-07	0.0021645	2.91e-05	0.0078766	2.13106	exp:con	0.12532	HMDB0133384	3,4,5-trihydroxy-6-{[7-hydroxy-2-(3-hydroxyphenyl)-4-oxo-3,4-dihydro-2H-1-benzopyran-5-yl]oxy}oxane-2-carboxylic acid	n/a	C21H20O11	448.101	M+Cl	-	483.07	5	n/a
M483T136	6.83629	1.65e-07	0.0021645	2.91e-05	0.0078766	2.13106	exp:con	0.12532	HMDB0131733	3,4,5-trihydroxy-6-[3-hydroxy-5-(5-hydroxy-6-methoxy-1-benzofuran-2-yl)phenoxy]oxane-2-carboxylic acid	n/a	C21H20O11	448.101	M+Cl	-	483.07	5	n/a
M483T136	6.83629	1.65e-07	0.0021645	2.91e-05	0.0078766	2.13106	exp:con	0.12532	HMDB0131731	6-[3-(5,6-dihydroxy-1-benzofuran-2-yl)-5-methoxyphenoxy]-3,4,5-trihydroxyoxane-2-carboxylic acid	n/a	C21H20O11	448.101	M+Cl	-	483.07	5	n/a
M483T136	6.83629	1.65e-07	0.0021645	2.91e-05	0.0078766	2.13106	exp:con	0.12532	HMDB0131732	6-{[2-(3,5-dihydroxyphenyl)-6-methoxy-1-benzofuran-5-yl]oxy}-3,4,5-trihydroxyoxane-2-carboxylic acid	n/a	C21H20O11	448.101	M+Cl	-	483.07	5	n/a
M483T136	6.83629	1.65e-07	0.0021645	2.91e-05	0.0078766	2.13106	exp:con	0.12532	HMDB0131730	3,4,5-trihydroxy-6-{[6-hydroxy-2-(3-hydroxy-5-methoxyphenyl)-1-benzofuran-5-yl]oxy}oxane-2-carboxylic acid	n/a	C21H20O11	448.101	M+Cl	-	483.07	5	n/a
M483T136	6.83629	1.65e-07	0.0021645	2.91e-05	0.0078766	2.13106	exp:con	0.12532	HMDB0131729	3,4,5-trihydroxy-6-{[5-hydroxy-2-(3-hydroxy-5-methoxyphenyl)-1-benzofuran-6-yl]oxy}oxane-2-carboxylic acid	n/a	C21H20O11	448.101	M+Cl	-	483.07	5	n/a
M483T136	6.83629	1.65e-07	0.0021645	2.91e-05	0.0078766	2.13106	exp:con	0.12532	HMDB0130790	3,4,5-trihydroxy-6-{[5-hydroxy-3-(3-hydroxyphenyl)-4-oxo-3,4-dihydro-2H-1-benzopyran-7-yl]oxy}oxane-2-carboxylic acid	n/a	C21H20O11	448.101	M+Cl	-	483.07	5	n/a
M483T136	6.83629	1.65e-07	0.0021645	2.91e-05	0.0078766	2.13106	exp:con	0.12532	HMDB0130789	3,4,5-trihydroxy-6-{[7-hydroxy-3-(3-hydroxyphenyl)-4-oxo-3,4-dihydro-2H-1-benzopyran-5-yl]oxy}oxane-2-carboxylic acid	n/a	C21H20O11	448.101	M+Cl	-	483.07	5	n/a
M483T136	6.83629	1.65e-07	0.0021645	2.91e-05	0.0078766	2.13106	exp:con	0.12532	HMDB0128105	6-{3,5-dihydroxy-2-[(2E)-3-(4-hydroxyphenyl)prop-2-enoyl]phenoxy}-3,4,5-trihydroxyoxane-2-carboxylic acid	n/a	C21H20O11	448.101	M+Cl	-	483.07	5	n/a
M483T136	6.83629	1.65e-07	0.0021645	2.91e-05	0.0078766	2.13106	exp:con	0.12532	HMDB0166459	3,4,5-trihydroxy-6-[(2,8,9-trihydroxy-3-methyl-10-oxo-9,10-dihydroanthracen-1-yl)oxy]oxane-2-carboxylic acid	n/a	C21H20O11	448.101	M+Cl	-	483.07	5	n/a
M483T136	6.83629	1.65e-07	0.0021645	2.91e-05	0.0078766	2.13106	exp:con	0.12532	HMDB0166454	3,4,5-trihydroxy-6-[(1,8,10-trihydroxy-3-methyl-9-oxo-9,10-dihydroanthracen-2-yl)oxy]oxane-2-carboxylic acid	n/a	C21H20O11	448.101	M+Cl	-	483.07	5	n/a
M483T136	6.83629	1.65e-07	0.0021645	2.91e-05	0.0078766	2.13106	exp:con	0.12532	HMDB0166457	3,4,5-trihydroxy-6-[(7,8,9-trihydroxy-6-methyl-10-oxo-9,10-dihydroanthracen-1-yl)oxy]oxane-2-carboxylic acid	n/a	C21H20O11	448.101	M+Cl	-	483.07	5	n/a
M483T136	6.83629	1.65e-07	0.0021645	2.91e-05	0.0078766	2.13106	exp:con	0.12532	HMDB0166455	3,4,5-trihydroxy-6-[(2,8,10-trihydroxy-3-methyl-9-oxo-9,10-dihydroanthracen-1-yl)oxy]oxane-2-carboxylic acid	n/a	C21H20O11	448.101	M+Cl	-	483.07	5	n/a
M483T136	6.83629	1.65e-07	0.0021645	2.91e-05	0.0078766	2.13106	exp:con	0.12532	HMDB0166453	3,4,5-trihydroxy-6-[(7,8,10-trihydroxy-6-methyl-9-oxo-9,10-dihydroanthracen-1-yl)oxy]oxane-2-carboxylic acid	n/a	C21H20O11	448.101	M+Cl	-	483.07	5	n/a
M483T136	6.83629	1.65e-07	0.0021645	2.91e-05	0.0078766	2.13106	exp:con	0.12532	HMDB0154230	5,7-dihydroxy-2-(4-hydroxy-3-methoxyphenyl)-6-[(3,4,5-trihydroxyoxan-2-yl)oxy]-4H-chromen-4-one	n/a	C21H20O11	448.101	M+Cl	-	483.07	5	n/a
M483T136	6.83629	1.65e-07	0.0021645	2.91e-05	0.0078766	2.13106	exp:con	0.12532	HMDB0152712	6-[(7,8-dihydroxy-4-oxo-3-phenyl-3,4-dihydro-2H-1-benzopyran-6-yl)oxy]-3,4,5-trihydroxyoxane-2-carboxylic acid	n/a	C21H20O11	448.101	M+Cl	-	483.07	5	n/a
M483T136	6.83629	1.65e-07	0.0021645	2.91e-05	0.0078766	2.13106	exp:con	0.12532	HMDB0152710	6-[(6,7-dihydroxy-4-oxo-3-phenyl-3,4-dihydro-2H-1-benzopyran-8-yl)oxy]-3,4,5-trihydroxyoxane-2-carboxylic acid	n/a	C21H20O11	448.101	M+Cl	-	483.07	5	n/a
M483T136	6.83629	1.65e-07	0.0021645	2.91e-05	0.0078766	2.13106	exp:con	0.12532	HMDB0152711	6-[(6,8-dihydroxy-4-oxo-3-phenyl-3,4-dihydro-2H-1-benzopyran-7-yl)oxy]-3,4,5-trihydroxyoxane-2-carboxylic acid	n/a	C21H20O11	448.101	M+Cl	-	483.07	5	n/a
M483T136	6.83629	1.65e-07	0.0021645	2.91e-05	0.0078766	2.13106	exp:con	0.12532	HMDB0152660	3,4,5-trihydroxy-6-{[7-hydroxy-3-(3-hydroxyphenyl)-4-oxo-3,4-dihydro-2H-1-benzopyran-6-yl]oxy}oxane-2-carboxylic acid	n/a	C21H20O11	448.101	M+Cl	-	483.07	5	n/a
M483T136	6.83629	1.65e-07	0.0021645	2.91e-05	0.0078766	2.13106	exp:con	0.12532	HMDB0152658	6-[3-(6,7-dihydroxy-4-oxo-3,4-dihydro-2H-1-benzopyran-3-yl)phenoxy]-3,4,5-trihydroxyoxane-2-carboxylic acid	n/a	C21H20O11	448.101	M+Cl	-	483.07	5	n/a
M483T136	6.83629	1.65e-07	0.0021645	2.91e-05	0.0078766	2.13106	exp:con	0.12532	HMDB0152659	3,4,5-trihydroxy-6-{[6-hydroxy-3-(3-hydroxyphenyl)-4-oxo-3,4-dihydro-2H-1-benzopyran-7-yl]oxy}oxane-2-carboxylic acid	n/a	C21H20O11	448.101	M+Cl	-	483.07	5	n/a
M483T136	6.83629	1.65e-07	0.0021645	2.91e-05	0.0078766	2.13106	exp:con	0.12532	HMDB0152564	3,4,5-trihydroxy-6-{[7-hydroxy-3-(4-hydroxyphenyl)-4-oxo-3,4-dihydro-2H-1-benzopyran-8-yl]oxy}oxane-2-carboxylic acid	n/a	C21H20O11	448.101	M+Cl	-	483.07	5	n/a
M483T136	6.83629	1.65e-07	0.0021645	2.91e-05	0.0078766	2.13106	exp:con	0.12532	HMDB0152566	6-[4-(7,8-dihydroxy-4-oxo-3,4-dihydro-2H-1-benzopyran-3-yl)phenoxy]-3,4,5-trihydroxyoxane-2-carboxylic acid	n/a	C21H20O11	448.101	M+Cl	-	483.07	5	n/a
M483T136	6.83629	1.65e-07	0.0021645	2.91e-05	0.0078766	2.13106	exp:con	0.12532	HMDB0152565	3,4,5-trihydroxy-6-{[8-hydroxy-3-(4-hydroxyphenyl)-4-oxo-3,4-dihydro-2H-1-benzopyran-7-yl]oxy}oxane-2-carboxylic acid	n/a	C21H20O11	448.101	M+Cl	-	483.07	5	n/a
M483T136	6.83629	1.65e-07	0.0021645	2.91e-05	0.0078766	2.13106	exp:con	0.12532	HMDB0166458	3,4,5-trihydroxy-6-[(1,8,9-trihydroxy-3-methyl-10-oxo-9,10-dihydroanthracen-2-yl)oxy]oxane-2-carboxylic acid	n/a	C21H20O11	448.101	M+Cl	-	483.07	5	n/a
M483T136	6.83629	1.65e-07	0.0021645	2.91e-05	0.0078766	2.13106	exp:con	0.12532	HMDB0167799	6-(2-{[(7E)-7-(hexa-2,4-diyn-1-ylidene)-1,6-dioxaspiro[4.4]nona-2,8-dien-4-yl]oxy}-2-oxoethoxy)-3,4,5-trihydroxyoxane-2-carboxylic acid	n/a	C21H20O11	448.101	M+Cl	-	483.07	5	n/a
M483T136	6.83629	1.65e-07	0.0021645	2.91e-05	0.0078766	2.13106	exp:con	0.12532	HMDB0177371	3,4,5-trihydroxy-6-({10-hydroxy-8-methoxy-2-methyl-4-oxo-4H-benzo[h]chromen-5-yl}oxy)oxane-2-carboxylic acid	n/a	C21H20O11	448.101	M+Cl	-	483.07	5	n/a
M483T136	6.83629	1.65e-07	0.0021645	2.91e-05	0.0078766	2.13106	exp:con	0.12532	HMDB0177372	3,4,5-trihydroxy-6-({5-hydroxy-8-methoxy-2-methyl-4-oxo-4H-benzo[h]chromen-10-yl}oxy)oxane-2-carboxylic acid	n/a	C21H20O11	448.101	M+Cl	-	483.07	5	n/a
M483T136	6.83629	1.65e-07	0.0021645	2.91e-05	0.0078766	2.13106	exp:con	0.12532	HMDB0176664	3,4,5-trihydroxy-6-({5-hydroxy-8-methoxy-2-methyl-4-oxo-4H-benzo[g]chromen-6-yl}oxy)oxane-2-carboxylic acid	n/a	C21H20O11	448.101	M+Cl	-	483.07	5	n/a
M483T136	6.83629	1.65e-07	0.0021645	2.91e-05	0.0078766	2.13106	exp:con	0.12532	HMDB0176663	3,4,5-trihydroxy-6-({6-hydroxy-8-methoxy-2-methyl-4-oxo-4H-benzo[g]chromen-5-yl}oxy)oxane-2-carboxylic acid	n/a	C21H20O11	448.101	M+Cl	-	483.07	5	n/a
M483T136	6.83629	1.65e-07	0.0021645	2.91e-05	0.0078766	2.13106	exp:con	0.12532	HMDB0174517	3,4,5-trihydroxy-6-[(4,7,9-trihydroxy-6-methyl-10-oxo-9,10-dihydroanthracen-1-yl)oxy]oxane-2-carboxylic acid	n/a	C21H20O11	448.101	M+Cl	-	483.07	5	n/a
M483T136	6.83629	1.65e-07	0.0021645	2.91e-05	0.0078766	2.13106	exp:con	0.12532	HMDB0174518	3,4,5-trihydroxy-6-[(5,8,9-trihydroxy-3-methyl-10-oxo-9,10-dihydroanthracen-2-yl)oxy]oxane-2-carboxylic acid	n/a	C21H20O11	448.101	M+Cl	-	483.07	5	n/a
M483T136	6.83629	1.65e-07	0.0021645	2.91e-05	0.0078766	2.13106	exp:con	0.12532	HMDB0174516	3,4,5-trihydroxy-6-[(4,6,10-trihydroxy-7-methyl-9-oxo-9,10-dihydroanthracen-1-yl)oxy]oxane-2-carboxylic acid	n/a	C21H20O11	448.101	M+Cl	-	483.07	5	n/a
M483T136	6.83629	1.65e-07	0.0021645	2.91e-05	0.0078766	2.13106	exp:con	0.12532	HMDB0174513	3,4,5-trihydroxy-6-[(4,7,10-trihydroxy-6-methyl-9-oxo-9,10-dihydroanthracen-1-yl)oxy]oxane-2-carboxylic acid	n/a	C21H20O11	448.101	M+Cl	-	483.07	5	n/a
M483T136	6.83629	1.65e-07	0.0021645	2.91e-05	0.0078766	2.13106	exp:con	0.12532	HMDB0174512	3,4,5-trihydroxy-6-[(4,6,9-trihydroxy-7-methyl-10-oxo-9,10-dihydroanthracen-1-yl)oxy]oxane-2-carboxylic acid	n/a	C21H20O11	448.101	M+Cl	-	483.07	5	n/a
M483T136	6.83629	1.65e-07	0.0021645	2.91e-05	0.0078766	2.13106	exp:con	0.12532	HMDB0174514	3,4,5-trihydroxy-6-[(5,8,10-trihydroxy-3-methyl-9-oxo-9,10-dihydroanthracen-2-yl)oxy]oxane-2-carboxylic acid	n/a	C21H20O11	448.101	M+Cl	-	483.07	5	n/a
M483T136	6.83629	1.65e-07	0.0021645	2.91e-05	0.0078766	2.13106	exp:con	0.12532	HMDB0167919	6-{[8,9-dihydroxy-6-(hydroxymethyl)-10-oxo-9,10-dihydroanthracen-1-yl]oxy}-3,4,5-trihydroxyoxane-2-carboxylic acid	n/a	C21H20O11	448.101	M+Cl	-	483.07	5	n/a
M483T136	6.83629	1.65e-07	0.0021645	2.91e-05	0.0078766	2.13106	exp:con	0.12532	HMDB0167920	6-{[8,9-dihydroxy-3-(hydroxymethyl)-10-oxo-9,10-dihydroanthracen-1-yl]oxy}-3,4,5-trihydroxyoxane-2-carboxylic acid	n/a	C21H20O11	448.101	M+Cl	-	483.07	5	n/a
M483T136	6.83629	1.65e-07	0.0021645	2.91e-05	0.0078766	2.13106	exp:con	0.12532	HMDB0167916	6-{[8,10-dihydroxy-3-(hydroxymethyl)-9-oxo-9,10-dihydroanthracen-1-yl]oxy}-3,4,5-trihydroxyoxane-2-carboxylic acid	n/a	C21H20O11	448.101	M+Cl	-	483.07	5	n/a
M483T136	6.83629	1.65e-07	0.0021645	2.91e-05	0.0078766	2.13106	exp:con	0.12532	HMDB0167915	6-{[8,10-dihydroxy-6-(hydroxymethyl)-9-oxo-9,10-dihydroanthracen-1-yl]oxy}-3,4,5-trihydroxyoxane-2-carboxylic acid	n/a	C21H20O11	448.101	M+Cl	-	483.07	5	n/a
M483T136	6.83629	1.65e-07	0.0021645	2.91e-05	0.0078766	2.13106	exp:con	0.12532	HMDB0152535	3,5-dihydroxy-2-(4-hydroxy-3-methoxyphenyl)-7-[(3,4,5-trihydroxyoxan-2-yl)oxy]-4H-chromen-4-one	n/a	C21H20O11	448.101	M+Cl	-	483.07	5	n/a
M483T136	6.83629	1.65e-07	0.0021645	2.91e-05	0.0078766	2.13106	exp:con	0.12532	HMDB0151700	6-[4-(3,7-dihydroxy-4-oxo-3,4-dihydro-2H-1-benzopyran-2-yl)phenoxy]-3,4,5-trihydroxyoxane-2-carboxylic acid	n/a	C21H20O11	448.101	M+Cl	-	483.07	5	n/a
M483T136	6.83629	1.65e-07	0.0021645	2.91e-05	0.0078766	2.13106	exp:con	0.12532	HMDB0148397	6-({5,10-dihydroxy-8,17-dioxatetracyclo[8.7.0.0²,⁷.0¹¹,¹⁶]heptadeca-2(7),3,5,11(16),12,14-hexaen-14-yl}oxy)-3,4,5-trihydroxyoxane-2-carboxylic acid	n/a	C21H20O11	448.101	M+Cl	-	483.07	5	n/a
M483T136	6.83629	1.65e-07	0.0021645	2.91e-05	0.0078766	2.13106	exp:con	0.12532	HMDB0147810	3,4,5-trihydroxy-6-[5-hydroxy-2-(6-hydroxy-5-methoxy-1-benzofuran-2-yl)phenoxy]oxane-2-carboxylic acid	n/a	C21H20O11	448.101	M+Cl	-	483.07	5	n/a
M483T136	6.83629	1.65e-07	0.0021645	2.91e-05	0.0078766	2.13106	exp:con	0.12532	HMDB0147811	6-{[2-(2,4-dihydroxyphenyl)-5-methoxy-1-benzofuran-6-yl]oxy}-3,4,5-trihydroxyoxane-2-carboxylic acid	n/a	C21H20O11	448.101	M+Cl	-	483.07	5	n/a
M483T136	6.83629	1.65e-07	0.0021645	2.91e-05	0.0078766	2.13106	exp:con	0.12532	HMDB0147809	3,4,5-trihydroxy-6-[3-hydroxy-4-(6-hydroxy-5-methoxy-1-benzofuran-2-yl)phenoxy]oxane-2-carboxylic acid	n/a	C21H20O11	448.101	M+Cl	-	483.07	5	n/a
M483T136	6.83629	1.65e-07	0.0021645	2.91e-05	0.0078766	2.13106	exp:con	0.12532	HMDB0147808	6-{[2-(2,4-dihydroxyphenyl)-6-methoxy-1-benzofuran-5-yl]oxy}-3,4,5-trihydroxyoxane-2-carboxylic acid	n/a	C21H20O11	448.101	M+Cl	-	483.07	5	n/a
M483T136	6.83629	1.65e-07	0.0021645	2.91e-05	0.0078766	2.13106	exp:con	0.12532	HMDB0147806	3,4,5-trihydroxy-6-[3-hydroxy-4-(5-hydroxy-6-methoxy-1-benzofuran-2-yl)phenoxy]oxane-2-carboxylic acid	n/a	C21H20O11	448.101	M+Cl	-	483.07	5	n/a
M483T136	6.83629	1.65e-07	0.0021645	2.91e-05	0.0078766	2.13106	exp:con	0.12532	HMDB0147807	3,4,5-trihydroxy-6-[5-hydroxy-2-(5-hydroxy-6-methoxy-1-benzofuran-2-yl)phenoxy]oxane-2-carboxylic acid	n/a	C21H20O11	448.101	M+Cl	-	483.07	5	n/a
M483T136	6.83629	1.65e-07	0.0021645	2.91e-05	0.0078766	2.13106	exp:con	0.12532	HMDB0147669	6-({5,6-dihydroxy-8,17-dioxatetracyclo[8.7.0.0²,⁷.0¹¹,¹⁶]heptadeca-2(7),3,5,11(16),12,14-hexaen-14-yl}oxy)-3,4,5-trihydroxyoxane-2-carboxylic acid	n/a	C21H20O11	448.101	M+Cl	-	483.07	5	n/a
M483T136	6.83629	1.65e-07	0.0021645	2.91e-05	0.0078766	2.13106	exp:con	0.12532	HMDB0147668	6-({6,14-dihydroxy-8,17-dioxatetracyclo[8.7.0.0²,⁷.0¹¹,¹⁶]heptadeca-2(7),3,5,11(16),12,14-hexaen-5-yl}oxy)-3,4,5-trihydroxyoxane-2-carboxylic acid	n/a	C21H20O11	448.101	M+Cl	-	483.07	5	n/a
M483T136	6.83629	1.65e-07	0.0021645	2.91e-05	0.0078766	2.13106	exp:con	0.12532	HMDB0147667	6-({5,14-dihydroxy-8,17-dioxatetracyclo[8.7.0.0²,⁷.0¹¹,¹⁶]heptadeca-2(7),3,5,11(16),12,14-hexaen-6-yl}oxy)-3,4,5-trihydroxyoxane-2-carboxylic acid	n/a	C21H20O11	448.101	M+Cl	-	483.07	5	n/a
M483T136	6.83629	1.65e-07	0.0021645	2.91e-05	0.0078766	2.13106	exp:con	0.12532	HMDB0147217	3,4,5-trihydroxy-6-[3-hydroxy-4-(7-hydroxy-4-oxo-3,4-dihydro-2H-1-benzopyran-3-yl)phenoxy]oxane-2-carboxylic acid	n/a	C21H20O11	448.101	M+Cl	-	483.07	5	n/a
M483T136	6.83629	1.65e-07	0.0021645	2.91e-05	0.0078766	2.13106	exp:con	0.12532	HMDB0147216	3,4,5-trihydroxy-6-[5-hydroxy-2-(7-hydroxy-4-oxo-3,4-dihydro-2H-1-benzopyran-3-yl)phenoxy]oxane-2-carboxylic acid	n/a	C21H20O11	448.101	M+Cl	-	483.07	5	n/a
M483T136	6.83629	1.65e-07	0.0021645	2.91e-05	0.0078766	2.13106	exp:con	0.12532	HMDB0147215	6-{[3-(2,4-dihydroxyphenyl)-4-oxo-3,4-dihydro-2H-1-benzopyran-7-yl]oxy}-3,4,5-trihydroxyoxane-2-carboxylic acid	n/a	C21H20O11	448.101	M+Cl	-	483.07	5	n/a
M483T136	6.83629	1.65e-07	0.0021645	2.91e-05	0.0078766	2.13106	exp:con	0.12532	HMDB0141979	2-({2-[3,4-bis(2-hydroxyethoxy)phenyl]-3,5-dihydroxy-4-oxo-4H-chromen-7-yl}oxy)acetic acid	n/a	C21H20O11	448.101	M+Cl	-	483.07	5	n/a
M483T136	6.83629	1.65e-07	0.0021645	2.91e-05	0.0078766	2.13106	exp:con	0.12532	HMDB0141978	2-{5-[3,5-dihydroxy-7-(2-hydroxyethoxy)-4-oxo-4H-chromen-2-yl]-2-(2-hydroxyethoxy)phenoxy}acetic acid	n/a	C21H20O11	448.101	M+Cl	-	483.07	5	n/a
M483T136	6.83629	1.65e-07	0.0021645	2.91e-05	0.0078766	2.13106	exp:con	0.12532	HMDB0148396	6-({10,14-dihydroxy-8,17-dioxatetracyclo[8.7.0.0²,⁷.0¹¹,¹⁶]heptadeca-2(7),3,5,11(16),12,14-hexaen-5-yl}oxy)-3,4,5-trihydroxyoxane-2-carboxylic acid	n/a	C21H20O11	448.101	M+Cl	-	483.07	5	n/a
M483T136	6.83629	1.65e-07	0.0021645	2.91e-05	0.0078766	2.13106	exp:con	0.12532	HMDB0148862	3,4,5-trihydroxy-6-({6-hydroxy-2-[(3-hydroxyphenyl)methyl]-3-oxo-2,3-dihydro-1-benzofuran-4-yl}oxy)oxane-2-carboxylic acid	n/a	C21H20O11	448.101	M+Cl	-	483.07	5	n/a
M483T136	6.83629	1.65e-07	0.0021645	2.91e-05	0.0078766	2.13106	exp:con	0.12532	HMDB0151701	3,4,5-trihydroxy-6-{[3-hydroxy-2-(4-hydroxyphenyl)-4-oxo-3,4-dihydro-2H-1-benzopyran-7-yl]oxy}oxane-2-carboxylic acid	n/a	C21H20O11	448.101	M+Cl	-	483.07	5	n/a
M483T136	6.83629	1.65e-07	0.0021645	2.91e-05	0.0078766	2.13106	exp:con	0.12532	HMDB0150658	6-{3,5-dihydroxy-4-[3-(2-hydroxyphenyl)prop-2-enoyl]phenoxy}-3,4,5-trihydroxyoxane-2-carboxylic acid	n/a	C21H20O11	448.101	M+Cl	-	483.07	5	n/a
M483T136	6.83629	1.65e-07	0.0021645	2.91e-05	0.0078766	2.13106	exp:con	0.12532	HMDB0150656	3,4,5-trihydroxy-6-{2-[3-oxo-3-(2,4,6-trihydroxyphenyl)prop-1-en-1-yl]phenoxy}oxane-2-carboxylic acid	n/a	C21H20O11	448.101	M+Cl	-	483.07	5	n/a
M483T136	6.83629	1.65e-07	0.0021645	2.91e-05	0.0078766	2.13106	exp:con	0.12532	HMDB0150655	3,4,5-trihydroxy-6-{[7-hydroxy-2-(2-hydroxyphenyl)-4-oxo-3,4-dihydro-2H-1-benzopyran-5-yl]oxy}oxane-2-carboxylic acid	n/a	C21H20O11	448.101	M+Cl	-	483.07	5	n/a
M483T136	6.83629	1.65e-07	0.0021645	2.91e-05	0.0078766	2.13106	exp:con	0.12532	HMDB0150654	3,4,5-trihydroxy-6-{[5-hydroxy-2-(2-hydroxyphenyl)-4-oxo-3,4-dihydro-2H-1-benzopyran-7-yl]oxy}oxane-2-carboxylic acid	n/a	C21H20O11	448.101	M+Cl	-	483.07	5	n/a
M483T136	6.83629	1.65e-07	0.0021645	2.91e-05	0.0078766	2.13106	exp:con	0.12532	HMDB0150657	6-{3,5-dihydroxy-2-[(2E)-3-(2-hydroxyphenyl)prop-2-enoyl]phenoxy}-3,4,5-trihydroxyoxane-2-carboxylic acid	n/a	C21H20O11	448.101	M+Cl	-	483.07	5	n/a
M483T136	6.83629	1.65e-07	0.0021645	2.91e-05	0.0078766	2.13106	exp:con	0.12532	HMDB0150653	6-[2-(5,7-dihydroxy-4-oxo-3,4-dihydro-2H-1-benzopyran-2-yl)phenoxy]-3,4,5-trihydroxyoxane-2-carboxylic acid	n/a	C21H20O11	448.101	M+Cl	-	483.07	5	n/a
M483T136	6.83629	1.65e-07	0.0021645	2.91e-05	0.0078766	2.13106	exp:con	0.12532	HMDB0150620	3,4,5-trihydroxy-6-[2-hydroxy-4-(7-hydroxy-4-oxo-3,4-dihydro-2H-1-benzopyran-3-yl)phenoxy]oxane-2-carboxylic acid	n/a	C21H20O11	448.101	M+Cl	-	483.07	5	n/a
M483T136	6.83629	1.65e-07	0.0021645	2.91e-05	0.0078766	2.13106	exp:con	0.12532	HMDB0150621	6-{[3-(3,4-dihydroxyphenyl)-4-oxo-3,4-dihydro-2H-1-benzopyran-7-yl]oxy}-3,4,5-trihydroxyoxane-2-carboxylic acid	n/a	C21H20O11	448.101	M+Cl	-	483.07	5	n/a
M483T136	6.83629	1.65e-07	0.0021645	2.91e-05	0.0078766	2.13106	exp:con	0.12532	HMDB0150619	3,4,5-trihydroxy-6-[2-hydroxy-5-(7-hydroxy-4-oxo-3,4-dihydro-2H-1-benzopyran-3-yl)phenoxy]oxane-2-carboxylic acid	n/a	C21H20O11	448.101	M+Cl	-	483.07	5	n/a
M483T136	6.83629	1.65e-07	0.0021645	2.91e-05	0.0078766	2.13106	exp:con	0.12532	HMDB0149621	6-[4-(6,7-dihydroxy-4-oxo-3,4-dihydro-2H-1-benzopyran-3-yl)phenoxy]-3,4,5-trihydroxyoxane-2-carboxylic acid	n/a	C21H20O11	448.101	M+Cl	-	483.07	5	n/a
M483T136	6.83629	1.65e-07	0.0021645	2.91e-05	0.0078766	2.13106	exp:con	0.12532	HMDB0149623	3,4,5-trihydroxy-6-{[7-hydroxy-3-(4-hydroxyphenyl)-4-oxo-3,4-dihydro-2H-1-benzopyran-6-yl]oxy}oxane-2-carboxylic acid	n/a	C21H20O11	448.101	M+Cl	-	483.07	5	n/a
M483T136	6.83629	1.65e-07	0.0021645	2.91e-05	0.0078766	2.13106	exp:con	0.12532	HMDB0149622	3,4,5-trihydroxy-6-{[6-hydroxy-3-(4-hydroxyphenyl)-4-oxo-3,4-dihydro-2H-1-benzopyran-7-yl]oxy}oxane-2-carboxylic acid	n/a	C21H20O11	448.101	M+Cl	-	483.07	5	n/a
M483T136	6.83629	1.65e-07	0.0021645	2.91e-05	0.0078766	2.13106	exp:con	0.12532	HMDB0148863	3,4,5-trihydroxy-6-({4-hydroxy-2-[(3-hydroxyphenyl)methyl]-3-oxo-2,3-dihydro-1-benzofuran-6-yl}oxy)oxane-2-carboxylic acid	n/a	C21H20O11	448.101	M+Cl	-	483.07	5	n/a
M483T136	6.83629	1.65e-07	0.0021645	2.91e-05	0.0078766	2.13106	exp:con	0.12532	HMDB0148861	6-{3-[(4,6-dihydroxy-3-oxo-2,3-dihydro-1-benzofuran-2-yl)methyl]phenoxy}-3,4,5-trihydroxyoxane-2-carboxylic acid	n/a	C21H20O11	448.101	M+Cl	-	483.07	5	n/a
M483T136	6.83629	1.65e-07	0.0021645	2.91e-05	0.0078766	2.13106	exp:con	0.12532	HMDB0141977	2-{4-[3,5-dihydroxy-7-(2-hydroxyethoxy)-4-oxo-4H-chromen-2-yl]-2-(2-hydroxyethoxy)phenoxy}acetic acid	n/a	C21H20O11	448.101	M+Cl	-	483.07	5	n/a
M483T136	6.83629	1.65e-07	0.0021645	2.91e-05	0.0078766	2.13106	exp:con	0.12532	HMDB0135149	2-(3,4-dihydroxyphenyl)-5,7-dihydroxy-3-[(3,4,5-trihydroxy-6-methyloxan-2-yl)oxy]-4H-chromen-4-one	n/a	C21H20O11	448.101	M+Cl	-	483.07	5	n/a
M483T136	6.83629	1.65e-07	0.0021645	2.91e-05	0.0078766	2.13106	exp:con	0.12532	HMDB0152304	Vincetoxicoside B	n/a	C21H20O11	448.101	M+Cl	-	483.07	5	n/a
M483T136	6.83629	1.65e-07	0.0021645	2.91e-05	0.0078766	2.13106	exp:con	0.12532	HMDB0152365	5,7-dihydroxy-2-(4-hydroxy-3-methoxyphenyl)-3-[(3,4,5-trihydroxyoxan-2-yl)oxy]-4H-chromen-4-one	n/a	C21H20O11	448.101	M+Cl	-	483.07	5	n/a
M483T136	6.83629	1.65e-07	0.0021645	2.91e-05	0.0078766	2.13106	exp:con	0.12532	HMDB0038468	Luteolin 4'-glucoside	n/a	C21H20O11	448.101	M+Cl	-	483.07	5	n/a
M483T136	6.83629	1.65e-07	0.0021645	2.91e-05	0.0078766	2.13106	exp:con	0.12532	HMDB0037429	Astragalin	C12249	C21H20O11	448.101	M+Cl	-	483.07	5	map00944 Flavone and flavonol biosynthesis;map01110 Biosynthesis of secondary metabolites;
M483T136	6.83629	1.65e-07	0.0021645	2.91e-05	0.0078766	2.13106	exp:con	0.12532	HMDB0030614	Orientin	C10114	C21H20O11	448.101	M+Cl	-	483.07	5	n/a
M483T136	6.83629	1.65e-07	0.0021645	2.91e-05	0.0078766	2.13106	exp:con	0.12532	HMDB0038467	Luteolin 7-galactoside	n/a	C21H20O11	448.101	M+Cl	-	483.07	5	n/a
M483T136	6.83629	1.65e-07	0.0021645	2.91e-05	0.0078766	2.13106	exp:con	0.12532	HMDB0127356	Isoorientin 2''-[3,4-dihydroxycinnamoyl-(->?)-glucoside]	n/a	C21H20O11	448.101	M+Cl	-	483.07	5	n/a
M483T136	6.83629	1.65e-07	0.0021645	2.91e-05	0.0078766	2.13106	exp:con	0.12532	HMDB0035588	Luteolin 7-glucoside	C03951	C21H20O11	448.101	M+Cl	-	483.07	5	map00944 Flavone and flavonol biosynthesis;
M483T136	6.83629	1.65e-07	0.0021645	2.91e-05	0.0078766	2.13106	exp:con	0.12532	HMDB0037377	Carthamone	C08598	C21H20O11	448.101	M+Cl	-	483.07	5	n/a
M483T136	6.83629	1.65e-07	0.0021645	2.91e-05	0.0078766	2.13106	exp:con	0.12532	HMDB0033751	Quercitrin	C01750	C21H20O11	448.101	M+Cl	-	483.07	5	map00944 Flavone and flavonol biosynthesis;
M483T136	6.83629	1.65e-07	0.0021645	2.91e-05	0.0078766	2.13106	exp:con	0.12532	HMDB0127455	3,5,7-trihydroxy-2-(4-{[3,4,5-trihydroxy-6-(hydroxymethyl)oxan-2-yl]oxy}phenyl)-4H-chromen-4-one	n/a	C21H20O11	448.101	M+Cl	-	483.07	5	n/a
M483T136	6.83629	1.65e-07	0.0021645	2.91e-05	0.0078766	2.13106	exp:con	0.12532	HMDB0037359	Azaleatin 3-arabinoside	n/a	C21H20O11	448.101	M+Cl	-	483.07	5	n/a
M483T136	6.83629	1.65e-07	0.0021645	2.91e-05	0.0078766	2.13106	exp:con	0.12532	HMDB0030864	Xylosylastragalin	n/a	C21H20O11	448.101	M+Cl	-	483.07	5	n/a
M483T136	6.83629	1.65e-07	0.0021645	2.91e-05	0.0078766	2.13106	exp:con	0.12532	HMDB0037572	Kaempferol 5-glucoside	n/a	C21H20O11	448.101	M+Cl	-	483.07	5	n/a
M483T136	6.83629	1.65e-07	0.0021645	2.91e-05	0.0078766	2.13106	exp:con	0.12532	HMDB0029209	naringenin-7-O-glucuronide	n/a	C21H20O11	448.101	M+Cl	-	483.07	5	n/a
M483T136	6.83629	1.65e-07	0.0021645	2.91e-05	0.0078766	2.13106	exp:con	0.12532	HMDB0029208	(3S,5R,6S)-6-[4-(5,7-dihydroxy-4-oxo-3,4-dihydro-2H-1-benzopyran-2-yl)phenoxy]-3,4,5-trihydroxyoxane-2-carboxylic acid	n/a	C21H20O11	448.101	M+Cl	-	483.07	5	n/a
M483T136	6.83629	1.65e-07	0.0021645	2.91e-05	0.0078766	2.13106	exp:con	0.12532	HMDB0041760	Naringenin 5-O-glucuronide	n/a	C21H20O11	448.101	M+Cl	-	483.07	5	n/a
M483T136	6.83629	1.65e-07	0.0021645	2.91e-05	0.0078766	2.13106	exp:con	0.12532	HMDB0041761	Naringenin 7-O-glucuronide	n/a	C21H20O11	448.101	M+Cl	-	483.07	5	n/a
M483T136	6.83629	1.65e-07	0.0021645	2.91e-05	0.0078766	2.13106	exp:con	0.12532	HMDB0041759	Naringenin 4'-O-glucuronide	n/a	C21H20O11	448.101	M+Cl	-	483.07	5	n/a
M483T136	6.83629	1.65e-07	0.0021645	2.91e-05	0.0078766	2.13106	exp:con	0.12532	HMDB0032903	1,2,6,8-Tetrahydroxy-3-methylanthraquinone 2-O-b-D-glucoside	n/a	C21H20O11	448.101	M+Cl	-	483.07	5	n/a
M483T136	6.83629	1.65e-07	0.0021645	2.91e-05	0.0078766	2.13106	exp:con	0.12532	HMDB0128087	3,4,5-trihydroxy-6-{4-[3-oxo-3-(2,4,6-trihydroxyphenyl)prop-1-en-1-yl]phenoxy}oxane-2-carboxylic acid	n/a	C21H20O11	448.101	M+Cl	-	483.07	5	n/a
M483T136	6.83629	1.65e-07	0.0021645	2.91e-05	0.0078766	2.13106	exp:con	0.12532	HMDB0137569	3,4,5-trihydroxy-6-({6-hydroxy-2-[(4-hydroxyphenyl)methyl]-3-oxo-2,3-dihydro-1-benzofuran-5-yl}oxy)oxane-2-carboxylic acid	n/a	C21H20O11	448.101	M+Cl	-	483.07	5	n/a
M483T136	6.83629	1.65e-07	0.0021645	2.91e-05	0.0078766	2.13106	exp:con	0.12532	HMDB0128085	6-{3,5-dihydroxy-2-[3-(4-hydroxyphenyl)prop-2-enoyl]phenoxy}-3,4,5-trihydroxyoxane-2-carboxylic acid	n/a	C21H20O11	448.101	M+Cl	-	483.07	5	n/a
M483T136	6.83629	1.65e-07	0.0021645	2.91e-05	0.0078766	2.13106	exp:con	0.12532	HMDB0128086	6-{3,5-dihydroxy-4-[3-(4-hydroxyphenyl)prop-2-enoyl]phenoxy}-3,4,5-trihydroxyoxane-2-carboxylic acid	n/a	C21H20O11	448.101	M+Cl	-	483.07	5	n/a
M483T136	6.83629	1.65e-07	0.0021645	2.91e-05	0.0078766	2.13106	exp:con	0.12532	HMDB0128082	3,4,5-trihydroxy-6-{[7-hydroxy-2-(4-hydroxyphenyl)-4-oxo-3,4-dihydro-2H-1-benzopyran-5-yl]oxy}oxane-2-carboxylic acid	n/a	C21H20O11	448.101	M+Cl	-	483.07	5	n/a
M483T136	6.83629	1.65e-07	0.0021645	2.91e-05	0.0078766	2.13106	exp:con	0.12532	HMDB0127132	5,6,7-trihydroxy-2-(4-hydroxyphenyl)-8-[3,4,5-trihydroxy-6-(hydroxymethyl)oxan-2-yl]-4H-chromen-4-one	n/a	C21H20O11	448.101	M+Cl	-	483.07	5	n/a
M483T136	6.83629	1.65e-07	0.0021645	2.91e-05	0.0078766	2.13106	exp:con	0.12532	HMDB0125411	6-[3,5-dihydroxy-4-(2-oxo-3-phenylpropanoyl)phenoxy]-3,4,5-trihydroxyoxane-2-carboxylic acid	n/a	C21H20O11	448.101	M+Cl	-	483.07	5	n/a
M483T136	6.83629	1.65e-07	0.0021645	2.91e-05	0.0078766	2.13106	exp:con	0.12532	HMDB0128104	3,4,5-trihydroxy-6-{4-[(1E)-3-oxo-3-(2,4,6-trihydroxyphenyl)prop-1-en-1-yl]phenoxy}oxane-2-carboxylic acid	n/a	C21H20O11	448.101	M+Cl	-	483.07	5	n/a
M483T136	6.83629	1.65e-07	0.0021645	2.91e-05	0.0078766	2.13106	exp:con	0.12532	HMDB0125410	6-[3,5-dihydroxy-2-(2-oxo-3-phenylpropanoyl)phenoxy]-3,4,5-trihydroxyoxane-2-carboxylic acid	n/a	C21H20O11	448.101	M+Cl	-	483.07	5	n/a
M483T136	6.83629	1.65e-07	0.0021645	2.91e-05	0.0078766	2.13106	exp:con	0.12532	HMDB0125404	6-[(3,7-dihydroxy-4-oxo-2-phenyl-3,4-dihydro-2H-1-benzopyran-5-yl)oxy]-3,4,5-trihydroxyoxane-2-carboxylic acid	n/a	C21H20O11	448.101	M+Cl	-	483.07	5	n/a
M483T136	6.83629	1.65e-07	0.0021645	2.91e-05	0.0078766	2.13106	exp:con	0.12532	HMDB0125405	6-[(3,5-dihydroxy-4-oxo-2-phenyl-3,4-dihydro-2H-1-benzopyran-7-yl)oxy]-3,4,5-trihydroxyoxane-2-carboxylic acid	n/a	C21H20O11	448.101	M+Cl	-	483.07	5	n/a
M483T136	6.83629	1.65e-07	0.0021645	2.91e-05	0.0078766	2.13106	exp:con	0.12532	HMDB0128083	6-[4-(5,7-dihydroxy-4-oxo-3,4-dihydro-2H-1-benzopyran-2-yl)phenoxy]-3,4,5-trihydroxyoxane-2-carboxylic acid	n/a	C21H20O11	448.101	M+Cl	-	483.07	5	n/a
M483T136	6.83629	1.65e-07	0.0021645	2.91e-05	0.0078766	2.13106	exp:con	0.12532	HMDB0132732	3-{[3,4-dihydroxy-5-(hydroxymethyl)oxolan-2-yl]oxy}-5,7-dihydroxy-2-(4-hydroxy-3-methoxyphenyl)-4H-chromen-4-one	n/a	C21H20O11	448.101	M+Cl	-	483.07	5	n/a
M483T136	6.83629	1.65e-07	0.0021645	2.91e-05	0.0078766	2.13106	exp:con	0.12532	HMDB0134900	6-[(5,6-dihydroxy-4-oxo-2-phenyl-3,4-dihydro-2H-1-benzopyran-7-yl)oxy]-3,4,5-trihydroxyoxane-2-carboxylic acid	n/a	C21H20O11	448.101	M+Cl	-	483.07	5	n/a
M483T136	6.83629	1.65e-07	0.0021645	2.91e-05	0.0078766	2.13106	exp:con	0.12532	HMDB0127468	3,5-dihydroxy-2-(4-hydroxyphenyl)-7-{[3,4,5-trihydroxy-6-(hydroxymethyl)oxan-2-yl]oxy}-4H-chromen-4-one	n/a	C21H20O11	448.101	M+Cl	-	483.07	5	n/a
M483T136	6.83629	1.65e-07	0.0021645	2.91e-05	0.0078766	2.13106	exp:con	0.12532	HMDB0125126	2-(3,4-dihydroxyphenyl)-5,7-dihydroxy-3-{[3,4,5-trihydroxy-6-(hydroxymethyl)oxan-2-yl]oxy}-1λ⁴-chromen-1-ylium	n/a	C21H21O11	449.108	M+Cl	-	483.07	5	n/a
M483T136	6.83629	1.65e-07	0.0021645	2.91e-05	0.0078766	2.13106	exp:con	0.12532	HMDB0125125	2-(3,4-dihydroxyphenyl)-3,7-dihydroxy-5-{[3,4,5-trihydroxy-6-(hydroxymethyl)oxan-2-yl]oxy}-1λ⁴-chromen-1-ylium	n/a	C21H21O11	449.108	M+Cl	-	483.07	5	n/a
M483T136	6.83629	1.65e-07	0.0021645	2.91e-05	0.0078766	2.13106	exp:con	0.12532	HMDB0037990	Cyanidin 4'-glucoside	n/a	C21H21O11	449.108	M+Cl	-	483.071	6	n/a
M483T136	6.83629	1.65e-07	0.0021645	2.91e-05	0.0078766	2.13106	exp:con	0.12532	HMDB0037978	Cyanidin 7-glucoside	n/a	C21H21O11	449.108	M+Cl	-	483.071	6	n/a
M483T136	6.83629	1.65e-07	0.0021645	2.91e-05	0.0078766	2.13106	exp:con	0.12532	HMDB0030684	Cyanidin 3-glucoside	C08604	C21H21O11	449.108	M+Cl	-	483.071	6	map00942 Anthocyanin biosynthesis;
M483T136	6.83629	1.65e-07	0.0021645	2.91e-05	0.0078766	2.13106	exp:con	0.12532	HMDB0037977	Cyanidin 3-galactoside	C08647	C21H21O11	449.108	M+Cl	-	483.071	6	n/a
M483T136	6.83629	1.65e-07	0.0021645	2.91e-05	0.0078766	2.13106	exp:con	0.12532	HMDB0139434	8-(2-aminoethyl)-2-[3-methoxy-4-(sulfooxy)phenyl]-1H,2H,6H-furo[3,2-e]indole-1-carboxylic acid	n/a	C20H20N2O8S	448.094	M+Cl	-	483.063	8	n/a
M531T135	0.0913224	0.00544277	0.00865801	0.0177723	0.0233787	1.83155	exp:con	0.221422	HMDB0006117	APGPR Enterostatin	n/a	C21H36N8O6	496.276	M+Cl	-	531.245	9	n/a
M543T312	0.228761	0.0052869	0.025974	0.0173929	0.0560999	1.63124	exp:con	0.122802	HMDB0172559	6-[(17-carboxy-9,10-dihydroxyheptadecyl)oxy]-3,4,5-trihydroxyoxane-2-carboxylic acid	n/a	C24H44O11	508.288	M+Cl	-	543.258	2	n/a
M543T312	0.228761	0.0052869	0.025974	0.0173929	0.0560999	1.63124	exp:con	0.122802	HMDB0172558	6-[(1-carboxy-8,17-dihydroxyheptadecan-9-yl)oxy]-3,4,5-trihydroxyoxane-2-carboxylic acid	n/a	C24H44O11	508.288	M+Cl	-	543.258	2	n/a
M543T312	0.228761	0.0052869	0.025974	0.0173929	0.0560999	1.63124	exp:con	0.122802	HMDB0172560	3,4,5-trihydroxy-6-[(9,10,18-trihydroxyoctadecanoyl)oxy]oxane-2-carboxylic acid	n/a	C24H44O11	508.288	M+Cl	-	543.258	2	n/a
M543T312	0.228761	0.0052869	0.025974	0.0173929	0.0560999	1.63124	exp:con	0.122802	HMDB0172557	6-[(1-carboxy-9,17-dihydroxyheptadecan-8-yl)oxy]-3,4,5-trihydroxyoxane-2-carboxylic acid	n/a	C24H44O11	508.288	M+Cl	-	543.258	2	n/a
M543T312	0.228761	0.0052869	0.025974	0.0173929	0.0560999	1.63124	exp:con	0.122802	HMDB0173047	{17-hydroxy-14-[(3Z)-1-hydroxy-5,6-dimethylhept-3-en-2-yl]-2,15-dimethyltetracyclo[8.7.0.0²,⁷.0¹¹,¹⁵]heptadeca-1(10),7-dien-5-yl}oxidanesulfonic acid	n/a	C28H44O6S	508.286	M+Cl	-	543.255	3	n/a
M543T312	0.228761	0.0052869	0.025974	0.0173929	0.0560999	1.63124	exp:con	0.122802	HMDB0176106	{15-[(3E)-5,6-dimethylhept-3-en-2-yl]-5-hydroxy-2,16-dimethyl-8-oxapentacyclo[9.7.0.0²,⁷.0⁷,⁹.0¹²,¹⁶]octadec-1(11)-en-10-yl}oxidanesulfonic acid	n/a	C28H44O6S	508.286	M+Cl	-	543.255	3	n/a
M543T312	0.228761	0.0052869	0.025974	0.0173929	0.0560999	1.63124	exp:con	0.122802	HMDB0173001	[8-hydroxy-2,11,15-trimethyl-14-(6-methylhept-5-en-2-yl)-5-oxotetracyclo[8.7.0.0²,⁷.0¹¹,¹⁵]heptadec-1(10)-en-9-yl]oxidanesulfonic acid	n/a	C28H44O6S	508.286	M+Cl	-	543.255	3	n/a
M543T312	0.228761	0.0052869	0.025974	0.0173929	0.0560999	1.63124	exp:con	0.122802	HMDB0176107	{15-[(3E)-5,6-dimethylhept-3-en-2-yl]-10-hydroxy-2,16-dimethyl-8-oxapentacyclo[9.7.0.0²,⁷.0⁷,⁹.0¹²,¹⁶]octadec-1(11)-en-5-yl}oxidanesulfonic acid	n/a	C28H44O6S	508.286	M+Cl	-	543.255	3	n/a
M567T208	3.7461	0.000561166	0.004329	0.00361672	0.0134018	1.2896	exp:con	1.23e-05	HMDB0015174	(4Z)-4-{2-[4-(diaminomethylidene)cyclohexa-2,5-dien-1-ylidene]ethylidene}-3-oxocyclohexa-1,5-diene-1-carboximidamide; bis(2-hydroxyethane-1-sulfonic acid)	n/a	C20H28N4O9S2	532.13	M+Cl	-	567.099	6	n/a
M567T208	3.7461	0.000561166	0.004329	0.00361672	0.0134018	1.2896	exp:con	1.23e-05	HMDB0128894	6-({11,15-dimethoxy-13-oxo-6,8,20-trioxapentacyclo[10.8.0.0²,⁹.0³,⁷.0¹⁴,¹⁹]icosa-1(12),2(9),10,14,16,18-hexaen-17-yl}oxy)-3,4,5-trihydroxyoxane-2-carboxylic acid	n/a	C25H24O13	532.122	M+Cl	-	567.091	9	n/a
M567T208	3.7461	0.000561166	0.004329	0.00361672	0.0134018	1.2896	exp:con	1.23e-05	HMDB0128895	6-({11,15-dimethoxy-13-oxo-6,8,20-trioxapentacyclo[10.8.0.0²,⁹.0³,⁷.0¹⁴,¹⁹]icosa-1(12),2(9),10,14(19),15,17-hexaen-16-yl}oxy)-3,4,5-trihydroxyoxane-2-carboxylic acid	n/a	C25H24O13	532.122	M+Cl	-	567.091	9	n/a
M567T208	3.7461	0.000561166	0.004329	0.00361672	0.0134018	1.2896	exp:con	1.23e-05	HMDB0128897	6-({11,15-dimethoxy-13-oxo-6,8,20-trioxapentacyclo[10.8.0.0²,⁹.0³,⁷.0¹⁴,¹⁹]icosa-1(12),2(9),10,14,16,18-hexaen-4-yl}oxy)-3,4,5-trihydroxyoxane-2-carboxylic acid	n/a	C25H24O13	532.122	M+Cl	-	567.091	9	n/a
M567T208	3.7461	0.000561166	0.004329	0.00361672	0.0134018	1.2896	exp:con	1.23e-05	HMDB0149118	6-({6-[5-(2-carboxyethyl)-7-methoxy-1-benzofuran-2-yl]-2H-1,3-benzodioxol-5-yl}oxy)-3,4,5-trihydroxyoxane-2-carboxylic acid	n/a	C25H24O13	532.122	M+Cl	-	567.091	9	n/a
M567T208	3.7461	0.000561166	0.004329	0.00361672	0.0134018	1.2896	exp:con	1.23e-05	HMDB0149119	3,4,5-trihydroxy-6-({3-[2-(6-hydroxy-2H-1,3-benzodioxol-5-yl)-7-methoxy-1-benzofuran-5-yl]propanoyl}oxy)oxane-2-carboxylic acid	n/a	C25H24O13	532.122	M+Cl	-	567.091	9	n/a
M567T208	3.7461	0.000561166	0.004329	0.00361672	0.0134018	1.2896	exp:con	1.23e-05	HMDB0149124	6-({3-[2-(2H-1,3-benzodioxol-5-yl)-6-hydroxy-7-methoxy-1-benzofuran-5-yl]propanoyl}oxy)-3,4,5-trihydroxyoxane-2-carboxylic acid	n/a	C25H24O13	532.122	M+Cl	-	567.091	9	n/a
M567T208	3.7461	0.000561166	0.004329	0.00361672	0.0134018	1.2896	exp:con	1.23e-05	HMDB0038777	2'',6''-Diacetylorientin	n/a	C25H24O13	532.122	M+Cl	-	567.091	9	n/a
M567T208	3.7461	0.000561166	0.004329	0.00361672	0.0134018	1.2896	exp:con	1.23e-05	HMDB0038817	2'',6''-Di-O-acetylisoorientin	n/a	C25H24O13	532.122	M+Cl	-	567.091	9	n/a
M567T208	3.7461	0.000561166	0.004329	0.00361672	0.0134018	1.2896	exp:con	1.23e-05	HMDB0030640	Biochanin A 7-(6-malonylglucoside)	C12625	C25H24O13	532.122	M+Cl	-	567.091	9	map00943 Isoflavonoid biosynthesis;
M567T208	3.7461	0.000561166	0.004329	0.00361672	0.0134018	1.2896	exp:con	1.23e-05	HMDB0039323	6''-O-Malonylglycitin	C16197	C25H24O13	532.122	M+Cl	-	567.091	9	map00943 Isoflavonoid biosynthesis;
M567T208	3.7461	0.000561166	0.004329	0.00361672	0.0134018	1.2896	exp:con	1.23e-05	HMDB0039246	2'-Hydroxygenistein 7-(6''-malonylglucoside)	n/a	C25H24O13	532.122	M+Cl	-	567.091	9	n/a
M567T208	3.7461	0.000561166	0.004329	0.00361672	0.0134018	1.2896	exp:con	1.23e-05	HMDB0149123	6-{[2-(2H-1,3-benzodioxol-5-yl)-5-(2-carboxyethyl)-7-methoxy-1-benzofuran-6-yl]oxy}-3,4,5-trihydroxyoxane-2-carboxylic acid	n/a	C25H24O13	532.122	M+Cl	-	567.091	9	n/a
M577T144	7.69643	1.5e-07	0.0021645	2.79e-05	0.0078766	2.14368	exp:con	7.77e-11	HMDB0168342	6-({7',8'-dihydroxy-1H,1'H,2H,2'H,3H,3'H,4H,4'H-[2,2'-binaphthalene]-1,1',4,4'-tetryl}oxy)-3,4,5-trihydroxyoxane-2-carboxylic acid	n/a	C26H22O13	542.106	M+Cl	-	577.075	8	n/a
M577T144	7.69643	1.5e-07	0.0021645	2.79e-05	0.0078766	2.14368	exp:con	7.77e-11	HMDB0168341	6-({7,8'-dihydroxy-1H,1'H,2H,2'H,3H,3'H,4H,4'H-[2,2'-binaphthalene]-1,1',4,4'-tetryl}oxy)-3,4,5-trihydroxyoxane-2-carboxylic acid	n/a	C26H22O13	542.106	M+Cl	-	577.075	8	n/a
M577T144	7.69643	1.5e-07	0.0021645	2.79e-05	0.0078766	2.14368	exp:con	7.77e-11	HMDB0168340	6-({6',8'-dihydroxy-1H,1'H,2H,2'H,3H,3'H,4H,4'H-[2,2'-binaphthalene]-1,1',4,4'-tetryl}oxy)-3,4,5-trihydroxyoxane-2-carboxylic acid	n/a	C26H22O13	542.106	M+Cl	-	577.075	8	n/a
M577T144	7.69643	1.5e-07	0.0021645	2.79e-05	0.0078766	2.14368	exp:con	7.77e-11	HMDB0168339	6-({6,8'-dihydroxy-1H,1'H,2H,2'H,3H,3'H,4H,4'H-[2,2'-binaphthalene]-1,1',4,4'-tetryl}oxy)-3,4,5-trihydroxyoxane-2-carboxylic acid	n/a	C26H22O13	542.106	M+Cl	-	577.075	8	n/a
M577T144	7.69643	1.5e-07	0.0021645	2.79e-05	0.0078766	2.14368	exp:con	7.77e-11	HMDB0168338	6-({8,8'-dihydroxy-1H,1'H,2H,2'H,3H,3'H,4H,4'H-[2,2'-binaphthalene]-1,1',4,4'-tetryl}oxy)-3,4,5-trihydroxyoxane-2-carboxylic acid	n/a	C26H22O13	542.106	M+Cl	-	577.075	8	n/a
M577T144	7.69643	1.5e-07	0.0021645	2.79e-05	0.0078766	2.14368	exp:con	7.77e-11	HMDB0168324	6-({7-[3-(2-carboxy-6-hydroxyphenyl)-3-oxoprop-1-en-2-yl]-5,8-dioxo-5,6,7,8-tetrahydronaphthalen-1-yl}oxy)-3,4,5-trihydroxyoxane-2-carboxylic acid	n/a	C26H22O13	542.106	M+Cl	-	577.075	8	n/a
M577T144	7.69643	1.5e-07	0.0021645	2.79e-05	0.0078766	2.14368	exp:con	7.77e-11	HMDB0168325	3,4,5-trihydroxy-6-{3-hydroxy-2-[2-(8-hydroxy-1,4-dioxo-1,2,3,4-tetrahydronaphthalen-2-yl)prop-2-enoyl]benzoyloxy}oxane-2-carboxylic acid	n/a	C26H22O13	542.106	M+Cl	-	577.075	8	n/a
M577T144	7.69643	1.5e-07	0.0021645	2.79e-05	0.0078766	2.14368	exp:con	7.77e-11	HMDB0168323	6-{3-carboxy-2-[2-(8-hydroxy-1,4-dioxo-1,2,3,4-tetrahydronaphthalen-2-yl)prop-2-enoyl]phenoxy}-3,4,5-trihydroxyoxane-2-carboxylic acid	n/a	C26H22O13	542.106	M+Cl	-	577.075	8	n/a
M577T144	7.69643	1.5e-07	0.0021645	2.79e-05	0.0078766	2.14368	exp:con	7.77e-11	HMDB0168320	3,4,5-trihydroxy-6-{3-hydroxy-2-[2-(8-hydroxy-1,4-dioxo-1,4-dihydronaphthalen-2-yl)propanoyl]benzoyloxy}oxane-2-carboxylic acid	n/a	C26H22O13	542.106	M+Cl	-	577.075	8	n/a
M577T144	7.69643	1.5e-07	0.0021645	2.79e-05	0.0078766	2.14368	exp:con	7.77e-11	HMDB0168319	6-({7-[1-(2-carboxy-6-hydroxyphenyl)-1-oxopropan-2-yl]-5,8-dioxo-5,8-dihydronaphthalen-1-yl}oxy)-3,4,5-trihydroxyoxane-2-carboxylic acid	n/a	C26H22O13	542.106	M+Cl	-	577.075	8	n/a
M577T144	7.69643	1.5e-07	0.0021645	2.79e-05	0.0078766	2.14368	exp:con	7.77e-11	HMDB0168318	6-{3-carboxy-2-[2-(8-hydroxy-1,4-dioxo-1,4-dihydronaphthalen-2-yl)propanoyl]phenoxy}-3,4,5-trihydroxyoxane-2-carboxylic acid	n/a	C26H22O13	542.106	M+Cl	-	577.075	8	n/a
M583T229	3.36439	8.5e-06	0.0021645	0.000275386	0.0078766	1.68662	exp:con	0.279026	HMDB0143846	{[(10aS)-4,7-bis(dimethylamino)-1,8,10a,11-tetrahydroxy-9-(C-hydroxycarbonimidoyl)-10,12-dioxo-5,5a,6,6a,7,8,9,10,10a,11,11a,12-dodecahydrotetracen-2-yl]carbamoyl}formic acid	n/a	C25H32N4O10	548.212	M+Cl	-	583.181	10	n/a
M657T209	0.245403	0.0073206	0.0411255	0.0222599	0.0811879	2.59372	exp:con	0.0417051	HMDB0129226	(3-{8-[5,7-dihydroxy-2-(4-hydroxyphenyl)-4-oxo-3,4-dihydro-2H-1-benzopyran-3-yl]-5,7-dihydroxy-4-oxo-3,4-dihydro-2H-1-benzopyran-2-yl}phenyl)oxidanesulfonic acid	n/a	C30H22O13S	622.078	M+Cl	-	657.048	0	n/a
M657T209	0.245403	0.0073206	0.0411255	0.0222599	0.0811879	2.59372	exp:con	0.0417051	HMDB0129233	{5-[8-(5,7-dihydroxy-4-oxo-2-phenyl-3,4-dihydro-2H-1-benzopyran-3-yl)-5,7-dihydroxy-4-oxo-3,4-dihydro-2H-1-benzopyran-2-yl]-2-hydroxyphenyl}oxidanesulfonic acid	n/a	C30H22O13S	622.078	M+Cl	-	657.048	0	n/a
M657T209	0.245403	0.0073206	0.0411255	0.0222599	0.0811879	2.59372	exp:con	0.0417051	HMDB0151092	(4-{4'-[(E)-2-(3,5-dihydroxy-4-methoxyphenyl)ethenyl]-4,6,6'-trihydroxy-2'-oxo-2H,2'H-3,3'-spirobi[[1]benzofuran]-2-yl}phenyl)oxidanesulfonic acid	n/a	C30H22O13S	622.078	M+Cl	-	657.048	0	n/a
M674T96	2.76702	0.00115847	0.0021645	0.00588875	0.0078766	1.15205	exp:con	8.86e-12	HMDB0143315	{2-[(2S)-4-{[4-amino-5-hydroxy-6-(hydroxymethyl)oxan-2-yl]oxy}-2,5,12-trihydroxy-7-methoxy-6,11-dioxo-1,2,3,4,6,11-hexahydrotetracen-2-yl]-2-oxoethoxy}sulfonic acid	n/a	C27H29NO15S	639.126	M+Cl	-	674.095	1	n/a
M674T96	2.76702	0.00115847	0.0021645	0.00588875	0.0078766	1.15205	exp:con	8.86e-12	HMDB0143331	(4-amino-2-methyl-6-{[(3R)-3,4,5,12-tetrahydroxy-3-(2-hydroxyacetyl)-10-methoxy-6,11-dioxo-1,2,3,4,6,11-hexahydrotetracen-1-yl]oxy}oxan-3-yl)oxidanesulfonic acid	n/a	C27H29NO15S	639.126	M+Cl	-	674.095	1	n/a
M674T96	2.76702	0.00115847	0.0021645	0.00588875	0.0078766	1.15205	exp:con	8.86e-12	HMDB0143329	{2-[(2R)-4-[(4-amino-5-hydroxy-6-methyloxan-2-yl)oxy]-1,2,5,12-tetrahydroxy-7-methoxy-6,11-dioxo-1,2,3,4,6,11-hexahydrotetracen-2-yl]-2-oxoethoxy}sulfonic acid	n/a	C27H29NO15S	639.126	M+Cl	-	674.095	1	n/a
M674T96	2.76702	0.00115847	0.0021645	0.00588875	0.0078766	1.15205	exp:con	8.86e-12	HMDB0143326	(4-amino-2-methyl-6-{[(3S)-3,5,9,12-tetrahydroxy-3-(2-hydroxyacetyl)-10-methoxy-6,11-dioxo-1,2,3,4,6,11-hexahydrotetracen-1-yl]oxy}oxan-3-yl)oxidanesulfonic acid	n/a	C27H29NO15S	639.126	M+Cl	-	674.095	1	n/a
M674T96	2.76702	0.00115847	0.0021645	0.00588875	0.0078766	1.15205	exp:con	8.86e-12	HMDB0143325	{2-[(2S)-4-[(4-amino-5-hydroxy-6-methyloxan-2-yl)oxy]-2,5,8,12-tetrahydroxy-7-methoxy-6,11-dioxo-1,2,3,4,6,11-hexahydrotetracen-2-yl]-2-oxoethoxy}sulfonic acid	n/a	C27H29NO15S	639.126	M+Cl	-	674.095	1	n/a
M674T96	2.76702	0.00115847	0.0021645	0.00588875	0.0078766	1.15205	exp:con	8.86e-12	HMDB0143321	(4-amino-2-methyl-6-{[(3S)-3,5,8,12-tetrahydroxy-3-(2-hydroxyacetyl)-10-methoxy-6,11-dioxo-1,2,3,4,6,11-hexahydrotetracen-1-yl]oxy}oxan-3-yl)oxidanesulfonic acid	n/a	C27H29NO15S	639.126	M+Cl	-	674.095	1	n/a
M674T96	2.76702	0.00115847	0.0021645	0.00588875	0.0078766	1.15205	exp:con	8.86e-12	HMDB0143320	{2-[(2S)-4-[(4-amino-5-hydroxy-6-methyloxan-2-yl)oxy]-2,5,9,12-tetrahydroxy-7-methoxy-6,11-dioxo-1,2,3,4,6,11-hexahydrotetracen-2-yl]-2-oxoethoxy}sulfonic acid	n/a	C27H29NO15S	639.126	M+Cl	-	674.095	1	n/a
M674T96	2.76702	0.00115847	0.0021645	0.00588875	0.0078766	1.15205	exp:con	8.86e-12	HMDB0143316	[4-amino-2-(hydroxymethyl)-6-{[(3S)-3,5,12-trihydroxy-3-(2-hydroxyacetyl)-10-methoxy-6,11-dioxo-1,2,3,4,6,11-hexahydrotetracen-1-yl]oxy}oxan-3-yl]oxidanesulfonic acid	n/a	C27H29NO15S	639.126	M+Cl	-	674.095	1	n/a
M674T96	2.76702	0.00115847	0.0021645	0.00588875	0.0078766	1.15205	exp:con	8.86e-12	HMDB0143314	[(4-amino-3-hydroxy-6-{[(3S)-3,5,12-trihydroxy-3-(2-hydroxyacetyl)-10-methoxy-6,11-dioxo-1,2,3,4,6,11-hexahydrotetracen-1-yl]oxy}oxan-2-yl)methoxy]sulfonic acid	n/a	C27H29NO15S	639.126	M+Cl	-	674.095	1	n/a
M674T96	2.76702	0.00115847	0.0021645	0.00588875	0.0078766	1.15205	exp:con	8.86e-12	HMDB0143330	[(2R)-4-[(4-amino-5-hydroxy-6-methyloxan-2-yl)oxy]-2,5,12-trihydroxy-2-(2-hydroxyacetyl)-7-methoxy-6,11-dioxo-1,2,3,4,6,11-hexahydrotetracen-1-yl]oxidanesulfonic acid	n/a	C27H29NO15S	639.126	M+Cl	-	674.095	1	n/a
M763T400	0.345544	0.00743554	0.0021645	0.0225414	0.0078766	1.28132	exp:con	0.085164	HMDB0035990	Cerebroside B	n/a	C41H77NO9	727.56	M+Cl	-	762.529	2	n/a
M763T400	0.345544	0.00743554	0.0021645	0.0225414	0.0078766	1.28132	exp:con	0.085164	HMDB0009050	PE(18:1(11Z)/P-18:1(11Z))	n/a	C41H78NO7P	727.552	M+Cl	-	762.521	9	n/a
M763T400	0.345544	0.00743554	0.0021645	0.0225414	0.0078766	1.28132	exp:con	0.085164	HMDB0009084	PE(18:1(9Z)/P-18:1(9Z))	n/a	C41H78NO7P	727.552	M+Cl	-	762.521	9	n/a
M763T400	0.345544	0.00743554	0.0021645	0.0225414	0.0078766	1.28132	exp:con	0.085164	HMDB0009083	PE(18:1(9Z)/P-18:1(11Z))	n/a	C41H78NO7P	727.552	M+Cl	-	762.521	9	n/a
M763T400	0.345544	0.00743554	0.0021645	0.0225414	0.0078766	1.28132	exp:con	0.085164	HMDB0009115	PE(18:2(9Z,12Z)/P-18:0)	n/a	C41H78NO7P	727.552	M+Cl	-	762.521	9	n/a
M763T400	0.345544	0.00743554	0.0021645	0.0225414	0.0078766	1.28132	exp:con	0.085164	HMDB0009312	PE(20:2(11Z,14Z)/P-16:0)	n/a	C41H78NO7P	727.552	M+Cl	-	762.521	9	n/a
M763T400	0.345544	0.00743554	0.0021645	0.0225414	0.0078766	1.28132	exp:con	0.085164	HMDB0011349	PE(P-16:0/20:2(11Z,14Z))	n/a	C41H78NO7P	727.552	M+Cl	-	762.521	9	n/a
M763T400	0.345544	0.00743554	0.0021645	0.0225414	0.0078766	1.28132	exp:con	0.085164	HMDB0011376	PE(P-18:0/18:2(9Z,12Z))	n/a	C41H78NO7P	727.552	M+Cl	-	762.521	9	n/a
M763T400	0.345544	0.00743554	0.0021645	0.0225414	0.0078766	1.28132	exp:con	0.085164	HMDB0011408	PE(P-18:1(11Z)/18:1(9Z))	n/a	C41H78NO7P	727.552	M+Cl	-	762.521	9	n/a
M763T400	0.345544	0.00743554	0.0021645	0.0225414	0.0078766	1.28132	exp:con	0.085164	HMDB0011407	PE(P-18:1(11Z)/18:1(11Z))	n/a	C41H78NO7P	727.552	M+Cl	-	762.521	9	n/a
M763T400	0.345544	0.00743554	0.0021645	0.0225414	0.0078766	1.28132	exp:con	0.085164	HMDB0011440	PE(P-18:1(9Z)/18:1(11Z))	n/a	C41H78NO7P	727.552	M+Cl	-	762.521	9	n/a
M763T400	0.345544	0.00743554	0.0021645	0.0225414	0.0078766	1.28132	exp:con	0.085164	HMDB0011441	PE(P-18:1(9Z)/18:1(9Z))	n/a	C41H78NO7P	727.552	M+Cl	-	762.521	9	n/a
M763T400	0.345544	0.00743554	0.0021645	0.0225414	0.0078766	1.28132	exp:con	0.085164	HMDB0009051	PE(18:1(11Z)/P-18:1(9Z))	n/a	C41H78NO7P	727.552	M+Cl	-	762.521	9	n/a
M808T52	0.384552	3.17e-06	0.0021645	0.000161147	0.0078766	1.52638	exp:con	0.0751416	HMDB0186003	2-amino-4-({1-[(carboxymethyl)-C-hydroxycarbonimidoyl]-2-{[3-hydroxy-3-methyl-1,4-dioxo-2-(3,7,11,15-tetramethylhexadec-2-en-1-yl)-1,2,3,4-tetrahydronaphthalen-2-yl]sulfanyl}ethyl}-C-hydroxycarbonimidoyl)butanoic acid	n/a	C41H63N3O9S	773.429	M+Cl	-	808.398	2	n/a
M808T52	0.384552	3.17e-06	0.0021645	0.000161147	0.0078766	1.52638	exp:con	0.0751416	HMDB0186004	2-amino-4-({1-[(carboxymethyl)-C-hydroxycarbonimidoyl]-2-{[3-hydroxy-2-methyl-1,4-dioxo-3-(3,7,11,15-tetramethylhexadec-2-en-1-yl)-1,2,3,4-tetrahydronaphthalen-2-yl]sulfanyl}ethyl}-C-hydroxycarbonimidoyl)butanoic acid	n/a	C41H63N3O9S	773.429	M+Cl	-	808.398	2	n/a
M841T52	0.499157	8.36e-06	0.0021645	0.000274879	0.0078766	1.26129	exp:con	0.0843789	HMDB0038759	Licoricesaponin C2	n/a	C42H62O15	806.409	M+Cl	-	841.378	2	n/a
M841T52	0.499157	8.36e-06	0.0021645	0.000274879	0.0078766	1.26129	exp:con	0.0843789	HMDB0175645	6-{[10,11-bis(acetyloxy)-9-[(acetyloxy)methyl]-4a-carboxy-2,2,6a,6b,9,12a-hexamethyl-1,2,3,4,4a,5,6,6a,6b,7,8,8a,9,10,11,12,12a,12b,13,14b-icosahydropicen-1-yl]oxy}-3,4,5-trihydroxyoxane-2-carboxylic acid	n/a	C42H62O15	806.409	M+Cl	-	841.378	2	n/a
M841T52	0.499157	8.36e-06	0.0021645	0.000274879	0.0078766	1.26129	exp:con	0.0843789	HMDB0175646	6-[10,11-bis(acetyloxy)-9-[(acetyloxy)methyl]-1-hydroxy-2,2,6a,6b,9,12a-hexamethyl-1,2,3,4,4a,5,6,6a,6b,7,8,8a,9,10,11,12,12a,12b,13,14b-icosahydropicene-4a-carbonyloxy]-3,4,5-trihydroxyoxane-2-carboxylic acid	n/a	C42H62O15	806.409	M+Cl	-	841.378	2	n/a
M433T102	4.22244	0.000133489	0.0021645	0.00141193	0.0078766	1.7687	exp:con	0.114792	HMDB0175006	4,7-dihydroxy-5-methoxy-10-oxo-9-(sulfooxy)-9,10-dihydroanthracene-2-carboxylic acid	n/a	C16H12O10S	396.015	M+K-2H	-	432.964	5	n/a
M433T102	4.22244	0.000133489	0.0021645	0.00141193	0.0078766	1.7687	exp:con	0.114792	HMDB0138839	[2-hydroxy-11-(4-hydroxyphenyl)-13-oxo-4,6,10-trioxatricyclo[7.4.0.0³,⁷]trideca-1,3(7),8-trien-12-yl]oxidanesulfonic acid	n/a	C16H12O10S	396.015	M+K-2H	-	432.964	5	n/a
M433T102	4.22244	0.000133489	0.0021645	0.00141193	0.0078766	1.7687	exp:con	0.114792	HMDB0138842	[2-hydroxy-11-(2-hydroxyphenyl)-13-oxo-4,6,10-trioxatricyclo[7.4.0.0³,⁷]trideca-1,3(7),8-trien-12-yl]oxidanesulfonic acid	n/a	C16H12O10S	396.015	M+K-2H	-	432.964	5	n/a
M433T102	4.22244	0.000133489	0.0021645	0.00141193	0.0078766	1.7687	exp:con	0.114792	HMDB0146292	[2,6-dihydroxy-4-(5-hydroxy-7-methoxy-4-oxo-4H-chromen-3-yl)phenyl]oxidanesulfonic acid	n/a	C16H12O10S	396.015	M+K-2H	-	432.964	5	n/a
M433T102	4.22244	0.000133489	0.0021645	0.00141193	0.0078766	1.7687	exp:con	0.114792	HMDB0146289	[5-(5,6-dihydroxy-7-methoxy-4-oxo-4H-chromen-3-yl)-2-hydroxyphenyl]oxidanesulfonic acid	n/a	C16H12O10S	396.015	M+K-2H	-	432.964	5	n/a
M433T102	4.22244	0.000133489	0.0021645	0.00141193	0.0078766	1.7687	exp:con	0.114792	HMDB0150823	[5-(5,7-dihydroxy-6-methoxy-4-oxo-4H-chromen-2-yl)-2-hydroxyphenyl]oxidanesulfonic acid	n/a	C16H12O10S	396.015	M+K-2H	-	432.964	5	n/a
M433T102	4.22244	0.000133489	0.0021645	0.00141193	0.0078766	1.7687	exp:con	0.114792	HMDB0138835	[2-hydroxy-11-(3-hydroxyphenyl)-13-oxo-4,6,10-trioxatricyclo[7.4.0.0³,⁷]trideca-1,3(7),8-trien-12-yl]oxidanesulfonic acid	n/a	C16H12O10S	396.015	M+K-2H	-	432.964	5	n/a
M433T102	4.22244	0.000133489	0.0021645	0.00141193	0.0078766	1.7687	exp:con	0.114792	HMDB0150828	[5-(6,7-dihydroxy-5-methoxy-4-oxo-4H-chromen-2-yl)-2-hydroxyphenyl]oxidanesulfonic acid	n/a	C16H12O10S	396.015	M+K-2H	-	432.964	5	n/a
M433T102	4.22244	0.000133489	0.0021645	0.00141193	0.0078766	1.7687	exp:con	0.114792	HMDB0151494	{[3,5,6-trihydroxy-2-(4-hydroxyphenyl)-4-oxo-4H-chromen-8-yl]methoxy}sulfonic acid	n/a	C16H12O10S	396.015	M+K-2H	-	432.964	5	n/a
M433T102	4.22244	0.000133489	0.0021645	0.00141193	0.0078766	1.7687	exp:con	0.114792	HMDB0151507	[2-hydroxy-5-(3,5,6-trihydroxy-8-methyl-4-oxo-4H-chromen-2-yl)phenyl]oxidanesulfonic acid	n/a	C16H12O10S	396.015	M+K-2H	-	432.964	5	n/a
M433T102	4.22244	0.000133489	0.0021645	0.00141193	0.0078766	1.7687	exp:con	0.114792	HMDB0152040	[2-methoxy-5-(5,7,8-trihydroxy-4-oxo-4H-chromen-2-yl)phenyl]oxidanesulfonic acid	n/a	C16H12O10S	396.015	M+K-2H	-	432.964	5	n/a
M433T102	4.22244	0.000133489	0.0021645	0.00141193	0.0078766	1.7687	exp:con	0.114792	HMDB0152237	[2-(hydroxymethyl)-5-(3,5,7-trihydroxy-4-oxo-4H-chromen-2-yl)phenyl]oxidanesulfonic acid	n/a	C16H12O10S	396.015	M+K-2H	-	432.964	5	n/a
M433T102	4.22244	0.000133489	0.0021645	0.00141193	0.0078766	1.7687	exp:con	0.114792	HMDB0152238	{[2-hydroxy-4-(3,5,7-trihydroxy-4-oxo-4H-chromen-2-yl)phenyl]methoxy}sulfonic acid	n/a	C16H12O10S	396.015	M+K-2H	-	432.964	5	n/a
M433T102	4.22244	0.000133489	0.0021645	0.00141193	0.0078766	1.7687	exp:con	0.114792	HMDB0152322	SCHEMBL3642561	n/a	C16H12O10S	396.015	M+K-2H	-	432.964	5	n/a
M433T102	4.22244	0.000133489	0.0021645	0.00141193	0.0078766	1.7687	exp:con	0.114792	HMDB0174960	[(3,4,7-trihydroxy-5-methoxy-9,10-dioxo-9,10-dihydroanthracen-2-yl)methoxy]sulfonic acid	n/a	C16H12O10S	396.015	M+K-2H	-	432.964	5	n/a
M433T102	4.22244	0.000133489	0.0021645	0.00141193	0.0078766	1.7687	exp:con	0.114792	HMDB0138838	(4-{2,12-dihydroxy-13-oxo-4,6,10-trioxatricyclo[7.4.0.0³,⁷]trideca-1,3(7),8-trien-11-yl}phenyl)oxidanesulfonic acid	n/a	C16H12O10S	396.015	M+K-2H	-	432.964	5	n/a
M433T102	4.22244	0.000133489	0.0021645	0.00141193	0.0078766	1.7687	exp:con	0.114792	HMDB0138834	(3-{2,12-dihydroxy-13-oxo-4,6,10-trioxatricyclo[7.4.0.0³,⁷]trideca-1,3(7),8-trien-11-yl}phenyl)oxidanesulfonic acid	n/a	C16H12O10S	396.015	M+K-2H	-	432.964	5	n/a
M433T102	4.22244	0.000133489	0.0021645	0.00141193	0.0078766	1.7687	exp:con	0.114792	HMDB0177042	4-{[(1Z)-1-carboxy-2-(3-hydroxyphenyl)eth-1-en-1-yl]oxy}-3-(sulfooxy)benzoic acid	n/a	C16H12O10S	396.015	M+K-2H	-	432.964	5	n/a
M433T102	4.22244	0.000133489	0.0021645	0.00141193	0.0078766	1.7687	exp:con	0.114792	HMDB0177041	4-{[(1Z)-1-carboxy-2-[3-(sulfooxy)phenyl]eth-1-en-1-yl]oxy}-3-hydroxybenzoic acid	n/a	C16H12O10S	396.015	M+K-2H	-	432.964	5	n/a
M433T102	4.22244	0.000133489	0.0021645	0.00141193	0.0078766	1.7687	exp:con	0.114792	HMDB0175010	4,7-dihydroxy-5-methoxy-9-oxo-10-(sulfooxy)-9,10-dihydroanthracene-2-carboxylic acid	n/a	C16H12O10S	396.015	M+K-2H	-	432.964	5	n/a
M433T102	4.22244	0.000133489	0.0021645	0.00141193	0.0078766	1.7687	exp:con	0.114792	HMDB0128825	[3-(3,5,7-trihydroxy-6-methoxy-4-oxo-4H-chromen-2-yl)phenyl]oxidanesulfonic acid	n/a	C16H12O10S	396.015	M+K-2H	-	432.964	5	n/a
M433T102	4.22244	0.000133489	0.0021645	0.00141193	0.0078766	1.7687	exp:con	0.114792	HMDB0131940	[5-(5,6-dihydroxy-7-methoxy-4-oxo-4H-chromen-2-yl)-2-hydroxyphenyl]oxidanesulfonic acid	n/a	C16H12O10S	396.015	M+K-2H	-	432.964	5	n/a
M433T102	4.22244	0.000133489	0.0021645	0.00141193	0.0078766	1.7687	exp:con	0.114792	HMDB0133829	[5-(3,5-dihydroxy-7-methoxy-4-oxo-4H-chromen-2-yl)-2-hydroxyphenyl]oxidanesulfonic acid	n/a	C16H12O10S	396.015	M+K-2H	-	432.964	5	n/a
M433T102	4.22244	0.000133489	0.0021645	0.00141193	0.0078766	1.7687	exp:con	0.114792	HMDB0135939	[2,6-dihydroxy-3-(7-hydroxy-5-methoxy-4-oxo-4H-chromen-3-yl)phenyl]oxidanesulfonic acid	n/a	C16H12O10S	396.015	M+K-2H	-	432.964	5	n/a
M433T102	4.22244	0.000133489	0.0021645	0.00141193	0.0078766	1.7687	exp:con	0.114792	HMDB0136029	[2,6-dihydroxy-3-(5-hydroxy-7-methoxy-4-oxo-4H-chromen-3-yl)phenyl]oxidanesulfonic acid	n/a	C16H12O10S	396.015	M+K-2H	-	432.964	5	n/a
M433T102	4.22244	0.000133489	0.0021645	0.00141193	0.0078766	1.7687	exp:con	0.114792	HMDB0174964	[(4,6,7-trihydroxy-5-methoxy-9,10-dioxo-9,10-dihydroanthracen-2-yl)methoxy]sulfonic acid	n/a	C16H12O10S	396.015	M+K-2H	-	432.964	5	n/a
M433T102	4.22244	0.000133489	0.0021645	0.00141193	0.0078766	1.7687	exp:con	0.114792	HMDB0240537	Isorhamnetin 3-sulfate	n/a	C16H10O10S	394.001	M+K-2H	-	432.964	5	n/a
M433T102	4.22244	0.000133489	0.0021645	0.00141193	0.0078766	1.7687	exp:con	0.114792	HMDB0031554	Sucralose	C12285	C12H19Cl3O8	396.015	M+K-2H	-	432.963	6	map04973 Carbohydrate digestion and absorption;
M487T400	3.16734	0.00601188	0.0151515	0.0191662	0.0368461	1.07234	exp:con	4.66e-07	HMDB0040835	Cycloaltilisin	n/a	C26H26O7	450.168	M+K-2H	-	487.116	1	n/a
M487T400	3.16734	0.00601188	0.0151515	0.0191662	0.0368461	1.07234	exp:con	4.66e-07	HMDB0040481	Dihydroisocycloartomunin	n/a	C26H26O7	450.168	M+K-2H	-	487.116	1	n/a
M487T400	3.16734	0.00601188	0.0151515	0.0191662	0.0368461	1.07234	exp:con	4.66e-07	HMDB0038877	Dihydrocycloartomunin	n/a	C26H26O7	450.168	M+K-2H	-	487.116	1	n/a
M487T400	3.16734	0.00601188	0.0151515	0.0191662	0.0368461	1.07234	exp:con	4.66e-07	HMDB0029905	Lucuminoside	C08335	C26H26O7	450.168	M+K-2H	-	487.116	1	n/a
M487T400	3.16734	0.00601188	0.0151515	0.0191662	0.0368461	1.07234	exp:con	4.66e-07	HMDB0034020	Cajaisoflavone	n/a	C26H26O7	450.168	M+K-2H	-	487.116	1	n/a
M487T400	3.16734	0.00601188	0.0151515	0.0191662	0.0368461	1.07234	exp:con	4.66e-07	HMDB0144014	(6S,12aS)-3,5,6,10,11,12a-hexahydroxy-6-methyl-4-(methylamino)-1,12-dioxo-1,2,3,4,4a,5,5a,6,11,11a,12,12a-dodecahydrotetracene-2-carboximidic acid	n/a	C21H26N2O9	450.164	M+K-2H	-	487.112	9	n/a
M487T400	3.16734	0.00601188	0.0151515	0.0191662	0.0368461	1.07234	exp:con	4.66e-07	HMDB0181183	3,4,5-trihydroxy-6-{4-methyl-2-[5-methyl-4-oxo-5-(propan-2-yl)-4,5-dihydro-1H-imidazol-2-yl]benzoyloxy}oxane-2-carboxylic acid	n/a	C21H26N2O9	450.164	M+K-2H	-	487.112	9	n/a
M513T97	0.252117	0.0035561	0.025974	0.0129953	0.0560999	1.47009	exp:con	0.211205	HMDB0183861	3,4,5-trihydroxy-6-{[(4E,6Z)-7-methyl-3-methylidene-9-(2,6,6-trimethylcyclohex-1-en-1-yl)nona-4,6,8-trienoyl]oxy}oxane-2-carboxylic acid	n/a	C26H36O8	476.241	M+K-2H	-	513.19	8	n/a
M513T97	0.252117	0.0035561	0.025974	0.0129953	0.0560999	1.47009	exp:con	0.211205	HMDB0183817	6-{[(2E,4E,6Z)-3,7-dimethyl-9-(2,6,6-trimethylcyclohex-1-en-1-yl)nona-2,4,6,8-tetraenoyl]oxy}-3,4,5-trihydroxyoxane-2-carboxylic acid	n/a	C26H36O8	476.241	M+K-2H	-	513.19	8	n/a
M513T97	0.252117	0.0035561	0.025974	0.0129953	0.0560999	1.47009	exp:con	0.211205	HMDB0156490	6-({2-[(1E,3E,5E,7E)-3,7-dimethyl-9-oxonona-1,3,5,7-tetraen-1-yl]-1,3-dimethylcyclohex-2-en-1-yl}methoxy)-3,4,5-trihydroxyoxane-2-carboxylic acid	n/a	C26H36O8	476.241	M+K-2H	-	513.19	8	n/a
M513T97	0.252117	0.0035561	0.025974	0.0129953	0.0560999	1.47009	exp:con	0.211205	HMDB0156489	AC1NTD6K	n/a	C26H36O8	476.241	M+K-2H	-	513.19	8	n/a
M513T97	0.252117	0.0035561	0.025974	0.0129953	0.0560999	1.47009	exp:con	0.211205	HMDB0156478	6-({4-[(1E,3E,5E,7E)-3,7-dimethyl-9-oxonona-1,3,5,7-tetraen-1-yl]-3,5,5-trimethylcyclohex-3-en-1-yl}oxy)-3,4,5-trihydroxyoxane-2-carboxylic acid	n/a	C26H36O8	476.241	M+K-2H	-	513.19	8	n/a
M513T97	0.252117	0.0035561	0.025974	0.0129953	0.0560999	1.47009	exp:con	0.211205	HMDB0156476	6-({3-[(1E,3E,5E,7E)-3,7-dimethyl-9-oxonona-1,3,5,7-tetraen-1-yl]-2,2,4-trimethylcyclohex-3-en-1-yl}oxy)-3,4,5-trihydroxyoxane-2-carboxylic acid	n/a	C26H36O8	476.241	M+K-2H	-	513.19	8	n/a
M513T97	0.252117	0.0035561	0.025974	0.0129953	0.0560999	1.47009	exp:con	0.211205	HMDB0156474	3,4,5-trihydroxy-6-{[(2Z)-2-[(1E,3E,5E)-4-methyl-6-(2,6,6-trimethylcyclohex-1-en-1-yl)hexa-1,3,5-trien-1-yl]-4-oxobut-2-en-1-yl]oxy}oxane-2-carboxylic acid	n/a	C26H36O8	476.241	M+K-2H	-	513.19	8	n/a
M513T97	0.252117	0.0035561	0.025974	0.0129953	0.0560999	1.47009	exp:con	0.211205	HMDB0156470	6-({2-[(1E,3E,5E,7E)-3,7-dimethyl-9-oxonona-1,3,5,7-tetraen-1-yl]-3,3-dimethylcyclohex-1-en-1-yl}methoxy)-3,4,5-trihydroxyoxane-2-carboxylic acid	n/a	C26H36O8	476.241	M+K-2H	-	513.19	8	n/a
M513T97	0.252117	0.0035561	0.025974	0.0129953	0.0560999	1.47009	exp:con	0.211205	HMDB0156472	3,4,5-trihydroxy-6-{[(2Z,4E,6E)-6-methyl-8-oxo-2-[(E)-2-(2,6,6-trimethylcyclohex-1-en-1-yl)ethenyl]octa-2,4,6-trien-1-yl]oxy}oxane-2-carboxylic acid	n/a	C26H36O8	476.241	M+K-2H	-	513.19	8	n/a
M513T97	0.252117	0.0035561	0.025974	0.0129953	0.0560999	1.47009	exp:con	0.211205	HMDB0156468	6-({3-[(1E,3E,5E,7E)-3,7-dimethyl-9-oxonona-1,3,5,7-tetraen-1-yl]-2,4,4-trimethylcyclohex-2-en-1-yl}oxy)-3,4,5-trihydroxyoxane-2-carboxylic acid	n/a	C26H36O8	476.241	M+K-2H	-	513.19	8	n/a
M513T97	0.252117	0.0035561	0.025974	0.0129953	0.0560999	1.47009	exp:con	0.211205	HMDB0062632	1-o-all-trans-retinoyl-beta-glucuronic acid	n/a	C26H36O8	476.241	M+K-2H	-	513.19	8	n/a
M513T97	0.252117	0.0035561	0.025974	0.0129953	0.0560999	1.47009	exp:con	0.211205	HMDB0030153	Austalide H	n/a	C26H36O8	476.241	M+K-2H	-	513.19	8	n/a
M513T97	0.252117	0.0035561	0.025974	0.0129953	0.0560999	1.47009	exp:con	0.211205	HMDB0003141	Retinoyl b-glucuronide	C11061	C26H36O8	476.241	M+K-2H	-	513.19	8	map00830 Retinol metabolism;
M561T100	3.14406	0.00751952	0.0021645	0.0226936	0.0078766	1.57612	exp:con	0.0772665	HMDB0156364	[5-(2,6-dihydroxy-9H-purin-9-yl)-4-hydroxy-2-({[hydroxy(phosphonooxy)phosphoryl]oxy}methyl)oxolan-3-yl]oxidanesulfonic acid	n/a	C10H14N4O15P2S	523.965	M+K-2H	-	560.914	4	n/a
M561T100	3.14406	0.00751952	0.0021645	0.0226936	0.0078766	1.57612	exp:con	0.0772665	HMDB0156363	[2-(2,6-dihydroxy-9H-purin-9-yl)-4-hydroxy-5-({[hydroxy(phosphonooxy)phosphoryl]oxy}methyl)oxolan-3-yl]oxidanesulfonic acid	n/a	C10H14N4O15P2S	523.965	M+K-2H	-	560.914	4	n/a
M575T102	2.38961	0.0031272	0.0021645	0.0118549	0.0078766	1.11766	exp:con	0.0348527	HMDB0141556	{4-[5,7-dihydroxy-3-(3,4,5-trihydroxybenzoyloxy)-3,4-dihydro-2H-1-benzopyran-2-yl]-2,6-dihydroxyphenyl}oxidanesulfonic acid	n/a	C22H18O14S	538.042	M+K-2H	-	574.99	0	n/a
M575T102	2.38961	0.0031272	0.0021645	0.0118549	0.0078766	1.11766	exp:con	0.0348527	HMDB0141557	[4-({[5,7-dihydroxy-2-(3,4,5-trihydroxyphenyl)-3,4-dihydro-2H-1-benzopyran-3-yl]oxy}carbonyl)-2,6-dihydroxyphenyl]oxidanesulfonic acid	n/a	C22H18O14S	538.042	M+K-2H	-	574.99	0	n/a
M649T64	2.2858	0.00496306	0.004329	0.0165874	0.0134018	1.11903	exp:con	2.32e-12	HMDB0154393	8-[2-hydroxy-1-(2,4,6-trihydroxyphenyl)-3-(3,4,5-trihydroxyphenyl)propyl]-2-(3,4,5-trihydroxyphenyl)-3,4-dihydro-2H-1-benzopyran-3,5,7-triol	n/a	C30H28O14	612.148	M+K-2H	-	649.097	0	n/a
M649T64	2.2858	0.00496306	0.004329	0.0165874	0.0134018	1.11903	exp:con	2.32e-12	HMDB0138915	6-{[5-(5,7-dihydroxy-4-oxo-3,4-dihydro-2H-1-benzopyran-2-yl)-3-(hydroxymethyl)-2-(3-hydroxyphenyl)-2,3-dihydro-1-benzofuran-7-yl]oxy}-3,4,5-trihydroxyoxane-2-carboxylic acid	n/a	C30H28O14	612.148	M+K-2H	-	649.097	0	n/a
M649T64	2.2858	0.00496306	0.004329	0.0165874	0.0134018	1.11903	exp:con	2.32e-12	HMDB0138916	6-{3-[5-(5,7-dihydroxy-4-oxo-3,4-dihydro-2H-1-benzopyran-2-yl)-7-hydroxy-3-(hydroxymethyl)-2,3-dihydro-1-benzofuran-2-yl]phenoxy}-3,4,5-trihydroxyoxane-2-carboxylic acid	n/a	C30H28O14	612.148	M+K-2H	-	649.097	0	n/a
M649T64	2.2858	0.00496306	0.004329	0.0165874	0.0134018	1.11903	exp:con	2.32e-12	HMDB0138913	3,4,5-trihydroxy-6-({5-hydroxy-2-[7-hydroxy-3-(hydroxymethyl)-2-(3-hydroxyphenyl)-2,3-dihydro-1-benzofuran-5-yl]-4-oxo-3,4-dihydro-2H-1-benzopyran-7-yl}oxy)oxane-2-carboxylic acid	n/a	C30H28O14	612.148	M+K-2H	-	649.097	0	n/a
M649T64	2.2858	0.00496306	0.004329	0.0165874	0.0134018	1.11903	exp:con	2.32e-12	HMDB0138914	3,4,5-trihydroxy-6-({7-hydroxy-2-[7-hydroxy-3-(hydroxymethyl)-2-(3-hydroxyphenyl)-2,3-dihydro-1-benzofuran-5-yl]-4-oxo-3,4-dihydro-2H-1-benzopyran-5-yl}oxy)oxane-2-carboxylic acid	n/a	C30H28O14	612.148	M+K-2H	-	649.097	0	n/a
M649T64	2.2858	0.00496306	0.004329	0.0165874	0.0134018	1.11903	exp:con	2.32e-12	HMDB0003337	Oxidized glutathione	C00127	C20H32N6O12S2	612.152	M+K-2H	-	649.101	7	map00480 Glutathione metabolism;map04216 Ferroptosis;map04918 Thyroid hormone synthesis;
M657T55	2.45232	8.81e-05	0.0021645	0.00105621	0.0078766	1.08169	exp:con	3.67e-10	HMDB0030096	Peonidin 3,5-diglucoside	n/a	C27H25O17	621.109	M+K-2H	-	657.051	1	n/a
M717T61	0.108102	0.000162718	0.0021645	0.00160019	0.0078766	2.04462	exp:con	0.245607	HMDB0161050	3-[20-(2-carboxyethyl)-10-(1-hydroxyethyl)-5,9,14,19-tetramethyl-15-[1-(sulfooxy)ethyl]-21,22,23,24-tetraazapentacyclo[16.2.1.1³,⁶.1⁸,¹¹.1¹³,¹⁶]tetracosa-1(21),2,4,6,8,10,12,14,16(22),17,19-undecaen-4-yl]propanoic acid	n/a	C34H38N4O9S	678.236	M+K-2H	-	717.199	5	n/a
M717T61	0.108102	0.000162718	0.0021645	0.00160019	0.0078766	2.04462	exp:con	0.245607	HMDB0161051	3-[20-(2-carboxyethyl)-15-(1-hydroxyethyl)-5,9,14,19-tetramethyl-10-[1-(sulfooxy)ethyl]-21,22,23,24-tetraazapentacyclo[16.2.1.1³,⁶.1⁸,¹¹.1¹³,¹⁶]tetracosa-1(21),2,4,6,8,10,12,14,16(22),17,19-undecaen-4-yl]propanoic acid	n/a	C34H38N4O9S	678.236	M+K-2H	-	717.199	5	n/a
M717T61	0.108102	0.000162718	0.0021645	0.00160019	0.0078766	2.04462	exp:con	0.245607	HMDB0129847	6-{[8-(2,4-dihydroxyphenyl)-7-(3,7-dimethylocta-2,6-dien-1-yl)-2-(hydroxymethyl)-2-methyl-6-oxo-2H,6H-pyrano[3,2-g]chromen-5-yl]oxy}-3,4,5-trihydroxyoxane-2-carboxylic acid	n/a	C36H40O13	680.247	M+K-2H	-	717.195	10	n/a
M717T61	0.108102	0.000162718	0.0021645	0.00160019	0.0078766	2.04462	exp:con	0.245607	HMDB0129864	6-(4-{3-[5-(3,3-dimethyloxiran-2-yl)-3-methylpent-2-en-1-yl]-5-hydroxy-8,8-dimethyl-4-oxo-4H,8H-pyrano[3,2-g]chromen-2-yl}-3-hydroxyphenoxy)-3,4,5-trihydroxyoxane-2-carboxylic acid	n/a	C36H40O13	680.247	M+K-2H	-	717.195	10	n/a
M717T61	0.108102	0.000162718	0.0021645	0.00160019	0.0078766	2.04462	exp:con	0.245607	HMDB0129865	6-(2-{3-[5-(3,3-dimethyloxiran-2-yl)-3-methylpent-2-en-1-yl]-5-hydroxy-8,8-dimethyl-4-oxo-4H,8H-pyrano[3,2-g]chromen-2-yl}-5-hydroxyphenoxy)-3,4,5-trihydroxyoxane-2-carboxylic acid	n/a	C36H40O13	680.247	M+K-2H	-	717.195	10	n/a
M717T61	0.108102	0.000162718	0.0021645	0.00160019	0.0078766	2.04462	exp:con	0.245607	HMDB0129869	6-{4-[6-(3,7-dimethylocta-2,6-dien-1-yl)-9-hydroxy-14,14-dimethyl-7-oxo-4,12,15-trioxatetracyclo[8.5.0.0³,⁸.0¹¹,¹³]pentadeca-1(10),2,5,8-tetraen-5-yl]-3-hydroxyphenoxy}-3,4,5-trihydroxyoxane-2-carboxylic acid	n/a	C36H40O13	680.247	M+K-2H	-	717.195	10	n/a
M717T61	0.108102	0.000162718	0.0021645	0.00160019	0.0078766	2.04462	exp:con	0.245607	HMDB0129870	6-{2-[6-(3,7-dimethylocta-2,6-dien-1-yl)-9-hydroxy-14,14-dimethyl-7-oxo-4,12,15-trioxatetracyclo[8.5.0.0³,⁸.0¹¹,¹³]pentadeca-1(10),2,5,8-tetraen-5-yl]-5-hydroxyphenoxy}-3,4,5-trihydroxyoxane-2-carboxylic acid	n/a	C36H40O13	680.247	M+K-2H	-	717.195	10	n/a
M717T61	0.108102	0.000162718	0.0021645	0.00160019	0.0078766	2.04462	exp:con	0.245607	HMDB0129871	6-{[5-(2,4-dihydroxyphenyl)-6-(3,7-dimethylocta-2,6-dien-1-yl)-14,14-dimethyl-7-oxo-4,12,15-trioxatetracyclo[8.5.0.0³,⁸.0¹¹,¹³]pentadeca-1(10),2,5,8-tetraen-9-yl]oxy}-3,4,5-trihydroxyoxane-2-carboxylic acid	n/a	C36H40O13	680.247	M+K-2H	-	717.195	10	n/a
M717T61	0.108102	0.000162718	0.0021645	0.00160019	0.0078766	2.04462	exp:con	0.245607	HMDB0149570	6-{4,5-dihydroxy-2-[5-hydroxy-8,8-dimethyl-3,10-bis(3-methylbut-2-en-1-yl)-4-oxo-4H,8H-pyrano[3,2-g]chromen-2-yl]phenoxy}-3,4,5-trihydroxyoxane-2-carboxylic acid	n/a	C36H40O13	680.247	M+K-2H	-	717.195	10	n/a
M717T61	0.108102	0.000162718	0.0021645	0.00160019	0.0078766	2.04462	exp:con	0.245607	HMDB0149573	6-{[2,2-dimethyl-7,10-bis(3-methylbut-2-en-1-yl)-6-oxo-8-(2,4,5-trihydroxyphenyl)-2H,6H-pyrano[3,2-g]chromen-5-yl]oxy}-3,4,5-trihydroxyoxane-2-carboxylic acid	n/a	C36H40O13	680.247	M+K-2H	-	717.195	10	n/a
M717T61	0.108102	0.000162718	0.0021645	0.00160019	0.0078766	2.04462	exp:con	0.245607	HMDB0149572	6-{2,4-dihydroxy-5-[5-hydroxy-8,8-dimethyl-3,10-bis(3-methylbut-2-en-1-yl)-4-oxo-4H,8H-pyrano[3,2-g]chromen-2-yl]phenoxy}-3,4,5-trihydroxyoxane-2-carboxylic acid	n/a	C36H40O13	680.247	M+K-2H	-	717.195	10	n/a
M717T61	0.108102	0.000162718	0.0021645	0.00160019	0.0078766	2.04462	exp:con	0.245607	HMDB0149571	6-{2,5-dihydroxy-4-[5-hydroxy-8,8-dimethyl-3,10-bis(3-methylbut-2-en-1-yl)-4-oxo-4H,8H-pyrano[3,2-g]chromen-2-yl]phenoxy}-3,4,5-trihydroxyoxane-2-carboxylic acid	n/a	C36H40O13	680.247	M+K-2H	-	717.195	10	n/a
M717T61	0.108102	0.000162718	0.0021645	0.00160019	0.0078766	2.04462	exp:con	0.245607	HMDB0129845	6-{4-[3-(3,7-dimethylocta-2,6-dien-1-yl)-5-hydroxy-8-(hydroxymethyl)-8-methyl-4-oxo-4H,8H-pyrano[3,2-g]chromen-2-yl]-3-hydroxyphenoxy}-3,4,5-trihydroxyoxane-2-carboxylic acid	n/a	C36H40O13	680.247	M+K-2H	-	717.195	10	n/a
M717T61	0.108102	0.000162718	0.0021645	0.00160019	0.0078766	2.04462	exp:con	0.245607	HMDB0129866	6-{[8-(2,4-dihydroxyphenyl)-7-[5-(3,3-dimethyloxiran-2-yl)-3-methylpent-2-en-1-yl]-2,2-dimethyl-6-oxo-2H,6H-pyrano[3,2-g]chromen-5-yl]oxy}-3,4,5-trihydroxyoxane-2-carboxylic acid	n/a	C36H40O13	680.247	M+K-2H	-	717.195	10	n/a
M717T61	0.108102	0.000162718	0.0021645	0.00160019	0.0078766	2.04462	exp:con	0.245607	HMDB0129860	3,4,5-trihydroxy-6-[5-hydroxy-2-(5-hydroxy-8,8-dimethyl-3-{[3-methyl-3-(4-methylpent-3-en-1-yl)oxiran-2-yl]methyl}-4-oxo-4H,8H-pyrano[3,2-g]chromen-2-yl)phenoxy]oxane-2-carboxylic acid	n/a	C36H40O13	680.247	M+K-2H	-	717.195	10	n/a
M717T61	0.108102	0.000162718	0.0021645	0.00160019	0.0078766	2.04462	exp:con	0.245607	HMDB0129851	6-{2-[3-(3,7-dimethylocta-2,6-dien-1-yl)-5-hydroxy-8,8-dimethyl-4-oxo-4H,8H-pyrano[3,2-g]chromen-2-yl]-4,5-dihydroxyphenoxy}-3,4,5-trihydroxyoxane-2-carboxylic acid	n/a	C36H40O13	680.247	M+K-2H	-	717.195	10	n/a
M717T61	0.108102	0.000162718	0.0021645	0.00160019	0.0078766	2.04462	exp:con	0.245607	HMDB0129850	6-{4-[3-(3,7-dimethylocta-2,6-dien-1-yl)-5-hydroxy-8,8-dimethyl-4-oxo-4H,8H-pyrano[3,2-g]chromen-2-yl]-2,5-dihydroxyphenoxy}-3,4,5-trihydroxyoxane-2-carboxylic acid	n/a	C36H40O13	680.247	M+K-2H	-	717.195	10	n/a
M717T61	0.108102	0.000162718	0.0021645	0.00160019	0.0078766	2.04462	exp:con	0.245607	HMDB0129849	6-{5-[3-(3,7-dimethylocta-2,6-dien-1-yl)-5-hydroxy-8,8-dimethyl-4-oxo-4H,8H-pyrano[3,2-g]chromen-2-yl]-2,4-dihydroxyphenoxy}-3,4,5-trihydroxyoxane-2-carboxylic acid	n/a	C36H40O13	680.247	M+K-2H	-	717.195	10	n/a
M717T61	0.108102	0.000162718	0.0021645	0.00160019	0.0078766	2.04462	exp:con	0.245607	HMDB0129852	6-{[7-(3,7-dimethylocta-2,6-dien-1-yl)-2,2-dimethyl-6-oxo-8-(2,4,5-trihydroxyphenyl)-2H,6H-pyrano[3,2-g]chromen-5-yl]oxy}-3,4,5-trihydroxyoxane-2-carboxylic acid	n/a	C36H40O13	680.247	M+K-2H	-	717.195	10	n/a
M717T61	0.108102	0.000162718	0.0021645	0.00160019	0.0078766	2.04462	exp:con	0.245607	HMDB0129855	6-{4-[3-(3,7-dimethylocta-2,6-dien-1-yl)-5-hydroxy-8,8-dimethyl-4-oxo-4H,8H-pyrano[3,2-g]chromen-2-yl]-2,3-dihydroxyphenoxy}-3,4,5-trihydroxyoxane-2-carboxylic acid	n/a	C36H40O13	680.247	M+K-2H	-	717.195	10	n/a
M717T61	0.108102	0.000162718	0.0021645	0.00160019	0.0078766	2.04462	exp:con	0.245607	HMDB0129854	6-{3-[3-(3,7-dimethylocta-2,6-dien-1-yl)-5-hydroxy-8,8-dimethyl-4-oxo-4H,8H-pyrano[3,2-g]chromen-2-yl]-2,6-dihydroxyphenoxy}-3,4,5-trihydroxyoxane-2-carboxylic acid	n/a	C36H40O13	680.247	M+K-2H	-	717.195	10	n/a
M717T61	0.108102	0.000162718	0.0021645	0.00160019	0.0078766	2.04462	exp:con	0.245607	HMDB0129859	3,4,5-trihydroxy-6-[3-hydroxy-4-(5-hydroxy-8,8-dimethyl-3-{[3-methyl-3-(4-methylpent-3-en-1-yl)oxiran-2-yl]methyl}-4-oxo-4H,8H-pyrano[3,2-g]chromen-2-yl)phenoxy]oxane-2-carboxylic acid	n/a	C36H40O13	680.247	M+K-2H	-	717.195	10	n/a
M717T61	0.108102	0.000162718	0.0021645	0.00160019	0.0078766	2.04462	exp:con	0.245607	HMDB0129856	6-{6-[3-(3,7-dimethylocta-2,6-dien-1-yl)-5-hydroxy-8,8-dimethyl-4-oxo-4H,8H-pyrano[3,2-g]chromen-2-yl]-2,3-dihydroxyphenoxy}-3,4,5-trihydroxyoxane-2-carboxylic acid	n/a	C36H40O13	680.247	M+K-2H	-	717.195	10	n/a
M717T61	0.108102	0.000162718	0.0021645	0.00160019	0.0078766	2.04462	exp:con	0.245607	HMDB0129857	6-{[7-(3,7-dimethylocta-2,6-dien-1-yl)-2,2-dimethyl-6-oxo-8-(2,3,4-trihydroxyphenyl)-2H,6H-pyrano[3,2-g]chromen-5-yl]oxy}-3,4,5-trihydroxyoxane-2-carboxylic acid	n/a	C36H40O13	680.247	M+K-2H	-	717.195	10	n/a
M717T61	0.108102	0.000162718	0.0021645	0.00160019	0.0078766	2.04462	exp:con	0.245607	HMDB0129846	6-{2-[3-(3,7-dimethylocta-2,6-dien-1-yl)-5-hydroxy-8-(hydroxymethyl)-8-methyl-4-oxo-4H,8H-pyrano[3,2-g]chromen-2-yl]-5-hydroxyphenoxy}-3,4,5-trihydroxyoxane-2-carboxylic acid	n/a	C36H40O13	680.247	M+K-2H	-	717.195	10	n/a
M717T61	0.108102	0.000162718	0.0021645	0.00160019	0.0078766	2.04462	exp:con	0.245607	HMDB0129861	6-{[8-(2,4-dihydroxyphenyl)-2,2-dimethyl-7-{[3-methyl-3-(4-methylpent-3-en-1-yl)oxiran-2-yl]methyl}-6-oxo-2H,6H-pyrano[3,2-g]chromen-5-yl]oxy}-3,4,5-trihydroxyoxane-2-carboxylic acid	n/a	C36H40O13	680.247	M+K-2H	-	717.195	10	n/a
M783T52	0.17888	0.00143706	0.0021645	0.00680395	0.0078766	1.74372	exp:con	0.164814	HMDB0181452	6-({2-[(1E,3E,5E,7E,9E,11E,13E,15E,17E,19E)-3,7,12,16,20,24-hexamethylpentacosa-1,3,5,7,9,11,13,15,17,19,23-undecaen-1-yl]-3-(2-hydroxypropan-2-yl)-1-methylcyclopentyl}oxy)-3,4,5-trihydroxyoxane-2-carboxylic acid	n/a	C46H66O8	746.476	M+K-2H	-	783.424	10	n/a
M783T52	0.17888	0.00143706	0.0021645	0.00680395	0.0078766	1.74372	exp:con	0.164814	HMDB0181451	6-[(2-{2-[(1E,3E,5E,7E,9E,11E,13E,15E,17E,19E)-3,7,12,16,20,24-hexamethylpentacosa-1,3,5,7,9,11,13,15,17,19,23-undecaen-1-yl]-3-hydroxy-3-methylcyclopentyl}propan-2-yl)oxy]-3,4,5-trihydroxyoxane-2-carboxylic acid	n/a	C46H66O8	746.476	M+K-2H	-	783.424	10	n/a
M783T52	0.17888	0.00143706	0.0021645	0.00680395	0.0078766	1.74372	exp:con	0.164814	HMDB0185022	3,4,5-trihydroxy-6-{[(8E,10E,12E,16Z,18E,20E,22E,24E,26E)-7-hydroxy-2,6,10,14,19,23,27,31-octamethyldotriaconta-2,8,10,12,14,16,18,20,22,24,26,30-dodecaen-6-yl]oxy}oxane-2-carboxylic acid	n/a	C46H66O8	746.476	M+K-2H	-	783.424	10	n/a
M783T52	0.17888	0.00143706	0.0021645	0.00680395	0.0078766	1.74372	exp:con	0.164814	HMDB0185023	3,4,5-trihydroxy-6-{[(8E,10E,12E,16Z,18E,20E,22E,24E,26E)-6-hydroxy-2,6,10,14,19,23,27,31-octamethyldotriaconta-2,8,10,12,14,16,18,20,22,24,26,30-dodecaen-7-yl]oxy}oxane-2-carboxylic acid	n/a	C46H66O8	746.476	M+K-2H	-	783.424	10	n/a
M173T68	2.75137	0.000420372	0.0021645	0.0029508	0.0078766	1.34827	exp:con	4.85e-08	HMDB0000292	Xanthine	C00385	C5H4N4O2	152.033	M+Na-2H	-	173.008	1	map00230 Purine metabolism;map00232 Caffeine metabolism;map01060 Biosynthesis of plant secondary metabolites;map01065 Biosynthesis of alkaloids derived from histidine and purine;map01100 Metabolic pathways;map01110 Biosynthesis of secondary metabolites;map01120 Microbial metabolism in diverse environments;
M173T68	2.75137	0.000420372	0.0021645	0.0029508	0.0078766	1.34827	exp:con	4.85e-08	HMDB0000786	Oxypurinol	C07599	C5H4N4O2	152.033	M+Na-2H	-	173.008	1	n/a
M173T68	2.75137	0.000420372	0.0021645	0.0029508	0.0078766	1.34827	exp:con	4.85e-08	HMDB0001182	6,8-Dihydroxypurine	n/a	C5H4N4O2	152.033	M+Na-2H	-	173.008	1	n/a
M211T142	0.281473	0.000445206	0.0021645	0.00306954	0.0078766	1.76721	exp:con	0.0611164	HMDB0031173	6-Hydroxy-1H-indole-3-acetamide	n/a	C10H10N2O2	190.074	M+Na-2H	-	211.049	7	n/a
M253T99	2.16114	0.000850678	0.0021645	0.00477175	0.0078766	1.07571	exp:con	1.6e-08	HMDB0029123	Valyl-Aspartate	n/a	C9H16N2O5	232.106	M+Na-2H	-	253.081	3	n/a
M253T99	2.16114	0.000850678	0.0021645	0.00477175	0.0078766	1.07571	exp:con	1.6e-08	HMDB0001199	N2-Succinyl-L-ornithine	C03415	C9H16N2O5	232.106	M+Na-2H	-	253.081	3	map00330 Arginine and proline metabolism;map01100 Metabolic pathways;
M253T99	2.16114	0.000850678	0.0021645	0.00477175	0.0078766	1.07571	exp:con	1.6e-08	HMDB0012161	4-(Glutamylamino) butanoate	C15767	C9H16N2O5	232.106	M+Na-2H	-	253.081	3	map00330 Arginine and proline metabolism;map01100 Metabolic pathways;
M253T99	2.16114	0.000850678	0.0021645	0.00477175	0.0078766	1.07571	exp:con	1.6e-08	HMDB0029062	Threoninylhydroxyproline	n/a	C9H16N2O5	232.106	M+Na-2H	-	253.081	3	n/a
M253T99	2.16114	0.000850678	0.0021645	0.00477175	0.0078766	1.07571	exp:con	1.6e-08	HMDB0029393	L-N-(3-Carboxypropyl)glutamine	n/a	C9H16N2O5	232.106	M+Na-2H	-	253.081	3	n/a
M253T99	2.16114	0.000850678	0.0021645	0.00477175	0.0078766	1.07571	exp:con	1.6e-08	HMDB0028766	Aspartyl-Valine	n/a	C9H16N2O5	232.106	M+Na-2H	-	253.081	3	n/a
M253T99	2.16114	0.000850678	0.0021645	0.00477175	0.0078766	1.07571	exp:con	1.6e-08	HMDB0028873	Hydroxyprolyl-Threonine	n/a	C9H16N2O5	232.106	M+Na-2H	-	253.081	3	n/a
M295T103	8.05101	9.54e-06	0.0021645	0.000293691	0.0078766	2.29944	exp:con	0.0625027	HMDB0184590	2,3,4-trihydroxy-6-oxo-5-(sulfooxy)hexanoic acid	n/a	C6H10O10S	273.999	M+Na-2H	-	294.974	2	n/a
M295T103	8.05101	9.54e-06	0.0021645	0.000293691	0.0078766	2.29944	exp:con	0.0625027	HMDB0184587	3,4,5-trihydroxy-6-oxo-2-(sulfooxy)hexanoic acid	n/a	C6H10O10S	273.999	M+Na-2H	-	294.974	2	n/a
M295T103	8.05101	9.54e-06	0.0021645	0.000293691	0.0078766	2.29944	exp:con	0.0625027	HMDB0184588	SCHEMBL5073678	n/a	C6H10O10S	273.999	M+Na-2H	-	294.974	2	n/a
M295T103	8.05101	9.54e-06	0.0021645	0.000293691	0.0078766	2.29944	exp:con	0.0625027	HMDB0184589	2,3,5-trihydroxy-6-oxo-4-(sulfooxy)hexanoic acid	n/a	C6H10O10S	273.999	M+Na-2H	-	294.974	2	n/a
M337T180	0.159908	0.000206552	0.0021645	0.00185566	0.0078766	1.93412	exp:con	3.04e-11	HMDB0040563	Perilloside C	n/a	C16H28O6	316.189	M+Na-2H	-	337.163	3	n/a
M337T180	0.159908	0.000206552	0.0021645	0.00185566	0.0078766	1.93412	exp:con	3.04e-11	HMDB0060004	Menthol-glucoronide	n/a	C16H28O6	316.189	M+Na-2H	-	337.163	3	n/a
M337T180	0.159908	0.000206552	0.0021645	0.00185566	0.0078766	1.93412	exp:con	3.04e-11	HMDB0030418	D-Linalool 3-glucoside	n/a	C16H28O6	316.189	M+Na-2H	-	337.163	3	n/a
M337T180	0.159908	0.000206552	0.0021645	0.00185566	0.0078766	1.93412	exp:con	3.04e-11	HMDB0029346	Neryl glucoside	n/a	C16H28O6	316.189	M+Na-2H	-	337.163	3	n/a
M337T180	0.159908	0.000206552	0.0021645	0.00185566	0.0078766	1.93412	exp:con	3.04e-11	HMDB0037147	5(6)-Butyl-1,4-dioxan-2-one	n/a	C16H28O6	316.189	M+Na-2H	-	337.163	3	n/a
M337T180	0.159908	0.000206552	0.0021645	0.00185566	0.0078766	1.93412	exp:con	3.04e-11	HMDB0029856	(S)-alpha-Terpinyl glucoside	n/a	C16H28O6	316.189	M+Na-2H	-	337.163	3	n/a
M349T400	2.02936	0.000943985	0.0021645	0.00514846	0.0078766	1.07842	exp:con	8.4e-11	HMDB0011534	MG(0:0/16:1(9Z)/0:0)	n/a	C19H36O4	328.261	M+Na-2H	-	349.236	3	n/a
M349T400	2.02936	0.000943985	0.0021645	0.00514846	0.0078766	1.07842	exp:con	8.4e-11	HMDB0011565	MG(16:1(9Z)/0:0/0:0)	n/a	C19H36O4	328.261	M+Na-2H	-	349.236	3	n/a
M349T400	2.02936	0.000943985	0.0021645	0.00514846	0.0078766	1.07842	exp:con	8.4e-11	HMDB0031044	Avocadene 2-acetate	n/a	C19H36O4	328.261	M+Na-2H	-	349.236	3	n/a
M349T400	2.02936	0.000943985	0.0021645	0.00514846	0.0078766	1.07842	exp:con	8.4e-11	HMDB0031045	Avocadene 4-acetate	n/a	C19H36O4	328.261	M+Na-2H	-	349.236	3	n/a
M349T400	2.02936	0.000943985	0.0021645	0.00514846	0.0078766	1.07842	exp:con	8.4e-11	HMDB0031043	Avocadene 1-acetate	n/a	C19H36O4	328.261	M+Na-2H	-	349.236	3	n/a
M387T61_2	2.15294	0.00786869	0.0151515	0.0234386	0.0368461	1.00117	exp:con	5.13e-08	HMDB0135722	3-(2-hydroxy-4-methoxyphenyl)-8-(hydroxymethyl)-8-methyl-2H,8H-pyrano[2,3-f]chromen-2-one	n/a	C21H18O6	366.11	M+Na-2H	-	387.085	8	n/a
M387T61_2	2.15294	0.00786869	0.0151515	0.0234386	0.0368461	1.00117	exp:con	5.13e-08	HMDB0147095	Glycyrol	n/a	C21H18O6	366.11	M+Na-2H	-	387.085	8	n/a
M387T61_2	2.15294	0.00786869	0.0151515	0.0234386	0.0368461	1.00117	exp:con	5.13e-08	HMDB0135719	3-(2,3-dihydroxy-4-methoxyphenyl)-8,8-dimethyl-2H,8H-pyrano[2,3-f]chromen-2-one	n/a	C21H18O6	366.11	M+Na-2H	-	387.085	8	n/a
M387T61_2	2.15294	0.00786869	0.0151515	0.0234386	0.0368461	1.00117	exp:con	5.13e-08	HMDB0135720	3-(2,5-dihydroxy-4-methoxyphenyl)-8,8-dimethyl-2H,8H-pyrano[2,3-f]chromen-2-one	n/a	C21H18O6	366.11	M+Na-2H	-	387.085	8	n/a
M387T61_2	2.15294	0.00786869	0.0151515	0.0234386	0.0368461	1.00117	exp:con	5.13e-08	HMDB0135721	5-(2-hydroxy-4-methoxyphenyl)-12,12-dimethyl-3,11,14-trioxatetracyclo[8.5.0.0²,⁷.0¹³,¹⁵]pentadeca-1(10),2(7),5,8-tetraen-4-one	n/a	C21H18O6	366.11	M+Na-2H	-	387.085	8	n/a
M387T61_2	2.15294	0.00786869	0.0151515	0.0234386	0.0368461	1.00117	exp:con	5.13e-08	HMDB0033882	Glycyrol	C16968	C21H18O6	366.11	M+Na-2H	-	387.085	8	n/a
M387T61_2	2.15294	0.00786869	0.0151515	0.0234386	0.0368461	1.00117	exp:con	5.13e-08	HMDB0030080	Wampetin	n/a	C21H18O6	366.11	M+Na-2H	-	387.085	8	n/a
M387T61_2	2.15294	0.00786869	0.0151515	0.0234386	0.0368461	1.00117	exp:con	5.13e-08	HMDB0036556	Glycyrrhizaisoflavone B	n/a	C21H18O6	366.11	M+Na-2H	-	387.085	8	n/a
M391T359	5.9132	4.71e-06	0.0021645	0.000202855	0.0078766	1.64048	exp:con	1.4e-09	HMDB0040270	Diethylhexyl adipate	C14240	C22H42O4	370.308	M+Na-2H	-	391.283	3	n/a
M391T359	5.9132	4.71e-06	0.0021645	0.000202855	0.0078766	1.64048	exp:con	1.4e-09	HMDB0041619	Dioctyl hexanedioate	n/a	C22H42O4	370.308	M+Na-2H	-	391.283	3	n/a
M393T434	2.10985	8.12e-05	0.0021645	0.00100984	0.0078766	1.1559	exp:con	0.0214139	HMDB0040701	9-Hydroxy-7-megastigmen-3-one glucoside	n/a	C19H32O7	372.215	M+Na-2H	-	393.189	10	n/a
M393T434	2.10985	8.12e-05	0.0021645	0.00100984	0.0078766	1.1559	exp:con	0.0214139	HMDB0040668	Blumenol C glucoside	n/a	C19H32O7	372.215	M+Na-2H	-	393.189	10	n/a
M400T107	2.47072	0.000433544	0.0021645	0.00301388	0.0078766	1.27505	exp:con	4.8e-12	HMDB0001066	S-Lactoylglutathione	C03451	C13H21N3O8S	379.105	M+Na-2H	-	400.08	5	map00620 Pyruvate metabolism;
M400T107	2.47072	0.000433544	0.0021645	0.00301388	0.0078766	1.27505	exp:con	4.8e-12	HMDB0172023	2-amino-4-({1-[(carboxymethyl)-C-hydroxycarbonimidoyl]-2-{[hydroxy(oxiran-2-yl)methyl]sulfanyl}ethyl}-C-hydroxycarbonimidoyl)butanoic acid	n/a	C13H21N3O8S	379.105	M+Na-2H	-	400.08	5	n/a
M400T107	2.47072	0.000433544	0.0021645	0.00301388	0.0078766	1.27505	exp:con	4.8e-12	HMDB0172021	2-amino-4-({1-[(carboxymethyl)-C-hydroxycarbonimidoyl]-2-{[(2Z)-2,3-dihydroxyprop-2-en-1-yl]sulfanyl}ethyl}-C-hydroxycarbonimidoyl)butanoic acid	n/a	C13H21N3O8S	379.105	M+Na-2H	-	400.08	5	n/a
M400T107	2.47072	0.000433544	0.0021645	0.00301388	0.0078766	1.27505	exp:con	4.8e-12	HMDB0062624	2-amino-4-({1-[(carboxymethyl)-C-hydroxycarbonimidoyl]-2-[(2-hydroxypropanoyl)sulfanyl]ethyl}-C-hydroxycarbonimidoyl)butanoic acid	n/a	C13H21N3O8S	379.105	M+Na-2H	-	400.08	5	n/a
M404T145	8.20505	3.51e-05	0.0021645	0.000618009	0.0078766	1.90849	exp:con	4.77e-10	HMDB0006535	beta-1,4-Mannosyl-N-acetylglucosamine	n/a	C14H25NO11	383.143	M+Na-2H	-	404.117	6	n/a
M404T145	8.20505	3.51e-05	0.0021645	0.000618009	0.0078766	1.90849	exp:con	4.77e-10	HMDB0001542	N-Acetyllactosamine	C00611	C14H25NO11	383.143	M+Na-2H	-	404.117	6	n/a
M404T145	8.20505	3.51e-05	0.0021645	0.000618009	0.0078766	1.90849	exp:con	4.77e-10	HMDB0006575	Lacto-N-biose I	C06372	C14H25NO11	383.143	M+Na-2H	-	404.117	6	n/a
M404T145	8.20505	3.51e-05	0.0021645	0.000618009	0.0078766	1.90849	exp:con	4.77e-10	HMDB0006583	Poly-N-acetyllactosamine	n/a	C14H25NO11	383.143	M+Na-2H	-	404.117	6	n/a
M421T351	0.122641	0.00554698	0.004329	0.0180308	0.0134018	1.64542	exp:con	0.112981	HMDB0157576	[(2S,15S)-13-hydroxy-2-(hydroxymethyl)-15-methyl-14-oxotetracyclo[8.7.0.0²,⁷.0¹¹,¹⁵]heptadec-7-en-5-yl]oxidanesulfonic acid	n/a	C19H28O7S	400.156	M+Na-2H	-	421.13	3	n/a
M421T351	0.122641	0.00554698	0.004329	0.0180308	0.0134018	1.64542	exp:con	0.112981	HMDB0157578	[(2R,15S)-6,13-dihydroxy-2,15-dimethyl-14-oxotetracyclo[8.7.0.0²,⁷.0¹¹,¹⁵]heptadec-7-en-5-yl]oxidanesulfonic acid	n/a	C19H28O7S	400.156	M+Na-2H	-	421.13	3	n/a
M421T351	0.122641	0.00554698	0.004329	0.0180308	0.0134018	1.64542	exp:con	0.112981	HMDB0157574	[(2R,15S)-5,13-dihydroxy-2,15-dimethyl-14-oxotetracyclo[8.7.0.0²,⁷.0¹¹,¹⁵]heptadec-7-en-9-yl]oxidanesulfonic acid	n/a	C19H28O7S	400.156	M+Na-2H	-	421.13	3	n/a
M421T351	0.122641	0.00554698	0.004329	0.0180308	0.0134018	1.64542	exp:con	0.112981	HMDB0157573	[(2R,15S)-9,13-dihydroxy-2,15-dimethyl-14-oxotetracyclo[8.7.0.0²,⁷.0¹¹,¹⁵]heptadec-7-en-5-yl]oxidanesulfonic acid	n/a	C19H28O7S	400.156	M+Na-2H	-	421.13	3	n/a
M421T351	0.122641	0.00554698	0.004329	0.0180308	0.0134018	1.64542	exp:con	0.112981	HMDB0156621	[(2S,15S)-13-hydroxy-15-(hydroxymethyl)-2-methyl-3-oxotetracyclo[8.7.0.0²,⁷.0¹¹,¹⁵]heptadec-4-en-5-yl]oxidanesulfonic acid	n/a	C19H28O7S	400.156	M+Na-2H	-	421.13	3	n/a
M421T351	0.122641	0.00554698	0.004329	0.0180308	0.0134018	1.64542	exp:con	0.112981	HMDB0156620	[(2S,15R)-13-hydroxy-2-(hydroxymethyl)-15-methyl-3-oxotetracyclo[8.7.0.0²,⁷.0¹¹,¹⁵]heptadec-4-en-5-yl]oxidanesulfonic acid	n/a	C19H28O7S	400.156	M+Na-2H	-	421.13	3	n/a
M421T351	0.122641	0.00554698	0.004329	0.0180308	0.0134018	1.64542	exp:con	0.112981	HMDB0156619	[(2R,15R)-8,13-dihydroxy-2,15-dimethyl-3-oxotetracyclo[8.7.0.0²,⁷.0¹¹,¹⁵]heptadec-4-en-5-yl]oxidanesulfonic acid	n/a	C19H28O7S	400.156	M+Na-2H	-	421.13	3	n/a
M421T351	0.122641	0.00554698	0.004329	0.0180308	0.0134018	1.64542	exp:con	0.112981	HMDB0156617	[(2S,15S)-13,17-dihydroxy-2,15-dimethyl-3-oxotetracyclo[8.7.0.0²,⁷.0¹¹,¹⁵]heptadec-4-en-5-yl]oxidanesulfonic acid	n/a	C19H28O7S	400.156	M+Na-2H	-	421.13	3	n/a
M421T351	0.122641	0.00554698	0.004329	0.0180308	0.0134018	1.64542	exp:con	0.112981	HMDB0186138	[(2S,15S)-12-hydroxy-2,15-dimethyl-14,17-dioxotetracyclo[8.7.0.0²,⁷.0¹¹,¹⁵]heptadecan-5-yl]oxidanesulfonic acid	n/a	C19H28O7S	400.156	M+Na-2H	-	421.13	3	n/a
M421T351	0.122641	0.00554698	0.004329	0.0180308	0.0134018	1.64542	exp:con	0.112981	HMDB0157577	[(2R,15S)-13-hydroxy-15-(hydroxymethyl)-2-methyl-14-oxotetracyclo[8.7.0.0²,⁷.0¹¹,¹⁵]heptadec-7-en-5-yl]oxidanesulfonic acid	n/a	C19H28O7S	400.156	M+Na-2H	-	421.13	3	n/a
M421T351	0.122641	0.00554698	0.004329	0.0180308	0.0134018	1.64542	exp:con	0.112981	HMDB0157579	[(2R,15S)-12,13-dihydroxy-2,15-dimethyl-14-oxotetracyclo[8.7.0.0²,⁷.0¹¹,¹⁵]heptadec-7-en-5-yl]oxidanesulfonic acid	n/a	C19H28O7S	400.156	M+Na-2H	-	421.13	3	n/a
M421T351	0.122641	0.00554698	0.004329	0.0180308	0.0134018	1.64542	exp:con	0.112981	HMDB0157575	[(2R,15S)-13,17-dihydroxy-2,15-dimethyl-14-oxotetracyclo[8.7.0.0²,⁷.0¹¹,¹⁵]heptadec-7-en-5-yl]oxidanesulfonic acid	n/a	C19H28O7S	400.156	M+Na-2H	-	421.13	3	n/a
M421T351	0.122641	0.00554698	0.004329	0.0180308	0.0134018	1.64542	exp:con	0.112981	HMDB0186140	[(2S,15R)-16-hydroxy-2,15-dimethyl-14,17-dioxotetracyclo[8.7.0.0²,⁷.0¹¹,¹⁵]heptadecan-5-yl]oxidanesulfonic acid	n/a	C19H28O7S	400.156	M+Na-2H	-	421.13	3	n/a
M421T351	0.122641	0.00554698	0.004329	0.0180308	0.0134018	1.64542	exp:con	0.112981	HMDB0186139	[(2S,15S)-1-hydroxy-2,15-dimethyl-14,17-dioxotetracyclo[8.7.0.0²,⁷.0¹¹,¹⁵]heptadecan-5-yl]oxidanesulfonic acid	n/a	C19H28O7S	400.156	M+Na-2H	-	421.13	3	n/a
M421T351	0.122641	0.00554698	0.004329	0.0180308	0.0134018	1.64542	exp:con	0.112981	HMDB0186141	[(2S,15R)-5-hydroxy-2,15-dimethyl-14,17-dioxotetracyclo[8.7.0.0²,⁷.0¹¹,¹⁵]heptadecan-16-yl]oxidanesulfonic acid	n/a	C19H28O7S	400.156	M+Na-2H	-	421.13	3	n/a
M421T351	0.122641	0.00554698	0.004329	0.0180308	0.0134018	1.64542	exp:con	0.112981	HMDB0186136	[(2R,15S)-2-(hydroxymethyl)-15-methyl-14,17-dioxotetracyclo[8.7.0.0²,⁷.0¹¹,¹⁵]heptadecan-5-yl]oxidanesulfonic acid	n/a	C19H28O7S	400.156	M+Na-2H	-	421.13	3	n/a
M421T351	0.122641	0.00554698	0.004329	0.0180308	0.0134018	1.64542	exp:con	0.112981	HMDB0186135	[(2S,15S)-13-hydroxy-2,15-dimethyl-14,17-dioxotetracyclo[8.7.0.0²,⁷.0¹¹,¹⁵]heptadecan-5-yl]oxidanesulfonic acid	n/a	C19H28O7S	400.156	M+Na-2H	-	421.13	3	n/a
M421T351	0.122641	0.00554698	0.004329	0.0180308	0.0134018	1.64542	exp:con	0.112981	HMDB0186137	[(2S,15S)-15-(hydroxymethyl)-2-methyl-14,17-dioxotetracyclo[8.7.0.0²,⁷.0¹¹,¹⁵]heptadecan-5-yl]oxidanesulfonic acid	n/a	C19H28O7S	400.156	M+Na-2H	-	421.13	3	n/a
M421T351	0.122641	0.00554698	0.004329	0.0180308	0.0134018	1.64542	exp:con	0.112981	HMDB0164500	[4-(5-hydroxy-3-oxododec-11-en-1-yl)-2-methoxyphenyl]oxidanesulfonic acid	n/a	C19H28O7S	400.156	M+Na-2H	-	421.13	3	n/a
M421T351	0.122641	0.00554698	0.004329	0.0180308	0.0134018	1.64542	exp:con	0.112981	HMDB0164501	{[1-(4-hydroxy-3-methoxyphenyl)-3-oxododec-11-en-5-yl]oxy}sulfonic acid	n/a	C19H28O7S	400.156	M+Na-2H	-	421.13	3	n/a
M421T351	0.122641	0.00554698	0.004329	0.0180308	0.0134018	1.64542	exp:con	0.112981	HMDB0159873	[(2R,15S)-13,14-dihydroxy-2,15-dimethyl-5-oxotetracyclo[8.7.0.0²,⁷.0¹¹,¹⁵]heptadec-7-en-9-yl]oxidanesulfonic acid	n/a	C19H28O7S	400.156	M+Na-2H	-	421.13	3	n/a
M421T351	0.122641	0.00554698	0.004329	0.0180308	0.0134018	1.64542	exp:con	0.112981	HMDB0158292	[(1S,2S,10S,11S,15R)-5,17-dihydroxy-2,15-dimethyl-3-oxotetracyclo[8.7.0.0²,⁷.0¹¹,¹⁵]heptadec-4-en-13-yl]oxidanesulfonic acid	n/a	C19H28O7S	400.156	M+Na-2H	-	421.13	3	n/a
M421T351	0.122641	0.00554698	0.004329	0.0180308	0.0134018	1.64542	exp:con	0.112981	HMDB0124791	6,7-dihydroxy-2-[6-hydroxy-2,4-dimethoxy-3-(3-methylbut-2-en-1-yl)phenyl]-3,4-dihydro-2H-1-benzopyran-4-one	n/a	C22H24O7	400.152	M+Na-2H	-	421.127	5	n/a
M421T351	0.122641	0.00554698	0.004329	0.0180308	0.0134018	1.64542	exp:con	0.112981	HMDB0124790	2-[2,3-dihydroxy-4,6-dimethoxy-5-(3-methylbut-2-en-1-yl)phenyl]-7-hydroxy-3,4-dihydro-2H-1-benzopyran-4-one	n/a	C22H24O7	400.152	M+Na-2H	-	421.127	5	n/a
M421T351	0.122641	0.00554698	0.004329	0.0180308	0.0134018	1.64542	exp:con	0.112981	HMDB0134570	3,4,5-trihydroxy-6-[3-(2-phenylcyclobutyl)phenoxy]oxane-2-carboxylic acid	n/a	C22H24O7	400.152	M+Na-2H	-	421.127	5	n/a
M421T351	0.122641	0.00554698	0.004329	0.0180308	0.0134018	1.64542	exp:con	0.112981	HMDB0135575	3,4,5-trihydroxy-6-[4-(3-phenylbut-3-en-1-yl)phenoxy]oxane-2-carboxylic acid	n/a	C22H24O7	400.152	M+Na-2H	-	421.127	5	n/a
M421T351	0.122641	0.00554698	0.004329	0.0180308	0.0134018	1.64542	exp:con	0.112981	HMDB0135573	3,4,5-trihydroxy-6-[3-(3-phenylbut-3-en-1-yl)phenoxy]oxane-2-carboxylic acid	n/a	C22H24O7	400.152	M+Na-2H	-	421.127	5	n/a
M421T351	0.122641	0.00554698	0.004329	0.0180308	0.0134018	1.64542	exp:con	0.112981	HMDB0135569	3,4,5-trihydroxy-6-[4-(4-phenylbut-1-en-2-yl)phenoxy]oxane-2-carboxylic acid	n/a	C22H24O7	400.152	M+Na-2H	-	421.127	5	n/a
M421T351	0.122641	0.00554698	0.004329	0.0180308	0.0134018	1.64542	exp:con	0.112981	HMDB0135567	6-[(1,3-diphenylbut-3-en-1-yl)oxy]-3,4,5-trihydroxyoxane-2-carboxylic acid	n/a	C22H24O7	400.152	M+Na-2H	-	421.127	5	n/a
M421T351	0.122641	0.00554698	0.004329	0.0180308	0.0134018	1.64542	exp:con	0.112981	HMDB0135565	3,4,5-trihydroxy-6-[2-(4-phenylbut-1-en-2-yl)phenoxy]oxane-2-carboxylic acid	n/a	C22H24O7	400.152	M+Na-2H	-	421.127	5	n/a
M421T351	0.122641	0.00554698	0.004329	0.0180308	0.0134018	1.64542	exp:con	0.112981	HMDB0135563	6-[(1,3-diphenylbut-3-en-2-yl)oxy]-3,4,5-trihydroxyoxane-2-carboxylic acid	n/a	C22H24O7	400.152	M+Na-2H	-	421.127	5	n/a
M421T351	0.122641	0.00554698	0.004329	0.0180308	0.0134018	1.64542	exp:con	0.112981	HMDB0135566	3,4,5-trihydroxy-6-[2-(3-phenylbut-3-en-1-yl)phenoxy]oxane-2-carboxylic acid	n/a	C22H24O7	400.152	M+Na-2H	-	421.127	5	n/a
M421T351	0.122641	0.00554698	0.004329	0.0180308	0.0134018	1.64542	exp:con	0.112981	HMDB0134574	6-(1,2-diphenylcyclobutoxy)-3,4,5-trihydroxyoxane-2-carboxylic acid	n/a	C22H24O7	400.152	M+Na-2H	-	421.127	5	n/a
M421T351	0.122641	0.00554698	0.004329	0.0180308	0.0134018	1.64542	exp:con	0.112981	HMDB0134572	3,4,5-trihydroxy-6-[4-(2-phenylcyclobutyl)phenoxy]oxane-2-carboxylic acid	n/a	C22H24O7	400.152	M+Na-2H	-	421.127	5	n/a
M421T351	0.122641	0.00554698	0.004329	0.0180308	0.0134018	1.64542	exp:con	0.112981	HMDB0134569	3,4,5-trihydroxy-6-[2-(2-phenylcyclobutyl)phenoxy]oxane-2-carboxylic acid	n/a	C22H24O7	400.152	M+Na-2H	-	421.127	5	n/a
M421T351	0.122641	0.00554698	0.004329	0.0180308	0.0134018	1.64542	exp:con	0.112981	HMDB0135571	3,4,5-trihydroxy-6-[3-(4-phenylbut-1-en-2-yl)phenoxy]oxane-2-carboxylic acid	n/a	C22H24O7	400.152	M+Na-2H	-	421.127	5	n/a
M421T351	0.122641	0.00554698	0.004329	0.0180308	0.0134018	1.64542	exp:con	0.112981	HMDB0033258	Isoyatein	n/a	C22H24O7	400.152	M+Na-2H	-	421.127	5	n/a
M421T351	0.122641	0.00554698	0.004329	0.0180308	0.0134018	1.64542	exp:con	0.112981	HMDB0029869	Hemiariensin	n/a	C22H24O7	400.152	M+Na-2H	-	421.127	5	n/a
M421T351	0.122641	0.00554698	0.004329	0.0180308	0.0134018	1.64542	exp:con	0.112981	HMDB0041307	Italipyrone	n/a	C22H24O7	400.152	M+Na-2H	-	421.127	5	n/a
M440T118	0.165091	0.000599968	0.0021645	0.00376315	0.0078766	1.83503	exp:con	0.104953	HMDB0179357	2-amino-4-({1-[(carboxymethyl)-C-hydroxycarbonimidoyl]-2-{[(4E)-6-hydroxy-1-oxohex-4-en-3-yl]sulfanyl}ethyl}-C-hydroxycarbonimidoyl)butanoic acid	n/a	C16H25N3O8S	419.136	M+Na-2H	-	440.111	4	n/a
M440T118	0.165091	0.000599968	0.0021645	0.00376315	0.0078766	1.83503	exp:con	0.104953	HMDB0179360	2-amino-4-({1-[(carboxymethyl)-C-hydroxycarbonimidoyl]-2-{[(4E)-2-hydroxy-1-oxohex-4-en-3-yl]sulfanyl}ethyl}-C-hydroxycarbonimidoyl)butanoic acid	n/a	C16H25N3O8S	419.136	M+Na-2H	-	440.111	4	n/a
M440T118	0.165091	0.000599968	0.0021645	0.00376315	0.0078766	1.83503	exp:con	0.104953	HMDB0179359	2-amino-4-({1-[(carboxymethyl)-C-hydroxycarbonimidoyl]-2-{[(4E)-3-hydroxy-1-oxohex-4-en-2-yl]sulfanyl}ethyl}-C-hydroxycarbonimidoyl)butanoic acid	n/a	C16H25N3O8S	419.136	M+Na-2H	-	440.111	4	n/a
M440T118	0.165091	0.000599968	0.0021645	0.00376315	0.0078766	1.83503	exp:con	0.104953	HMDB0179363	2-amino-4-({1-[(carboxymethyl)-C-hydroxycarbonimidoyl]-2-{[1-(3-methyloxiran-2-yl)-3-oxopropyl]sulfanyl}ethyl}-C-hydroxycarbonimidoyl)butanoic acid	n/a	C16H25N3O8S	419.136	M+Na-2H	-	440.111	4	n/a
M440T118	0.165091	0.000599968	0.0021645	0.00376315	0.0078766	1.83503	exp:con	0.104953	HMDB0179362	2-amino-4-({1-[(carboxymethyl)-C-hydroxycarbonimidoyl]-2-{[(4Z)-3-hydroxy-6-oxohex-4-en-2-yl]sulfanyl}ethyl}-C-hydroxycarbonimidoyl)butanoic acid	n/a	C16H25N3O8S	419.136	M+Na-2H	-	440.111	4	n/a
M440T118	0.165091	0.000599968	0.0021645	0.00376315	0.0078766	1.83503	exp:con	0.104953	HMDB0179361	2-amino-4-({1-[(carboxymethyl)-C-hydroxycarbonimidoyl]-2-{[(4Z)-2-hydroxy-6-oxohex-4-en-3-yl]sulfanyl}ethyl}-C-hydroxycarbonimidoyl)butanoic acid	n/a	C16H25N3O8S	419.136	M+Na-2H	-	440.111	4	n/a
M455T392_1	0.162006	0.000908661	0.0021645	0.00502155	0.0078766	1.76261	exp:con	0.122523	HMDB0146349	{[3,7-dimethyl-1-({7-oxo-7H-furo[3,2-g]chromen-4-yl}oxy)octa-2,6-dien-4-yl]oxy}sulfonic acid	n/a	C21H22O8S	434.104	M+Na-2H	-	455.078	4	n/a
M455T392_1	0.162006	0.000908661	0.0021645	0.00502155	0.0078766	1.76261	exp:con	0.122523	HMDB0146351	{[(2Z)-6-methyl-2-[2-({7-oxo-7H-furo[3,2-g]chromen-4-yl}oxy)ethylidene]hept-5-en-1-yl]oxy}sulfonic acid	n/a	C21H22O8S	434.104	M+Na-2H	-	455.078	4	n/a
M455T392_1	0.162006	0.000908661	0.0021645	0.00502155	0.0078766	1.76261	exp:con	0.122523	HMDB0140779	[3-(2-hydroxy-4-methoxyphenyl)-8,8-dimethyl-2H,3H,4H,8H-pyrano[2,3-f]chromen-4-yl]oxidanesulfonic acid	n/a	C21H22O8S	434.104	M+Na-2H	-	455.078	4	n/a
M455T392_1	0.162006	0.000908661	0.0021645	0.00502155	0.0078766	1.76261	exp:con	0.122523	HMDB0140777	{[3-(2-hydroxy-4-methoxyphenyl)-8-methyl-2H,3H,4H,8H-pyrano[2,3-f]chromen-8-yl]methoxy}sulfonic acid	n/a	C21H22O8S	434.104	M+Na-2H	-	455.078	4	n/a
M455T392_1	0.162006	0.000908661	0.0021645	0.00502155	0.0078766	1.76261	exp:con	0.122523	HMDB0140772	(3-{8,8-dimethyl-2H,3H,4H,8H-pyrano[2,3-f]chromen-3-yl}-2-hydroxy-6-methoxyphenyl)oxidanesulfonic acid	n/a	C21H22O8S	434.104	M+Na-2H	-	455.078	4	n/a
M455T392_1	0.162006	0.000908661	0.0021645	0.00502155	0.0078766	1.76261	exp:con	0.122523	HMDB0146353	{[2,6-dimethyl-8-({7-oxo-7H-furo[3,2-g]chromen-4-yl}oxy)octa-2,6-dien-1-yl]oxy}sulfonic acid	n/a	C21H22O8S	434.104	M+Na-2H	-	455.078	4	n/a
M455T392_1	0.162006	0.000908661	0.0021645	0.00502155	0.0078766	1.76261	exp:con	0.122523	HMDB0146355	{[(2E)-2,6-dimethyl-8-({7-oxo-7H-furo[3,2-g]chromen-4-yl}oxy)octa-2,6-dien-1-yl]oxy}sulfonic acid	n/a	C21H22O8S	434.104	M+Na-2H	-	455.078	4	n/a
M455T392_1	0.162006	0.000908661	0.0021645	0.00502155	0.0078766	1.76261	exp:con	0.122523	HMDB0146357	{[2,6-dimethyl-8-({7-oxo-7H-furo[3,2-g]chromen-4-yl}oxy)octa-2,6-dien-4-yl]oxy}sulfonic acid	n/a	C21H22O8S	434.104	M+Na-2H	-	455.078	4	n/a
M455T392_1	0.162006	0.000908661	0.0021645	0.00502155	0.0078766	1.76261	exp:con	0.122523	HMDB0148189	{4-[7-hydroxy-5-methoxy-8-(3-methylbut-2-en-1-yl)-4-oxo-3,4-dihydro-2H-1-benzopyran-2-yl]phenyl}oxidanesulfonic acid	n/a	C21H22O8S	434.104	M+Na-2H	-	455.078	4	n/a
M455T392_1	0.162006	0.000908661	0.0021645	0.00502155	0.0078766	1.76261	exp:con	0.122523	HMDB0148206	{3-[7-hydroxy-5-methoxy-8-(3-methylbut-2-en-1-yl)-4-oxo-3,4-dihydro-2H-1-benzopyran-2-yl]phenyl}oxidanesulfonic acid	n/a	C21H22O8S	434.104	M+Na-2H	-	455.078	4	n/a
M455T392_1	0.162006	0.000908661	0.0021645	0.00502155	0.0078766	1.76261	exp:con	0.122523	HMDB0149236	[7-hydroxy-3-(5-methoxy-1,1-dimethyl-1H-isochromen-6-yl)-3,4-dihydro-2H-1-benzopyran-4-yl]oxidanesulfonic acid	n/a	C21H22O8S	434.104	M+Na-2H	-	455.078	4	n/a
M455T392_1	0.162006	0.000908661	0.0021645	0.00502155	0.0078766	1.76261	exp:con	0.122523	HMDB0149239	{[6-(7-hydroxy-3,4-dihydro-2H-1-benzopyran-3-yl)-5-methoxy-1-methyl-1H-isochromen-1-yl]methoxy}sulfonic acid	n/a	C21H22O8S	434.104	M+Na-2H	-	455.078	4	n/a
M455T392_1	0.162006	0.000908661	0.0021645	0.00502155	0.0078766	1.76261	exp:con	0.122523	HMDB0140762	[3-(4-hydroxy-2-methoxyphenyl)-8,8-dimethyl-2H,3H,4H,8H-pyrano[2,3-f]chromen-4-yl]oxidanesulfonic acid	n/a	C21H22O8S	434.104	M+Na-2H	-	455.078	4	n/a
M455T392_1	0.162006	0.000908661	0.0021645	0.00502155	0.0078766	1.76261	exp:con	0.122523	HMDB0140757	{[3-(4-hydroxy-2-methoxyphenyl)-8-methyl-2H,3H,4H,8H-pyrano[2,3-f]chromen-8-yl]methoxy}sulfonic acid	n/a	C21H22O8S	434.104	M+Na-2H	-	455.078	4	n/a
M455T392_1	0.162006	0.000908661	0.0021645	0.00502155	0.0078766	1.76261	exp:con	0.122523	HMDB0125833	[5-hydroxy-7-methoxy-2,2-dimethyl-6-(3-phenylprop-2-enoyl)-3,4-dihydro-2H-1-benzopyran-4-yl]oxidanesulfonic acid	n/a	C21H22O8S	434.104	M+Na-2H	-	455.078	4	n/a
M455T392_1	0.162006	0.000908661	0.0021645	0.00502155	0.0078766	1.76261	exp:con	0.122523	HMDB0125889	{2-hydroxy-5-[3-(5-methoxy-2,2-dimethyl-2H-chromen-6-yl)propanoyl]phenyl}oxidanesulfonic acid	n/a	C21H22O8S	434.104	M+Na-2H	-	455.078	4	n/a
M455T392_1	0.162006	0.000908661	0.0021645	0.00502155	0.0078766	1.76261	exp:con	0.122523	HMDB0125893	{4-[3-(7-hydroxy-5-methoxy-2,2-dimethyl-2H-chromen-6-yl)propanoyl]phenyl}oxidanesulfonic acid	n/a	C21H22O8S	434.104	M+Na-2H	-	455.078	4	n/a
M455T392_1	0.162006	0.000908661	0.0021645	0.00502155	0.0078766	1.76261	exp:con	0.122523	HMDB0125899	({6-[3-(4-hydroxyphenyl)-3-oxopropyl]-5-methoxy-2-methyl-2H-chromen-2-yl}methoxy)sulfonic acid	n/a	C21H22O8S	434.104	M+Na-2H	-	455.078	4	n/a
M455T392_1	0.162006	0.000908661	0.0021645	0.00502155	0.0078766	1.76261	exp:con	0.122523	HMDB0125898	(4-{3-[2-(hydroxymethyl)-5-methoxy-2-methyl-2H-chromen-6-yl]propanoyl}phenyl)oxidanesulfonic acid	n/a	C21H22O8S	434.104	M+Na-2H	-	455.078	4	n/a
M455T392_1	0.162006	0.000908661	0.0021645	0.00502155	0.0078766	1.76261	exp:con	0.122523	HMDB0125901	{4-[3-hydroxy-3-(5-methoxy-2,2-dimethyl-2H-chromen-6-yl)propanoyl]phenyl}oxidanesulfonic acid	n/a	C21H22O8S	434.104	M+Na-2H	-	455.078	4	n/a
M455T392_1	0.162006	0.000908661	0.0021645	0.00502155	0.0078766	1.76261	exp:con	0.122523	HMDB0125902	[3-(4-hydroxyphenyl)-1-(5-methoxy-2,2-dimethyl-2H-chromen-6-yl)-3-oxopropoxy]sulfonic acid	n/a	C21H22O8S	434.104	M+Na-2H	-	455.078	4	n/a
M455T392_1	0.162006	0.000908661	0.0021645	0.00502155	0.0078766	1.76261	exp:con	0.122523	HMDB0125911	[4-(3-{11-methoxy-5,5-dimethyl-3,6-dioxatricyclo[5.4.0.0²,⁴]undeca-1(7),8,10-trien-10-yl}propanoyl)phenyl]oxidanesulfonic acid	n/a	C21H22O8S	434.104	M+Na-2H	-	455.078	4	n/a
M455T392_1	0.162006	0.000908661	0.0021645	0.00502155	0.0078766	1.76261	exp:con	0.122523	HMDB0133812	[(4-{14-hydroxy-5-methoxy-8,17-dioxatetracyclo[8.7.0.0²,⁷.0¹¹,¹⁶]heptadeca-2(7),3,5,11(16),12,14-hexaen-4-yl}-2-methylbut-2-en-1-yl)oxy]sulfonic acid	n/a	C21H22O8S	434.104	M+Na-2H	-	455.078	4	n/a
M455T392_1	0.162006	0.000908661	0.0021645	0.00502155	0.0078766	1.76261	exp:con	0.122523	HMDB0135867	[(4-{5-hydroxy-14-methoxy-8,17-dioxatetracyclo[8.7.0.0²,⁷.0¹¹,¹⁶]heptadeca-2(7),3,5,11(16),12,14-hexaen-6-yl}-2-methylbut-2-en-1-yl)oxy]sulfonic acid	n/a	C21H22O8S	434.104	M+Na-2H	-	455.078	4	n/a
M455T392_1	0.162006	0.000908661	0.0021645	0.00502155	0.0078766	1.76261	exp:con	0.122523	HMDB0140749	(3-{8,8-dimethyl-2H,3H,4H,8H-pyrano[2,3-f]chromen-3-yl}-6-hydroxy-2-methoxyphenyl)oxidanesulfonic acid	n/a	C21H22O8S	434.104	M+Na-2H	-	455.078	4	n/a
M455T392_1	0.162006	0.000908661	0.0021645	0.00502155	0.0078766	1.76261	exp:con	0.122523	HMDB0162550	5-{3-[(6-carboxy-3,4,5-trihydroxyoxan-2-yl)oxy]-5-methoxyphenyl}-1-chloro-2-hydroxy-4-oxopentan-1-ide	n/a	C18H22ClO10	433.091	M+Na-2H	-	455.073	8	n/a
M495T162	0.0867715	1.17e-05	0.0021645	0.000327559	0.0078766	2.30175	exp:con	0.0561626	HMDB0030085	Pubescenol	n/a	C28H42O6	474.298	M+Na-2H	-	495.273	10	n/a
M495T162	0.0867715	1.17e-05	0.0021645	0.000327559	0.0078766	2.30175	exp:con	0.0561626	HMDB0165757	6-(1-{3,5-dihydroxy-2,15-dimethyltetracyclo[8.7.0.0²,⁷.0¹¹,¹⁵]heptadec-7-en-14-yl}-2-hydroxyethyl)-3-(hydroxymethyl)-4-methyl-5,6-dihydro-2H-pyran-2-one	n/a	C28H42O6	474.298	M+Na-2H	-	495.273	10	n/a
M495T162	0.0867715	1.17e-05	0.0021645	0.000327559	0.0078766	2.30175	exp:con	0.0561626	HMDB0165758	3-(hydroxymethyl)-4-methyl-6-(1-{3,5,17-trihydroxy-2,15-dimethyltetracyclo[8.7.0.0²,⁷.0¹¹,¹⁵]heptadec-7-en-14-yl}ethyl)-5,6-dihydro-2H-pyran-2-one	n/a	C28H42O6	474.298	M+Na-2H	-	495.273	10	n/a
M495T162	0.0867715	1.17e-05	0.0021645	0.000327559	0.0078766	2.30175	exp:con	0.0561626	HMDB0167764	15-[1-(4,5-dimethyl-6-oxooxan-2-yl)-1-hydroxyethyl]-5-hydroxy-10,14-dimethyl-3-oxapentacyclo[9.7.0.0²,⁴.0⁵,¹⁰.0¹⁴,¹⁸]octadecan-9-one	n/a	C28H42O6	474.298	M+Na-2H	-	495.273	10	n/a
M503T137	8.16928	6.54e-06	0.0021645	0.000237839	0.0078766	1.95061	exp:con	1.93e-06	HMDB0170878	6-{[2,8-dihydroxy-2-(hydroxymethyl)-6-methoxy-4-oxo-2H,3H,4H-naphtho[2,3-b]pyran-5-yl]oxy}-3,4,5-trihydroxyoxane-2-carboxylic acid	n/a	C21H22O13	482.106	M+Na-2H	-	503.081	5	n/a
M503T137	8.16928	6.54e-06	0.0021645	0.000237839	0.0078766	1.95061	exp:con	1.93e-06	HMDB0152990	6-{3,5-dihydroxy-4-[3-(2,3,4-trihydroxyphenyl)propanoyl]phenoxy}-3,4,5-trihydroxyoxane-2-carboxylic acid	n/a	C21H22O13	482.106	M+Na-2H	-	503.081	5	n/a
M503T137	8.16928	6.54e-06	0.0021645	0.000237839	0.0078766	1.95061	exp:con	1.93e-06	HMDB0152986	6-{2,3-dihydroxy-6-[3-oxo-3-(2,4,6-trihydroxyphenyl)propyl]phenoxy}-3,4,5-trihydroxyoxane-2-carboxylic acid	n/a	C21H22O13	482.106	M+Na-2H	-	503.081	5	n/a
M503T137	8.16928	6.54e-06	0.0021645	0.000237839	0.0078766	1.95061	exp:con	1.93e-06	HMDB0152989	6-{3,5-dihydroxy-2-[3-(2,3,4-trihydroxyphenyl)propanoyl]phenoxy}-3,4,5-trihydroxyoxane-2-carboxylic acid	n/a	C21H22O13	482.106	M+Na-2H	-	503.081	5	n/a
M503T137	8.16928	6.54e-06	0.0021645	0.000237839	0.0078766	1.95061	exp:con	1.93e-06	HMDB0152988	6-{2,3-dihydroxy-4-[3-oxo-3-(2,4,6-trihydroxyphenyl)propyl]phenoxy}-3,4,5-trihydroxyoxane-2-carboxylic acid	n/a	C21H22O13	482.106	M+Na-2H	-	503.081	5	n/a
M503T137	8.16928	6.54e-06	0.0021645	0.000237839	0.0078766	1.95061	exp:con	1.93e-06	HMDB0152987	6-{2,6-dihydroxy-3-[3-oxo-3-(2,4,6-trihydroxyphenyl)propyl]phenoxy}-3,4,5-trihydroxyoxane-2-carboxylic acid	n/a	C21H22O13	482.106	M+Na-2H	-	503.081	5	n/a
M503T137	8.16928	6.54e-06	0.0021645	0.000237839	0.0078766	1.95061	exp:con	1.93e-06	HMDB0147878	6-{2,3-dihydroxy-4-[1-oxo-1-(2,4,6-trihydroxyphenyl)propan-2-yl]phenoxy}-3,4,5-trihydroxyoxane-2-carboxylic acid	n/a	C21H22O13	482.106	M+Na-2H	-	503.081	5	n/a
M503T137	8.16928	6.54e-06	0.0021645	0.000237839	0.0078766	1.95061	exp:con	1.93e-06	HMDB0147876	6-{3,5-dihydroxy-4-[2-(2,3,4-trihydroxyphenyl)propanoyl]phenoxy}-3,4,5-trihydroxyoxane-2-carboxylic acid	n/a	C21H22O13	482.106	M+Na-2H	-	503.081	5	n/a
M503T137	8.16928	6.54e-06	0.0021645	0.000237839	0.0078766	1.95061	exp:con	1.93e-06	HMDB0147877	6-{2,3-dihydroxy-6-[1-oxo-1-(2,4,6-trihydroxyphenyl)propan-2-yl]phenoxy}-3,4,5-trihydroxyoxane-2-carboxylic acid	n/a	C21H22O13	482.106	M+Na-2H	-	503.081	5	n/a
M503T137	8.16928	6.54e-06	0.0021645	0.000237839	0.0078766	1.95061	exp:con	1.93e-06	HMDB0147875	6-{3,5-dihydroxy-2-[2-(2,3,4-trihydroxyphenyl)propanoyl]phenoxy}-3,4,5-trihydroxyoxane-2-carboxylic acid	n/a	C21H22O13	482.106	M+Na-2H	-	503.081	5	n/a
M503T137	8.16928	6.54e-06	0.0021645	0.000237839	0.0078766	1.95061	exp:con	1.93e-06	HMDB0147874	6-{2,6-dihydroxy-3-[1-oxo-1-(2,4,6-trihydroxyphenyl)propan-2-yl]phenoxy}-3,4,5-trihydroxyoxane-2-carboxylic acid	n/a	C21H22O13	482.106	M+Na-2H	-	503.081	5	n/a
M503T137	8.16928	6.54e-06	0.0021645	0.000237839	0.0078766	1.95061	exp:con	1.93e-06	HMDB0147863	6-{3,5-dihydroxy-2-[2-(2,4,5-trihydroxyphenyl)propanoyl]phenoxy}-3,4,5-trihydroxyoxane-2-carboxylic acid	n/a	C21H22O13	482.106	M+Na-2H	-	503.081	5	n/a
M503T137	8.16928	6.54e-06	0.0021645	0.000237839	0.0078766	1.95061	exp:con	1.93e-06	HMDB0147865	6-{4,5-dihydroxy-2-[1-oxo-1-(2,4,6-trihydroxyphenyl)propan-2-yl]phenoxy}-3,4,5-trihydroxyoxane-2-carboxylic acid	n/a	C21H22O13	482.106	M+Na-2H	-	503.081	5	n/a
M503T137	8.16928	6.54e-06	0.0021645	0.000237839	0.0078766	1.95061	exp:con	1.93e-06	HMDB0147866	6-{2,5-dihydroxy-4-[1-oxo-1-(2,4,6-trihydroxyphenyl)propan-2-yl]phenoxy}-3,4,5-trihydroxyoxane-2-carboxylic acid	n/a	C21H22O13	482.106	M+Na-2H	-	503.081	5	n/a
M503T137	8.16928	6.54e-06	0.0021645	0.000237839	0.0078766	1.95061	exp:con	1.93e-06	HMDB0153013	6-{3,5-dihydroxy-2-[3-(3,4,5-trihydroxyphenyl)propanoyl]phenoxy}-3,4,5-trihydroxyoxane-2-carboxylic acid	n/a	C21H22O13	482.106	M+Na-2H	-	503.081	5	n/a
M503T137	8.16928	6.54e-06	0.0021645	0.000237839	0.0078766	1.95061	exp:con	1.93e-06	HMDB0153012	6-{2,6-dihydroxy-4-[3-oxo-3-(2,4,6-trihydroxyphenyl)propyl]phenoxy}-3,4,5-trihydroxyoxane-2-carboxylic acid	n/a	C21H22O13	482.106	M+Na-2H	-	503.081	5	n/a
M503T137	8.16928	6.54e-06	0.0021645	0.000237839	0.0078766	1.95061	exp:con	1.93e-06	HMDB0170877	6-{[2,5-dihydroxy-2-(hydroxymethyl)-6-methoxy-4-oxo-2H,3H,4H-naphtho[2,3-b]pyran-8-yl]oxy}-3,4,5-trihydroxyoxane-2-carboxylic acid	n/a	C21H22O13	482.106	M+Na-2H	-	503.081	5	n/a
M503T137	8.16928	6.54e-06	0.0021645	0.000237839	0.0078766	1.95061	exp:con	1.93e-06	HMDB0170875	3,4,5-trihydroxy-6-({2,3,8-trihydroxy-6-methoxy-2-methyl-4-oxo-2H,3H,4H-naphtho[2,3-b]pyran-5-yl}oxy)oxane-2-carboxylic acid	n/a	C21H22O13	482.106	M+Na-2H	-	503.081	5	n/a
M503T137	8.16928	6.54e-06	0.0021645	0.000237839	0.0078766	1.95061	exp:con	1.93e-06	HMDB0170874	3,4,5-trihydroxy-6-({2,3,5-trihydroxy-6-methoxy-2-methyl-4-oxo-2H,3H,4H-naphtho[2,3-b]pyran-8-yl}oxy)oxane-2-carboxylic acid	n/a	C21H22O13	482.106	M+Na-2H	-	503.081	5	n/a
M503T137	8.16928	6.54e-06	0.0021645	0.000237839	0.0078766	1.95061	exp:con	1.93e-06	HMDB0170873	3,4,5-trihydroxy-6-({2,7,8-trihydroxy-6-methoxy-2-methyl-4-oxo-2H,3H,4H-naphtho[2,3-b]pyran-5-yl}oxy)oxane-2-carboxylic acid	n/a	C21H22O13	482.106	M+Na-2H	-	503.081	5	n/a
M503T137	8.16928	6.54e-06	0.0021645	0.000237839	0.0078766	1.95061	exp:con	1.93e-06	HMDB0170872	3,4,5-trihydroxy-6-({2,5,7-trihydroxy-6-methoxy-2-methyl-4-oxo-2H,3H,4H-naphtho[2,3-b]pyran-8-yl}oxy)oxane-2-carboxylic acid	n/a	C21H22O13	482.106	M+Na-2H	-	503.081	5	n/a
M503T137	8.16928	6.54e-06	0.0021645	0.000237839	0.0078766	1.95061	exp:con	1.93e-06	HMDB0170871	3,4,5-trihydroxy-6-({2,5,8-trihydroxy-6-methoxy-2-methyl-4-oxo-2H,3H,4H-naphtho[2,3-b]pyran-7-yl}oxy)oxane-2-carboxylic acid	n/a	C21H22O13	482.106	M+Na-2H	-	503.081	5	n/a
M503T137	8.16928	6.54e-06	0.0021645	0.000237839	0.0078766	1.95061	exp:con	1.93e-06	HMDB0153030	6-{2,5-dihydroxy-4-[3-oxo-3-(2,4,6-trihydroxyphenyl)propyl]phenoxy}-3,4,5-trihydroxyoxane-2-carboxylic acid	n/a	C21H22O13	482.106	M+Na-2H	-	503.081	5	n/a
M503T137	8.16928	6.54e-06	0.0021645	0.000237839	0.0078766	1.95061	exp:con	1.93e-06	HMDB0153032	6-{3,5-dihydroxy-4-[3-(2,4,5-trihydroxyphenyl)propanoyl]phenoxy}-3,4,5-trihydroxyoxane-2-carboxylic acid	n/a	C21H22O13	482.106	M+Na-2H	-	503.081	5	n/a
M503T137	8.16928	6.54e-06	0.0021645	0.000237839	0.0078766	1.95061	exp:con	1.93e-06	HMDB0153031	6-{3,5-dihydroxy-2-[3-(2,4,5-trihydroxyphenyl)propanoyl]phenoxy}-3,4,5-trihydroxyoxane-2-carboxylic acid	n/a	C21H22O13	482.106	M+Na-2H	-	503.081	5	n/a
M503T137	8.16928	6.54e-06	0.0021645	0.000237839	0.0078766	1.95061	exp:con	1.93e-06	HMDB0153029	6-{2,4-dihydroxy-5-[3-oxo-3-(2,4,6-trihydroxyphenyl)propyl]phenoxy}-3,4,5-trihydroxyoxane-2-carboxylic acid	n/a	C21H22O13	482.106	M+Na-2H	-	503.081	5	n/a
M503T137	8.16928	6.54e-06	0.0021645	0.000237839	0.0078766	1.95061	exp:con	1.93e-06	HMDB0153028	6-{4,5-dihydroxy-2-[3-oxo-3-(2,4,6-trihydroxyphenyl)propyl]phenoxy}-3,4,5-trihydroxyoxane-2-carboxylic acid	n/a	C21H22O13	482.106	M+Na-2H	-	503.081	5	n/a
M503T137	8.16928	6.54e-06	0.0021645	0.000237839	0.0078766	1.95061	exp:con	1.93e-06	HMDB0153014	6-{3,5-dihydroxy-4-[3-(3,4,5-trihydroxyphenyl)propanoyl]phenoxy}-3,4,5-trihydroxyoxane-2-carboxylic acid	n/a	C21H22O13	482.106	M+Na-2H	-	503.081	5	n/a
M503T137	8.16928	6.54e-06	0.0021645	0.000237839	0.0078766	1.95061	exp:con	1.93e-06	HMDB0153011	6-{2,3-dihydroxy-5-[3-oxo-3-(2,4,6-trihydroxyphenyl)propyl]phenoxy}-3,4,5-trihydroxyoxane-2-carboxylic acid	n/a	C21H22O13	482.106	M+Na-2H	-	503.081	5	n/a
M503T137	8.16928	6.54e-06	0.0021645	0.000237839	0.0078766	1.95061	exp:con	1.93e-06	HMDB0147864	6-{3,5-dihydroxy-4-[2-(2,4,5-trihydroxyphenyl)propanoyl]phenoxy}-3,4,5-trihydroxyoxane-2-carboxylic acid	n/a	C21H22O13	482.106	M+Na-2H	-	503.081	5	n/a
M503T137	8.16928	6.54e-06	0.0021645	0.000237839	0.0078766	1.95061	exp:con	1.93e-06	HMDB0147862	6-{2,4-dihydroxy-5-[1-oxo-1-(2,4,6-trihydroxyphenyl)propan-2-yl]phenoxy}-3,4,5-trihydroxyoxane-2-carboxylic acid	n/a	C21H22O13	482.106	M+Na-2H	-	503.081	5	n/a
M503T137	8.16928	6.54e-06	0.0021645	0.000237839	0.0078766	1.95061	exp:con	1.93e-06	HMDB0146368	3,4,5-trihydroxy-6-{[2-hydroxy-4-(7-methoxy-2-oxo-2H-chromen-8-yl)-3,6-dioxabicyclo[3.1.0]hexan-1-yl]methoxy}oxane-2-carboxylic acid	n/a	C21H22O13	482.106	M+Na-2H	-	503.081	5	n/a
M503T137	8.16928	6.54e-06	0.0021645	0.000237839	0.0078766	1.95061	exp:con	1.93e-06	HMDB0132002	6-{2-[3-(3,4-dihydroxyphenyl)propanoyl]-3,4,5-trihydroxyphenoxy}-3,4,5-trihydroxyoxane-2-carboxylic acid	n/a	C21H22O13	482.106	M+Na-2H	-	503.081	5	n/a
M503T137	8.16928	6.54e-06	0.0021645	0.000237839	0.0078766	1.95061	exp:con	1.93e-06	HMDB0132001	3,4,5-trihydroxy-6-{2-hydroxy-5-[3-oxo-3-(2,3,4,6-tetrahydroxyphenyl)propyl]phenoxy}oxane-2-carboxylic acid	n/a	C21H22O13	482.106	M+Na-2H	-	503.081	5	n/a
M503T137	8.16928	6.54e-06	0.0021645	0.000237839	0.0078766	1.95061	exp:con	1.93e-06	HMDB0132000	3,4,5-trihydroxy-6-{2-hydroxy-4-[3-oxo-3-(2,3,4,6-tetrahydroxyphenyl)propyl]phenoxy}oxane-2-carboxylic acid	n/a	C21H22O13	482.106	M+Na-2H	-	503.081	5	n/a
M503T137	8.16928	6.54e-06	0.0021645	0.000237839	0.0078766	1.95061	exp:con	1.93e-06	HMDB0041638	(-)-Epigallocatechin 3'-glucuronide	n/a	C21H22O13	482.106	M+Na-2H	-	503.081	5	n/a
M503T137	8.16928	6.54e-06	0.0021645	0.000237839	0.0078766	1.95061	exp:con	1.93e-06	HMDB0041639	(-)-Epigallocatechin 3-glucuronide	n/a	C21H22O13	482.106	M+Na-2H	-	503.081	5	n/a
M503T137	8.16928	6.54e-06	0.0021645	0.000237839	0.0078766	1.95061	exp:con	1.93e-06	HMDB0041640	(-)-Epigallocatechin 7-glucuronide	n/a	C21H22O13	482.106	M+Na-2H	-	503.081	5	n/a
M503T137	8.16928	6.54e-06	0.0021645	0.000237839	0.0078766	1.95061	exp:con	1.93e-06	HMDB0040623	3'-(6''-Galloylglucosyl)-phloroacetophenone	n/a	C21H22O13	482.106	M+Na-2H	-	503.081	5	n/a
M503T137	8.16928	6.54e-06	0.0021645	0.000237839	0.0078766	1.95061	exp:con	1.93e-06	HMDB0132003	6-{2-[3-(3,4-dihydroxyphenyl)propanoyl]-3,5,6-trihydroxyphenoxy}-3,4,5-trihydroxyoxane-2-carboxylic acid	n/a	C21H22O13	482.106	M+Na-2H	-	503.081	5	n/a
M503T137	8.16928	6.54e-06	0.0021645	0.000237839	0.0078766	1.95061	exp:con	1.93e-06	HMDB0132004	6-{3-[3-(3,4-dihydroxyphenyl)propanoyl]-2,4,6-trihydroxyphenoxy}-3,4,5-trihydroxyoxane-2-carboxylic acid	n/a	C21H22O13	482.106	M+Na-2H	-	503.081	5	n/a
M503T137	8.16928	6.54e-06	0.0021645	0.000237839	0.0078766	1.95061	exp:con	1.93e-06	HMDB0146366	3,4,5-trihydroxy-6-[(8-{4-hydroxy-5-methyl-3,6-dioxabicyclo[3.1.0]hexan-2-yl}-7-methoxy-2-oxo-2H-chromen-6-yl)oxy]oxane-2-carboxylic acid	n/a	C21H22O13	482.106	M+Na-2H	-	503.081	5	n/a
M503T137	8.16928	6.54e-06	0.0021645	0.000237839	0.0078766	1.95061	exp:con	1.93e-06	HMDB0141559	6-{[3,5-dihydroxy-2-(3,4,5-trihydroxyphenyl)-3,4-dihydro-2H-1-benzopyran-7-yl]oxy}-3,4,5-trihydroxyoxane-2-carboxylic acid	n/a	C21H22O13	482.106	M+Na-2H	-	503.081	5	n/a
M503T137	8.16928	6.54e-06	0.0021645	0.000237839	0.0078766	1.95061	exp:con	1.93e-06	HMDB0141558	6-[2,3-dihydroxy-5-(3,5,7-trihydroxy-3,4-dihydro-2H-1-benzopyran-2-yl)phenoxy]-3,4,5-trihydroxyoxane-2-carboxylic acid	n/a	C21H22O13	482.106	M+Na-2H	-	503.081	5	n/a
M503T137	8.16928	6.54e-06	0.0021645	0.000237839	0.0078766	1.95061	exp:con	1.93e-06	HMDB0137843	3,4,5-trihydroxy-6-{5-hydroxy-2-[1-oxo-1-(2,3,4,6-tetrahydroxyphenyl)propan-2-yl]phenoxy}oxane-2-carboxylic acid	n/a	C21H22O13	482.106	M+Na-2H	-	503.081	5	n/a
M503T137	8.16928	6.54e-06	0.0021645	0.000237839	0.0078766	1.95061	exp:con	1.93e-06	HMDB0137844	3,4,5-trihydroxy-6-{3-hydroxy-4-[1-oxo-1-(2,3,4,6-tetrahydroxyphenyl)propan-2-yl]phenoxy}oxane-2-carboxylic acid	n/a	C21H22O13	482.106	M+Na-2H	-	503.081	5	n/a
M503T137	8.16928	6.54e-06	0.0021645	0.000237839	0.0078766	1.95061	exp:con	1.93e-06	HMDB0137841	6-{2-[2-(2,4-dihydroxyphenyl)propanoyl]-3,4,5-trihydroxyphenoxy}-3,4,5-trihydroxyoxane-2-carboxylic acid	n/a	C21H22O13	482.106	M+Na-2H	-	503.081	5	n/a
M503T137	8.16928	6.54e-06	0.0021645	0.000237839	0.0078766	1.95061	exp:con	1.93e-06	HMDB0137839	6-{3-[2-(2,4-dihydroxyphenyl)propanoyl]-2,4,6-trihydroxyphenoxy}-3,4,5-trihydroxyoxane-2-carboxylic acid	n/a	C21H22O13	482.106	M+Na-2H	-	503.081	5	n/a
M503T137	8.16928	6.54e-06	0.0021645	0.000237839	0.0078766	1.95061	exp:con	1.93e-06	HMDB0137840	6-{4-[2-(2,4-dihydroxyphenyl)propanoyl]-2,3,5-trihydroxyphenoxy}-3,4,5-trihydroxyoxane-2-carboxylic acid	n/a	C21H22O13	482.106	M+Na-2H	-	503.081	5	n/a
M503T137	8.16928	6.54e-06	0.0021645	0.000237839	0.0078766	1.95061	exp:con	1.93e-06	HMDB0137842	6-{2-[2-(2,4-dihydroxyphenyl)propanoyl]-3,5,6-trihydroxyphenoxy}-3,4,5-trihydroxyoxane-2-carboxylic acid	n/a	C21H22O13	482.106	M+Na-2H	-	503.081	5	n/a
M503T137	8.16928	6.54e-06	0.0021645	0.000237839	0.0078766	1.95061	exp:con	1.93e-06	HMDB0136108	6-{[2-(3,5-dihydroxyphenyl)-3,4,5-trihydroxy-3,4-dihydro-2H-1-benzopyran-7-yl]oxy}-3,4,5-trihydroxyoxane-2-carboxylic acid	n/a	C21H22O13	482.106	M+Na-2H	-	503.081	5	n/a
M503T137	8.16928	6.54e-06	0.0021645	0.000237839	0.0078766	1.95061	exp:con	1.93e-06	HMDB0136107	6-{[2-(3,5-dihydroxyphenyl)-3,4,7-trihydroxy-3,4-dihydro-2H-1-benzopyran-5-yl]oxy}-3,4,5-trihydroxyoxane-2-carboxylic acid	n/a	C21H22O13	482.106	M+Na-2H	-	503.081	5	n/a
M503T137	8.16928	6.54e-06	0.0021645	0.000237839	0.0078766	1.95061	exp:con	1.93e-06	HMDB0136106	3,4,5-trihydroxy-6-[3-hydroxy-5-(3,4,5,7-tetrahydroxy-3,4-dihydro-2H-1-benzopyran-2-yl)phenoxy]oxane-2-carboxylic acid	n/a	C21H22O13	482.106	M+Na-2H	-	503.081	5	n/a
M503T137	8.16928	6.54e-06	0.0021645	0.000237839	0.0078766	1.95061	exp:con	1.93e-06	HMDB0132005	6-{4-[3-(3,4-dihydroxyphenyl)propanoyl]-2,3,5-trihydroxyphenoxy}-3,4,5-trihydroxyoxane-2-carboxylic acid	n/a	C21H22O13	482.106	M+Na-2H	-	503.081	5	n/a
M503T137	8.16928	6.54e-06	0.0021645	0.000237839	0.0078766	1.95061	exp:con	1.93e-06	HMDB0040622	3'-(2''-Galloylglucosyl)-phloroacetophenone	n/a	C21H22O13	482.106	M+Na-2H	-	503.081	5	n/a
M533T136	14.9849	5.48e-09	0.0021645	3.36e-06	0.0078766	2.49705	exp:con	0.0532494	HMDB0163663	6-({2-[(5,8-dioxo-5,8-dihydronaphthalen-1-yl)oxy]-4,5-dihydroxy-6-(hydroxymethyl)oxan-3-yl}oxy)-3,4,5-trihydroxyoxane-2-carboxylic acid	n/a	C22H24O14	512.117	M+Na-2H	-	533.091	3	n/a
M533T136	14.9849	5.48e-09	0.0021645	3.36e-06	0.0078766	2.49705	exp:con	0.0532494	HMDB0151220	6-{[5,7-dihydroxy-2-(1-hydroxy-4-oxocyclohexyl)-6-methoxy-4-oxo-4H-chromen-8-yl]oxy}-3,4,5-trihydroxyoxane-2-carboxylic acid	n/a	C22H24O14	512.117	M+Na-2H	-	533.091	3	n/a
M533T136	14.9849	5.48e-09	0.0021645	3.36e-06	0.0078766	2.49705	exp:con	0.0532494	HMDB0151219	6-{[5,8-dihydroxy-2-(1-hydroxy-4-oxocyclohexyl)-6-methoxy-4-oxo-4H-chromen-7-yl]oxy}-3,4,5-trihydroxyoxane-2-carboxylic acid	n/a	C22H24O14	512.117	M+Na-2H	-	533.091	3	n/a
M533T136	14.9849	5.48e-09	0.0021645	3.36e-06	0.0078766	2.49705	exp:con	0.0532494	HMDB0151218	6-{[7,8-dihydroxy-2-(1-hydroxy-4-oxocyclohexyl)-6-methoxy-4-oxo-4H-chromen-5-yl]oxy}-3,4,5-trihydroxyoxane-2-carboxylic acid	n/a	C22H24O14	512.117	M+Na-2H	-	533.091	3	n/a
M533T136	14.9849	5.48e-09	0.0021645	3.36e-06	0.0078766	2.49705	exp:con	0.0532494	HMDB0152342	6-{[3,5-dihydroxy-2-(1-hydroxy-3-methoxy-4-oxocyclohexyl)-4-oxo-4H-chromen-7-yl]oxy}-3,4,5-trihydroxyoxane-2-carboxylic acid	n/a	C22H24O14	512.117	M+Na-2H	-	533.091	3	n/a
M533T136	14.9849	5.48e-09	0.0021645	3.36e-06	0.0078766	2.49705	exp:con	0.0532494	HMDB0152343	6-{[3,7-dihydroxy-2-(1-hydroxy-3-methoxy-4-oxocyclohexyl)-4-oxo-4H-chromen-5-yl]oxy}-3,4,5-trihydroxyoxane-2-carboxylic acid	n/a	C22H24O14	512.117	M+Na-2H	-	533.091	3	n/a
M533T136	14.9849	5.48e-09	0.0021645	3.36e-06	0.0078766	2.49705	exp:con	0.0532494	HMDB0152344	6-{[5,7-dihydroxy-2-(1-hydroxy-3-methoxy-4-oxocyclohexyl)-4-oxo-4H-chromen-3-yl]oxy}-3,4,5-trihydroxyoxane-2-carboxylic acid	n/a	C22H24O14	512.117	M+Na-2H	-	533.091	3	n/a
M533T136	14.9849	5.48e-09	0.0021645	3.36e-06	0.0078766	2.49705	exp:con	0.0532494	HMDB0163662	6-({2-[(5,8-dioxo-5,8-dihydronaphthalen-1-yl)oxy]-3,5-dihydroxy-6-(hydroxymethyl)oxan-4-yl}oxy)-3,4,5-trihydroxyoxane-2-carboxylic acid	n/a	C22H24O14	512.117	M+Na-2H	-	533.091	3	n/a
M533T136	14.9849	5.48e-09	0.0021645	3.36e-06	0.0078766	2.49705	exp:con	0.0532494	HMDB0163661	6-({6-[(5,8-dioxo-5,8-dihydronaphthalen-1-yl)oxy]-4,5-dihydroxy-2-(hydroxymethyl)oxan-3-yl}oxy)-3,4,5-trihydroxyoxane-2-carboxylic acid	n/a	C22H24O14	512.117	M+Na-2H	-	533.091	3	n/a
M533T136	14.9849	5.48e-09	0.0021645	3.36e-06	0.0078766	2.49705	exp:con	0.0532494	HMDB0163664	6-({6-[(5,8-dioxo-5,8-dihydronaphthalen-1-yl)oxy]-3,4,5-trihydroxyoxan-2-yl}methoxy)-3,4,5-trihydroxyoxane-2-carboxylic acid	n/a	C22H24O14	512.117	M+Na-2H	-	533.091	3	n/a
M533T136	14.9849	5.48e-09	0.0021645	3.36e-06	0.0078766	2.49705	exp:con	0.0532494	HMDB0147643	6-(4-{[(2E)-3-(3,4-dihydroxyphenyl)prop-2-enoyl]oxy}-3,5-dihydroxycyclohex-1-ene-1-carbonyloxy)-3,4,5-trihydroxyoxane-2-carboxylic acid	n/a	C22H24O14	512.117	M+Na-2H	-	533.091	3	n/a
M533T136	14.9849	5.48e-09	0.0021645	3.36e-06	0.0078766	2.49705	exp:con	0.0532494	HMDB0147642	6-{5-[(1E)-3-[(4-carboxy-2,6-dihydroxycyclohex-3-en-1-yl)oxy]-3-oxoprop-1-en-1-yl]-2-hydroxyphenoxy}-3,4,5-trihydroxyoxane-2-carboxylic acid	n/a	C22H24O14	512.117	M+Na-2H	-	533.091	3	n/a
M533T136	14.9849	5.48e-09	0.0021645	3.36e-06	0.0078766	2.49705	exp:con	0.0532494	HMDB0147641	6-{4-[(1E)-3-[(4-carboxy-2,6-dihydroxycyclohex-3-en-1-yl)oxy]-3-oxoprop-1-en-1-yl]-2-hydroxyphenoxy}-3,4,5-trihydroxyoxane-2-carboxylic acid	n/a	C22H24O14	512.117	M+Na-2H	-	533.091	3	n/a
M533T136	14.9849	5.48e-09	0.0021645	3.36e-06	0.0078766	2.49705	exp:con	0.0532494	HMDB0130151	6-{4-[(1E)-3-[(3-carboxy-5,6-dihydroxycyclohex-3-en-1-yl)oxy]-3-oxoprop-1-en-1-yl]-2-hydroxyphenoxy}-3,4,5-trihydroxyoxane-2-carboxylic acid	n/a	C22H24O14	512.117	M+Na-2H	-	533.091	3	n/a
M533T136	14.9849	5.48e-09	0.0021645	3.36e-06	0.0078766	2.49705	exp:con	0.0532494	HMDB0130152	6-{5-[(1E)-3-[(3-carboxy-5,6-dihydroxycyclohex-3-en-1-yl)oxy]-3-oxoprop-1-en-1-yl]-2-hydroxyphenoxy}-3,4,5-trihydroxyoxane-2-carboxylic acid	n/a	C22H24O14	512.117	M+Na-2H	-	533.091	3	n/a
M533T136	14.9849	5.48e-09	0.0021645	3.36e-06	0.0078766	2.49705	exp:con	0.0532494	HMDB0130153	6-(5-{[(2E)-3-(3,4-dihydroxyphenyl)prop-2-enoyl]oxy}-3,4-dihydroxycyclohex-1-ene-1-carbonyloxy)-3,4,5-trihydroxyoxane-2-carboxylic acid	n/a	C22H24O14	512.117	M+Na-2H	-	533.091	3	n/a
M533T136	14.9849	5.48e-09	0.0021645	3.36e-06	0.0078766	2.49705	exp:con	0.0532494	HMDB0132085	6-{[2-(1,3-dihydroxy-4-oxocyclohexyl)-6-hydroxy-7-methoxy-4-oxo-4H-chromen-5-yl]oxy}-3,4,5-trihydroxyoxane-2-carboxylic acid	n/a	C22H24O14	512.117	M+Na-2H	-	533.091	3	n/a
M533T136	14.9849	5.48e-09	0.0021645	3.36e-06	0.0078766	2.49705	exp:con	0.0532494	HMDB0132086	6-{[2-(1,3-dihydroxy-4-oxocyclohexyl)-5-hydroxy-7-methoxy-4-oxo-4H-chromen-6-yl]oxy}-3,4,5-trihydroxyoxane-2-carboxylic acid	n/a	C22H24O14	512.117	M+Na-2H	-	533.091	3	n/a
M533T136	14.9849	5.48e-09	0.0021645	3.36e-06	0.0078766	2.49705	exp:con	0.0532494	HMDB0132192	6-{[3,5-dihydroxy-2-(1-hydroxy-4-oxocyclohexyl)-8-methoxy-4-oxo-4H-chromen-7-yl]oxy}-3,4,5-trihydroxyoxane-2-carboxylic acid	n/a	C22H24O14	512.117	M+Na-2H	-	533.091	3	n/a
M533T136	14.9849	5.48e-09	0.0021645	3.36e-06	0.0078766	2.49705	exp:con	0.0532494	HMDB0132193	6-{[3,7-dihydroxy-2-(1-hydroxy-4-oxocyclohexyl)-8-methoxy-4-oxo-4H-chromen-5-yl]oxy}-3,4,5-trihydroxyoxane-2-carboxylic acid	n/a	C22H24O14	512.117	M+Na-2H	-	533.091	3	n/a
M533T136	14.9849	5.48e-09	0.0021645	3.36e-06	0.0078766	2.49705	exp:con	0.0532494	HMDB0132194	6-{[5,7-dihydroxy-2-(1-hydroxy-4-oxocyclohexyl)-8-methoxy-4-oxo-4H-chromen-3-yl]oxy}-3,4,5-trihydroxyoxane-2-carboxylic acid	n/a	C22H24O14	512.117	M+Na-2H	-	533.091	3	n/a
M533T136	14.9849	5.48e-09	0.0021645	3.36e-06	0.0078766	2.49705	exp:con	0.0532494	HMDB0150915	2'-(3,4-dihydroxyphenyl)-4',6,6'-trihydroxy-4-[(E)-2-(4-hydroxyphenyl)ethenyl]-2H,2'H-3,3'-spirobi[[1]benzofuran]-2-one	n/a	C29H20O9	512.111	M+Na-2H	-	533.085	8	n/a
M533T136	14.9849	5.48e-09	0.0021645	3.36e-06	0.0078766	2.49705	exp:con	0.0532494	HMDB0150916	4',6,6'-trihydroxy-2'-(4-hydroxyphenyl)-4-[3-(4-hydroxyphenyl)oxiran-2-yl]-2H,2'H-3,3'-spirobi[[1]benzofuran]-2-one	n/a	C29H20O9	512.111	M+Na-2H	-	533.085	8	n/a
M533T136	14.9849	5.48e-09	0.0021645	3.36e-06	0.0078766	2.49705	exp:con	0.0532494	HMDB0150912	4',5,6,6'-tetrahydroxy-2'-(4-hydroxyphenyl)-4-[(E)-2-(4-hydroxyphenyl)ethenyl]-2H,2'H-3,3'-spirobi[[1]benzofuran]-2-one	n/a	C29H20O9	512.111	M+Na-2H	-	533.085	8	n/a
M533T136	14.9849	5.48e-09	0.0021645	3.36e-06	0.0078766	2.49705	exp:con	0.0532494	HMDB0150913	4-[(E)-2-(3,4-dihydroxyphenyl)ethenyl]-4',6,6'-trihydroxy-2'-(4-hydroxyphenyl)-2H,2'H-3,3'-spirobi[[1]benzofuran]-2-one	n/a	C29H20O9	512.111	M+Na-2H	-	533.085	8	n/a
M533T136	14.9849	5.48e-09	0.0021645	3.36e-06	0.0078766	2.49705	exp:con	0.0532494	HMDB0150914	4-[(E)-2-(2,4-dihydroxyphenyl)ethenyl]-4',6,6'-trihydroxy-2'-(4-hydroxyphenyl)-2H,2'H-3,3'-spirobi[[1]benzofuran]-2-one	n/a	C29H20O9	512.111	M+Na-2H	-	533.085	8	n/a
M533T136	14.9849	5.48e-09	0.0021645	3.36e-06	0.0078766	2.49705	exp:con	0.0532494	HMDB0150911	4',5',6,6'-tetrahydroxy-2'-(4-hydroxyphenyl)-4-[(E)-2-(4-hydroxyphenyl)ethenyl]-2H,2'H-3,3'-spirobi[[1]benzofuran]-2-one	n/a	C29H20O9	512.111	M+Na-2H	-	533.085	8	n/a
M545T100	2.21136	0.00189963	0.0021645	0.00831809	0.0078766	1.3058	exp:con	0.146083	HMDB0156364	[5-(2,6-dihydroxy-9H-purin-9-yl)-4-hydroxy-2-({[hydroxy(phosphonooxy)phosphoryl]oxy}methyl)oxolan-3-yl]oxidanesulfonic acid	n/a	C10H14N4O15P2S	523.965	M+Na-2H	-	544.94	9	n/a
M545T100	2.21136	0.00189963	0.0021645	0.00831809	0.0078766	1.3058	exp:con	0.146083	HMDB0156363	[2-(2,6-dihydroxy-9H-purin-9-yl)-4-hydroxy-5-({[hydroxy(phosphonooxy)phosphoryl]oxy}methyl)oxolan-3-yl]oxidanesulfonic acid	n/a	C10H14N4O15P2S	523.965	M+Na-2H	-	544.94	9	n/a
M545T100	2.21136	0.00189963	0.0021645	0.00831809	0.0078766	1.3058	exp:con	0.146083	HMDB0000293	Xanthosine 5-triphosphate	C00700	C10H15N4O15P3	523.975	M+Na-2H	-	544.949	9	map00230 Purine metabolism;
M563T248	3.17846	0.000500673	0.0021645	0.00332266	0.0078766	1.13787	exp:con	3.33e-11	HMDB0173115	[14-(3,4-dihydroxy-6-methyl-5-methylideneheptan-2-yl)-4-hydroxy-2,15-dimethyl-8-oxotetracyclo[8.7.0.0²,⁷.0¹¹,¹⁵]heptadecan-5-yl]oxidanesulfonic acid	n/a	C28H46O8S	542.291	M+Na-2H	-	563.266	7	n/a
M630T52	0.0495165	0.00176247	0.0021645	0.00789587	0.0078766	2.25646	exp:con	0.107242	HMDB0060056	CE(15:1)	n/a	C42H72O2	608.553	M+Na-2H	-	629.528	8	n/a
M633T97	0.24097	0.00572983	0.0021645	0.0184999	0.0078766	1.47736	exp:con	0.0155256	HMDB0154393	8-[2-hydroxy-1-(2,4,6-trihydroxyphenyl)-3-(3,4,5-trihydroxyphenyl)propyl]-2-(3,4,5-trihydroxyphenyl)-3,4-dihydro-2H-1-benzopyran-3,5,7-triol	n/a	C30H28O14	612.148	M+Na-2H	-	633.123	3	n/a
M633T97	0.24097	0.00572983	0.0021645	0.0184999	0.0078766	1.47736	exp:con	0.0155256	HMDB0138916	6-{3-[5-(5,7-dihydroxy-4-oxo-3,4-dihydro-2H-1-benzopyran-2-yl)-7-hydroxy-3-(hydroxymethyl)-2,3-dihydro-1-benzofuran-2-yl]phenoxy}-3,4,5-trihydroxyoxane-2-carboxylic acid	n/a	C30H28O14	612.148	M+Na-2H	-	633.123	3	n/a
M633T97	0.24097	0.00572983	0.0021645	0.0184999	0.0078766	1.47736	exp:con	0.0155256	HMDB0138915	6-{[5-(5,7-dihydroxy-4-oxo-3,4-dihydro-2H-1-benzopyran-2-yl)-3-(hydroxymethyl)-2-(3-hydroxyphenyl)-2,3-dihydro-1-benzofuran-7-yl]oxy}-3,4,5-trihydroxyoxane-2-carboxylic acid	n/a	C30H28O14	612.148	M+Na-2H	-	633.123	3	n/a
M633T97	0.24097	0.00572983	0.0021645	0.0184999	0.0078766	1.47736	exp:con	0.0155256	HMDB0138913	3,4,5-trihydroxy-6-({5-hydroxy-2-[7-hydroxy-3-(hydroxymethyl)-2-(3-hydroxyphenyl)-2,3-dihydro-1-benzofuran-5-yl]-4-oxo-3,4-dihydro-2H-1-benzopyran-7-yl}oxy)oxane-2-carboxylic acid	n/a	C30H28O14	612.148	M+Na-2H	-	633.123	3	n/a
M633T97	0.24097	0.00572983	0.0021645	0.0184999	0.0078766	1.47736	exp:con	0.0155256	HMDB0138914	3,4,5-trihydroxy-6-({7-hydroxy-2-[7-hydroxy-3-(hydroxymethyl)-2-(3-hydroxyphenyl)-2,3-dihydro-1-benzofuran-5-yl]-4-oxo-3,4-dihydro-2H-1-benzopyran-5-yl}oxy)oxane-2-carboxylic acid	n/a	C30H28O14	612.148	M+Na-2H	-	633.123	3	n/a
M633T97	0.24097	0.00572983	0.0021645	0.0184999	0.0078766	1.47736	exp:con	0.0155256	HMDB0003337	Oxidized glutathione	C00127	C20H32N6O12S2	612.152	M+Na-2H	-	633.127	4	map00480 Glutathione metabolism;map04216 Ferroptosis;map04918 Thyroid hormone synthesis;
M642T57	0.0795846	0.00119904	0.0021645	0.00601911	0.0078766	2.07632	exp:con	0.252354	HMDB0011671	PC(16:1(9Z)/22:0)	n/a	C15H22N5O16P3	621.027	M+Na-2H	-	642.002	4	n/a
M687T52	0.152228	0.000657592	0.0021645	0.00398932	0.0078766	1.87668	exp:con	0.0586917	HMDB0056196	DG(18:1n7/0:0/22:6n3)	n/a	C43H70O5	666.522	M+Na-2H	-	687.497	7	n/a
M687T52	0.152228	0.000657592	0.0021645	0.00398932	0.0078766	1.87668	exp:con	0.0586917	HMDB0056318	DG(20:2n6/0:0/20:5n3)	n/a	C43H70O5	666.522	M+Na-2H	-	687.497	7	n/a
M687T52	0.152228	0.000657592	0.0021645	0.00398932	0.0078766	1.87668	exp:con	0.0586917	HMDB0056215	DG(18:1n9/0:0/22:6n3)	n/a	C43H70O5	666.522	M+Na-2H	-	687.497	7	n/a
M687T52	0.152228	0.000657592	0.0021645	0.00398932	0.0078766	1.87668	exp:con	0.0586917	HMDB0056241	DG(20:3n9/0:0/20:4n6)	n/a	C43H70O5	666.522	M+Na-2H	-	687.497	7	n/a
M687T52	0.152228	0.000657592	0.0021645	0.00398932	0.0078766	1.87668	exp:con	0.0586917	HMDB0056247	DG(20:3n9/0:0/20:4n3)	n/a	C43H70O5	666.522	M+Na-2H	-	687.497	7	n/a
M687T52	0.152228	0.000657592	0.0021645	0.00398932	0.0078766	1.87668	exp:con	0.0586917	HMDB0056301	DG(18:3n6/0:0/22:4n6)	n/a	C43H70O5	666.522	M+Na-2H	-	687.497	7	n/a
M687T52	0.152228	0.000657592	0.0021645	0.00398932	0.0078766	1.87668	exp:con	0.0586917	HMDB0056322	DG(20:3n6/0:0/20:4n6)	n/a	C43H70O5	666.522	M+Na-2H	-	687.497	7	n/a
M687T52	0.152228	0.000657592	0.0021645	0.00398932	0.0078766	1.87668	exp:con	0.0586917	HMDB0056328	DG(20:3n6/0:0/20:4n3)	n/a	C43H70O5	666.522	M+Na-2H	-	687.497	7	n/a
M687T52	0.152228	0.000657592	0.0021645	0.00398932	0.0078766	1.87668	exp:con	0.0586917	HMDB0056353	DG(22:4n6/0:0/18:3n3)	n/a	C43H70O5	666.522	M+Na-2H	-	687.497	7	n/a
M687T52	0.152228	0.000657592	0.0021645	0.00398932	0.0078766	1.87668	exp:con	0.0586917	HMDB0007208	DG(18:1(11Z)/22:6(4Z,7Z,10Z,13Z,16Z,19Z)/0:0)	n/a	C43H70O5	666.522	M+Na-2H	-	687.497	7	n/a
M687T52	0.152228	0.000657592	0.0021645	0.00398932	0.0078766	1.87668	exp:con	0.0586917	HMDB0007545	DG(20:4(8Z,11Z,14Z,17Z)/20:3(5Z,8Z,11Z)/0:0)	n/a	C43H70O5	666.522	M+Na-2H	-	687.497	7	n/a
M687T52	0.152228	0.000657592	0.0021645	0.00398932	0.0078766	1.87668	exp:con	0.0586917	HMDB0007546	DG(20:4(8Z,11Z,14Z,17Z)/20:3(8Z,11Z,14Z)/0:0)	n/a	C43H70O5	666.522	M+Na-2H	-	687.497	7	n/a
M687T52	0.152228	0.000657592	0.0021645	0.00398932	0.0078766	1.87668	exp:con	0.0586917	HMDB0007573	DG(20:5(5Z,8Z,11Z,14Z,17Z)/20:2(11Z,14Z)/0:0)	n/a	C43H70O5	666.522	M+Na-2H	-	687.497	7	n/a
M687T52	0.152228	0.000657592	0.0021645	0.00398932	0.0078766	1.87668	exp:con	0.0586917	HMDB0007685	DG(22:4(7Z,10Z,13Z,16Z)/18:3(9Z,12Z,15Z)/0:0)	n/a	C43H70O5	666.522	M+Na-2H	-	687.497	7	n/a
M687T52	0.152228	0.000657592	0.0021645	0.00398932	0.0078766	1.87668	exp:con	0.0586917	HMDB0007684	DG(22:4(7Z,10Z,13Z,16Z)/18:3(6Z,9Z,12Z)/0:0)	n/a	C43H70O5	666.522	M+Na-2H	-	687.497	7	n/a
M687T52	0.152228	0.000657592	0.0021645	0.00398932	0.0078766	1.87668	exp:con	0.0586917	HMDB0007712	DG(22:5(4Z,7Z,10Z,13Z,16Z)/18:2(9Z,12Z)/0:0)	n/a	C43H70O5	666.522	M+Na-2H	-	687.497	7	n/a
M687T52	0.152228	0.000657592	0.0021645	0.00398932	0.0078766	1.87668	exp:con	0.0586917	HMDB0007741	DG(22:5(7Z,10Z,13Z,16Z,19Z)/18:2(9Z,12Z)/0:0)	n/a	C43H70O5	666.522	M+Na-2H	-	687.497	7	n/a
M687T52	0.152228	0.000657592	0.0021645	0.00398932	0.0078766	1.87668	exp:con	0.0586917	HMDB0007769	DG(22:6(4Z,7Z,10Z,13Z,16Z,19Z)/18:1(9Z)/0:0)	n/a	C43H70O5	666.522	M+Na-2H	-	687.497	7	n/a
M687T52	0.152228	0.000657592	0.0021645	0.00398932	0.0078766	1.87668	exp:con	0.0586917	HMDB0007768	DG(22:6(4Z,7Z,10Z,13Z,16Z,19Z)/18:1(11Z)/0:0)	n/a	C43H70O5	666.522	M+Na-2H	-	687.497	7	n/a
M687T52	0.152228	0.000657592	0.0021645	0.00398932	0.0078766	1.87668	exp:con	0.0586917	HMDB0007517	DG(20:4(5Z,8Z,11Z,14Z)/20:3(8Z,11Z,14Z)/0:0)	n/a	C43H70O5	666.522	M+Na-2H	-	687.497	7	n/a
M687T52	0.152228	0.000657592	0.0021645	0.00398932	0.0078766	1.87668	exp:con	0.0586917	HMDB0007516	DG(20:4(5Z,8Z,11Z,14Z)/20:3(5Z,8Z,11Z)/0:0)	n/a	C43H70O5	666.522	M+Na-2H	-	687.497	7	n/a
M687T52	0.152228	0.000657592	0.0021645	0.00398932	0.0078766	1.87668	exp:con	0.0586917	HMDB0007490	DG(20:3(8Z,11Z,14Z)/20:4(8Z,11Z,14Z,17Z)/0:0)	n/a	C43H70O5	666.522	M+Na-2H	-	687.497	7	n/a
M687T52	0.152228	0.000657592	0.0021645	0.00398932	0.0078766	1.87668	exp:con	0.0586917	HMDB0007237	DG(18:1(9Z)/22:6(4Z,7Z,10Z,13Z,16Z,19Z)/0:0)	n/a	C43H70O5	666.522	M+Na-2H	-	687.497	7	n/a
M687T52	0.152228	0.000657592	0.0021645	0.00398932	0.0078766	1.87668	exp:con	0.0586917	HMDB0007264	DG(18:2(9Z,12Z)/22:5(4Z,7Z,10Z,13Z,16Z)/0:0)	n/a	C43H70O5	666.522	M+Na-2H	-	687.497	7	n/a
M687T52	0.152228	0.000657592	0.0021645	0.00398932	0.0078766	1.87668	exp:con	0.0586917	HMDB0007265	DG(18:2(9Z,12Z)/22:5(7Z,10Z,13Z,16Z,19Z)/0:0)	n/a	C43H70O5	666.522	M+Na-2H	-	687.497	7	n/a
M687T52	0.152228	0.000657592	0.0021645	0.00398932	0.0078766	1.87668	exp:con	0.0586917	HMDB0007292	DG(18:3(6Z,9Z,12Z)/22:4(7Z,10Z,13Z,16Z)/0:0)	n/a	C43H70O5	666.522	M+Na-2H	-	687.497	7	n/a
M687T52	0.152228	0.000657592	0.0021645	0.00398932	0.0078766	1.87668	exp:con	0.0586917	HMDB0007321	DG(18:3(9Z,12Z,15Z)/22:4(7Z,10Z,13Z,16Z)/0:0)	n/a	C43H70O5	666.522	M+Na-2H	-	687.497	7	n/a
M687T52	0.152228	0.000657592	0.0021645	0.00398932	0.0078766	1.87668	exp:con	0.0586917	HMDB0007433	DG(20:2(11Z,14Z)/20:5(5Z,8Z,11Z,14Z,17Z)/0:0)	n/a	C43H70O5	666.522	M+Na-2H	-	687.497	7	n/a
M687T52	0.152228	0.000657592	0.0021645	0.00398932	0.0078766	1.87668	exp:con	0.0586917	HMDB0007460	DG(20:3(5Z,8Z,11Z)/20:4(5Z,8Z,11Z,14Z)/0:0)	n/a	C43H70O5	666.522	M+Na-2H	-	687.497	7	n/a
M687T52	0.152228	0.000657592	0.0021645	0.00398932	0.0078766	1.87668	exp:con	0.0586917	HMDB0007461	DG(20:3(5Z,8Z,11Z)/20:4(8Z,11Z,14Z,17Z)/0:0)	n/a	C43H70O5	666.522	M+Na-2H	-	687.497	7	n/a
M687T52	0.152228	0.000657592	0.0021645	0.00398932	0.0078766	1.87668	exp:con	0.0586917	HMDB0007489	DG(20:3(8Z,11Z,14Z)/20:4(5Z,8Z,11Z,14Z)/0:0)	n/a	C43H70O5	666.522	M+Na-2H	-	687.497	7	n/a
M700T97	2.20406	6.26e-05	0.0021645	0.00085321	0.0078766	1.20256	exp:con	0.163011	HMDB0011720	UDP-N-acetylmuraminate	C01050	C20H31N3O19P2	679.103	M+Na-2H	-	700.077	2	map00471 D-Glutamine and D-glutamate metabolism;map00520 Amino sugar and nucleotide sugar metabolism;map00550 Peptidoglycan biosynthesis;map01100 Metabolic pathways;
M721T52_1	0.271806	0.000248418	0.0021645	0.00208972	0.0078766	1.53343	exp:con	0.14198	HMDB0031983	Lucyobroside	n/a	C39H73NO9	699.529	M+Na-2H	-	720.503	4	n/a
M721T52_1	0.271806	0.000248418	0.0021645	0.00208972	0.0078766	1.53343	exp:con	0.14198	HMDB0032795	AS 1-2	n/a	C39H73NO9	699.529	M+Na-2H	-	720.503	4	n/a
M721T52_1	0.271806	0.000248418	0.0021645	0.00208972	0.0078766	1.53343	exp:con	0.14198	HMDB0011438	PE(P-18:1(9Z)/16:1(9Z))	n/a	C39H74NO7P	699.52	M+Na-2H	-	720.495	8	n/a
M721T52_1	0.271806	0.000248418	0.0021645	0.00208972	0.0078766	1.53343	exp:con	0.14198	HMDB0011405	PE(P-18:1(11Z)/16:1(9Z))	n/a	C39H74NO7P	699.52	M+Na-2H	-	720.495	8	n/a
M721T52_1	0.271806	0.000248418	0.0021645	0.00208972	0.0078766	1.53343	exp:con	0.14198	HMDB0011343	PE(P-16:0/18:2(9Z,12Z))	n/a	C39H74NO7P	699.52	M+Na-2H	-	720.495	8	n/a
M721T52_1	0.271806	0.000248418	0.0021645	0.00208972	0.0078766	1.53343	exp:con	0.14198	HMDB0009114	PE(18:2(9Z,12Z)/P-16:0)	n/a	C39H74NO7P	699.52	M+Na-2H	-	720.495	8	n/a
M721T52_1	0.271806	0.000248418	0.0021645	0.00208972	0.0078766	1.53343	exp:con	0.14198	HMDB0008985	PE(16:1(9Z)/P-18:1(9Z))	C00350	C39H74NO7P	699.52	M+Na-2H	-	720.495	8	map00563 Glycosylphosphatidylinositol (GPI)-anchor biosynthesis;map00564 Glycerophospholipid metabolism;map01100 Metabolic pathways;map01110 Biosynthesis of secondary metabolites;map04136 Autophagy - other;map04138 Autophagy - yeast;map04140 Autophagy - animal;map04723 Retrograde endocannabinoid signaling;map05130 Pathogenic Escherichia coli infection;map05167 Kaposi's sarcoma-associated herpesvi…
M721T52_1	0.271806	0.000248418	0.0021645	0.00208972	0.0078766	1.53343	exp:con	0.14198	HMDB0008984	PE(16:1(9Z)/P-18:1(11Z))	C00350	C39H74NO7P	699.52	M+Na-2H	-	720.495	8	map00563 Glycosylphosphatidylinositol (GPI)-anchor biosynthesis;map00564 Glycerophospholipid metabolism;map01100 Metabolic pathways;map01110 Biosynthesis of secondary metabolites;map04136 Autophagy - other;map04138 Autophagy - yeast;map04140 Autophagy - animal;map04723 Retrograde endocannabinoid signaling;map05130 Pathogenic Escherichia coli infection;map05167 Kaposi's sarcoma-associated herpesvi…
M793T65	0.161891	3.27e-05	0.0021645	0.00058877	0.0078766	1.98431	exp:con	0.0652378	HMDB0134693	2,3,4,7,8,9,15,21,22,23,28-undecahydroxy-14-(hydroxymethyl)-12,27,31,34-tetraoxo-13,25,32,35-tetraoxaoctacyclo[14.13.3.3¹⁷,²⁶.0⁵,³⁰.0⁶,¹¹.0¹⁸,²⁶.0¹⁹,²⁴.0²⁹,³³]pentatriaconta-1,3,5(30),6,8,10,19,21,23-nonaene-20-carboxylic acid	n/a	C33H24O22	772.076	M+Na-2H	-	793.051	2	n/a
M793T65	0.161891	3.27e-05	0.0021645	0.00058877	0.0078766	1.98431	exp:con	0.0652378	HMDB0134699	2,3,4,7,8,9,15,22,23,28,33-undecahydroxy-14-(hydroxymethyl)-12,27,31,34-tetraoxo-13,25,32,35-tetraoxaoctacyclo[14.13.3.3¹⁷,²⁶.0⁵,³⁰.0⁶,¹¹.0¹⁸,²⁶.0¹⁹,²⁴.0²⁹,³³]pentatriaconta-1,3,5(30),6,8,10,19(24),20,22-nonaene-20-carboxylic acid	n/a	C33H24O22	772.076	M+Na-2H	-	793.051	2	n/a
M793T65	0.161891	3.27e-05	0.0021645	0.00058877	0.0078766	1.98431	exp:con	0.0652378	HMDB0001459	Guanosine triphosphate adenosine	n/a	C20H27N10O17P3	772.077	M+Na-2H	-	793.052	3	n/a
M871T69	0.0935722	0.00252643	0.0021645	0.0102348	0.0078766	1.80392	exp:con	0.101061	HMDB0006901	Heme A	C15670	C49H56FeN4O6	852.355	M+Na-2H	-	871.315	3	map00860 Porphyrin and chlorophyll metabolism;map01100 Metabolic pathways;map01110 Biosynthesis of secondary metabolites;
M871T200	4.87269	8.43e-07	0.0021645	8.73e-05	0.0078766	1.7742	exp:con	2.13e-11	HMDB0034601	Hebevinoside XI	n/a	C46H74O14	850.508	M+Na-2H	-	871.483	0	n/a
M871T200	4.87269	8.43e-07	0.0021645	8.73e-05	0.0078766	1.7742	exp:con	2.13e-11	HMDB0035981	Hebevinoside V	n/a	C46H74O14	850.508	M+Na-2H	-	871.483	0	n/a
M879T133	0.201144	0.00059347	0.0021645	0.00374823	0.0078766	1.66887	exp:con	0.119988	HMDB0134225	4-{5-[(E)-2-[6-hydroxy-3-(3-hydroxyphenyl)-2-(4-hydroxyphenyl)-2,3-dihydro-1-benzofuran-4-yl]ethenyl]-2-(4-hydroxyphenyl)-2,3-dihydro-1-benzofuran-3-yl}-3-(3-hydroxyphenyl)-2-phenyl-2,3-dihydro-1-benzofuran-6-ol	n/a	C56H42O9	858.283	M+Na-2H	-	879.258	6	n/a
M879T133	0.201144	0.00059347	0.0021645	0.00374823	0.0078766	1.66887	exp:con	0.119988	HMDB0150020	10-(3-hydroxyphenyl)-9,22-bis(4-hydroxyphenyl)-3,14-diphenyl-8,23-dioxaheptacyclo[19.6.1.0²,¹³.0⁴,¹².0⁷,¹¹.0¹⁵,²⁰.0²⁴,²⁸]octacosa-1(28),4(12),5,7(11),15(20),16,18,24,26-nonaene-5,16,18,26-tetrol	n/a	C56H42O9	858.283	M+Na-2H	-	879.258	6	n/a
M879T133	0.201144	0.00059347	0.0021645	0.00374823	0.0078766	1.66887	exp:con	0.119988	HMDB0150019	10-(3-hydroxyphenyl)-9,14-bis(4-hydroxyphenyl)-3,22-diphenyl-8,23-dioxaheptacyclo[19.6.1.0²,¹³.0⁴,¹².0⁷,¹¹.0¹⁵,²⁰.0²⁴,²⁸]octacosa-1(28),4(12),5,7(11),15(20),16,18,24,26-nonaene-5,16,18,26-tetrol	n/a	C56H42O9	858.283	M+Na-2H	-	879.258	6	n/a
M879T133	0.201144	0.00059347	0.0021645	0.00374823	0.0078766	1.66887	exp:con	0.119988	HMDB0150022	10-(3-hydroxyphenyl)-3,9-bis(4-hydroxyphenyl)-14,22-diphenyl-8,23-dioxaheptacyclo[19.6.1.0²,¹³.0⁴,¹².0⁷,¹¹.0¹⁵,²⁰.0²⁴,²⁸]octacosa-1(28),4(12),5,7(11),15(20),16,18,24,26-nonaene-5,16,18,26-tetrol	n/a	C56H42O9	858.283	M+Na-2H	-	879.258	6	n/a
M879T133	0.201144	0.00059347	0.0021645	0.00374823	0.0078766	1.66887	exp:con	0.119988	HMDB0150024	10-(3-hydroxyphenyl)-3,22-bis(4-hydroxyphenyl)-9,14-diphenyl-8,23-dioxaheptacyclo[19.6.1.0²,¹³.0⁴,¹².0⁷,¹¹.0¹⁵,²⁰.0²⁴,²⁸]octacosa-1(28),4(12),5,7(11),15(20),16,18,24,26-nonaene-5,16,18,26-tetrol	n/a	C56H42O9	858.283	M+Na-2H	-	879.258	6	n/a
M879T133	0.201144	0.00059347	0.0021645	0.00374823	0.0078766	1.66887	exp:con	0.119988	HMDB0150023	10-(3-hydroxyphenyl)-3,14-bis(4-hydroxyphenyl)-9,22-diphenyl-8,23-dioxaheptacyclo[19.6.1.0²,¹³.0⁴,¹².0⁷,¹¹.0¹⁵,²⁰.0²⁴,²⁸]octacosa-1(28),4(12),5,7(11),15(20),16,18,24,26-nonaene-5,16,18,26-tetrol	n/a	C56H42O9	858.283	M+Na-2H	-	879.258	6	n/a
M879T133	0.201144	0.00059347	0.0021645	0.00374823	0.0078766	1.66887	exp:con	0.119988	HMDB0150021	10-(3-hydroxyphenyl)-14,22-bis(4-hydroxyphenyl)-3,9-diphenyl-8,23-dioxaheptacyclo[19.6.1.0²,¹³.0⁴,¹².0⁷,¹¹.0¹⁵,²⁰.0²⁴,²⁸]octacosa-1(28),4(12),5,7(11),15(20),16,18,24,26-nonaene-5,16,18,26-tetrol	n/a	C56H42O9	858.283	M+Na-2H	-	879.258	6	n/a
M879T133	0.201144	0.00059347	0.0021645	0.00374823	0.0078766	1.66887	exp:con	0.119988	HMDB0150025	10-(3,5-dihydroxyphenyl)-9-(4-hydroxyphenyl)-3,14,22-triphenyl-8,23-dioxaheptacyclo[19.6.1.0²,¹³.0⁴,¹².0⁷,¹¹.0¹⁵,²⁰.0²⁴,²⁸]octacosa-1(28),4(12),5,7(11),15(20),16,18,24,26-nonaene-5,16,18,26-tetrol	n/a	C56H42O9	858.283	M+Na-2H	-	879.258	6	n/a
M879T133	0.201144	0.00059347	0.0021645	0.00374823	0.0078766	1.66887	exp:con	0.119988	HMDB0150026	10-(3,5-dihydroxyphenyl)-14-(4-hydroxyphenyl)-3,9,22-triphenyl-8,23-dioxaheptacyclo[19.6.1.0²,¹³.0⁴,¹².0⁷,¹¹.0¹⁵,²⁰.0²⁴,²⁸]octacosa-1(28),4(12),5,7(11),15(20),16,18,24,26-nonaene-5,16,18,26-tetrol	n/a	C56H42O9	858.283	M+Na-2H	-	879.258	6	n/a
M879T133	0.201144	0.00059347	0.0021645	0.00374823	0.0078766	1.66887	exp:con	0.119988	HMDB0150028	10-(3,5-dihydroxyphenyl)-3-(4-hydroxyphenyl)-9,14,22-triphenyl-8,23-dioxaheptacyclo[19.6.1.0²,¹³.0⁴,¹².0⁷,¹¹.0¹⁵,²⁰.0²⁴,²⁸]octacosa-1(28),4(12),5,7(11),15(20),16,18,24,26-nonaene-5,16,18,26-tetrol	n/a	C56H42O9	858.283	M+Na-2H	-	879.258	6	n/a
M879T133	0.201144	0.00059347	0.0021645	0.00374823	0.0078766	1.66887	exp:con	0.119988	HMDB0136876	8,16-diphenyl-9-[4,6,12-trihydroxy-16-(4-hydroxyphenyl)-8-phenyl-15-oxatetracyclo[8.6.1.0²,⁷.0¹⁴,¹⁷]heptadeca-2(7),3,5,10(17),11,13-hexaen-9-yl]-15-oxatetracyclo[8.6.1.0²,⁷.0¹⁴,¹⁷]heptadeca-2(7),3,5,10(17),11,13-hexaene-4,6,12-triol	n/a	C56H42O9	858.283	M+Na-2H	-	879.258	6	n/a
M879T133	0.201144	0.00059347	0.0021645	0.00374823	0.0078766	1.66887	exp:con	0.119988	HMDB0136877	8,16-diphenyl-9-[4,6,12-trihydroxy-8-(4-hydroxyphenyl)-16-phenyl-15-oxatetracyclo[8.6.1.0²,⁷.0¹⁴,¹⁷]heptadeca-2(7),3,5,10(17),11,13-hexaen-9-yl]-15-oxatetracyclo[8.6.1.0²,⁷.0¹⁴,¹⁷]heptadeca-2(7),3,5,10(17),11,13-hexaene-4,6,12-triol	n/a	C56H42O9	858.283	M+Na-2H	-	879.258	6	n/a
M879T133	0.201144	0.00059347	0.0021645	0.00374823	0.0078766	1.66887	exp:con	0.119988	HMDB0134226	4-{5-[(E)-2-[6-hydroxy-3-(3-hydroxyphenyl)-2-phenyl-2,3-dihydro-1-benzofuran-4-yl]ethenyl]-2-(4-hydroxyphenyl)-2,3-dihydro-1-benzofuran-3-yl}-3-(3-hydroxyphenyl)-2-(4-hydroxyphenyl)-2,3-dihydro-1-benzofuran-6-ol	n/a	C56H42O9	858.283	M+Na-2H	-	879.258	6	n/a
M879T133	0.201144	0.00059347	0.0021645	0.00374823	0.0078766	1.66887	exp:con	0.119988	HMDB0134227	4-{5-[(E)-2-[6-hydroxy-3-(3-hydroxyphenyl)-2-(4-hydroxyphenyl)-2,3-dihydro-1-benzofuran-4-yl]ethenyl]-2-phenyl-2,3-dihydro-1-benzofuran-3-yl}-3-(3-hydroxyphenyl)-2-(4-hydroxyphenyl)-2,3-dihydro-1-benzofuran-6-ol	n/a	C56H42O9	858.283	M+Na-2H	-	879.258	6	n/a
M879T133	0.201144	0.00059347	0.0021645	0.00374823	0.0078766	1.66887	exp:con	0.119988	HMDB0134231	5-(6-hydroxy-4-{5-[(E)-2-[6-hydroxy-3-(3-hydroxyphenyl)-2-phenyl-2,3-dihydro-1-benzofuran-4-yl]ethenyl]-2-(4-hydroxyphenyl)-2,3-dihydro-1-benzofuran-3-yl}-2-phenyl-2,3-dihydro-1-benzofuran-3-yl)benzene-1,3-diol	n/a	C56H42O9	858.283	M+Na-2H	-	879.258	6	n/a
M879T133	0.201144	0.00059347	0.0021645	0.00374823	0.0078766	1.66887	exp:con	0.119988	HMDB0134228	5-{6-hydroxy-4-[(E)-2-{3-[6-hydroxy-3-(3-hydroxyphenyl)-2-phenyl-2,3-dihydro-1-benzofuran-4-yl]-2-(4-hydroxyphenyl)-2,3-dihydro-1-benzofuran-5-yl}ethenyl]-2-phenyl-2,3-dihydro-1-benzofuran-3-yl}benzene-1,3-diol	n/a	C56H42O9	858.283	M+Na-2H	-	879.258	6	n/a
M879T133	0.201144	0.00059347	0.0021645	0.00374823	0.0078766	1.66887	exp:con	0.119988	HMDB0134229	5-{6-hydroxy-4-[(E)-2-{3-[6-hydroxy-3-(3-hydroxyphenyl)-2-phenyl-2,3-dihydro-1-benzofuran-4-yl]-2-phenyl-2,3-dihydro-1-benzofuran-5-yl}ethenyl]-2-(4-hydroxyphenyl)-2,3-dihydro-1-benzofuran-3-yl}benzene-1,3-diol	n/a	C56H42O9	858.283	M+Na-2H	-	879.258	6	n/a
M879T133	0.201144	0.00059347	0.0021645	0.00374823	0.0078766	1.66887	exp:con	0.119988	HMDB0134230	5-{6-hydroxy-4-[(E)-2-{3-[6-hydroxy-3-(3-hydroxyphenyl)-2-(4-hydroxyphenyl)-2,3-dihydro-1-benzofuran-4-yl]-2-phenyl-2,3-dihydro-1-benzofuran-5-yl}ethenyl]-2-phenyl-2,3-dihydro-1-benzofuran-3-yl}benzene-1,3-diol	n/a	C56H42O9	858.283	M+Na-2H	-	879.258	6	n/a
M879T133	0.201144	0.00059347	0.0021645	0.00374823	0.0078766	1.66887	exp:con	0.119988	HMDB0134233	5-(6-hydroxy-4-{5-[(E)-2-[6-hydroxy-3-(3-hydroxyphenyl)-2-phenyl-2,3-dihydro-1-benzofuran-4-yl]ethenyl]-2-phenyl-2,3-dihydro-1-benzofuran-3-yl}-2-(4-hydroxyphenyl)-2,3-dihydro-1-benzofuran-3-yl)benzene-1,3-diol	n/a	C56H42O9	858.283	M+Na-2H	-	879.258	6	n/a
M879T133	0.201144	0.00059347	0.0021645	0.00374823	0.0078766	1.66887	exp:con	0.119988	HMDB0134232	5-(6-hydroxy-4-{5-[(E)-2-[6-hydroxy-3-(3-hydroxyphenyl)-2-(4-hydroxyphenyl)-2,3-dihydro-1-benzofuran-4-yl]ethenyl]-2-phenyl-2,3-dihydro-1-benzofuran-3-yl}-2-phenyl-2,3-dihydro-1-benzofuran-3-yl)benzene-1,3-diol	n/a	C56H42O9	858.283	M+Na-2H	-	879.258	6	n/a
M879T133	0.201144	0.00059347	0.0021645	0.00374823	0.0078766	1.66887	exp:con	0.119988	HMDB0134234	5-{4-[(E)-2-{3-[3-(3,5-dihydroxyphenyl)-6-hydroxy-2-phenyl-2,3-dihydro-1-benzofuran-4-yl]-2-phenyl-2,3-dihydro-1-benzofuran-5-yl}ethenyl]-6-hydroxy-2-phenyl-2,3-dihydro-1-benzofuran-3-yl}benzene-1,3-diol	n/a	C56H42O9	858.283	M+Na-2H	-	879.258	6	n/a
M879T133	0.201144	0.00059347	0.0021645	0.00374823	0.0078766	1.66887	exp:con	0.119988	HMDB0150027	10-(3,5-dihydroxyphenyl)-22-(4-hydroxyphenyl)-3,9,14-triphenyl-8,23-dioxaheptacyclo[19.6.1.0²,¹³.0⁴,¹².0⁷,¹¹.0¹⁵,²⁰.0²⁴,²⁸]octacosa-1(28),4(12),5,7(11),15(20),16,18,24,26-nonaene-5,16,18,26-tetrol	n/a	C56H42O9	858.283	M+Na-2H	-	879.258	6	n/a
M153T172	0.285188	0.000683881	0.0021645	0.00409597	0.0078766	1.43472	exp:con	0.150709	HMDB0001090	(R)-5-Diphosphomevalonic acid	C01143	C6H14O10P2	308.006	M-2H	-	152.996	3	map00900 Terpenoid backbone biosynthesis;map01062 Biosynthesis of terpenoids and steroids;map01100 Metabolic pathways;map01110 Biosynthesis of secondary metabolites;map01130 Biosynthesis of antibiotics;
M153T172	0.285188	0.000683881	0.0021645	0.00409597	0.0078766	1.43472	exp:con	0.150709	HMDB0001981	(R)-Mevalonic acid-5-pyrophosphate	n/a	C6H14O10P2	308.006	M-2H	-	152.996	3	n/a
M219T60	3.0538	0.00223199	0.0021645	0.00939	0.0078766	1.72978	exp:con	0.223933	HMDB0140191	{4-[7-hydroxy-5-(2-hydroxy-1-methoxypropyl)-3-methyl-2,3-dihydro-1-benzofuran-2-yl]-2-methoxyphenyl}oxidanesulfonic acid	n/a	C20H24O9S	440.114	M-2H	-	219.05	4	n/a
M219T60	3.0538	0.00223199	0.0021645	0.00939	0.0078766	1.72978	exp:con	0.223933	HMDB0140182	{2-hydroxy-5-[5-(2-hydroxy-1-methoxypropyl)-7-methoxy-3-methyl-2,3-dihydro-1-benzofuran-2-yl]phenyl}oxidanesulfonic acid	n/a	C20H24O9S	440.114	M-2H	-	219.05	4	n/a
M219T60	3.0538	0.00223199	0.0021645	0.00939	0.0078766	1.72978	exp:con	0.223933	HMDB0140183	({1-[2-(3,4-dihydroxyphenyl)-7-methoxy-3-methyl-2,3-dihydro-1-benzofuran-5-yl]-1-methoxypropan-2-yl}oxy)sulfonic acid	n/a	C20H24O9S	440.114	M-2H	-	219.05	4	n/a
M219T60	3.0538	0.00223199	0.0021645	0.00939	0.0078766	1.72978	exp:con	0.223933	HMDB0136731	{[5-(3-{[(7-methoxy-2-oxo-2H-chromen-5-yl)oxy]methyl}-2-methyloxiran-2-yl)-2-methylpent-1-en-3-yl]oxy}sulfonic acid	n/a	C20H24O9S	440.114	M-2H	-	219.05	4	n/a
M219T60	3.0538	0.00223199	0.0021645	0.00939	0.0078766	1.72978	exp:con	0.223933	HMDB0136728	({6-[(7-methoxy-2-oxo-2H-chromen-5-yl)oxy]-4-methyl-1-(2-methyloxiran-2-yl)hex-4-en-1-yl}oxy)sulfonic acid	n/a	C20H24O9S	440.114	M-2H	-	219.05	4	n/a
M219T60	3.0538	0.00223199	0.0021645	0.00939	0.0078766	1.72978	exp:con	0.223933	HMDB0136725	({5-hydroxy-8-[(7-methoxy-2-oxo-2H-chromen-5-yl)oxy]-2,6-dimethylocta-1,6-dien-3-yl}oxy)sulfonic acid	n/a	C20H24O9S	440.114	M-2H	-	219.05	4	n/a
M219T60	3.0538	0.00223199	0.0021645	0.00939	0.0078766	1.72978	exp:con	0.223933	HMDB0136724	({6-hydroxy-1-[(7-methoxy-2-oxo-2H-chromen-5-yl)oxy]-3,7-dimethylocta-2,7-dien-4-yl}oxy)sulfonic acid	n/a	C20H24O9S	440.114	M-2H	-	219.05	4	n/a
M219T60	3.0538	0.00223199	0.0021645	0.00939	0.0078766	1.72978	exp:con	0.223933	HMDB0140192	({1-[7-hydroxy-2-(4-hydroxy-3-methoxyphenyl)-3-methyl-2,3-dihydro-1-benzofuran-5-yl]-1-methoxypropan-2-yl}oxy)sulfonic acid	n/a	C20H24O9S	440.114	M-2H	-	219.05	4	n/a
M219T60	3.0538	0.00223199	0.0021645	0.00939	0.0078766	1.72978	exp:con	0.223933	HMDB0162929	{4-[5-(3,4-dihydroxy-5-methoxyphenyl)-3,4-dimethyloxolan-2-yl]-2-methoxyphenyl}oxidanesulfonic acid	n/a	C20H24O9S	440.114	M-2H	-	219.05	4	n/a
M219T60	3.0538	0.00223199	0.0021645	0.00939	0.0078766	1.72978	exp:con	0.223933	HMDB0162928	{2-hydroxy-4-[5-(4-hydroxy-3-methoxyphenyl)-3,4-dimethyloxolan-2-yl]-6-methoxyphenyl}oxidanesulfonic acid	n/a	C20H24O9S	440.114	M-2H	-	219.05	4	n/a
M219T60	3.0538	0.00223199	0.0021645	0.00939	0.0078766	1.72978	exp:con	0.223933	HMDB0162933	{2-hydroxy-5-[5-(4-hydroxy-3,5-dimethoxyphenyl)-3,4-dimethyloxolan-2-yl]phenyl}oxidanesulfonic acid	n/a	C20H24O9S	440.114	M-2H	-	219.05	4	n/a
M219T60	3.0538	0.00223199	0.0021645	0.00939	0.0078766	1.72978	exp:con	0.223933	HMDB0171448	{[2,5-bis(4-hydroxy-3-methoxyphenyl)-4-methyloxolan-3-yl]methoxy}sulfonic acid	n/a	C20H24O9S	440.114	M-2H	-	219.05	4	n/a
M219T60	3.0538	0.00223199	0.0021645	0.00939	0.0078766	1.72978	exp:con	0.223933	HMDB0171447	{4-[5-(4-hydroxy-3-methoxyphenyl)-3-(hydroxymethyl)-4-methyloxolan-2-yl]-2-methoxyphenyl}oxidanesulfonic acid	n/a	C20H24O9S	440.114	M-2H	-	219.05	4	n/a
M219T60	3.0538	0.00223199	0.0021645	0.00939	0.0078766	1.72978	exp:con	0.223933	HMDB0171446	{4-[5-(4-hydroxy-3-methoxyphenyl)-4-(hydroxymethyl)-3-methyloxolan-2-yl]-2-methoxyphenyl}oxidanesulfonic acid	n/a	C20H24O9S	440.114	M-2H	-	219.05	4	n/a
M219T60	3.0538	0.00223199	0.0021645	0.00939	0.0078766	1.72978	exp:con	0.223933	HMDB0171452	{4-[3-hydroxy-5-(4-hydroxy-3-methoxyphenyl)-3,4-dimethyloxolan-2-yl]-2-methoxyphenyl}oxidanesulfonic acid	n/a	C20H24O9S	440.114	M-2H	-	219.05	4	n/a
M219T60	3.0538	0.00223199	0.0021645	0.00939	0.0078766	1.72978	exp:con	0.223933	HMDB0171451	{4-[4-hydroxy-5-(4-hydroxy-3-methoxyphenyl)-3,4-dimethyloxolan-2-yl]-2-methoxyphenyl}oxidanesulfonic acid	n/a	C20H24O9S	440.114	M-2H	-	219.05	4	n/a
M219T60	3.0538	0.00223199	0.0021645	0.00939	0.0078766	1.72978	exp:con	0.223933	HMDB0136721	{[(6Z)-7-hydroxy-6-{2-[(7-methoxy-2-oxo-2H-chromen-5-yl)oxy]ethylidene}-2-methylhept-1-en-3-yl]oxy}sulfonic acid	n/a	C20H24O9S	440.114	M-2H	-	219.05	4	n/a
M219T60	3.0538	0.00223199	0.0021645	0.00939	0.0078766	1.72978	exp:con	0.223933	HMDB0136720	{[(2Z)-5-hydroxy-2-{2-[(7-methoxy-2-oxo-2H-chromen-5-yl)oxy]ethylidene}-6-methylhept-6-en-1-yl]oxy}sulfonic acid	n/a	C20H24O9S	440.114	M-2H	-	219.05	4	n/a
M219T60	3.0538	0.00223199	0.0021645	0.00939	0.0078766	1.72978	exp:con	0.223933	HMDB0136706	({3-hydroxy-8-[(7-methoxy-2-oxo-2H-chromen-5-yl)oxy]-2,6-dimethylocta-1,6-dien-4-yl}oxy)sulfonic acid	n/a	C20H24O9S	440.114	M-2H	-	219.05	4	n/a
M219T60	3.0538	0.00223199	0.0021645	0.00939	0.0078766	1.72978	exp:con	0.223933	HMDB0136709	({8-[(6-hydroxy-7-methoxy-2-oxo-2H-chromen-5-yl)oxy]-2,6-dimethylocta-1,6-dien-3-yl}oxy)sulfonic acid	n/a	C20H24O9S	440.114	M-2H	-	219.05	4	n/a
M219T60	3.0538	0.00223199	0.0021645	0.00939	0.0078766	1.72978	exp:con	0.223933	HMDB0136707	({4-hydroxy-8-[(7-methoxy-2-oxo-2H-chromen-5-yl)oxy]-2,6-dimethylocta-1,6-dien-3-yl}oxy)sulfonic acid	n/a	C20H24O9S	440.114	M-2H	-	219.05	4	n/a
M219T60	3.0538	0.00223199	0.0021645	0.00939	0.0078766	1.72978	exp:con	0.223933	HMDB0136717	({1-hydroxy-8-[(7-methoxy-2-oxo-2H-chromen-5-yl)oxy]-6-methyl-2-methylideneoct-6-en-3-yl}oxy)sulfonic acid	n/a	C20H24O9S	440.114	M-2H	-	219.05	4	n/a
M219T60	3.0538	0.00223199	0.0021645	0.00939	0.0078766	1.72978	exp:con	0.223933	HMDB0136716	({3-hydroxy-8-[(7-methoxy-2-oxo-2H-chromen-5-yl)oxy]-6-methyl-2-methylideneoct-6-en-1-yl}oxy)sulfonic acid	n/a	C20H24O9S	440.114	M-2H	-	219.05	4	n/a
M219T60	3.0538	0.00223199	0.0021645	0.00939	0.0078766	1.72978	exp:con	0.223933	HMDB0178248	6-{[4,5-dihydroxy-2-(hydroxymethyl)-6-[(5-oxooxolan-3-yl)oxy]oxan-3-yl]oxy}-3,4,5-trihydroxyoxane-2-carboxylic acid	n/a	C16H24O14	440.117	M-2H	-	219.051	9	n/a
M219T60	3.0538	0.00223199	0.0021645	0.00939	0.0078766	1.72978	exp:con	0.223933	HMDB0178249	6-{[3,5-dihydroxy-2-(hydroxymethyl)-6-[(5-oxooxolan-3-yl)oxy]oxan-4-yl]oxy}-3,4,5-trihydroxyoxane-2-carboxylic acid	n/a	C16H24O14	440.117	M-2H	-	219.051	9	n/a
M219T60	3.0538	0.00223199	0.0021645	0.00939	0.0078766	1.72978	exp:con	0.223933	HMDB0178250	6-{[4,5-dihydroxy-6-(hydroxymethyl)-2-[(5-oxooxolan-3-yl)oxy]oxan-3-yl]oxy}-3,4,5-trihydroxyoxane-2-carboxylic acid	n/a	C16H24O14	440.117	M-2H	-	219.051	9	n/a
M219T60	3.0538	0.00223199	0.0021645	0.00939	0.0078766	1.72978	exp:con	0.223933	HMDB0178251	3,4,5-trihydroxy-6-({3,4,5-trihydroxy-6-[(5-oxooxolan-3-yl)oxy]oxan-2-yl}methoxy)oxane-2-carboxylic acid	n/a	C16H24O14	440.117	M-2H	-	219.051	9	n/a
M267T129	2.1036	6.88e-07	0.0021645	7.79e-05	0.0078766	1.27617	exp:con	1.61e-12	HMDB0006944	1,4-beta-D-Glucan	n/a	C18H32O18	536.159	M-2H	-	267.072	3	n/a
M339T60_1	2.77471	6.6e-07	0.0021645	7.65e-05	0.0078766	1.61931	exp:con	0.0979021	HMDB0011720	UDP-N-acetylmuraminate	C01050	C20H31N3O19P2	679.103	M-2H	-	338.544	4	map00471 D-Glutamine and D-glutamate metabolism;map00520 Amino sugar and nucleotide sugar metabolism;map00550 Peptidoglycan biosynthesis;map01100 Metabolic pathways;
M339T97_1	2.41307	2.11e-06	0.0021645	0.000139696	0.0078766	1.30065	exp:con	0.0606681	HMDB0011720	UDP-N-acetylmuraminate	C01050	C20H31N3O19P2	679.103	M-2H	-	338.544	4	map00471 D-Glutamine and D-glutamate metabolism;map00520 Amino sugar and nucleotide sugar metabolism;map00550 Peptidoglycan biosynthesis;map01100 Metabolic pathways;
M355T138	0.329403	1.33e-05	0.0021645	0.000345822	0.0078766	1.6244	exp:con	0.155729	HMDB0034195	Convalloside	n/a	C35H52O15	712.331	M-2H	-	355.158	9	n/a
M427T134	2.17629	0.00651376	0.00865801	0.0203972	0.0233787	1.05377	exp:con	0.0197824	HMDB0041211	Sesaminol glucosyl-(1->2)-[glucosyl-(1->6)]-glucoside	n/a	C38H48O22	856.264	M-2H	-	427.125	5	n/a
M427T134	2.17629	0.00651376	0.00865801	0.0203972	0.0233787	1.05377	exp:con	0.0197824	HMDB0125651	5-(6-hydroxy-4-{5-[(E)-2-[6-hydroxy-3-(3-hydroxyphenyl)-2-phenyl-2,3-dihydro-1-benzofuran-4-yl]ethenyl]-2-phenyl-1-benzofuran-3-yl}-2-(4-hydroxyphenyl)-2,3-dihydro-1-benzofuran-3-yl)benzene-1,3-diol	n/a	C56H40O9	856.267	M-2H	-	427.126	10	n/a
M427T134	2.17629	0.00651376	0.00865801	0.0203972	0.0233787	1.05377	exp:con	0.0197824	HMDB0125652	5-(6-hydroxy-4-{5-[(E)-2-[6-hydroxy-3-(3-hydroxyphenyl)-2-phenyl-2,3-dihydro-1-benzofuran-4-yl]ethenyl]-2-(4-hydroxyphenyl)-1-benzofuran-3-yl}-2-phenyl-2,3-dihydro-1-benzofuran-3-yl)benzene-1,3-diol	n/a	C56H40O9	856.267	M-2H	-	427.126	10	n/a
M427T134	2.17629	0.00651376	0.00865801	0.0203972	0.0233787	1.05377	exp:con	0.0197824	HMDB0125649	5-{6-hydroxy-4-[(E)-2-{3-[6-hydroxy-3-(3-hydroxyphenyl)-2-phenyl-2,3-dihydro-1-benzofuran-4-yl]-2-(4-hydroxyphenyl)-1-benzofuran-5-yl}ethenyl]-2-phenyl-2,3-dihydro-1-benzofuran-3-yl}benzene-1,3-diol	n/a	C56H40O9	856.267	M-2H	-	427.126	10	n/a
M427T134	2.17629	0.00651376	0.00865801	0.0203972	0.0233787	1.05377	exp:con	0.0197824	HMDB0125650	5-(6-hydroxy-4-{5-[(E)-2-[6-hydroxy-3-(3-hydroxyphenyl)-2-(4-hydroxyphenyl)-2,3-dihydro-1-benzofuran-4-yl]ethenyl]-2-phenyl-1-benzofuran-3-yl}-2-phenyl-2,3-dihydro-1-benzofuran-3-yl)benzene-1,3-diol	n/a	C56H40O9	856.267	M-2H	-	427.126	10	n/a
M427T134	2.17629	0.00651376	0.00865801	0.0203972	0.0233787	1.05377	exp:con	0.0197824	HMDB0125645	4-{5-[(E)-2-[6-hydroxy-3-(3-hydroxyphenyl)-2-(4-hydroxyphenyl)-2,3-dihydro-1-benzofuran-4-yl]ethenyl]-2-(4-hydroxyphenyl)-1-benzofuran-3-yl}-3-(3-hydroxyphenyl)-2-phenyl-2,3-dihydro-1-benzofuran-6-ol	n/a	C56H40O9	856.267	M-2H	-	427.126	10	n/a
M427T134	2.17629	0.00651376	0.00865801	0.0203972	0.0233787	1.05377	exp:con	0.0197824	HMDB0125648	5-{6-hydroxy-4-[(E)-2-{3-[6-hydroxy-3-(3-hydroxyphenyl)-2-(4-hydroxyphenyl)-2,3-dihydro-1-benzofuran-4-yl]-2-phenyl-1-benzofuran-5-yl}ethenyl]-2-phenyl-2,3-dihydro-1-benzofuran-3-yl}benzene-1,3-diol	n/a	C56H40O9	856.267	M-2H	-	427.126	10	n/a
M427T134	2.17629	0.00651376	0.00865801	0.0203972	0.0233787	1.05377	exp:con	0.0197824	HMDB0125647	5-{6-hydroxy-4-[(E)-2-{3-[6-hydroxy-3-(3-hydroxyphenyl)-2-phenyl-2,3-dihydro-1-benzofuran-4-yl]-2-phenyl-1-benzofuran-5-yl}ethenyl]-2-(4-hydroxyphenyl)-2,3-dihydro-1-benzofuran-3-yl}benzene-1,3-diol	n/a	C56H40O9	856.267	M-2H	-	427.126	10	n/a
M427T134	2.17629	0.00651376	0.00865801	0.0203972	0.0233787	1.05377	exp:con	0.0197824	HMDB0125646	4-{5-[(E)-2-[6-hydroxy-3-(3-hydroxyphenyl)-2-phenyl-2,3-dihydro-1-benzofuran-4-yl]ethenyl]-2-(4-hydroxyphenyl)-1-benzofuran-3-yl}-3-(3-hydroxyphenyl)-2-(4-hydroxyphenyl)-2,3-dihydro-1-benzofuran-6-ol	n/a	C56H40O9	856.267	M-2H	-	427.126	10	n/a
M427T134	2.17629	0.00651376	0.00865801	0.0203972	0.0233787	1.05377	exp:con	0.0197824	HMDB0125644	4-{5-[(E)-2-[6-hydroxy-3-(3-hydroxyphenyl)-2-(4-hydroxyphenyl)-2,3-dihydro-1-benzofuran-4-yl]ethenyl]-2-phenyl-1-benzofuran-3-yl}-3-(3-hydroxyphenyl)-2-(4-hydroxyphenyl)-2,3-dihydro-1-benzofuran-6-ol	n/a	C56H40O9	856.267	M-2H	-	427.126	10	n/a
M427T134	2.17629	0.00651376	0.00865801	0.0203972	0.0233787	1.05377	exp:con	0.0197824	HMDB0125653	5-{4-[(E)-2-{3-[3-(3,5-dihydroxyphenyl)-6-hydroxy-2-phenyl-2,3-dihydro-1-benzofuran-4-yl]-2-phenyl-1-benzofuran-5-yl}ethenyl]-6-hydroxy-2-phenyl-2,3-dihydro-1-benzofuran-3-yl}benzene-1,3-diol	n/a	C56H40O9	856.267	M-2H	-	427.126	10	n/a
M71T70	5.21971	2.59e-05	0.0021645	0.000516274	0.0078766	1.85683	exp:con	0.250268	HMDB0001882	Dihydroxyacetone	C00184	C3H6O3	90.0317	M-H20-H	-	71.0133	3	map00561 Glycerolipid metabolism;map00680 Methane metabolism;map01100 Metabolic pathways;map01120 Microbial metabolism in diverse environments;map01200 Carbon metabolism;
M71T70	5.21971	2.59e-05	0.0021645	0.000516274	0.0078766	1.85683	exp:con	0.250268	HMDB0041929	Methoxyacetic acid	n/a	C3H6O3	90.0317	M-H20-H	-	71.0133	3	n/a
M71T70	5.21971	2.59e-05	0.0021645	0.000516274	0.0078766	1.85683	exp:con	0.250268	HMDB0031232	Monoethyl carbonate	n/a	C3H6O3	90.0317	M-H20-H	-	71.0133	3	n/a
M71T70	5.21971	2.59e-05	0.0021645	0.000516274	0.0078766	1.85683	exp:con	0.250268	HMDB0029580	Dimethyl carbonate	n/a	C3H6O3	90.0317	M-H20-H	-	71.0133	3	n/a
M71T70	5.21971	2.59e-05	0.0021645	0.000516274	0.0078766	1.85683	exp:con	0.250268	HMDB0144295	2-hydroxypropanoic acid	C01432	C3H6O3	90.0317	M-H20-H	-	71.0133	3	n/a
M71T70	5.21971	2.59e-05	0.0021645	0.000516274	0.0078766	1.85683	exp:con	0.250268	HMDB0001051	Glyceraldehyde	C02154	C3H6O3	90.0317	M-H20-H	-	71.0133	3	n/a
M71T70	5.21971	2.59e-05	0.0021645	0.000516274	0.0078766	1.85683	exp:con	0.250268	HMDB0000190	L-Lactic acid	C00186	C3H6O3	90.0317	M-H20-H	-	71.0133	3	map00010 Glycolysis / Gluconeogenesis;map00051 Fructose and mannose metabolism;map00620 Pyruvate metabolism;map00640 Propanoate metabolism;map00643 Styrene degradation;map01100 Metabolic pathways;map01110 Biosynthesis of secondary metabolites;map01120 Microbial metabolism in diverse environments;map01130 Biosynthesis of antibiotics;map04024 cAMP signaling pathway;map04066 HIF-1 signaling pathway;…
M71T70	5.21971	2.59e-05	0.0021645	0.000516274	0.0078766	1.85683	exp:con	0.250268	HMDB0000700	Hydroxypropionic acid	C01013	C3H6O3	90.0317	M-H20-H	-	71.0133	3	map00240 Pyrimidine metabolism;map00410 beta-Alanine metabolism;map00640 Propanoate metabolism;map00720 Carbon fixation pathways in prokaryotes;map01100 Metabolic pathways;map01120 Microbial metabolism in diverse environments;map01200 Carbon metabolism;
M71T70	5.21971	2.59e-05	0.0021645	0.000516274	0.0078766	1.85683	exp:con	0.250268	HMDB0001311	D-Lactic acid	C00256	C3H6O3	90.0317	M-H20-H	-	71.0133	3	map00620 Pyruvate metabolism;map01120 Microbial metabolism in diverse environments;map01502 Vancomycin resistance;
M71T70	5.21971	2.59e-05	0.0021645	0.000516274	0.0078766	1.85683	exp:con	0.250268	HMDB0062492	L-lactate	n/a	C3H5O3	89.0239	M-H20-H	-	71.0128	5	n/a
M129T97	3.06768	5.66e-05	0.0021645	0.000810208	0.0078766	1.64117	exp:con	4.51e-11	HMDB0000428	3-Hydroxyglutaric acid	n/a	C5H8O5	148.037	M-H20-H	-	129.019	5	n/a
M129T97	3.06768	5.66e-05	0.0021645	0.000810208	0.0078766	1.64117	exp:con	4.51e-11	HMDB0160407	3-ethoxy-2-hydroxy-3-oxopropanoic acid	n/a	C5H8O5	148.037	M-H20-H	-	129.019	5	n/a
M129T97	3.06768	5.66e-05	0.0021645	0.000810208	0.0078766	1.64117	exp:con	4.51e-11	HMDB0160406	SCHEMBL4192400	n/a	C5H8O5	148.037	M-H20-H	-	129.019	5	n/a
M129T97	3.06768	5.66e-05	0.0021645	0.000810208	0.0078766	1.64117	exp:con	4.51e-11	HMDB0160667	SCHEMBL6374585	n/a	C5H8O5	148.037	M-H20-H	-	129.019	5	n/a
M129T97	3.06768	5.66e-05	0.0021645	0.000810208	0.0078766	1.64117	exp:con	4.51e-11	HMDB0160666	SCHEMBL1124153	n/a	C5H8O5	148.037	M-H20-H	-	129.019	5	n/a
M129T97	3.06768	5.66e-05	0.0021645	0.000810208	0.0078766	1.64117	exp:con	4.51e-11	HMDB0160668	Aethyltartronsaure	n/a	C5H8O5	148.037	M-H20-H	-	129.019	5	n/a
M129T97	3.06768	5.66e-05	0.0021645	0.000810208	0.0078766	1.64117	exp:con	4.51e-11	HMDB0000426	Citramalic acid	C00815	C5H8O5	148.037	M-H20-H	-	129.019	5	n/a
M129T97	3.06768	5.66e-05	0.0021645	0.000810208	0.0078766	1.64117	exp:con	4.51e-11	HMDB0000606	D-2-Hydroxyglutaric acid	C01087	C5H8O5	148.037	M-H20-H	-	129.019	5	n/a
M129T97	3.06768	5.66e-05	0.0021645	0.000810208	0.0078766	1.64117	exp:con	4.51e-11	HMDB0001900	Ribonolactone	C02674	C5H8O5	148.037	M-H20-H	-	129.019	5	n/a
M129T97	3.06768	5.66e-05	0.0021645	0.000810208	0.0078766	1.64117	exp:con	4.51e-11	HMDB0011676	D-Xylono-1,5-lactone	C02266	C5H8O5	148.037	M-H20-H	-	129.019	5	map00040 Pentose and glucuronate interconversions;
M129T97	3.06768	5.66e-05	0.0021645	0.000810208	0.0078766	1.64117	exp:con	4.51e-11	HMDB0059655	2-Hydroxyglutarate	C02630	C5H8O5	148.037	M-H20-H	-	129.019	5	map00650 Butanoate metabolism;map00660 C5-Branched dibasic acid metabolism;
M129T97	3.06768	5.66e-05	0.0021645	0.000810208	0.0078766	1.64117	exp:con	4.51e-11	HMDB0061190	3-methylmalate(2-)	n/a	C5H8O5	148.037	M-H20-H	-	129.019	5	n/a
M129T97	3.06768	5.66e-05	0.0021645	0.000810208	0.0078766	1.64117	exp:con	4.51e-11	HMDB0062739	3-methylmalate(2-)	n/a	C5H8O5	148.037	M-H20-H	-	129.019	5	n/a
M129T97	3.06768	5.66e-05	0.0021645	0.000810208	0.0078766	1.64117	exp:con	4.51e-11	HMDB0000694	L-2-Hydroxyglutaric acid	C03196	C5H8O5	148.037	M-H20-H	-	129.019	5	n/a
M129T97	3.06768	5.66e-05	0.0021645	0.000810208	0.0078766	1.64117	exp:con	4.51e-11	HMDB0161319	Itamalic acid	n/a	C5H8O5	148.037	M-H20-H	-	129.019	5	n/a
M147T155	0.383047	1.09e-05	0.0021645	0.000318253	0.0078766	1.63922	exp:con	0.0737765	HMDB0168681	4-ethoxybenzoic acid	n/a	C9H10O3	166.063	M-H20-H	-	147.045	1	n/a
M147T155	0.383047	1.09e-05	0.0021645	0.000318253	0.0078766	1.63922	exp:con	0.0737765	HMDB0041611	Ethyl 2-furanacrylate	n/a	C9H10O3	166.063	M-H20-H	-	147.045	1	n/a
M147T155	0.383047	1.09e-05	0.0021645	0.000318253	0.0078766	1.63922	exp:con	0.0737765	HMDB0062348	3,5-Dimethoxybenzaldehyde	n/a	C9H10O3	166.063	M-H20-H	-	147.045	1	n/a
M147T155	0.383047	1.09e-05	0.0021645	0.000318253	0.0078766	1.63922	exp:con	0.0737765	HMDB0125519	4-ethenyl-6-methoxybenzene-1,3-diol	n/a	C9H10O3	166.063	M-H20-H	-	147.045	1	n/a
M147T155	0.383047	1.09e-05	0.0021645	0.000318253	0.0078766	1.63922	exp:con	0.0737765	HMDB0166615	4-[(1Z)-3-hydroxyprop-1-en-1-yl]benzene-1,2-diol	n/a	C9H10O3	166.063	M-H20-H	-	147.045	1	n/a
M147T155	0.383047	1.09e-05	0.0021645	0.000318253	0.0078766	1.63922	exp:con	0.0737765	HMDB0167324	AKOS023569996	n/a	C9H10O3	166.063	M-H20-H	-	147.045	1	n/a
M147T155	0.383047	1.09e-05	0.0021645	0.000318253	0.0078766	1.63922	exp:con	0.0737765	HMDB0168656	2-hydroxyethyl benzoate	n/a	C9H10O3	166.063	M-H20-H	-	147.045	1	n/a
M147T155	0.383047	1.09e-05	0.0021645	0.000318253	0.0078766	1.63922	exp:con	0.0737765	HMDB0168684	4-Ethoxy-3-hydroxybenzaldehyde	n/a	C9H10O3	166.063	M-H20-H	-	147.045	1	n/a
M147T155	0.383047	1.09e-05	0.0021645	0.000318253	0.0078766	1.63922	exp:con	0.0737765	HMDB0168682	4-ethoxy-2-hydroxybenzaldehyde	n/a	C9H10O3	166.063	M-H20-H	-	147.045	1	n/a
M147T155	0.383047	1.09e-05	0.0021645	0.000318253	0.0078766	1.63922	exp:con	0.0737765	HMDB0168683	4-(2-hydroxyethoxy)benzaldehyde	n/a	C9H10O3	166.063	M-H20-H	-	147.045	1	n/a
M147T155	0.383047	1.09e-05	0.0021645	0.000318253	0.0078766	1.63922	exp:con	0.0737765	HMDB0171689	(4-Methylphenoxy)acetic acid	n/a	C9H10O3	166.063	M-H20-H	-	147.045	1	n/a
M147T155	0.383047	1.09e-05	0.0021645	0.000318253	0.0078766	1.63922	exp:con	0.0737765	HMDB0177510	1-(4-hydroxyphenyl)prop-1-ene-1,2-diol	n/a	C9H10O3	166.063	M-H20-H	-	147.045	1	n/a
M147T155	0.383047	1.09e-05	0.0021645	0.000318253	0.0078766	1.63922	exp:con	0.0737765	HMDB0180874	SCHEMBL7737611	n/a	C9H10O3	166.063	M-H20-H	-	147.045	1	n/a
M147T155	0.383047	1.09e-05	0.0021645	0.000318253	0.0078766	1.63922	exp:con	0.0737765	HMDB0180875	62600-15-1	n/a	C9H10O3	166.063	M-H20-H	-	147.045	1	n/a
M147T155	0.383047	1.09e-05	0.0021645	0.000318253	0.0078766	1.63922	exp:con	0.0737765	HMDB0180872	5-Allylbenzene-1,2,3-triol	n/a	C9H10O3	166.063	M-H20-H	-	147.045	1	n/a
M147T155	0.383047	1.09e-05	0.0021645	0.000318253	0.0078766	1.63922	exp:con	0.0737765	HMDB0180873	SCHEMBL978929	n/a	C9H10O3	166.063	M-H20-H	-	147.045	1	n/a
M147T155	0.383047	1.09e-05	0.0021645	0.000318253	0.0078766	1.63922	exp:con	0.0737765	HMDB0166610	3-(3,4-dihydroxyphenyl)propanal	n/a	C9H10O3	166.063	M-H20-H	-	147.045	1	n/a
M147T155	0.383047	1.09e-05	0.0021645	0.000318253	0.0078766	1.63922	exp:con	0.0737765	HMDB0166065	4-hydroxybenzyl acetate	n/a	C9H10O3	166.063	M-H20-H	-	147.045	1	n/a
M147T155	0.383047	1.09e-05	0.0021645	0.000318253	0.0078766	1.63922	exp:con	0.0737765	HMDB0142136	2-(2-hydroxyphenyl)propanoic acid	n/a	C9H10O3	166.063	M-H20-H	-	147.045	1	n/a
M147T155	0.383047	1.09e-05	0.0021645	0.000318253	0.0078766	1.63922	exp:con	0.0737765	HMDB0125525	5-ethenyl-3-methoxybenzene-1,2-diol	n/a	C9H10O3	166.063	M-H20-H	-	147.045	1	n/a
M147T155	0.383047	1.09e-05	0.0021645	0.000318253	0.0078766	1.63922	exp:con	0.0737765	HMDB0125539	4-ethenyl-2-methoxybenzene-1,3-diol	n/a	C9H10O3	166.063	M-H20-H	-	147.045	1	n/a
M147T155	0.383047	1.09e-05	0.0021645	0.000318253	0.0078766	1.63922	exp:con	0.0737765	HMDB0134035	3-hydroxy-3-(2-hydroxyphenyl)propanal	n/a	C9H10O3	166.063	M-H20-H	-	147.045	1	n/a
M147T155	0.383047	1.09e-05	0.0021645	0.000318253	0.0078766	1.63922	exp:con	0.0737765	HMDB0134033	3-(2,5-dihydroxyphenyl)propanal	n/a	C9H10O3	166.063	M-H20-H	-	147.045	1	n/a
M147T155	0.383047	1.09e-05	0.0021645	0.000318253	0.0078766	1.63922	exp:con	0.0737765	HMDB0134034	2-hydroxy-3-(2-hydroxyphenyl)propanal	n/a	C9H10O3	166.063	M-H20-H	-	147.045	1	n/a
M147T155	0.383047	1.09e-05	0.0021645	0.000318253	0.0078766	1.63922	exp:con	0.0737765	HMDB0134032	3-(2,3-dihydroxyphenyl)propanal	n/a	C9H10O3	166.063	M-H20-H	-	147.045	1	n/a
M147T155	0.383047	1.09e-05	0.0021645	0.000318253	0.0078766	1.63922	exp:con	0.0737765	HMDB0134037	2-[3-(hydroxymethyl)oxiran-2-yl]phenol	n/a	C9H10O3	166.063	M-H20-H	-	147.045	1	n/a
M147T155	0.383047	1.09e-05	0.0021645	0.000318253	0.0078766	1.63922	exp:con	0.0737765	HMDB0134038	2-(3-hydroxyprop-1-en-1-yl)benzene-1,4-diol	n/a	C9H10O3	166.063	M-H20-H	-	147.045	1	n/a
M147T155	0.383047	1.09e-05	0.0021645	0.000318253	0.0078766	1.63922	exp:con	0.0737765	HMDB0134036	3-(3-hydroxyprop-1-en-1-yl)benzene-1,2-diol	n/a	C9H10O3	166.063	M-H20-H	-	147.045	1	n/a
M147T155	0.383047	1.09e-05	0.0021645	0.000318253	0.0078766	1.63922	exp:con	0.0737765	HMDB0137472	4-[(E)-2-hydroxyethenyl]-2-methoxyphenol	n/a	C9H10O3	166.063	M-H20-H	-	147.045	1	n/a
M147T155	0.383047	1.09e-05	0.0021645	0.000318253	0.0078766	1.63922	exp:con	0.0737765	HMDB0141765	4-[(1E)-3-hydroxyprop-1-en-1-yl]benzene-1,2-diol	C12206	C9H10O3	166.063	M-H20-H	-	147.045	1	map00940 Phenylpropanoid biosynthesis;map01110 Biosynthesis of secondary metabolites;
M147T155	0.383047	1.09e-05	0.0021645	0.000318253	0.0078766	1.63922	exp:con	0.0737765	HMDB0141766	4-[3-(hydroxymethyl)oxiran-2-yl]phenol	n/a	C9H10O3	166.063	M-H20-H	-	147.045	1	n/a
M147T155	0.383047	1.09e-05	0.0021645	0.000318253	0.0078766	1.63922	exp:con	0.0737765	HMDB0240325	2-(4-Hydroxyphenyl)propionate	n/a	C9H9O3	165.056	M-H20-H	-	147.045	1	n/a
M147T155	0.383047	1.09e-05	0.0021645	0.000318253	0.0078766	1.63922	exp:con	0.0737765	HMDB0000563	D-Phenyllactic acid	C05607	C9H10O3	166.063	M-H20-H	-	147.045	1	map00360 Phenylalanine metabolism;map00960 Tropane, piperidine and pyridine alkaloid biosynthesis;map01064 Biosynthesis of alkaloids derived from ornithine, lysine and nicotinic acid;
M147T155	0.383047	1.09e-05	0.0021645	0.000318253	0.0078766	1.63922	exp:con	0.0737765	HMDB0033752	3-(2-Hydroxyphenyl)propanoic acid	C01198	C9H10O3	166.063	M-H20-H	-	147.045	1	map00360 Phenylalanine metabolism;map00624 Polycyclic aromatic hydrocarbon degradation;map01120 Microbial metabolism in diverse environments;
M147T155	0.383047	1.09e-05	0.0021645	0.000318253	0.0078766	1.63922	exp:con	0.0737765	HMDB0032605	Methyl 2-methoxybenzoate	n/a	C9H10O3	166.063	M-H20-H	-	147.045	1	n/a
M147T155	0.383047	1.09e-05	0.0021645	0.000318253	0.0078766	1.63922	exp:con	0.0737765	HMDB0032573	Ethylparaben	n/a	C9H10O3	166.063	M-H20-H	-	147.045	1	n/a
M147T155	0.383047	1.09e-05	0.0021645	0.000318253	0.0078766	1.63922	exp:con	0.0737765	HMDB0032639	Methyl 4-methoxybenzoate	n/a	C9H10O3	166.063	M-H20-H	-	147.045	1	n/a
M147T155	0.383047	1.09e-05	0.0021645	0.000318253	0.0078766	1.63922	exp:con	0.0737765	HMDB0031132	3,4-Dihydroxyphenylacetone	n/a	C9H10O3	166.063	M-H20-H	-	147.045	1	n/a
M147T155	0.383047	1.09e-05	0.0021645	0.000318253	0.0078766	1.63922	exp:con	0.0737765	HMDB0032138	3,4-Dimethoxybenzaldehyde	C02201	C9H10O3	166.063	M-H20-H	-	147.045	1	n/a
M147T155	0.383047	1.09e-05	0.0021645	0.000318253	0.0078766	1.63922	exp:con	0.0737765	HMDB0142137	2-hydroxy-2-phenylpropanoic acid	n/a	C9H10O3	166.063	M-H20-H	-	147.045	1	n/a
M147T155	0.383047	1.09e-05	0.0021645	0.000318253	0.0078766	1.63922	exp:con	0.0737765	HMDB0041683	4-Hydroxyphenyl-2-propionic acid	C03080	C9H10O3	166.063	M-H20-H	-	147.045	1	n/a
M147T155	0.383047	1.09e-05	0.0021645	0.000318253	0.0078766	1.63922	exp:con	0.0737765	HMDB0062590	Tropate	C01456	C9H10O3	166.063	M-H20-H	-	147.045	1	map00960 Tropane, piperidine and pyridine alkaloid biosynthesis;map01064 Biosynthesis of alkaloids derived from ornithine, lysine and nicotinic acid;map01110 Biosynthesis of secondary metabolites;
M147T155	0.383047	1.09e-05	0.0021645	0.000318253	0.0078766	1.63922	exp:con	0.0737765	HMDB0059969	3-Methoxyphenylacetic acid	n/a	C9H10O3	166.063	M-H20-H	-	147.045	1	n/a
M147T155	0.383047	1.09e-05	0.0021645	0.000318253	0.0078766	1.63922	exp:con	0.0737765	HMDB0034243	Ipomeanine	n/a	C9H10O3	166.063	M-H20-H	-	147.045	1	n/a
M147T155	0.383047	1.09e-05	0.0021645	0.000318253	0.0078766	1.63922	exp:con	0.0737765	HMDB0040645	3-Hydroxy-1-(4-hydroxyphenyl)-1-propanone	n/a	C9H10O3	166.063	M-H20-H	-	147.045	1	n/a
M147T155	0.383047	1.09e-05	0.0021645	0.000318253	0.0078766	1.63922	exp:con	0.0737765	HMDB0032030	Guaicyl acetate	n/a	C9H10O3	166.063	M-H20-H	-	147.045	1	n/a
M147T155	0.383047	1.09e-05	0.0021645	0.000318253	0.0078766	1.63922	exp:con	0.0737765	HMDB0002199	Desaminotyrosine	C01744	C9H10O3	166.063	M-H20-H	-	147.045	1	n/a
M147T155	0.383047	1.09e-05	0.0021645	0.000318253	0.0078766	1.63922	exp:con	0.0737765	HMDB0000375	3-(3-Hydroxyphenyl)propanoic acid	C11457	C9H10O3	166.063	M-H20-H	-	147.045	1	map00360 Phenylalanine metabolism;map01120 Microbial metabolism in diverse environments;map01220 Degradation of aromatic compounds;
M147T155	0.383047	1.09e-05	0.0021645	0.000318253	0.0078766	1.63922	exp:con	0.0737765	HMDB0000748	L-3-Phenyllactic acid	C05607	C9H10O3	166.063	M-H20-H	-	147.045	1	map00360 Phenylalanine metabolism;map00960 Tropane, piperidine and pyridine alkaloid biosynthesis;map01064 Biosynthesis of alkaloids derived from ornithine, lysine and nicotinic acid;
M147T155	0.383047	1.09e-05	0.0021645	0.000318253	0.0078766	1.63922	exp:con	0.0737765	HMDB0000779	Phenyllactic acid	C01479	C9H10O3	166.063	M-H20-H	-	147.045	1	map00960 Tropane, piperidine and pyridine alkaloid biosynthesis;map01110 Biosynthesis of secondary metabolites;
M147T155	0.383047	1.09e-05	0.0021645	0.000318253	0.0078766	1.63922	exp:con	0.0737765	HMDB0002072	4-Methoxyphenylacetic acid	n/a	C9H10O3	166.063	M-H20-H	-	147.045	1	n/a
M147T155	0.383047	1.09e-05	0.0021645	0.000318253	0.0078766	1.63922	exp:con	0.0737765	HMDB0002229	3-Phenoxypropionic acid	n/a	C9H10O3	166.063	M-H20-H	-	147.045	1	n/a
M147T155	0.383047	1.09e-05	0.0021645	0.000318253	0.0078766	1.63922	exp:con	0.0737765	HMDB0005175	Homovanillin	C05581	C9H10O3	166.063	M-H20-H	-	147.045	1	map00350 Tyrosine metabolism;map01100 Metabolic pathways;
M147T155	0.383047	1.09e-05	0.0021645	0.000318253	0.0078766	1.63922	exp:con	0.0737765	HMDB0029817	Ethyl salicylate	n/a	C9H10O3	166.063	M-H20-H	-	147.045	1	n/a
M147T155	0.383047	1.09e-05	0.0021645	0.000318253	0.0078766	1.63922	exp:con	0.0737765	HMDB0034993	4-Methoxybenzyl formate	n/a	C9H10O3	166.063	M-H20-H	-	147.045	1	n/a
M147T155	0.383047	1.09e-05	0.0021645	0.000318253	0.0078766	1.63922	exp:con	0.0737765	HMDB0029665	Ethyl vanillin	n/a	C9H10O3	166.063	M-H20-H	-	147.045	1	n/a
M147T155	0.383047	1.09e-05	0.0021645	0.000318253	0.0078766	1.63922	exp:con	0.0737765	HMDB0124925	3-hydroxy-3-phenylpropanoic acid	n/a	C9H10O3	166.063	M-H20-H	-	147.045	1	n/a
M147T155	0.383047	1.09e-05	0.0021645	0.000318253	0.0078766	1.63922	exp:con	0.0737765	HMDB0168657	Ethyl 3-hydroxybenzoate	n/a	C9H10O3	166.063	M-H20-H	-	147.045	1	n/a
M147T155	0.383047	1.09e-05	0.0021645	0.000318253	0.0078766	1.63922	exp:con	0.0737765	HMDB0062026	703-23-1	n/a	C9H10O3	166.063	M-H20-H	-	147.045	1	n/a
M167T154	3.06575	3.55e-07	0.0021645	4.84e-05	0.0078766	1.78709	exp:con	0.0921628	HMDB0041026	Erinapyrone C	n/a	C8H10O5	186.053	M-H20-H	-	167.034	3	n/a
M167T154	3.06575	3.55e-07	0.0021645	4.84e-05	0.0078766	1.78709	exp:con	0.0921628	HMDB0132202	2,4-dimethoxyphloroglucinol	n/a	C8H10O5	186.053	M-H20-H	-	167.034	3	n/a
M216T139	3.94409	7.6e-07	0.0021645	8.42e-05	0.0078766	1.75985	exp:con	0.150901	HMDB0181164	{[1-oxo-1-(1,4,5,6-tetrahydropyridin-2-yl)propan-2-yl]oxy}sulfonic acid	n/a	C8H13NO5S	235.051	M-H20-H	-	216.033	1	n/a
M216T139	3.94409	7.6e-07	0.0021645	8.42e-05	0.0078766	1.75985	exp:con	0.150901	HMDB0181166	[3-oxo-3-(1,4,5,6-tetrahydropyridin-2-yl)propoxy]sulfonic acid	n/a	C8H13NO5S	235.051	M-H20-H	-	216.033	1	n/a
M255T63	2.02831	6.12e-05	0.0021645	0.000843361	0.0078766	1.30855	exp:con	0.0522763	HMDB0032764	N2-Succinoylarginine	n/a	C10H18N4O5	274.128	M-H20-H	-	255.109	3	n/a
M255T63	2.02831	6.12e-05	0.0021645	0.000843361	0.0078766	1.30855	exp:con	0.0522763	HMDB0028811	Glutaminyl-Gamma-glutamate	n/a	C10H18N4O5	274.128	M-H20-H	-	255.109	3	n/a
M255T63	2.02831	6.12e-05	0.0021645	0.000843361	0.0078766	1.30855	exp:con	0.0522763	HMDB0029163	Glutaminyl-Gamma-glutamate	n/a	C10H18N4O5	274.128	M-H20-H	-	255.109	3	n/a
M255T63	2.02831	6.12e-05	0.0021645	0.000843361	0.0078766	1.30855	exp:con	0.0522763	HMDB0028795	Glutaminylglutamine	n/a	C10H18N4O5	274.128	M-H20-H	-	255.109	3	n/a
M256T59	2.31031	0.000144071	0.0021645	0.00147435	0.0078766	1.2019	exp:con	0.139875	HMDB0005766	Norophthalmic acid	n/a	C10H17N3O6	275.112	M-H20-H	-	256.093	4	n/a
M256T59	2.31031	0.000144071	0.0021645	0.00147435	0.0078766	1.2019	exp:con	0.139875	HMDB0028817	Glutamylglutamine	n/a	C10H17N3O6	275.112	M-H20-H	-	256.093	4	n/a
M256T59	2.31031	0.000144071	0.0021645	0.00147435	0.0078766	1.2019	exp:con	0.139875	HMDB0028796	Glutaminylglutamic acid	n/a	C10H17N3O6	275.112	M-H20-H	-	256.093	4	n/a
M256T59	2.31031	0.000144071	0.0021645	0.00147435	0.0078766	1.2019	exp:con	0.139875	HMDB0029147	N-gamma-Glutamylglutamine	n/a	C10H17N3O6	275.112	M-H20-H	-	256.093	4	n/a
M256T59	2.31031	0.000144071	0.0021645	0.00147435	0.0078766	1.2019	exp:con	0.139875	HMDB0011738	N2-gamma-Glutamylglutamine	C05283	C10H17N3O6	275.112	M-H20-H	-	256.093	4	n/a
M256T59	2.31031	0.000144071	0.0021645	0.00147435	0.0078766	1.2019	exp:con	0.139875	HMDB0028833	Glutamyl-Gamma-glutamate	n/a	C10H17N3O6	275.112	M-H20-H	-	256.093	4	n/a
M273T98	2.01381	0.00342169	0.004329	0.0126293	0.0134018	1.22943	exp:con	0.0615063	HMDB0166568	6-{[(2Z)-3-carboxyprop-2-enoyl]oxy}-3,4,5-trihydroxyoxane-2-carboxylic acid	n/a	C10H12O10	292.043	M-H20-H	-	273.025	4	n/a
M273T98	2.01381	0.00342169	0.004329	0.0126293	0.0134018	1.22943	exp:con	0.0615063	HMDB0187652	6-(3-formyloxirane-2-carbonyloxy)-3,4,5-trihydroxyoxane-2-carboxylic acid	n/a	C10H12O10	292.043	M-H20-H	-	273.025	4	n/a
M273T98	2.01381	0.00342169	0.004329	0.0126293	0.0134018	1.22943	exp:con	0.0615063	HMDB0135190	(2-oxo-1,2-diphenylethoxy)sulfonic acid	n/a	C14H12O5S	292.041	M-H20-H	-	273.022	5	n/a
M273T98	2.01381	0.00342169	0.004329	0.0126293	0.0134018	1.22943	exp:con	0.0615063	HMDB0151384	(2-benzyl-3-methanesulfinylpropoxy)sulfonic acid	n/a	C11H16O5S2	292.044	M-H20-H	-	273.026	7	n/a
M289T142	2.29305	8.86e-06	0.0021645	0.000284555	0.0078766	1.45984	exp:con	0.0280382	HMDB0040692	4R,5R,6S-Trihydroxy-2-hydroxymethyl-2-cyclohexen-1-one 6-(2-hydroxy-6-methylbenzoate)	n/a	C15H16O7	308.09	M-H20-H	-	289.071	1	n/a
M289T142	2.29305	8.86e-06	0.0021645	0.000284555	0.0078766	1.45984	exp:con	0.0280382	HMDB0128179	4-[3-(3,4-dihydroxyphenyl)-2-hydroxypropyl]benzene-1,2,3,5-tetrol	n/a	C15H16O7	308.09	M-H20-H	-	289.071	1	n/a
M289T142	2.29305	8.86e-06	0.0021645	0.000284555	0.0078766	1.45984	exp:con	0.0280382	HMDB0128184	5-[2-hydroxy-3-(2,4,6-trihydroxyphenyl)propyl]benzene-1,2,4-triol	n/a	C15H16O7	308.09	M-H20-H	-	289.071	1	n/a
M289T142	2.29305	8.86e-06	0.0021645	0.000284555	0.0078766	1.45984	exp:con	0.0280382	HMDB0141543	5-[2-hydroxy-3-(2,4,6-trihydroxyphenyl)propyl]benzene-1,2,3-triol	n/a	C15H16O7	308.09	M-H20-H	-	289.071	1	n/a
M299T59	2.40339	0.000292805	0.0021645	0.00231005	0.0078766	1.38098	exp:con	0.0722737	HMDB0060950	fluvoxamino acid	n/a	C14H17F3N2O3	318.119	M-H20-H	-	299.101	8	n/a
M301T161	4.09889	0.000482078	0.0021645	0.00325693	0.0078766	2.03044	exp:con	0.0531559	HMDB0167580	2-(2-ethenyl-5,7-dihydroxy-4-oxo-4H-chromen-3-yl)-3-methoxy-3-oxopropanoic acid	n/a	C15H12O8	320.053	M-H20-H	-	301.035	2	n/a
M301T161	4.09889	0.000482078	0.0021645	0.00325693	0.0078766	2.03044	exp:con	0.0531559	HMDB0137821	5,7,8-trihydroxy-3-(2,3,4-trihydroxyphenyl)-3,4-dihydro-2H-1-benzopyran-4-one	n/a	C15H12O8	320.053	M-H20-H	-	301.035	2	n/a
M301T161	4.09889	0.000482078	0.0021645	0.00325693	0.0078766	2.03044	exp:con	0.0531559	HMDB0137819	5,7,8-trihydroxy-3-(2,4,5-trihydroxyphenyl)-3,4-dihydro-2H-1-benzopyran-4-one	n/a	C15H12O8	320.053	M-H20-H	-	301.035	2	n/a
M301T161	4.09889	0.000482078	0.0021645	0.00325693	0.0078766	2.03044	exp:con	0.0531559	HMDB0137816	3-(2,4-dihydroxyphenyl)-5,6,7,8-tetrahydroxy-3,4-dihydro-2H-1-benzopyran-4-one	n/a	C15H12O8	320.053	M-H20-H	-	301.035	2	n/a
M301T161	4.09889	0.000482078	0.0021645	0.00325693	0.0078766	2.03044	exp:con	0.0531559	HMDB0131931	5,6,7-trihydroxy-2-(2,4,5-trihydroxyphenyl)-3,4-dihydro-2H-1-benzopyran-4-one	n/a	C15H12O8	320.053	M-H20-H	-	301.035	2	n/a
M301T161	4.09889	0.000482078	0.0021645	0.00325693	0.0078766	2.03044	exp:con	0.0531559	HMDB0131929	(2E)-1-(2,3,4,6-tetrahydroxyphenyl)-3-(2,3,4-trihydroxyphenyl)prop-2-en-1-one	n/a	C15H12O8	320.053	M-H20-H	-	301.035	2	n/a
M301T161	4.09889	0.000482078	0.0021645	0.00325693	0.0078766	2.03044	exp:con	0.0531559	HMDB0131932	(2E)-1-(2,3,4,6-tetrahydroxyphenyl)-3-(2,4,5-trihydroxyphenyl)prop-2-en-1-one	n/a	C15H12O8	320.053	M-H20-H	-	301.035	2	n/a
M301T161	4.09889	0.000482078	0.0021645	0.00325693	0.0078766	2.03044	exp:con	0.0531559	HMDB0131928	5,6,7-trihydroxy-2-(2,3,4-trihydroxyphenyl)-3,4-dihydro-2H-1-benzopyran-4-one	n/a	C15H12O8	320.053	M-H20-H	-	301.035	2	n/a
M301T161	4.09889	0.000482078	0.0021645	0.00325693	0.0078766	2.03044	exp:con	0.0531559	HMDB0131925	(2E)-1-(2,3,4,6-tetrahydroxyphenyl)-3-(3,4,5-trihydroxyphenyl)prop-2-en-1-one	n/a	C15H12O8	320.053	M-H20-H	-	301.035	2	n/a
M301T161	4.09889	0.000482078	0.0021645	0.00325693	0.0078766	2.03044	exp:con	0.0531559	HMDB0131759	2-(2,4-dihydroxyphenyl)-3,5,6,7-tetrahydroxy-3,4-dihydro-2H-1-benzopyran-4-one	n/a	C15H12O8	320.053	M-H20-H	-	301.035	2	n/a
M301T161	4.09889	0.000482078	0.0021645	0.00325693	0.0078766	2.03044	exp:con	0.0531559	HMDB0131760	3-(2,4-dihydroxyphenyl)-1-(2,3,4,6-tetrahydroxyphenyl)propane-1,2-dione	n/a	C15H12O8	320.053	M-H20-H	-	301.035	2	n/a
M301T161	4.09889	0.000482078	0.0021645	0.00325693	0.0078766	2.03044	exp:con	0.0531559	HMDB0128213	5,6,7-trihydroxy-2-(3,4,5-trihydroxyphenyl)-3,4-dihydro-2H-1-benzopyran-4-one	n/a	C15H12O8	320.053	M-H20-H	-	301.035	2	n/a
M301T161	4.09889	0.000482078	0.0021645	0.00325693	0.0078766	2.03044	exp:con	0.0531559	HMDB0126569	3,5,7-trihydroxy-2-(2,4,5-trihydroxyphenyl)-3,4-dihydro-2H-1-benzopyran-4-one	n/a	C15H12O8	320.053	M-H20-H	-	301.035	2	n/a
M301T161	4.09889	0.000482078	0.0021645	0.00325693	0.0078766	2.03044	exp:con	0.0531559	HMDB0140538	2-(3,4-dihydroxyphenyl)-5,6,7,8-tetrahydroxy-3,4-dihydro-2H-1-benzopyran-4-one	n/a	C15H12O8	320.053	M-H20-H	-	301.035	2	n/a
M301T161	4.09889	0.000482078	0.0021645	0.00325693	0.0078766	2.03044	exp:con	0.0531559	HMDB0140542	3-(3,4-dihydroxyphenyl)-1-(2,3,4,5,6-pentahydroxyphenyl)prop-2-en-1-one	n/a	C15H12O8	320.053	M-H20-H	-	301.035	2	n/a
M301T161	4.09889	0.000482078	0.0021645	0.00325693	0.0078766	2.03044	exp:con	0.0531559	HMDB0140556	2-(3,5-dihydroxyphenyl)-5,6,7,8-tetrahydroxy-3,4-dihydro-2H-1-benzopyran-4-one	n/a	C15H12O8	320.053	M-H20-H	-	301.035	2	n/a
M301T161	4.09889	0.000482078	0.0021645	0.00325693	0.0078766	2.03044	exp:con	0.0531559	HMDB0167579	2-(2-ethenyl-5,6-dihydroxy-4-oxo-4H-chromen-3-yl)-3-methoxy-3-oxopropanoic acid	n/a	C15H12O8	320.053	M-H20-H	-	301.035	2	n/a
M301T161	4.09889	0.000482078	0.0021645	0.00325693	0.0078766	2.03044	exp:con	0.0531559	HMDB0167581	2-[5-hydroxy-2-(oxiran-2-yl)-4-oxo-4H-chromen-3-yl]-3-methoxy-3-oxopropanoic acid	n/a	C15H12O8	320.053	M-H20-H	-	301.035	2	n/a
M301T161	4.09889	0.000482078	0.0021645	0.00325693	0.0078766	2.03044	exp:con	0.0531559	HMDB0167582	2-(2-ethenyl-5-hydroxy-4-oxo-4H-chromen-3-yl)-2-hydroxy-3-methoxy-3-oxopropanoic acid	n/a	C15H12O8	320.053	M-H20-H	-	301.035	2	n/a
M301T161	4.09889	0.000482078	0.0021645	0.00325693	0.0078766	2.03044	exp:con	0.0531559	HMDB0152484	3,5,6,7,8-pentahydroxy-2-(3-hydroxyphenyl)-3,4-dihydro-2H-1-benzopyran-4-one	n/a	C15H12O8	320.053	M-H20-H	-	301.035	2	n/a
M301T161	4.09889	0.000482078	0.0021645	0.00325693	0.0078766	2.03044	exp:con	0.0531559	HMDB0152479	2,3-Dihydrogossypetin	n/a	C15H12O8	320.053	M-H20-H	-	301.035	2	n/a
M301T161	4.09889	0.000482078	0.0021645	0.00325693	0.0078766	2.03044	exp:con	0.0531559	HMDB0152402	2-(3,5-dihydroxyphenyl)-3,5,7,8-tetrahydroxy-3,4-dihydro-2H-1-benzopyran-4-one	n/a	C15H12O8	320.053	M-H20-H	-	301.035	2	n/a
M301T161	4.09889	0.000482078	0.0021645	0.00325693	0.0078766	2.03044	exp:con	0.0531559	HMDB0152036	1-(2,3,4,6-tetrahydroxyphenyl)-3-(2,4,5-trihydroxyphenyl)prop-2-en-1-one	n/a	C15H12O8	320.053	M-H20-H	-	301.035	2	n/a
M301T161	4.09889	0.000482078	0.0021645	0.00325693	0.0078766	2.03044	exp:con	0.0531559	HMDB0152035	5,7,8-trihydroxy-2-(2,4,5-trihydroxyphenyl)-3,4-dihydro-2H-1-benzopyran-4-one	n/a	C15H12O8	320.053	M-H20-H	-	301.035	2	n/a
M301T161	4.09889	0.000482078	0.0021645	0.00325693	0.0078766	2.03044	exp:con	0.0531559	HMDB0152037	2-(1,3-dihydroxy-4-oxocyclohex-2-en-1-yl)-5,7,8-trihydroxy-4H-chromen-4-one	n/a	C15H12O8	320.053	M-H20-H	-	301.035	2	n/a
M301T161	4.09889	0.000482078	0.0021645	0.00325693	0.0078766	2.03044	exp:con	0.0531559	HMDB0152038	2-(1,5-dihydroxy-4-oxocyclohex-2-en-1-yl)-5,7,8-trihydroxy-4H-chromen-4-one	n/a	C15H12O8	320.053	M-H20-H	-	301.035	2	n/a
M301T161	4.09889	0.000482078	0.0021645	0.00325693	0.0078766	2.03044	exp:con	0.0531559	HMDB0152031	1-(2,3,4,6-tetrahydroxyphenyl)-3-(2,3,4-trihydroxyphenyl)prop-2-en-1-one	n/a	C15H12O8	320.053	M-H20-H	-	301.035	2	n/a
M301T161	4.09889	0.000482078	0.0021645	0.00325693	0.0078766	2.03044	exp:con	0.0531559	HMDB0152029	5,7,8-trihydroxy-2-(2,3,4-trihydroxyphenyl)-3,4-dihydro-2H-1-benzopyran-4-one	n/a	C15H12O8	320.053	M-H20-H	-	301.035	2	n/a
M301T161	4.09889	0.000482078	0.0021645	0.00325693	0.0078766	2.03044	exp:con	0.0531559	HMDB0126570	3-(2,4,5-trihydroxyphenyl)-1-(2,4,6-trihydroxyphenyl)propane-1,2-dione	n/a	C15H12O8	320.053	M-H20-H	-	301.035	2	n/a
M301T161	4.09889	0.000482078	0.0021645	0.00325693	0.0078766	2.03044	exp:con	0.0531559	HMDB0126567	3-(2,3,4-trihydroxyphenyl)-1-(2,4,6-trihydroxyphenyl)propane-1,2-dione	n/a	C15H12O8	320.053	M-H20-H	-	301.035	2	n/a
M301T161	4.09889	0.000482078	0.0021645	0.00325693	0.0078766	2.03044	exp:con	0.0531559	HMDB0126564	3-(3,4-dihydroxyphenyl)-1-(2,3,4,6-tetrahydroxyphenyl)propane-1,2-dione	n/a	C15H12O8	320.053	M-H20-H	-	301.035	2	n/a
M301T161	4.09889	0.000482078	0.0021645	0.00325693	0.0078766	2.03044	exp:con	0.0531559	HMDB0126566	3,5,7-trihydroxy-2-(2,3,4-trihydroxyphenyl)-3,4-dihydro-2H-1-benzopyran-4-one	n/a	C15H12O8	320.053	M-H20-H	-	301.035	2	n/a
M301T161	4.09889	0.000482078	0.0021645	0.00325693	0.0078766	2.03044	exp:con	0.0531559	HMDB0125219	3-(3,5-dihydroxyphenyl)-1-(2,3,4,6-tetrahydroxyphenyl)propane-1,2-dione	n/a	C15H12O8	320.053	M-H20-H	-	301.035	2	n/a
M301T161	4.09889	0.000482078	0.0021645	0.00325693	0.0078766	2.03044	exp:con	0.0531559	HMDB0125216	2-(3,5-dihydroxyphenyl)-3,5,6,7-tetrahydroxy-3,4-dihydro-2H-1-benzopyran-4-one	n/a	C15H12O8	320.053	M-H20-H	-	301.035	2	n/a
M301T161	4.09889	0.000482078	0.0021645	0.00325693	0.0078766	2.03044	exp:con	0.0531559	HMDB0125207	1-(2,4,6-trihydroxyphenyl)-3-(3,4,5-trihydroxyphenyl)propane-1,2-dione	n/a	C15H12O8	320.053	M-H20-H	-	301.035	2	n/a
M301T161	4.09889	0.000482078	0.0021645	0.00325693	0.0078766	2.03044	exp:con	0.0531559	HMDB0125079	5,6,7-trihydroxy-3-(2,4,5-trihydroxyphenyl)-3,4-dihydro-2H-1-benzopyran-4-one	n/a	C15H12O8	320.053	M-H20-H	-	301.035	2	n/a
M301T161	4.09889	0.000482078	0.0021645	0.00325693	0.0078766	2.03044	exp:con	0.0531559	HMDB0125067	6,7,8-trihydroxy-3-(2,4,5-trihydroxyphenyl)-3,4-dihydro-2H-1-benzopyran-4-one	n/a	C15H12O8	320.053	M-H20-H	-	301.035	2	n/a
M301T161	4.09889	0.000482078	0.0021645	0.00325693	0.0078766	2.03044	exp:con	0.0531559	HMDB0125052	6,7-dihydroxy-3-(2,3,4,6-tetrahydroxyphenyl)-3,4-dihydro-2H-1-benzopyran-4-one	n/a	C15H12O8	320.053	M-H20-H	-	301.035	2	n/a
M301T161	4.09889	0.000482078	0.0021645	0.00325693	0.0078766	2.03044	exp:con	0.0531559	HMDB0125037	6,7-dihydroxy-3-(2,3,4,5-tetrahydroxyphenyl)-3,4-dihydro-2H-1-benzopyran-4-one	n/a	C15H12O8	320.053	M-H20-H	-	301.035	2	n/a
M301T161	4.09889	0.000482078	0.0021645	0.00325693	0.0078766	2.03044	exp:con	0.0531559	HMDB0126563	2-(3,4-dihydroxyphenyl)-3,5,6,7-tetrahydroxy-3,4-dihydro-2H-1-benzopyran-4-one	n/a	C15H12O8	320.053	M-H20-H	-	301.035	2	n/a
M301T161	4.09889	0.000482078	0.0021645	0.00325693	0.0078766	2.03044	exp:con	0.0531559	HMDB0030835	(±)-Dihydromyricetin	n/a	C15H12O8	320.053	M-H20-H	-	301.035	2	n/a
M319T55	0.124381	0.00321122	0.004329	0.01206	0.0134018	1.74439	exp:con	0.130031	HMDB0133621	3,4,5-trihydroxy-6-{[(2E)-2-methyl-3-phenylprop-2-enoyl]oxy}oxane-2-carboxylic acid	n/a	C16H18O8	338.1	M-H20-H	-	319.082	7	n/a
M319T55	0.124381	0.00321122	0.004329	0.01206	0.0134018	1.74439	exp:con	0.130031	HMDB0133756	3,4,5-trihydroxy-6-{[(3E)-2-oxo-4-phenylbut-3-en-1-yl]oxy}oxane-2-carboxylic acid	n/a	C16H18O8	338.1	M-H20-H	-	319.082	7	n/a
M319T55	0.124381	0.00321122	0.004329	0.01206	0.0134018	1.74439	exp:con	0.130031	HMDB0133622	3,4,5-trihydroxy-6-[(2Z)-3-oxo-2-(phenylmethylidene)propoxy]oxane-2-carboxylic acid	n/a	C16H18O8	338.1	M-H20-H	-	319.082	7	n/a
M319T55	0.124381	0.00321122	0.004329	0.01206	0.0134018	1.74439	exp:con	0.130031	HMDB0133625	3,4,5-trihydroxy-6-{3-[(1Z)-2-methyl-3-oxoprop-1-en-1-yl]phenoxy}oxane-2-carboxylic acid	n/a	C16H18O8	338.1	M-H20-H	-	319.082	7	n/a
M319T55	0.124381	0.00321122	0.004329	0.01206	0.0134018	1.74439	exp:con	0.130031	HMDB0157144	3,4,5-trihydroxy-6-[(2-phenylbut-3-enoyl)oxy]oxane-2-carboxylic acid	n/a	C16H18O8	338.1	M-H20-H	-	319.082	7	n/a
M319T55	0.124381	0.00321122	0.004329	0.01206	0.0134018	1.74439	exp:con	0.130031	HMDB0151250	3,4,5-trihydroxy-6-[4-(2-methyl-3-oxoprop-1-en-1-yl)phenoxy]oxane-2-carboxylic acid	n/a	C16H18O8	338.1	M-H20-H	-	319.082	7	n/a
M319T55	0.124381	0.00321122	0.004329	0.01206	0.0134018	1.74439	exp:con	0.130031	HMDB0133764	3,4,5-trihydroxy-6-{2-[(1E)-3-oxobut-1-en-1-yl]phenoxy}oxane-2-carboxylic acid	n/a	C16H18O8	338.1	M-H20-H	-	319.082	7	n/a
M319T55	0.124381	0.00321122	0.004329	0.01206	0.0134018	1.74439	exp:con	0.130031	HMDB0133758	3,4,5-trihydroxy-6-{3-[(1E)-3-oxobut-1-en-1-yl]phenoxy}oxane-2-carboxylic acid	n/a	C16H18O8	338.1	M-H20-H	-	319.082	7	n/a
M319T55	0.124381	0.00321122	0.004329	0.01206	0.0134018	1.74439	exp:con	0.130031	HMDB0133760	3,4,5-trihydroxy-6-{4-[(1E)-3-oxobut-1-en-1-yl]phenoxy}oxane-2-carboxylic acid	n/a	C16H18O8	338.1	M-H20-H	-	319.082	7	n/a
M319T55	0.124381	0.00321122	0.004329	0.01206	0.0134018	1.74439	exp:con	0.130031	HMDB0133633	3,4,5-trihydroxy-6-{2-[(1Z)-2-methyl-3-oxoprop-1-en-1-yl]phenoxy}oxane-2-carboxylic acid	n/a	C16H18O8	338.1	M-H20-H	-	319.082	7	n/a
M319T55	0.124381	0.00321122	0.004329	0.01206	0.0134018	1.74439	exp:con	0.130031	HMDB0133628	3,4,5-trihydroxy-6-{4-[(1Z)-2-methyl-3-oxoprop-1-en-1-yl]phenoxy}oxane-2-carboxylic acid	n/a	C16H18O8	338.1	M-H20-H	-	319.082	7	n/a
M319T55	0.124381	0.00321122	0.004329	0.01206	0.0134018	1.74439	exp:con	0.130031	HMDB0029681	3-O-p-Coumaroylquinic acid	n/a	C16H18O8	338.1	M-H20-H	-	319.082	7	n/a
M319T55	0.124381	0.00321122	0.004329	0.01206	0.0134018	1.74439	exp:con	0.130031	HMDB0041191	Hydrojuglone glucoside	n/a	C16H18O8	338.1	M-H20-H	-	319.082	7	n/a
M319T55	0.124381	0.00321122	0.004329	0.01206	0.0134018	1.74439	exp:con	0.130031	HMDB0034242	alpha-Hydrojuglone 4-O-b-D-glucoside	n/a	C16H18O8	338.1	M-H20-H	-	319.082	7	n/a
M371T63	5.04717	1.15e-05	0.0021645	0.00032457	0.0078766	1.80025	exp:con	2.02e-12	HMDB0034223	2,3,4,5,6-Penta-O-acetyl-D-glucose	n/a	C16H22O11	390.116	M-H20-H	-	371.098	7	n/a
M371T63	5.04717	1.15e-05	0.0021645	0.00032457	0.0078766	1.80025	exp:con	2.02e-12	HMDB0170519	6-{[(4E,6E)-7-carboxy-2-hydroxy-2,7-dimethylhepta-4,6-dienoyl]oxy}-3,4,5-trihydroxyoxane-2-carboxylic acid	n/a	C16H22O11	390.116	M-H20-H	-	371.098	7	n/a
M371T63	5.04717	1.15e-05	0.0021645	0.00032457	0.0078766	1.80025	exp:con	2.02e-12	HMDB0170518	(2E,4E)-7-[(6-carboxy-3,4,5-trihydroxyoxan-2-yl)oxy]-2,7-dimethylocta-2,4-dienedioic acid	n/a	C16H22O11	390.116	M-H20-H	-	371.098	7	n/a
M371T63	5.04717	1.15e-05	0.0021645	0.00032457	0.0078766	1.80025	exp:con	2.02e-12	HMDB0170520	6-{[(2E,4E)-7-carboxy-7-hydroxy-2,7-dimethylhepta-2,4-dienoyl]oxy}-3,4,5-trihydroxyoxane-2-carboxylic acid	n/a	C16H22O11	390.116	M-H20-H	-	371.098	7	n/a
M371T63	5.04717	1.15e-05	0.0021645	0.00032457	0.0078766	1.80025	exp:con	2.02e-12	HMDB0170523	6-{[(2E,4E)-7-carboxy-2-(hydroxymethyl)-7-methylhepta-2,4-dienoyl]oxy}-3,4,5-trihydroxyoxane-2-carboxylic acid	n/a	C16H22O11	390.116	M-H20-H	-	371.098	7	n/a
M371T63	5.04717	1.15e-05	0.0021645	0.00032457	0.0078766	1.80025	exp:con	2.02e-12	HMDB0170522	6-{[(4E,6E)-7-carboxy-7-(hydroxymethyl)-2-methylhepta-4,6-dienoyl]oxy}-3,4,5-trihydroxyoxane-2-carboxylic acid	n/a	C16H22O11	390.116	M-H20-H	-	371.098	7	n/a
M371T63	5.04717	1.15e-05	0.0021645	0.00032457	0.0078766	1.80025	exp:con	2.02e-12	HMDB0170521	(2E,4E)-2-{[(6-carboxy-3,4,5-trihydroxyoxan-2-yl)oxy]methyl}-7-methylocta-2,4-dienedioic acid	n/a	C16H22O11	390.116	M-H20-H	-	371.098	7	n/a
M371T63	5.04717	1.15e-05	0.0021645	0.00032457	0.0078766	1.80025	exp:con	2.02e-12	HMDB0170525	(2E)-6-[(6-carboxy-3,4,5-trihydroxyoxan-2-yl)oxy]-2,7-dimethylocta-2,4-dienedioic acid	n/a	C16H22O11	390.116	M-H20-H	-	371.098	7	n/a
M371T63	5.04717	1.15e-05	0.0021645	0.00032457	0.0078766	1.80025	exp:con	2.02e-12	HMDB0170526	6-{[(4E,6E)-7-carboxy-3-hydroxy-2,7-dimethylhepta-4,6-dienoyl]oxy}-3,4,5-trihydroxyoxane-2-carboxylic acid	n/a	C16H22O11	390.116	M-H20-H	-	371.098	7	n/a
M371T63	5.04717	1.15e-05	0.0021645	0.00032457	0.0078766	1.80025	exp:con	2.02e-12	HMDB0170527	6-{[(2E,4E)-7-carboxy-6-hydroxy-2,7-dimethylhepta-2,4-dienoyl]oxy}-3,4,5-trihydroxyoxane-2-carboxylic acid	n/a	C16H22O11	390.116	M-H20-H	-	371.098	7	n/a
M371T63	5.04717	1.15e-05	0.0021645	0.00032457	0.0078766	1.80025	exp:con	2.02e-12	HMDB0170529	6-{[(4E)-5-(3-carboxy-3-methyloxiran-2-yl)-2-methylpent-4-enoyl]oxy}-3,4,5-trihydroxyoxane-2-carboxylic acid	n/a	C16H22O11	390.116	M-H20-H	-	371.098	7	n/a
M371T63	5.04717	1.15e-05	0.0021645	0.00032457	0.0078766	1.80025	exp:con	2.02e-12	HMDB0170532	6-[(3-{3-[(1E)-2-carboxy-2-methyleth-1-en-1-yl]oxiran-2-yl}-2-methylpropanoyl)oxy]-3,4,5-trihydroxyoxane-2-carboxylic acid	n/a	C16H22O11	390.116	M-H20-H	-	371.098	7	n/a
M371T63	5.04717	1.15e-05	0.0021645	0.00032457	0.0078766	1.80025	exp:con	2.02e-12	HMDB0170530	6-{3-[(1E)-4-carboxy-4-methylbut-1-en-1-yl]-2-methyloxirane-2-carbonyloxy}-3,4,5-trihydroxyoxane-2-carboxylic acid	n/a	C16H22O11	390.116	M-H20-H	-	371.098	7	n/a
M371T63	5.04717	1.15e-05	0.0021645	0.00032457	0.0078766	1.80025	exp:con	2.02e-12	HMDB0170536	(2E,4E)-7-{[(6-carboxy-3,4,5-trihydroxyoxan-2-yl)oxy]methyl}-2-methylocta-2,4-dienedioic acid	n/a	C16H22O11	390.116	M-H20-H	-	371.098	7	n/a
M371T63	5.04717	1.15e-05	0.0021645	0.00032457	0.0078766	1.80025	exp:con	2.02e-12	HMDB0170533	6-{[(2E)-3-[3-(2-carboxy-2-methylethyl)oxiran-2-yl]-2-methylprop-2-enoyl]oxy}-3,4,5-trihydroxyoxane-2-carboxylic acid	n/a	C16H22O11	390.116	M-H20-H	-	371.098	7	n/a
M371T63	5.04717	1.15e-05	0.0021645	0.00032457	0.0078766	1.80025	exp:con	2.02e-12	HMDB0170537	6-{[(4E,6E)-7-carboxy-2-(hydroxymethyl)-7-methylhepta-4,6-dienoyl]oxy}-3,4,5-trihydroxyoxane-2-carboxylic acid	n/a	C16H22O11	390.116	M-H20-H	-	371.098	7	n/a
M371T63	5.04717	1.15e-05	0.0021645	0.00032457	0.0078766	1.80025	exp:con	2.02e-12	HMDB0035608	Monotropein	C09788	C16H22O11	390.116	M-H20-H	-	371.098	7	n/a
M371T63	5.04717	1.15e-05	0.0021645	0.00032457	0.0078766	1.80025	exp:con	2.02e-12	HMDB0170538	6-{[(2E,4E)-7-carboxy-7-(hydroxymethyl)-2-methylhepta-2,4-dienoyl]oxy}-3,4,5-trihydroxyoxane-2-carboxylic acid	n/a	C16H22O11	390.116	M-H20-H	-	371.098	7	n/a
M388T134	0.0375558	0.00444035	0.0021645	0.01525	0.0078766	2.20315	exp:con	0.140079	HMDB0149468	[5-(4-hydroxyphenyl)-6-methoxy-1-methyl-2-oxo-4-phenylpiperidin-3-yl]oxidanesulfonic acid	n/a	C19H21NO7S	407.104	M-H20-H	-	388.085	3	n/a
M388T134	0.0375558	0.00444035	0.0021645	0.01525	0.0078766	2.20315	exp:con	0.140079	HMDB0149467	[4-(5-hydroxy-2-methoxy-1-methyl-6-oxo-4-phenylpiperidin-3-yl)phenyl]oxidanesulfonic acid	n/a	C19H21NO7S	407.104	M-H20-H	-	388.085	3	n/a
M388T134	0.0375558	0.00444035	0.0021645	0.01525	0.0078766	2.20315	exp:con	0.140079	HMDB0149465	[4-(3-hydroxyphenyl)-6-methoxy-1-methyl-2-oxo-5-phenylpiperidin-3-yl]oxidanesulfonic acid	n/a	C19H21NO7S	407.104	M-H20-H	-	388.085	3	n/a
M388T134	0.0375558	0.00444035	0.0021645	0.01525	0.0078766	2.20315	exp:con	0.140079	HMDB0149471	[4-(4-hydroxyphenyl)-6-methoxy-1-methyl-2-oxo-5-phenylpiperidin-3-yl]oxidanesulfonic acid	n/a	C19H21NO7S	407.104	M-H20-H	-	388.085	3	n/a
M388T134	0.0375558	0.00444035	0.0021645	0.01525	0.0078766	2.20315	exp:con	0.140079	HMDB0149470	[4-(3-hydroxy-6-methoxy-1-methyl-2-oxo-5-phenylpiperidin-4-yl)phenyl]oxidanesulfonic acid	n/a	C19H21NO7S	407.104	M-H20-H	-	388.085	3	n/a
M388T134	0.0375558	0.00444035	0.0021645	0.01525	0.0078766	2.20315	exp:con	0.140079	HMDB0149475	[4-(2-hydroxyphenyl)-6-methoxy-1-methyl-2-oxo-5-phenylpiperidin-3-yl]oxidanesulfonic acid	n/a	C19H21NO7S	407.104	M-H20-H	-	388.085	3	n/a
M388T134	0.0375558	0.00444035	0.0021645	0.01525	0.0078766	2.20315	exp:con	0.140079	HMDB0149473	[5-(2-hydroxyphenyl)-6-methoxy-1-methyl-2-oxo-4-phenylpiperidin-3-yl]oxidanesulfonic acid	n/a	C19H21NO7S	407.104	M-H20-H	-	388.085	3	n/a
M388T134	0.0375558	0.00444035	0.0021645	0.01525	0.0078766	2.20315	exp:con	0.140079	HMDB0173733	{1-[(2E,4E,6E)-7-(2H-1,3-benzodioxol-5-yl)hepta-2,4,6-trienoyl]piperidin-3-yl}oxidanesulfonic acid	n/a	C19H21NO7S	407.104	M-H20-H	-	388.085	3	n/a
M388T134	0.0375558	0.00444035	0.0021645	0.01525	0.0078766	2.20315	exp:con	0.140079	HMDB0149462	[5-(3-hydroxyphenyl)-6-methoxy-1-methyl-2-oxo-4-phenylpiperidin-3-yl]oxidanesulfonic acid	n/a	C19H21NO7S	407.104	M-H20-H	-	388.085	3	n/a
M388T134	0.0375558	0.00444035	0.0021645	0.01525	0.0078766	2.20315	exp:con	0.140079	HMDB0149461	[3-(5-hydroxy-2-methoxy-1-methyl-6-oxo-4-phenylpiperidin-3-yl)phenyl]oxidanesulfonic acid	n/a	C19H21NO7S	407.104	M-H20-H	-	388.085	3	n/a
M388T134	0.0375558	0.00444035	0.0021645	0.01525	0.0078766	2.20315	exp:con	0.140079	HMDB0030257	Erysothiopine	n/a	C19H21NO7S	407.104	M-H20-H	-	388.085	3	n/a
M388T134	0.0375558	0.00444035	0.0021645	0.01525	0.0078766	2.20315	exp:con	0.140079	HMDB0061128	5-Hydroxy, 6-methoxy duloxetine sulfate	n/a	C19H21NO7S	407.104	M-H20-H	-	388.085	3	n/a
M388T134	0.0375558	0.00444035	0.0021645	0.01525	0.0078766	2.20315	exp:con	0.140079	HMDB0149456	(5-hydroxy-6-methoxy-1-methyl-2-oxo-4,5-diphenylpiperidin-3-yl)oxidanesulfonic acid	n/a	C19H21NO7S	407.104	M-H20-H	-	388.085	3	n/a
M388T134	0.0375558	0.00444035	0.0021645	0.01525	0.0078766	2.20315	exp:con	0.140079	HMDB0149459	(4-hydroxy-6-methoxy-1-methyl-2-oxo-4,5-diphenylpiperidin-3-yl)oxidanesulfonic acid	n/a	C19H21NO7S	407.104	M-H20-H	-	388.085	3	n/a
M388T134	0.0375558	0.00444035	0.0021645	0.01525	0.0078766	2.20315	exp:con	0.140079	HMDB0149464	[3-(3-hydroxy-6-methoxy-1-methyl-2-oxo-5-phenylpiperidin-4-yl)phenyl]oxidanesulfonic acid	n/a	C19H21NO7S	407.104	M-H20-H	-	388.085	3	n/a
M388T134	0.0375558	0.00444035	0.0021645	0.01525	0.0078766	2.20315	exp:con	0.140079	HMDB0187646	2-amino-4-({2-[(1-carboxy-3-oxopropyl)sulfanyl]-1-[(carboxymethyl)-C-hydroxycarbonimidoyl]ethyl}-C-hydroxycarbonimidoyl)butanoic acid	n/a	C14H21N3O9S	407.1	M-H20-H	-	388.081	7	n/a
M399T484	0.277928	0.00146086	0.00865801	0.00687784	0.0233787	1.67304	exp:con	0.0946146	HMDB0127903	4-(3,5-dihydroxy-7-sulfino-3,4-dihydro-2H-1-benzopyran-2-yl)-2-(sulfooxy)benzen-1-olate	n/a	C15H14O10S2	418.003	M-H20-H	-	398.984	10	n/a
M399T484	0.277928	0.00146086	0.00865801	0.00687784	0.0233787	1.67304	exp:con	0.0946146	HMDB0127807	3-hydroxy-2-[4-hydroxy-3-(sulfooxy)phenyl]-5-sulfino-3,4-dihydro-2H-1-benzopyran-7-olate	n/a	C15H14O10S2	418.003	M-H20-H	-	398.984	10	n/a
M417T137	11.364	2.64e-06	0.0021645	0.000149335	0.0078766	2.64196	exp:con	1.22e-07	HMDB0141807	3,4,5-trihydroxy-6-{3-hydroxy-5-[(E)-2-(3,4,5-trihydroxyphenyl)ethenyl]phenoxy}oxane-2-carboxylic acid	n/a	C20H20O11	436.101	M-H20-H	-	417.082	3	n/a
M417T137	11.364	2.64e-06	0.0021645	0.000149335	0.0078766	2.64196	exp:con	1.22e-07	HMDB0141803	6-{3-[(E)-2-(3,4-dihydroxyphenyl)ethenyl]-4,5-dihydroxyphenoxy}-3,4,5-trihydroxyoxane-2-carboxylic acid	n/a	C20H20O11	436.101	M-H20-H	-	417.082	3	n/a
M417T137	11.364	2.64e-06	0.0021645	0.000149335	0.0078766	2.64196	exp:con	1.22e-07	HMDB0141802	3,4,5-trihydroxy-6-{2-hydroxy-5-[(E)-2-(2,3,5-trihydroxyphenyl)ethenyl]phenoxy}oxane-2-carboxylic acid	n/a	C20H20O11	436.101	M-H20-H	-	417.082	3	n/a
M417T137	11.364	2.64e-06	0.0021645	0.000149335	0.0078766	2.64196	exp:con	1.22e-07	HMDB0141800	6-{3-[(E)-2-(3,4-dihydroxyphenyl)ethenyl]-2,5-dihydroxyphenoxy}-3,4,5-trihydroxyoxane-2-carboxylic acid	n/a	C20H20O11	436.101	M-H20-H	-	417.082	3	n/a
M417T137	11.364	2.64e-06	0.0021645	0.000149335	0.0078766	2.64196	exp:con	1.22e-07	HMDB0141801	3,4,5-trihydroxy-6-{2-hydroxy-4-[(E)-2-(2,3,5-trihydroxyphenyl)ethenyl]phenoxy}oxane-2-carboxylic acid	n/a	C20H20O11	436.101	M-H20-H	-	417.082	3	n/a
M417T137	11.364	2.64e-06	0.0021645	0.000149335	0.0078766	2.64196	exp:con	1.22e-07	HMDB0141796	3,4,5-trihydroxy-6-{2-hydroxy-5-[(E)-2-(3,4,5-trihydroxyphenyl)ethenyl]phenoxy}oxane-2-carboxylic acid	n/a	C20H20O11	436.101	M-H20-H	-	417.082	3	n/a
M417T137	11.364	2.64e-06	0.0021645	0.000149335	0.0078766	2.64196	exp:con	1.22e-07	HMDB0141799	6-{2-[(E)-2-(3,4-dihydroxyphenyl)ethenyl]-4,6-dihydroxyphenoxy}-3,4,5-trihydroxyoxane-2-carboxylic acid	n/a	C20H20O11	436.101	M-H20-H	-	417.082	3	n/a
M417T137	11.364	2.64e-06	0.0021645	0.000149335	0.0078766	2.64196	exp:con	1.22e-07	HMDB0141794	6-{5-[(E)-2-(3,4-dihydroxyphenyl)ethenyl]-2,3-dihydroxyphenoxy}-3,4,5-trihydroxyoxane-2-carboxylic acid	n/a	C20H20O11	436.101	M-H20-H	-	417.082	3	n/a
M417T137	11.364	2.64e-06	0.0021645	0.000149335	0.0078766	2.64196	exp:con	1.22e-07	HMDB0141795	3,4,5-trihydroxy-6-{2-hydroxy-4-[(E)-2-(3,4,5-trihydroxyphenyl)ethenyl]phenoxy}oxane-2-carboxylic acid	n/a	C20H20O11	436.101	M-H20-H	-	417.082	3	n/a
M417T137	11.364	2.64e-06	0.0021645	0.000149335	0.0078766	2.64196	exp:con	1.22e-07	HMDB0141793	6-{4-[(E)-2-(3,4-dihydroxyphenyl)ethenyl]-2,6-dihydroxyphenoxy}-3,4,5-trihydroxyoxane-2-carboxylic acid	n/a	C20H20O11	436.101	M-H20-H	-	417.082	3	n/a
M417T137	11.364	2.64e-06	0.0021645	0.000149335	0.0078766	2.64196	exp:con	1.22e-07	HMDB0140357	6'-[(E)-2-(2H-1,3-benzodioxol-5-yl)ethenyl]-3,4,5-trihydroxy-2',4'-dioxo-[2,3'-bioxane]-6-carboxylic acid	n/a	C20H20O11	436.101	M-H20-H	-	417.082	3	n/a
M417T137	11.364	2.64e-06	0.0021645	0.000149335	0.0078766	2.64196	exp:con	1.22e-07	HMDB0136984	3,4,5-trihydroxy-6-{5-[(E)-2-(4-hydroxy-2-oxo-2H-pyran-6-yl)ethenyl]-2-methoxyphenoxy}oxane-2-carboxylic acid	n/a	C20H20O11	436.101	M-H20-H	-	417.082	3	n/a
M417T137	11.364	2.64e-06	0.0021645	0.000149335	0.0078766	2.64196	exp:con	1.22e-07	HMDB0136985	3,4,5-trihydroxy-6-({6-[(E)-2-(3-hydroxy-4-methoxyphenyl)ethenyl]-2-oxo-2H-pyran-4-yl}oxy)oxane-2-carboxylic acid	n/a	C20H20O11	436.101	M-H20-H	-	417.082	3	n/a
M417T137	11.364	2.64e-06	0.0021645	0.000149335	0.0078766	2.64196	exp:con	1.22e-07	HMDB0131208	3,4,5-trihydroxy-6-{4-[(E)-2-(4-hydroxy-2-oxo-2H-pyran-6-yl)ethenyl]-2-methoxyphenoxy}oxane-2-carboxylic acid	n/a	C20H20O11	436.101	M-H20-H	-	417.082	3	n/a
M417T137	11.364	2.64e-06	0.0021645	0.000149335	0.0078766	2.64196	exp:con	1.22e-07	HMDB0141806	6-{5-[(E)-2-(3,5-dihydroxyphenyl)ethenyl]-2,3-dihydroxyphenoxy}-3,4,5-trihydroxyoxane-2-carboxylic acid	n/a	C20H20O11	436.101	M-H20-H	-	417.082	3	n/a
M417T137	11.364	2.64e-06	0.0021645	0.000149335	0.0078766	2.64196	exp:con	1.22e-07	HMDB0141810	6-{6-[(E)-2-(3,5-dihydroxyphenyl)ethenyl]-2,3-dihydroxyphenoxy}-3,4,5-trihydroxyoxane-2-carboxylic acid	n/a	C20H20O11	436.101	M-H20-H	-	417.082	3	n/a
M417T137	11.364	2.64e-06	0.0021645	0.000149335	0.0078766	2.64196	exp:con	1.22e-07	HMDB0154216	2-(3,4-dihydroxyphenyl)-5,7-dihydroxy-6-[(3,4,5-trihydroxyoxan-2-yl)oxy]-3,4-dihydro-2H-1-benzopyran-4-one	n/a	C20H20O11	436.101	M-H20-H	-	417.082	3	n/a
M417T137	11.364	2.64e-06	0.0021645	0.000149335	0.0078766	2.64196	exp:con	1.22e-07	HMDB0154218	3-(3,4-dihydroxyphenyl)-1-{2,4,6-trihydroxy-3-[(3,4,5-trihydroxyoxan-2-yl)oxy]phenyl}prop-2-en-1-one	n/a	C20H20O11	436.101	M-H20-H	-	417.082	3	n/a
M417T137	11.364	2.64e-06	0.0021645	0.000149335	0.0078766	2.64196	exp:con	1.22e-07	HMDB0146196	3,4,5-trihydroxy-6-({2-methyl-4,8-dioxo-2H,3H,4H,8H-pyrano[3,2-g]chromen-2-yl}methoxy)oxane-2-carboxylic acid	n/a	C20H20O11	436.101	M-H20-H	-	417.082	3	n/a
M417T137	11.364	2.64e-06	0.0021645	0.000149335	0.0078766	2.64196	exp:con	1.22e-07	HMDB0146194	6-({2,2-dimethyl-4,8-dioxo-2H,3H,4H,8H-pyrano[3,2-g]chromen-3-yl}oxy)-3,4,5-trihydroxyoxane-2-carboxylic acid	n/a	C20H20O11	436.101	M-H20-H	-	417.082	3	n/a
M417T137	11.364	2.64e-06	0.0021645	0.000149335	0.0078766	2.64196	exp:con	1.22e-07	HMDB0141825	6-{5-[(E)-2-(3,5-dihydroxyphenyl)ethenyl]-2,4-dihydroxyphenoxy}-3,4,5-trihydroxyoxane-2-carboxylic acid	n/a	C20H20O11	436.101	M-H20-H	-	417.082	3	n/a
M417T137	11.364	2.64e-06	0.0021645	0.000149335	0.0078766	2.64196	exp:con	1.22e-07	HMDB0141824	6-{4-[(E)-2-(3,5-dihydroxyphenyl)ethenyl]-2,5-dihydroxyphenoxy}-3,4,5-trihydroxyoxane-2-carboxylic acid	n/a	C20H20O11	436.101	M-H20-H	-	417.082	3	n/a
M417T137	11.364	2.64e-06	0.0021645	0.000149335	0.0078766	2.64196	exp:con	1.22e-07	HMDB0141823	3,4,5-trihydroxy-6-{3-hydroxy-5-[(E)-2-(2,4,5-trihydroxyphenyl)ethenyl]phenoxy}oxane-2-carboxylic acid	n/a	C20H20O11	436.101	M-H20-H	-	417.082	3	n/a
M417T137	11.364	2.64e-06	0.0021645	0.000149335	0.0078766	2.64196	exp:con	1.22e-07	HMDB0141822	6-{2-[(E)-2-(3,5-dihydroxyphenyl)ethenyl]-4,5-dihydroxyphenoxy}-3,4,5-trihydroxyoxane-2-carboxylic acid	n/a	C20H20O11	436.101	M-H20-H	-	417.082	3	n/a
M417T137	11.364	2.64e-06	0.0021645	0.000149335	0.0078766	2.64196	exp:con	1.22e-07	HMDB0141816	6-{4-[3-(3,5-dihydroxyphenyl)oxiran-2-yl]-2-hydroxyphenoxy}-3,4,5-trihydroxyoxane-2-carboxylic acid	n/a	C20H20O11	436.101	M-H20-H	-	417.082	3	n/a
M417T137	11.364	2.64e-06	0.0021645	0.000149335	0.0078766	2.64196	exp:con	1.22e-07	HMDB0141817	6-{5-[3-(3,5-dihydroxyphenyl)oxiran-2-yl]-2-hydroxyphenoxy}-3,4,5-trihydroxyoxane-2-carboxylic acid	n/a	C20H20O11	436.101	M-H20-H	-	417.082	3	n/a
M417T137	11.364	2.64e-06	0.0021645	0.000149335	0.0078766	2.64196	exp:con	1.22e-07	HMDB0141813	6-{3-[(E)-2-(3,5-dihydroxyphenyl)ethenyl]-2,6-dihydroxyphenoxy}-3,4,5-trihydroxyoxane-2-carboxylic acid	n/a	C20H20O11	436.101	M-H20-H	-	417.082	3	n/a
M417T137	11.364	2.64e-06	0.0021645	0.000149335	0.0078766	2.64196	exp:con	1.22e-07	HMDB0141815	6-{3-[3-(3,4-dihydroxyphenyl)oxiran-2-yl]-5-hydroxyphenoxy}-3,4,5-trihydroxyoxane-2-carboxylic acid	n/a	C20H20O11	436.101	M-H20-H	-	417.082	3	n/a
M417T137	11.364	2.64e-06	0.0021645	0.000149335	0.0078766	2.64196	exp:con	1.22e-07	HMDB0141812	6-{4-[(E)-2-(3,5-dihydroxyphenyl)ethenyl]-2,3-dihydroxyphenoxy}-3,4,5-trihydroxyoxane-2-carboxylic acid	n/a	C20H20O11	436.101	M-H20-H	-	417.082	3	n/a
M417T137	11.364	2.64e-06	0.0021645	0.000149335	0.0078766	2.64196	exp:con	1.22e-07	HMDB0141811	3,4,5-trihydroxy-6-{3-hydroxy-5-[(E)-2-(2,3,4-trihydroxyphenyl)ethenyl]phenoxy}oxane-2-carboxylic acid	n/a	C20H20O11	436.101	M-H20-H	-	417.082	3	n/a
M417T137	11.364	2.64e-06	0.0021645	0.000149335	0.0078766	2.64196	exp:con	1.22e-07	HMDB0141808	6-{4-[(E)-2-(3,5-dihydroxyphenyl)ethenyl]-2,6-dihydroxyphenoxy}-3,4,5-trihydroxyoxane-2-carboxylic acid	n/a	C20H20O11	436.101	M-H20-H	-	417.082	3	n/a
M417T137	11.364	2.64e-06	0.0021645	0.000149335	0.0078766	2.64196	exp:con	1.22e-07	HMDB0131209	3,4,5-trihydroxy-6-({6-[(E)-2-(4-hydroxy-3-methoxyphenyl)ethenyl]-2-oxo-2H-pyran-4-yl}oxy)oxane-2-carboxylic acid	n/a	C20H20O11	436.101	M-H20-H	-	417.082	3	n/a
M417T137	11.364	2.64e-06	0.0021645	0.000149335	0.0078766	2.64196	exp:con	1.22e-07	HMDB0131205	3,4,5-trihydroxy-6-{2-hydroxy-4-[(E)-2-(4-methoxy-2-oxo-2H-pyran-6-yl)ethenyl]phenoxy}oxane-2-carboxylic acid	n/a	C20H20O11	436.101	M-H20-H	-	417.082	3	n/a
M417T137	11.364	2.64e-06	0.0021645	0.000149335	0.0078766	2.64196	exp:con	1.22e-07	HMDB0131206	3,4,5-trihydroxy-6-{2-hydroxy-5-[(E)-2-(4-methoxy-2-oxo-2H-pyran-6-yl)ethenyl]phenoxy}oxane-2-carboxylic acid	n/a	C20H20O11	436.101	M-H20-H	-	417.082	3	n/a
M417T137	11.364	2.64e-06	0.0021645	0.000149335	0.0078766	2.64196	exp:con	1.22e-07	HMDB0041147	Isochinomin	n/a	C20H20O11	436.101	M-H20-H	-	417.082	3	n/a
M417T137	11.364	2.64e-06	0.0021645	0.000149335	0.0078766	2.64196	exp:con	1.22e-07	HMDB0132721	3-{[3,4-dihydroxy-5-(hydroxymethyl)oxolan-2-yl]oxy}-2-(3,4-dihydroxyphenyl)-5,7-dihydroxy-3,4-dihydro-2H-1-benzopyran-4-one	n/a	C20H20O11	436.101	M-H20-H	-	417.082	3	n/a
M417T137	11.364	2.64e-06	0.0021645	0.000149335	0.0078766	2.64196	exp:con	1.22e-07	HMDB0041258	Homomangiferin	n/a	C20H20O11	436.101	M-H20-H	-	417.082	3	n/a
M417T137	11.364	2.64e-06	0.0021645	0.000149335	0.0078766	2.64196	exp:con	1.22e-07	HMDB0152346	Taxifolin 3-xyloside	n/a	C20H20O11	436.101	M-H20-H	-	417.082	3	n/a
M417T137	11.364	2.64e-06	0.0021645	0.000149335	0.0078766	2.64196	exp:con	1.22e-07	HMDB0041418	Taxifolin 3-arabinoside	n/a	C20H20O11	436.101	M-H20-H	-	417.082	3	n/a
M417T137	11.364	2.64e-06	0.0021645	0.000149335	0.0078766	2.64196	exp:con	1.22e-07	HMDB0128971	3,4,5-trihydroxy-6-{[4-(7-methoxy-2-oxo-2H-chromen-6-yl)-2-oxobut-3-en-1-yl]oxy}oxane-2-carboxylic acid	n/a	C20H20O11	436.101	M-H20-H	-	417.082	3	n/a
M417T137	11.364	2.64e-06	0.0021645	0.000149335	0.0078766	2.64196	exp:con	1.22e-07	HMDB0128970	3,4,5-trihydroxy-6-{[7-methoxy-2-oxo-6-(3-oxobut-1-en-1-yl)-2H-chromen-5-yl]oxy}oxane-2-carboxylic acid	n/a	C20H20O11	436.101	M-H20-H	-	417.082	3	n/a
M417T137	11.364	2.64e-06	0.0021645	0.000149335	0.0078766	2.64196	exp:con	1.22e-07	HMDB0128969	3,4,5-trihydroxy-6-{[7-methoxy-2-oxo-6-(3-oxobut-1-en-1-yl)-2H-chromen-8-yl]oxy}oxane-2-carboxylic acid	n/a	C20H20O11	436.101	M-H20-H	-	417.082	3	n/a
M455T134	4.62388	6.19e-06	0.0021645	0.000231517	0.0078766	1.58338	exp:con	7.34e-08	HMDB0167790	2-amino-4-({1-[(carboxymethyl)-C-hydroxycarbonimidoyl]-2-[(3,5-dihydroxy-1-oxo-3a,4,5,6,7,7a-hexahydro-1H-isoindol-6-yl)sulfanyl]ethyl}-C-hydroxycarbonimidoyl)butanoic acid	n/a	C18H26N4O9S	474.142	M-H20-H	-	455.124	3	n/a
M456T68	2.60534	0.00692666	0.025974	0.0212868	0.0560999	1.04483	exp:con	7.22e-09	HMDB0155342	3,4,5-trihydroxy-6-({4-hydroxy-5-[6-hydroxy-2-(hydroxyamino)-9H-purin-9-yl]-2-(hydroxymethyl)oxolan-3-yl}oxy)oxane-2-carboxylic acid	n/a	C16H21N5O12	475.119	M-H20-H	-	456.1	1	n/a
M456T68	2.60534	0.00692666	0.025974	0.0212868	0.0560999	1.04483	exp:con	7.22e-09	HMDB0155341	3,4,5-trihydroxy-6-({4-hydroxy-2-[6-hydroxy-2-(hydroxyamino)-9H-purin-9-yl]-5-(hydroxymethyl)oxolan-3-yl}oxy)oxane-2-carboxylic acid	n/a	C16H21N5O12	475.119	M-H20-H	-	456.1	1	n/a
M456T68	2.60534	0.00692666	0.025974	0.0212868	0.0560999	1.04483	exp:con	7.22e-09	HMDB0155343	6-({3,4-dihydroxy-5-[6-hydroxy-2-(hydroxyamino)-9H-purin-9-yl]oxolan-2-yl}methoxy)-3,4,5-trihydroxyoxane-2-carboxylic acid	n/a	C16H21N5O12	475.119	M-H20-H	-	456.1	1	n/a
M456T68	2.60534	0.00692666	0.025974	0.0212868	0.0560999	1.04483	exp:con	7.22e-09	HMDB0187543	3,4,5-trihydroxy-6-({6-hydroxy-9-[4-hydroxy-5-(hydroxymethyl)oxolan-2-yl]-2-(hydroxyamino)-9H-purin-8-yl}oxy)oxane-2-carboxylic acid	n/a	C16H21N5O12	475.119	M-H20-H	-	456.1	1	n/a
M607T70_2	0.459563	0.00170131	0.0021645	0.00772139	0.0078766	1.14664	exp:con	0.00457752	HMDB0182948	6-{4-chloro-2-[({3-formyl-2a,4a-dihydroxy-6,6,7b-trimethyl-1H,2H,2aH,4aH,5H,6H,7H,7aH,7bH-cyclobuta[e]inden-2-yl}oxy)carbonyl]-5-hydroxy-3-methylphenoxy}-3,4,5-trihydroxyoxane-2-carboxylic acid	n/a	C29H35ClO13	626.177	M-H20-H	-	607.158	6	n/a
M607T70_2	0.459563	0.00170131	0.0021645	0.00772139	0.0078766	1.14664	exp:con	0.00457752	HMDB0182943	6-{4-chloro-2-[({3-formyl-2a,7-dihydroxy-6,6,7b-trimethyl-1H,2H,2aH,4aH,5H,6H,7H,7aH,7bH-cyclobuta[e]inden-2-yl}oxy)carbonyl]-5-hydroxy-3-methylphenoxy}-3,4,5-trihydroxyoxane-2-carboxylic acid	n/a	C29H35ClO13	626.177	M-H20-H	-	607.158	6	n/a
M607T70_2	0.459563	0.00170131	0.0021645	0.00772139	0.0078766	1.14664	exp:con	0.00457752	HMDB0182942	6-{2-chloro-4-[({3-formyl-2a,7-dihydroxy-6,6,7b-trimethyl-1H,2H,2aH,4aH,5H,6H,7H,7aH,7bH-cyclobuta[e]inden-2-yl}oxy)carbonyl]-5-hydroxy-3-methylphenoxy}-3,4,5-trihydroxyoxane-2-carboxylic acid	n/a	C29H35ClO13	626.177	M-H20-H	-	607.158	6	n/a
M607T70_2	0.459563	0.00170131	0.0021645	0.00772139	0.0078766	1.14664	exp:con	0.00457752	HMDB0182940	6-{4-chloro-2-[({3-formyl-2a,5-dihydroxy-6,6,7b-trimethyl-1H,2H,2aH,4aH,5H,6H,7H,7aH,7bH-cyclobuta[e]inden-2-yl}oxy)carbonyl]-5-hydroxy-3-methylphenoxy}-3,4,5-trihydroxyoxane-2-carboxylic acid	n/a	C29H35ClO13	626.177	M-H20-H	-	607.158	6	n/a
M607T70_2	0.459563	0.00170131	0.0021645	0.00772139	0.0078766	1.14664	exp:con	0.00457752	HMDB0182945	6-{2-chloro-4-[({4-formyl-5-hydroxy-8,11,11-trimethyl-3-oxatetracyclo[7.3.0.0²,⁴.0⁵,⁸]dodecan-6-yl}oxy)carbonyl]-5-hydroxy-3-methylphenoxy}-3,4,5-trihydroxyoxane-2-carboxylic acid	n/a	C29H35ClO13	626.177	M-H20-H	-	607.158	6	n/a
M607T70_2	0.459563	0.00170131	0.0021645	0.00772139	0.0078766	1.14664	exp:con	0.00457752	HMDB0182947	6-{2-chloro-4-[({3-formyl-2a,4a-dihydroxy-6,6,7b-trimethyl-1H,2H,2aH,4aH,5H,6H,7H,7aH,7bH-cyclobuta[e]inden-2-yl}oxy)carbonyl]-5-hydroxy-3-methylphenoxy}-3,4,5-trihydroxyoxane-2-carboxylic acid	n/a	C29H35ClO13	626.177	M-H20-H	-	607.158	6	n/a
M607T70_2	0.459563	0.00170131	0.0021645	0.00772139	0.0078766	1.14664	exp:con	0.00457752	HMDB0182946	6-{4-chloro-2-[({4-formyl-5-hydroxy-8,11,11-trimethyl-3-oxatetracyclo[7.3.0.0²,⁴.0⁵,⁸]dodecan-6-yl}oxy)carbonyl]-5-hydroxy-3-methylphenoxy}-3,4,5-trihydroxyoxane-2-carboxylic acid	n/a	C29H35ClO13	626.177	M-H20-H	-	607.158	6	n/a
M607T70_2	0.459563	0.00170131	0.0021645	0.00772139	0.0078766	1.14664	exp:con	0.00457752	HMDB0182950	6-{4-chloro-2-[({3-formyl-2a,7a-dihydroxy-6,6,7b-trimethyl-1H,2H,2aH,4aH,5H,6H,7H,7aH,7bH-cyclobuta[e]inden-2-yl}oxy)carbonyl]-5-hydroxy-3-methylphenoxy}-3,4,5-trihydroxyoxane-2-carboxylic acid	n/a	C29H35ClO13	626.177	M-H20-H	-	607.158	6	n/a
M607T70_2	0.459563	0.00170131	0.0021645	0.00772139	0.0078766	1.14664	exp:con	0.00457752	HMDB0182949	6-{2-chloro-4-[({3-formyl-2a,7a-dihydroxy-6,6,7b-trimethyl-1H,2H,2aH,4aH,5H,6H,7H,7aH,7bH-cyclobuta[e]inden-2-yl}oxy)carbonyl]-5-hydroxy-3-methylphenoxy}-3,4,5-trihydroxyoxane-2-carboxylic acid	n/a	C29H35ClO13	626.177	M-H20-H	-	607.158	6	n/a
M607T70_2	0.459563	0.00170131	0.0021645	0.00772139	0.0078766	1.14664	exp:con	0.00457752	HMDB0182939	6-{2-chloro-4-[({3-formyl-2a,5-dihydroxy-6,6,7b-trimethyl-1H,2H,2aH,4aH,5H,6H,7H,7aH,7bH-cyclobuta[e]inden-2-yl}oxy)carbonyl]-5-hydroxy-3-methylphenoxy}-3,4,5-trihydroxyoxane-2-carboxylic acid	n/a	C29H35ClO13	626.177	M-H20-H	-	607.158	6	n/a
M607T70_2	0.459563	0.00170131	0.0021645	0.00772139	0.0078766	1.14664	exp:con	0.00457752	HMDB0182936	6-{2-chloro-4-[({3-formyl-2a-hydroxy-6,6,7b-trimethyl-1H,2H,2aH,4aH,5H,6H,7H,7aH,7bH-cyclobuta[e]inden-2-yl}oxy)carbonyl]-5-hydroxy-3-(hydroxymethyl)phenoxy}-3,4,5-trihydroxyoxane-2-carboxylic acid	n/a	C29H35ClO13	626.177	M-H20-H	-	607.158	6	n/a
M607T70_2	0.459563	0.00170131	0.0021645	0.00772139	0.0078766	1.14664	exp:con	0.00457752	HMDB0182937	6-{4-chloro-2-[({3-formyl-2a-hydroxy-6,6,7b-trimethyl-1H,2H,2aH,4aH,5H,6H,7H,7aH,7bH-cyclobuta[e]inden-2-yl}oxy)carbonyl]-5-hydroxy-3-(hydroxymethyl)phenoxy}-3,4,5-trihydroxyoxane-2-carboxylic acid	n/a	C29H35ClO13	626.177	M-H20-H	-	607.158	6	n/a
M607T70_2	0.459563	0.00170131	0.0021645	0.00772139	0.0078766	1.14664	exp:con	0.00457752	HMDB0182927	6-[2-chloro-4-({[3-formyl-2a-hydroxy-6-(hydroxymethyl)-6,7b-dimethyl-1H,2H,2aH,4aH,5H,6H,7H,7aH,7bH-cyclobuta[e]inden-2-yl]oxy}carbonyl)-5-hydroxy-3-methylphenoxy]-3,4,5-trihydroxyoxane-2-carboxylic acid	n/a	C29H35ClO13	626.177	M-H20-H	-	607.158	6	n/a
M607T70_2	0.459563	0.00170131	0.0021645	0.00772139	0.0078766	1.14664	exp:con	0.00457752	HMDB0182930	6-[2-chloro-4-({[3-formyl-2a-hydroxy-7b-(hydroxymethyl)-6,6-dimethyl-1H,2H,2aH,4aH,5H,6H,7H,7aH,7bH-cyclobuta[e]inden-2-yl]oxy}carbonyl)-5-hydroxy-3-methylphenoxy]-3,4,5-trihydroxyoxane-2-carboxylic acid	n/a	C29H35ClO13	626.177	M-H20-H	-	607.158	6	n/a
M607T70_2	0.459563	0.00170131	0.0021645	0.00772139	0.0078766	1.14664	exp:con	0.00457752	HMDB0182931	6-[4-chloro-2-({[3-formyl-2a-hydroxy-7b-(hydroxymethyl)-6,6-dimethyl-1H,2H,2aH,4aH,5H,6H,7H,7aH,7bH-cyclobuta[e]inden-2-yl]oxy}carbonyl)-5-hydroxy-3-methylphenoxy]-3,4,5-trihydroxyoxane-2-carboxylic acid	n/a	C29H35ClO13	626.177	M-H20-H	-	607.158	6	n/a
M607T70_2	0.459563	0.00170131	0.0021645	0.00772139	0.0078766	1.14664	exp:con	0.00457752	HMDB0182928	6-[4-chloro-2-({[3-formyl-2a-hydroxy-6-(hydroxymethyl)-6,7b-dimethyl-1H,2H,2aH,4aH,5H,6H,7H,7aH,7bH-cyclobuta[e]inden-2-yl]oxy}carbonyl)-5-hydroxy-3-methylphenoxy]-3,4,5-trihydroxyoxane-2-carboxylic acid	n/a	C29H35ClO13	626.177	M-H20-H	-	607.158	6	n/a
M607T70_2	0.459563	0.00170131	0.0021645	0.00772139	0.0078766	1.14664	exp:con	0.00457752	HMDB0182935	6-{4-chloro-2-[({3-formyl-2a-hydroxy-6,6,7b-trimethyl-1H,2H,2aH,4aH,5H,6H,7H,7aH,7bH-cyclobuta[e]inden-2-yl}oxy)carbonyl]-5,6-dihydroxy-3-methylphenoxy}-3,4,5-trihydroxyoxane-2-carboxylic acid	n/a	C29H35ClO13	626.177	M-H20-H	-	607.158	6	n/a
M607T70_2	0.459563	0.00170131	0.0021645	0.00772139	0.0078766	1.14664	exp:con	0.00457752	HMDB0182933	6-{3-chloro-5-[({3-formyl-2a-hydroxy-6,6,7b-trimethyl-1H,2H,2aH,4aH,5H,6H,7H,7aH,7bH-cyclobuta[e]inden-2-yl}oxy)carbonyl]-2,6-dihydroxy-4-methylphenoxy}-3,4,5-trihydroxyoxane-2-carboxylic acid	n/a	C29H35ClO13	626.177	M-H20-H	-	607.158	6	n/a
M607T70_2	0.459563	0.00170131	0.0021645	0.00772139	0.0078766	1.14664	exp:con	0.00457752	HMDB0182934	6-{2-chloro-4-[({3-formyl-2a-hydroxy-6,6,7b-trimethyl-1H,2H,2aH,4aH,5H,6H,7H,7aH,7bH-cyclobuta[e]inden-2-yl}oxy)carbonyl]-5,6-dihydroxy-3-methylphenoxy}-3,4,5-trihydroxyoxane-2-carboxylic acid	n/a	C29H35ClO13	626.177	M-H20-H	-	607.158	6	n/a
M607T70_2	0.459563	0.00170131	0.0021645	0.00772139	0.0078766	1.14664	exp:con	0.00457752	HMDB0030121	Kuwanon L	n/a	C35H30O11	626.179	M-H20-H	-	607.16	9	n/a
M619T102	0.476752	0.0010645	0.004329	0.00555965	0.0134018	1.14495	exp:con	0.142243	HMDB0134863	12-{4-[(6-carboxy-3,4,5-trihydroxyoxan-2-yl)oxy]phenyl}-3,8-dihydroxy-7-(4-hydroxy-3,5-dimethoxyphenyl)-6λ⁴,11,13-trioxatetracyclo[7.4.1.0⁵,¹⁴.0¹⁰,¹²]tetradeca-1,3,5(14),6,8-pentaen-6-ylium	n/a	C31H27O15	639.134	M-H20-H	-	619.109	8	n/a
M619T102	0.476752	0.0010645	0.004329	0.00555965	0.0134018	1.14495	exp:con	0.142243	HMDB0134861	8-[(6-carboxy-3,4,5-trihydroxyoxan-2-yl)oxy]-3-hydroxy-7-(4-hydroxy-3,5-dimethoxyphenyl)-12-(4-hydroxyphenyl)-6λ⁴,11,13-trioxatetracyclo[7.4.1.0⁵,¹⁴.0¹⁰,¹²]tetradeca-1,3,5(14),6,8-pentaen-6-ylium	n/a	C31H27O15	639.134	M-H20-H	-	619.109	8	n/a
M619T102	0.476752	0.0010645	0.004329	0.00555965	0.0134018	1.14495	exp:con	0.142243	HMDB0134862	3-[(6-carboxy-3,4,5-trihydroxyoxan-2-yl)oxy]-8-hydroxy-7-(4-hydroxy-3,5-dimethoxyphenyl)-12-(4-hydroxyphenyl)-6λ⁴,11,13-trioxatetracyclo[7.4.1.0⁵,¹⁴.0¹⁰,¹²]tetradeca-1,3,5(14),6,8-pentaen-6-ylium	n/a	C31H27O15	639.134	M-H20-H	-	619.109	8	n/a
M619T102	0.476752	0.0010645	0.004329	0.00555965	0.0134018	1.14495	exp:con	0.142243	HMDB0134855	6-[(6-carboxy-3,4,5-trihydroxyoxan-2-yl)oxy]-3-(3,4-dihydroxyphenyl)-11-hydroxy-7-(4-hydroxy-3,5-dimethoxyphenyl)-2λ⁴,8-dioxatricyclo[7.3.1.0⁵,¹³]trideca-1(13),2,4,6,9,11-hexaen-2-ylium	n/a	C31H27O15	639.134	M-H20-H	-	619.109	8	n/a
M619T102	0.476752	0.0010645	0.004329	0.00555965	0.0134018	1.14495	exp:con	0.142243	HMDB0134857	3-{4-[(6-carboxy-3,4,5-trihydroxyoxan-2-yl)oxy]-3-hydroxyphenyl}-6,11-dihydroxy-7-(4-hydroxy-3,5-dimethoxyphenyl)-2λ⁴,8-dioxatricyclo[7.3.1.0⁵,¹³]trideca-1(13),2,4,6,9,11-hexaen-2-ylium	n/a	C31H27O15	639.134	M-H20-H	-	619.109	8	n/a
M619T102	0.476752	0.0010645	0.004329	0.00555965	0.0134018	1.14495	exp:con	0.142243	HMDB0134856	11-[(6-carboxy-3,4,5-trihydroxyoxan-2-yl)oxy]-3-(3,4-dihydroxyphenyl)-6-hydroxy-7-(4-hydroxy-3,5-dimethoxyphenyl)-2λ⁴,8-dioxatricyclo[7.3.1.0⁵,¹³]trideca-1(13),2,4,6,9,11-hexaen-2-ylium	n/a	C31H27O15	639.134	M-H20-H	-	619.109	8	n/a
M619T102	0.476752	0.0010645	0.004329	0.00555965	0.0134018	1.14495	exp:con	0.142243	HMDB0134858	7-{4-[(6-carboxy-3,4,5-trihydroxyoxan-2-yl)oxy]-3,5-dimethoxyphenyl}-3-(3,4-dihydroxyphenyl)-6,11-dihydroxy-2λ⁴,8-dioxatricyclo[7.3.1.0⁵,¹³]trideca-1(13),2,4,6,9,11-hexaen-2-ylium	n/a	C31H27O15	639.134	M-H20-H	-	619.109	8	n/a
M619T102	0.476752	0.0010645	0.004329	0.00555965	0.0134018	1.14495	exp:con	0.142243	HMDB0134854	3-{3-[(6-carboxy-3,4,5-trihydroxyoxan-2-yl)oxy]-4-hydroxyphenyl}-6,11-dihydroxy-7-(4-hydroxy-3,5-dimethoxyphenyl)-2λ⁴,8-dioxatricyclo[7.3.1.0⁵,¹³]trideca-1(13),2,4,6,9,11-hexaen-2-ylium	n/a	C31H27O15	639.134	M-H20-H	-	619.109	8	n/a
M619T102	0.476752	0.0010645	0.004329	0.00555965	0.0134018	1.14495	exp:con	0.142243	HMDB0134864	7-{4-[(6-carboxy-3,4,5-trihydroxyoxan-2-yl)oxy]-3,5-dimethoxyphenyl}-3,8-dihydroxy-12-(4-hydroxyphenyl)-6λ⁴,11,13-trioxatetracyclo[7.4.1.0⁵,¹⁴.0¹⁰,¹²]tetradeca-1,3,5(14),6,8-pentaen-6-ylium	n/a	C31H27O15	639.134	M-H20-H	-	619.109	8	n/a
M681T52	0.398255	6.88e-06	0.0021645	0.000243071	0.0078766	1.46892	exp:con	0.192355	HMDB0011438	PE(P-18:1(9Z)/16:1(9Z))	n/a	C39H74NO7P	699.52	M-H20-H	-	680.502	0	n/a
M681T52	0.398255	6.88e-06	0.0021645	0.000243071	0.0078766	1.46892	exp:con	0.192355	HMDB0011405	PE(P-18:1(11Z)/16:1(9Z))	n/a	C39H74NO7P	699.52	M-H20-H	-	680.502	0	n/a
M681T52	0.398255	6.88e-06	0.0021645	0.000243071	0.0078766	1.46892	exp:con	0.192355	HMDB0011343	PE(P-16:0/18:2(9Z,12Z))	n/a	C39H74NO7P	699.52	M-H20-H	-	680.502	0	n/a
M681T52	0.398255	6.88e-06	0.0021645	0.000243071	0.0078766	1.46892	exp:con	0.192355	HMDB0009114	PE(18:2(9Z,12Z)/P-16:0)	n/a	C39H74NO7P	699.52	M-H20-H	-	680.502	0	n/a
M681T52	0.398255	6.88e-06	0.0021645	0.000243071	0.0078766	1.46892	exp:con	0.192355	HMDB0008985	PE(16:1(9Z)/P-18:1(9Z))	C00350	C39H74NO7P	699.52	M-H20-H	-	680.502	0	map00563 Glycosylphosphatidylinositol (GPI)-anchor biosynthesis;map00564 Glycerophospholipid metabolism;map01100 Metabolic pathways;map01110 Biosynthesis of secondary metabolites;map04136 Autophagy - other;map04138 Autophagy - yeast;map04140 Autophagy - animal;map04723 Retrograde endocannabinoid signaling;map05130 Pathogenic Escherichia coli infection;map05167 Kaposi's sarcoma-associated herpesvi…
M681T52	0.398255	6.88e-06	0.0021645	0.000243071	0.0078766	1.46892	exp:con	0.192355	HMDB0008984	PE(16:1(9Z)/P-18:1(11Z))	C00350	C39H74NO7P	699.52	M-H20-H	-	680.502	0	map00563 Glycosylphosphatidylinositol (GPI)-anchor biosynthesis;map00564 Glycerophospholipid metabolism;map01100 Metabolic pathways;map01110 Biosynthesis of secondary metabolites;map04136 Autophagy - other;map04138 Autophagy - yeast;map04140 Autophagy - animal;map04723 Retrograde endocannabinoid signaling;map05130 Pathogenic Escherichia coli infection;map05167 Kaposi's sarcoma-associated herpesvi…
M686T200	0.08718	0.000761258	0.0021645	0.00442276	0.0078766	1.90855	exp:con	0.118848	HMDB0143333	6-{[(2R)-4-[(4-amino-5-hydroxy-6-methyloxan-2-yl)oxy]-2,7,12-trihydroxy-2-(2-hydroxyacetyl)-6,11-dioxo-1,2,3,4,6,11-hexahydrotetracen-5-yl]oxy}-3,4,5-trihydroxyoxane-2-carboxylic acid	n/a	C32H35NO17	705.19	M-H20-H	-	686.172	10	n/a
M686T200	0.08718	0.000761258	0.0021645	0.00442276	0.0078766	1.90855	exp:con	0.118848	HMDB0143332	6-{[(3S)-1-[(4-amino-5-hydroxy-6-methyloxan-2-yl)oxy]-3,10,12-trihydroxy-3-(2-hydroxyacetyl)-6,11-dioxo-1,2,3,4,6,11-hexahydrotetracen-5-yl]oxy}-3,4,5-trihydroxyoxane-2-carboxylic acid	n/a	C32H35NO17	705.19	M-H20-H	-	686.172	10	n/a
M686T200	0.08718	0.000761258	0.0021645	0.00442276	0.0078766	1.90855	exp:con	0.118848	HMDB0143334	6-{[(8S)-10-[(4-amino-5-hydroxy-6-methyloxan-2-yl)oxy]-6,8,11-trihydroxy-8-(2-hydroxyacetyl)-5,12-dioxo-5,7,8,9,10,12-hexahydrotetracen-1-yl]oxy}-3,4,5-trihydroxyoxane-2-carboxylic acid	n/a	C32H35NO17	705.19	M-H20-H	-	686.172	10	n/a
M788T69	0.446511	0.00654941	0.0021645	0.020477	0.0078766	1.12575	exp:con	0.123869	HMDB0015378	Docetaxel	C11231	C43H53NO14	807.347	M-H20-H	-	788.328	4	map04976 Bile secretion;
M788T69	0.446511	0.00654941	0.0021645	0.020477	0.0078766	1.12575	exp:con	0.123869	HMDB0042023	(1S,2S,4S,7R,9S,10S,12R,15S)-4-(acetyloxy)-15-{[(2R,3S)-3-{[(tert-butoxy)(hydroxy)methylidene]amino}-2-hydroxy-3-phenylpropanoyl]oxy}-1,9,12-trihydroxy-10,14,17,17-tetramethyl-11-oxo-6-oxatetracyclo[11.3.1.0³,¹⁰.0⁴,⁷]heptadec-13-en-2-yl benzoate	n/a	C43H53NO14	807.347	M-H20-H	-	788.328	4	n/a
M929T199	3.96436	0.00134898	0.0021645	0.00652797	0.0078766	1.55431	exp:con	0.199764	HMDB0177168	6-(16'-{[3,4-dihydroxy-6-(hydroxymethyl)-5-{[3,4,5-trihydroxy-6-(hydroxymethyl)oxan-2-yl]oxy}oxan-2-yl]oxy}-5,7',9',13'-tetramethyl-5'-oxaspiro[oxane-2,6'-pentacyclo[10.8.0.0²,⁹.0⁴,⁸.0¹³,¹⁸]icosane]-15'-oloxy)-3,4,5-trihydroxyoxane-2-carboxylic acid	n/a	C45H72O21	948.457	M-H20-H	-	929.438	1	n/a
M89T69	2.25562	8.72e-05	0.0021645	0.00105146	0.0078766	1.11284	exp:con	7.15e-09	HMDB0062492	L-lactate	n/a	C3H5O3	89.0239	M-H	-	89.0239	7	n/a
M102T54	2.80451	0.0018437	0.004329	0.00815108	0.0134018	1.35304	exp:con	0.0521725	HMDB0161316	4-aminobutanoate	n/a	C4H8NO2	102.056	M-H	-	102.056	5	n/a
M115T100	4.88683	7.26e-05	0.0021645	0.000938875	0.0078766	1.97564	exp:con	0.106039	HMDB0000134	Fumaric acid	C00122	C4H4O4	116.011	M-H	-	115.004	9	map00020 Citrate cycle (TCA cycle);map00190 Oxidative phosphorylation;map00220 Arginine biosynthesis;map00250 Alanine, aspartate and glutamate metabolism;map00350 Tyrosine metabolism;map00360 Phenylalanine metabolism;map00620 Pyruvate metabolism;map00643 Styrene degradation;map00650 Butanoate metabolism;map00720 Carbon fixation pathways in prokaryotes;map00760 Nicotinate and nicotinamide metaboli…
M115T100	4.88683	7.26e-05	0.0021645	0.000938875	0.0078766	1.97564	exp:con	0.106039	HMDB0000176	Maleic acid	C01384	C4H4O4	116.011	M-H	-	115.004	9	map00350 Tyrosine metabolism;map00650 Butanoate metabolism;map00760 Nicotinate and nicotinamide metabolism;map01120 Microbial metabolism in diverse environments;
M115T100	4.88683	7.26e-05	0.0021645	0.000938875	0.0078766	1.97564	exp:con	0.106039	HMDB0187641	SCHEMBL12307359	n/a	C4H4O4	116.011	M-H	-	115.004	9	n/a
M115T70	4.17783	9.8e-05	0.0021645	0.00114035	0.0078766	1.88094	exp:con	0.0302063	HMDB0000134	Fumaric acid	C00122	C4H4O4	116.011	M-H	-	115.004	9	map00020 Citrate cycle (TCA cycle);map00190 Oxidative phosphorylation;map00220 Arginine biosynthesis;map00250 Alanine, aspartate and glutamate metabolism;map00350 Tyrosine metabolism;map00360 Phenylalanine metabolism;map00620 Pyruvate metabolism;map00643 Styrene degradation;map00650 Butanoate metabolism;map00720 Carbon fixation pathways in prokaryotes;map00760 Nicotinate and nicotinamide metaboli…
M115T70	4.17783	9.8e-05	0.0021645	0.00114035	0.0078766	1.88094	exp:con	0.0302063	HMDB0000176	Maleic acid	C01384	C4H4O4	116.011	M-H	-	115.004	9	map00350 Tyrosine metabolism;map00650 Butanoate metabolism;map00760 Nicotinate and nicotinamide metabolism;map01120 Microbial metabolism in diverse environments;
M115T70	4.17783	9.8e-05	0.0021645	0.00114035	0.0078766	1.88094	exp:con	0.0302063	HMDB0187641	SCHEMBL12307359	n/a	C4H4O4	116.011	M-H	-	115.004	9	n/a
M117T102	14.6522	6.43e-09	0.0021645	3.6e-06	0.0078766	2.60094	exp:con	0.0180915	HMDB0000254	Succinic acid	C00042	C4H6O4	118.027	M-H	-	117.019	9	map00020 Citrate cycle (TCA cycle);map00190 Oxidative phosphorylation;map00250 Alanine, aspartate and glutamate metabolism;map00350 Tyrosine metabolism;map00360 Phenylalanine metabolism;map00361 Chlorocyclohexane and chlorobenzene degradation;map00620 Pyruvate metabolism;map00630 Glyoxylate and dicarboxylate metabolism;map00640 Propanoate metabolism;map00650 Butanoate metabolism;map00720 Carbon f…
M117T102	14.6522	6.43e-09	0.0021645	3.6e-06	0.0078766	2.60094	exp:con	0.0180915	HMDB0157670	2-hydroxy-4-oxobutanoic acid	n/a	C4H6O4	118.027	M-H	-	117.019	9	n/a
M117T102	14.6522	6.43e-09	0.0021645	3.6e-06	0.0078766	2.60094	exp:con	0.0180915	HMDB0130020	3-methoxy-3-oxopropanoic acid	n/a	C4H6O4	118.027	M-H	-	117.019	9	n/a
M117T102	14.6522	6.43e-09	0.0021645	3.6e-06	0.0078766	2.60094	exp:con	0.0180915	HMDB0031204	4-Hydroxy-2-oxobutanoic acid	n/a	C4H6O4	118.027	M-H	-	117.019	9	n/a
M117T102	14.6522	6.43e-09	0.0021645	3.6e-06	0.0078766	2.60094	exp:con	0.0180915	HMDB0039324	xi-3-Hydroxy-2-oxobutanoic acid	n/a	C4H6O4	118.027	M-H	-	117.019	9	n/a
M117T102	14.6522	6.43e-09	0.0021645	3.6e-06	0.0078766	2.60094	exp:con	0.0180915	HMDB0000940	Threonolactone	n/a	C4H6O4	118.027	M-H	-	117.019	9	n/a
M117T102	14.6522	6.43e-09	0.0021645	3.6e-06	0.0078766	2.60094	exp:con	0.0180915	HMDB0000349	Erythrono-1,4-lactone	n/a	C4H6O4	118.027	M-H	-	117.019	9	n/a
M117T102	14.6522	6.43e-09	0.0021645	3.6e-06	0.0078766	2.60094	exp:con	0.0180915	HMDB0000202	Methylmalonic acid	C02170	C4H6O4	118.027	M-H	-	117.019	9	map00240 Pyrimidine metabolism;map00280 Valine, leucine and isoleucine degradation;map00640 Propanoate metabolism;
M117T102	14.6522	6.43e-09	0.0021645	3.6e-06	0.0078766	2.60094	exp:con	0.0180915	HMDB0187640	SCHEMBL7512234	n/a	C4H6O4	118.027	M-H	-	117.019	9	n/a
M147T97	3.39195	3.63e-06	0.0021645	0.000175083	0.0078766	1.53852	exp:con	7.18e-08	HMDB0000428	3-Hydroxyglutaric acid	n/a	C5H8O5	148.037	M-H	-	147.03	5	n/a
M147T97	3.39195	3.63e-06	0.0021645	0.000175083	0.0078766	1.53852	exp:con	7.18e-08	HMDB0160407	3-ethoxy-2-hydroxy-3-oxopropanoic acid	n/a	C5H8O5	148.037	M-H	-	147.03	5	n/a
M147T97	3.39195	3.63e-06	0.0021645	0.000175083	0.0078766	1.53852	exp:con	7.18e-08	HMDB0160406	SCHEMBL4192400	n/a	C5H8O5	148.037	M-H	-	147.03	5	n/a
M147T97	3.39195	3.63e-06	0.0021645	0.000175083	0.0078766	1.53852	exp:con	7.18e-08	HMDB0160667	SCHEMBL6374585	n/a	C5H8O5	148.037	M-H	-	147.03	5	n/a
M147T97	3.39195	3.63e-06	0.0021645	0.000175083	0.0078766	1.53852	exp:con	7.18e-08	HMDB0160666	SCHEMBL1124153	n/a	C5H8O5	148.037	M-H	-	147.03	5	n/a
M147T97	3.39195	3.63e-06	0.0021645	0.000175083	0.0078766	1.53852	exp:con	7.18e-08	HMDB0160668	Aethyltartronsaure	n/a	C5H8O5	148.037	M-H	-	147.03	5	n/a
M147T97	3.39195	3.63e-06	0.0021645	0.000175083	0.0078766	1.53852	exp:con	7.18e-08	HMDB0000426	Citramalic acid	C00815	C5H8O5	148.037	M-H	-	147.03	5	n/a
M147T97	3.39195	3.63e-06	0.0021645	0.000175083	0.0078766	1.53852	exp:con	7.18e-08	HMDB0000606	D-2-Hydroxyglutaric acid	C01087	C5H8O5	148.037	M-H	-	147.03	5	n/a
M147T97	3.39195	3.63e-06	0.0021645	0.000175083	0.0078766	1.53852	exp:con	7.18e-08	HMDB0001900	Ribonolactone	C02674	C5H8O5	148.037	M-H	-	147.03	5	n/a
M147T97	3.39195	3.63e-06	0.0021645	0.000175083	0.0078766	1.53852	exp:con	7.18e-08	HMDB0011676	D-Xylono-1,5-lactone	C02266	C5H8O5	148.037	M-H	-	147.03	5	map00040 Pentose and glucuronate interconversions;
M147T97	3.39195	3.63e-06	0.0021645	0.000175083	0.0078766	1.53852	exp:con	7.18e-08	HMDB0059655	2-Hydroxyglutarate	C02630	C5H8O5	148.037	M-H	-	147.03	5	map00650 Butanoate metabolism;map00660 C5-Branched dibasic acid metabolism;
M147T97	3.39195	3.63e-06	0.0021645	0.000175083	0.0078766	1.53852	exp:con	7.18e-08	HMDB0061190	3-methylmalate(2-)	n/a	C5H8O5	148.037	M-H	-	147.03	5	n/a
M147T97	3.39195	3.63e-06	0.0021645	0.000175083	0.0078766	1.53852	exp:con	7.18e-08	HMDB0062739	3-methylmalate(2-)	n/a	C5H8O5	148.037	M-H	-	147.03	5	n/a
M147T97	3.39195	3.63e-06	0.0021645	0.000175083	0.0078766	1.53852	exp:con	7.18e-08	HMDB0000694	L-2-Hydroxyglutaric acid	C03196	C5H8O5	148.037	M-H	-	147.03	5	n/a
M147T97	3.39195	3.63e-06	0.0021645	0.000175083	0.0078766	1.53852	exp:con	7.18e-08	HMDB0161319	Itamalic acid	n/a	C5H8O5	148.037	M-H	-	147.03	5	n/a
M147T134	0.440714	0.000269499	0.0021645	0.00219608	0.0078766	1.37382	exp:con	0.221339	HMDB0135275	3-phenyloxirane-2-carbaldehyde	n/a	C9H8O2	148.052	M-H	-	147.045	5	n/a
M147T134	0.440714	0.000269499	0.0021645	0.00219608	0.0078766	1.37382	exp:con	0.221339	HMDB0135648	3-(4-hydroxyphenyl)prop-2-enal	n/a	C9H8O2	148.052	M-H	-	147.045	5	n/a
M147T134	0.440714	0.000269499	0.0021645	0.00219608	0.0078766	1.37382	exp:con	0.221339	HMDB0128078	3-phenylprop-2-enoic acid	n/a	C9H8O2	148.052	M-H	-	147.045	5	n/a
M147T134	0.440714	0.000269499	0.0021645	0.00219608	0.0078766	1.37382	exp:con	0.221339	HMDB0135273	(2Z)-2-hydroxy-3-phenylprop-2-enal	n/a	C9H8O2	148.052	M-H	-	147.045	5	n/a
M147T134	0.440714	0.000269499	0.0021645	0.00219608	0.0078766	1.37382	exp:con	0.221339	HMDB0135274	(2E)-3-(3-hydroxyphenyl)prop-2-enal	n/a	C9H8O2	148.052	M-H	-	147.045	5	n/a
M147T134	0.440714	0.000269499	0.0021645	0.00219608	0.0078766	1.37382	exp:con	0.221339	HMDB0134039	3-(2-hydroxyphenyl)prop-2-enal	n/a	C9H8O2	148.052	M-H	-	147.045	5	n/a
M147T134	0.440714	0.000269499	0.0021645	0.00219608	0.0078766	1.37382	exp:con	0.221339	HMDB0000930	trans-Cinnamic acid	C10438	C9H8O2	148.052	M-H	-	147.045	5	n/a
M147T134	0.440714	0.000269499	0.0021645	0.00219608	0.0078766	1.37382	exp:con	0.221339	HMDB0040986	(E)-3-(4-Hydroxyphenyl)-2-propenal	C05608	C9H8O2	148.052	M-H	-	147.045	5	map00940 Phenylpropanoid biosynthesis;map01061 Biosynthesis of phenylpropanoids;map01100 Metabolic pathways;map01110 Biosynthesis of secondary metabolites;
M147T134	0.440714	0.000269499	0.0021645	0.00219608	0.0078766	1.37382	exp:con	0.221339	HMDB0031725	(E)-3-(2-Hydroxyphenyl)-2-propenal	n/a	C9H8O2	148.052	M-H	-	147.045	5	n/a
M147T134	0.440714	0.000269499	0.0021645	0.00219608	0.0078766	1.37382	exp:con	0.221339	HMDB0035243	1-Phenyl-1,2-propanedione	C17268	C9H8O2	148.052	M-H	-	147.045	5	map00360 Phenylalanine metabolism;map01063 Biosynthesis of alkaloids derived from shikimate pathway;map01100 Metabolic pathways;
M147T134	0.440714	0.000269499	0.0021645	0.00219608	0.0078766	1.37382	exp:con	0.221339	HMDB0032947	Di-2-furanylmethane	n/a	C9H8O2	148.052	M-H	-	147.045	5	n/a
M147T134	0.440714	0.000269499	0.0021645	0.00219608	0.0078766	1.37382	exp:con	0.221339	HMDB0036626	3,4-Dihydro-2H-1-benzopyran-2-one	C02274	C9H8O2	148.052	M-H	-	147.045	5	map00624 Polycyclic aromatic hydrocarbon degradation;map01120 Microbial metabolism in diverse environments;
M147T134	0.440714	0.000269499	0.0021645	0.00219608	0.0078766	1.37382	exp:con	0.221339	HMDB0000567	Cinnamic acid	C10438	C9H8O2	148.052	M-H	-	147.045	5	n/a
M153T139	3.60515	4.9e-06	0.0021645	0.00020601	0.0078766	1.815	exp:con	0.0538111	HMDB0125090	2,4,6-trihydroxybenzaldehyde	n/a	C7H6O4	154.027	M-H	-	153.019	7	n/a
M153T139	3.60515	4.9e-06	0.0021645	0.00020601	0.0078766	1.815	exp:con	0.0538111	HMDB0166598	21505-20-4	n/a	C7H6O4	154.027	M-H	-	153.019	7	n/a
M153T139	3.60515	4.9e-06	0.0021645	0.00020601	0.0078766	1.815	exp:con	0.0538111	HMDB0029666	2,4-Dihydroxybenzoic acid	n/a	C7H6O4	154.027	M-H	-	153.019	7	n/a
M153T139	3.60515	4.9e-06	0.0021645	0.00020601	0.0078766	1.815	exp:con	0.0538111	HMDB0001856	Protocatechuic acid	C00230	C7H6O4	154.027	M-H	-	153.019	7	map00362 Benzoate degradation;map00400 Phenylalanine, tyrosine and tryptophan biosynthesis;map00623 Toluene degradation;map00624 Polycyclic aromatic hydrocarbon degradation;map00627 Aminobenzoate degradation;map01061 Biosynthesis of phenylpropanoids;map01100 Metabolic pathways;map01110 Biosynthesis of secondary metabolites;map01120 Microbial metabolism in diverse environments;map01130 Biosynthesi…
M153T139	3.60515	4.9e-06	0.0021645	0.00020601	0.0078766	1.815	exp:con	0.0538111	HMDB0000152	Gentisic acid	C00628	C7H6O4	154.027	M-H	-	153.019	7	map00350 Tyrosine metabolism;map00362 Benzoate degradation;map00626 Naphthalene degradation;map01100 Metabolic pathways;map01120 Microbial metabolism in diverse environments;
M153T139	3.60515	4.9e-06	0.0021645	0.00020601	0.0078766	1.815	exp:con	0.0538111	HMDB0034299	Patulin	C16748	C7H6O4	154.027	M-H	-	153.019	7	n/a
M153T139	3.60515	4.9e-06	0.0021645	0.00020601	0.0078766	1.815	exp:con	0.0538111	HMDB0013677	3,5-Dihydroxybenzoic acid	n/a	C7H6O4	154.027	M-H	-	153.019	7	n/a
M153T139	3.60515	4.9e-06	0.0021645	0.00020601	0.0078766	1.815	exp:con	0.0538111	HMDB0013676	2,6-Dihydroxybenzoic acid	n/a	C7H6O4	154.027	M-H	-	153.019	7	n/a
M153T139	3.60515	4.9e-06	0.0021645	0.00020601	0.0078766	1.815	exp:con	0.0538111	HMDB0000397	2-Pyrocatechuic acid	C00196	C7H6O4	154.027	M-H	-	153.019	7	map00362 Benzoate degradation;map00627 Aminobenzoate degradation;map01053 Biosynthesis of siderophore group nonribosomal peptides;map01061 Biosynthesis of phenylpropanoids;map01110 Biosynthesis of secondary metabolites;map01120 Microbial metabolism in diverse environments;map01130 Biosynthesis of antibiotics;
M153T61	0.15517	7.57e-05	0.0021645	0.000967435	0.0078766	1.84488	exp:con	0.00650904	HMDB0156374	3-(1H-imidazol-5-yl)oxirane-2-carboxylic acid	n/a	C6H6N2O3	154.038	M-H	-	153.031	9	n/a
M153T61	0.15517	7.57e-05	0.0021645	0.000967435	0.0078766	1.84488	exp:con	0.00650904	HMDB0160105	24048-74-6	n/a	C6H6N2O3	154.038	M-H	-	153.031	9	n/a
M165T155	0.405777	1.13e-09	0.0021645	1.29e-06	0.0078766	1.58419	exp:con	8.45e-12	HMDB0168681	4-ethoxybenzoic acid	n/a	C9H10O3	166.063	M-H	-	165.056	2	n/a
M165T155	0.405777	1.13e-09	0.0021645	1.29e-06	0.0078766	1.58419	exp:con	8.45e-12	HMDB0041611	Ethyl 2-furanacrylate	n/a	C9H10O3	166.063	M-H	-	165.056	2	n/a
M165T155	0.405777	1.13e-09	0.0021645	1.29e-06	0.0078766	1.58419	exp:con	8.45e-12	HMDB0062348	3,5-Dimethoxybenzaldehyde	n/a	C9H10O3	166.063	M-H	-	165.056	2	n/a
M165T155	0.405777	1.13e-09	0.0021645	1.29e-06	0.0078766	1.58419	exp:con	8.45e-12	HMDB0125519	4-ethenyl-6-methoxybenzene-1,3-diol	n/a	C9H10O3	166.063	M-H	-	165.056	2	n/a
M165T155	0.405777	1.13e-09	0.0021645	1.29e-06	0.0078766	1.58419	exp:con	8.45e-12	HMDB0166615	4-[(1Z)-3-hydroxyprop-1-en-1-yl]benzene-1,2-diol	n/a	C9H10O3	166.063	M-H	-	165.056	2	n/a
M165T155	0.405777	1.13e-09	0.0021645	1.29e-06	0.0078766	1.58419	exp:con	8.45e-12	HMDB0167324	AKOS023569996	n/a	C9H10O3	166.063	M-H	-	165.056	2	n/a
M165T155	0.405777	1.13e-09	0.0021645	1.29e-06	0.0078766	1.58419	exp:con	8.45e-12	HMDB0168656	2-hydroxyethyl benzoate	n/a	C9H10O3	166.063	M-H	-	165.056	2	n/a
M165T155	0.405777	1.13e-09	0.0021645	1.29e-06	0.0078766	1.58419	exp:con	8.45e-12	HMDB0168684	4-Ethoxy-3-hydroxybenzaldehyde	n/a	C9H10O3	166.063	M-H	-	165.056	2	n/a
M165T155	0.405777	1.13e-09	0.0021645	1.29e-06	0.0078766	1.58419	exp:con	8.45e-12	HMDB0168682	4-ethoxy-2-hydroxybenzaldehyde	n/a	C9H10O3	166.063	M-H	-	165.056	2	n/a
M165T155	0.405777	1.13e-09	0.0021645	1.29e-06	0.0078766	1.58419	exp:con	8.45e-12	HMDB0168683	4-(2-hydroxyethoxy)benzaldehyde	n/a	C9H10O3	166.063	M-H	-	165.056	2	n/a
M165T155	0.405777	1.13e-09	0.0021645	1.29e-06	0.0078766	1.58419	exp:con	8.45e-12	HMDB0171689	(4-Methylphenoxy)acetic acid	n/a	C9H10O3	166.063	M-H	-	165.056	2	n/a
M165T155	0.405777	1.13e-09	0.0021645	1.29e-06	0.0078766	1.58419	exp:con	8.45e-12	HMDB0177510	1-(4-hydroxyphenyl)prop-1-ene-1,2-diol	n/a	C9H10O3	166.063	M-H	-	165.056	2	n/a
M165T155	0.405777	1.13e-09	0.0021645	1.29e-06	0.0078766	1.58419	exp:con	8.45e-12	HMDB0180874	SCHEMBL7737611	n/a	C9H10O3	166.063	M-H	-	165.056	2	n/a
M165T155	0.405777	1.13e-09	0.0021645	1.29e-06	0.0078766	1.58419	exp:con	8.45e-12	HMDB0180875	62600-15-1	n/a	C9H10O3	166.063	M-H	-	165.056	2	n/a
M165T155	0.405777	1.13e-09	0.0021645	1.29e-06	0.0078766	1.58419	exp:con	8.45e-12	HMDB0180872	5-Allylbenzene-1,2,3-triol	n/a	C9H10O3	166.063	M-H	-	165.056	2	n/a
M165T155	0.405777	1.13e-09	0.0021645	1.29e-06	0.0078766	1.58419	exp:con	8.45e-12	HMDB0180873	SCHEMBL978929	n/a	C9H10O3	166.063	M-H	-	165.056	2	n/a
M165T155	0.405777	1.13e-09	0.0021645	1.29e-06	0.0078766	1.58419	exp:con	8.45e-12	HMDB0166610	3-(3,4-dihydroxyphenyl)propanal	n/a	C9H10O3	166.063	M-H	-	165.056	2	n/a
M165T155	0.405777	1.13e-09	0.0021645	1.29e-06	0.0078766	1.58419	exp:con	8.45e-12	HMDB0166065	4-hydroxybenzyl acetate	n/a	C9H10O3	166.063	M-H	-	165.056	2	n/a
M165T155	0.405777	1.13e-09	0.0021645	1.29e-06	0.0078766	1.58419	exp:con	8.45e-12	HMDB0142136	2-(2-hydroxyphenyl)propanoic acid	n/a	C9H10O3	166.063	M-H	-	165.056	2	n/a
M165T155	0.405777	1.13e-09	0.0021645	1.29e-06	0.0078766	1.58419	exp:con	8.45e-12	HMDB0125525	5-ethenyl-3-methoxybenzene-1,2-diol	n/a	C9H10O3	166.063	M-H	-	165.056	2	n/a
M165T155	0.405777	1.13e-09	0.0021645	1.29e-06	0.0078766	1.58419	exp:con	8.45e-12	HMDB0125539	4-ethenyl-2-methoxybenzene-1,3-diol	n/a	C9H10O3	166.063	M-H	-	165.056	2	n/a
M165T155	0.405777	1.13e-09	0.0021645	1.29e-06	0.0078766	1.58419	exp:con	8.45e-12	HMDB0134035	3-hydroxy-3-(2-hydroxyphenyl)propanal	n/a	C9H10O3	166.063	M-H	-	165.056	2	n/a
M165T155	0.405777	1.13e-09	0.0021645	1.29e-06	0.0078766	1.58419	exp:con	8.45e-12	HMDB0134033	3-(2,5-dihydroxyphenyl)propanal	n/a	C9H10O3	166.063	M-H	-	165.056	2	n/a
M165T155	0.405777	1.13e-09	0.0021645	1.29e-06	0.0078766	1.58419	exp:con	8.45e-12	HMDB0134034	2-hydroxy-3-(2-hydroxyphenyl)propanal	n/a	C9H10O3	166.063	M-H	-	165.056	2	n/a
M165T155	0.405777	1.13e-09	0.0021645	1.29e-06	0.0078766	1.58419	exp:con	8.45e-12	HMDB0134032	3-(2,3-dihydroxyphenyl)propanal	n/a	C9H10O3	166.063	M-H	-	165.056	2	n/a
M165T155	0.405777	1.13e-09	0.0021645	1.29e-06	0.0078766	1.58419	exp:con	8.45e-12	HMDB0134037	2-[3-(hydroxymethyl)oxiran-2-yl]phenol	n/a	C9H10O3	166.063	M-H	-	165.056	2	n/a
M165T155	0.405777	1.13e-09	0.0021645	1.29e-06	0.0078766	1.58419	exp:con	8.45e-12	HMDB0134038	2-(3-hydroxyprop-1-en-1-yl)benzene-1,4-diol	n/a	C9H10O3	166.063	M-H	-	165.056	2	n/a
M165T155	0.405777	1.13e-09	0.0021645	1.29e-06	0.0078766	1.58419	exp:con	8.45e-12	HMDB0134036	3-(3-hydroxyprop-1-en-1-yl)benzene-1,2-diol	n/a	C9H10O3	166.063	M-H	-	165.056	2	n/a
M165T155	0.405777	1.13e-09	0.0021645	1.29e-06	0.0078766	1.58419	exp:con	8.45e-12	HMDB0137472	4-[(E)-2-hydroxyethenyl]-2-methoxyphenol	n/a	C9H10O3	166.063	M-H	-	165.056	2	n/a
M165T155	0.405777	1.13e-09	0.0021645	1.29e-06	0.0078766	1.58419	exp:con	8.45e-12	HMDB0141765	4-[(1E)-3-hydroxyprop-1-en-1-yl]benzene-1,2-diol	C12206	C9H10O3	166.063	M-H	-	165.056	2	map00940 Phenylpropanoid biosynthesis;map01110 Biosynthesis of secondary metabolites;
M165T155	0.405777	1.13e-09	0.0021645	1.29e-06	0.0078766	1.58419	exp:con	8.45e-12	HMDB0141766	4-[3-(hydroxymethyl)oxiran-2-yl]phenol	n/a	C9H10O3	166.063	M-H	-	165.056	2	n/a
M165T155	0.405777	1.13e-09	0.0021645	1.29e-06	0.0078766	1.58419	exp:con	8.45e-12	HMDB0240325	2-(4-Hydroxyphenyl)propionate	n/a	C9H9O3	165.056	M-H	-	165.056	2	n/a
M165T155	0.405777	1.13e-09	0.0021645	1.29e-06	0.0078766	1.58419	exp:con	8.45e-12	HMDB0000563	D-Phenyllactic acid	C05607	C9H10O3	166.063	M-H	-	165.056	2	map00360 Phenylalanine metabolism;map00960 Tropane, piperidine and pyridine alkaloid biosynthesis;map01064 Biosynthesis of alkaloids derived from ornithine, lysine and nicotinic acid;
M165T155	0.405777	1.13e-09	0.0021645	1.29e-06	0.0078766	1.58419	exp:con	8.45e-12	HMDB0033752	3-(2-Hydroxyphenyl)propanoic acid	C01198	C9H10O3	166.063	M-H	-	165.056	2	map00360 Phenylalanine metabolism;map00624 Polycyclic aromatic hydrocarbon degradation;map01120 Microbial metabolism in diverse environments;
M165T155	0.405777	1.13e-09	0.0021645	1.29e-06	0.0078766	1.58419	exp:con	8.45e-12	HMDB0032605	Methyl 2-methoxybenzoate	n/a	C9H10O3	166.063	M-H	-	165.056	2	n/a
M165T155	0.405777	1.13e-09	0.0021645	1.29e-06	0.0078766	1.58419	exp:con	8.45e-12	HMDB0032573	Ethylparaben	n/a	C9H10O3	166.063	M-H	-	165.056	2	n/a
M165T155	0.405777	1.13e-09	0.0021645	1.29e-06	0.0078766	1.58419	exp:con	8.45e-12	HMDB0032639	Methyl 4-methoxybenzoate	n/a	C9H10O3	166.063	M-H	-	165.056	2	n/a
M165T155	0.405777	1.13e-09	0.0021645	1.29e-06	0.0078766	1.58419	exp:con	8.45e-12	HMDB0031132	3,4-Dihydroxyphenylacetone	n/a	C9H10O3	166.063	M-H	-	165.056	2	n/a
M165T155	0.405777	1.13e-09	0.0021645	1.29e-06	0.0078766	1.58419	exp:con	8.45e-12	HMDB0032138	3,4-Dimethoxybenzaldehyde	C02201	C9H10O3	166.063	M-H	-	165.056	2	n/a
M165T155	0.405777	1.13e-09	0.0021645	1.29e-06	0.0078766	1.58419	exp:con	8.45e-12	HMDB0142137	2-hydroxy-2-phenylpropanoic acid	n/a	C9H10O3	166.063	M-H	-	165.056	2	n/a
M165T155	0.405777	1.13e-09	0.0021645	1.29e-06	0.0078766	1.58419	exp:con	8.45e-12	HMDB0041683	4-Hydroxyphenyl-2-propionic acid	C03080	C9H10O3	166.063	M-H	-	165.056	2	n/a
M165T155	0.405777	1.13e-09	0.0021645	1.29e-06	0.0078766	1.58419	exp:con	8.45e-12	HMDB0062590	Tropate	C01456	C9H10O3	166.063	M-H	-	165.056	2	map00960 Tropane, piperidine and pyridine alkaloid biosynthesis;map01064 Biosynthesis of alkaloids derived from ornithine, lysine and nicotinic acid;map01110 Biosynthesis of secondary metabolites;
M165T155	0.405777	1.13e-09	0.0021645	1.29e-06	0.0078766	1.58419	exp:con	8.45e-12	HMDB0059969	3-Methoxyphenylacetic acid	n/a	C9H10O3	166.063	M-H	-	165.056	2	n/a
M165T155	0.405777	1.13e-09	0.0021645	1.29e-06	0.0078766	1.58419	exp:con	8.45e-12	HMDB0034243	Ipomeanine	n/a	C9H10O3	166.063	M-H	-	165.056	2	n/a
M165T155	0.405777	1.13e-09	0.0021645	1.29e-06	0.0078766	1.58419	exp:con	8.45e-12	HMDB0040645	3-Hydroxy-1-(4-hydroxyphenyl)-1-propanone	n/a	C9H10O3	166.063	M-H	-	165.056	2	n/a
M165T155	0.405777	1.13e-09	0.0021645	1.29e-06	0.0078766	1.58419	exp:con	8.45e-12	HMDB0032030	Guaicyl acetate	n/a	C9H10O3	166.063	M-H	-	165.056	2	n/a
M165T155	0.405777	1.13e-09	0.0021645	1.29e-06	0.0078766	1.58419	exp:con	8.45e-12	HMDB0002199	Desaminotyrosine	C01744	C9H10O3	166.063	M-H	-	165.056	2	n/a
M165T155	0.405777	1.13e-09	0.0021645	1.29e-06	0.0078766	1.58419	exp:con	8.45e-12	HMDB0000375	3-(3-Hydroxyphenyl)propanoic acid	C11457	C9H10O3	166.063	M-H	-	165.056	2	map00360 Phenylalanine metabolism;map01120 Microbial metabolism in diverse environments;map01220 Degradation of aromatic compounds;
M165T155	0.405777	1.13e-09	0.0021645	1.29e-06	0.0078766	1.58419	exp:con	8.45e-12	HMDB0000748	L-3-Phenyllactic acid	C05607	C9H10O3	166.063	M-H	-	165.056	2	map00360 Phenylalanine metabolism;map00960 Tropane, piperidine and pyridine alkaloid biosynthesis;map01064 Biosynthesis of alkaloids derived from ornithine, lysine and nicotinic acid;
M165T155	0.405777	1.13e-09	0.0021645	1.29e-06	0.0078766	1.58419	exp:con	8.45e-12	HMDB0000779	Phenyllactic acid	C01479	C9H10O3	166.063	M-H	-	165.056	2	map00960 Tropane, piperidine and pyridine alkaloid biosynthesis;map01110 Biosynthesis of secondary metabolites;
M165T155	0.405777	1.13e-09	0.0021645	1.29e-06	0.0078766	1.58419	exp:con	8.45e-12	HMDB0002072	4-Methoxyphenylacetic acid	n/a	C9H10O3	166.063	M-H	-	165.056	2	n/a
M165T155	0.405777	1.13e-09	0.0021645	1.29e-06	0.0078766	1.58419	exp:con	8.45e-12	HMDB0002229	3-Phenoxypropionic acid	n/a	C9H10O3	166.063	M-H	-	165.056	2	n/a
M165T155	0.405777	1.13e-09	0.0021645	1.29e-06	0.0078766	1.58419	exp:con	8.45e-12	HMDB0005175	Homovanillin	C05581	C9H10O3	166.063	M-H	-	165.056	2	map00350 Tyrosine metabolism;map01100 Metabolic pathways;
M165T155	0.405777	1.13e-09	0.0021645	1.29e-06	0.0078766	1.58419	exp:con	8.45e-12	HMDB0029817	Ethyl salicylate	n/a	C9H10O3	166.063	M-H	-	165.056	2	n/a
M165T155	0.405777	1.13e-09	0.0021645	1.29e-06	0.0078766	1.58419	exp:con	8.45e-12	HMDB0034993	4-Methoxybenzyl formate	n/a	C9H10O3	166.063	M-H	-	165.056	2	n/a
M165T155	0.405777	1.13e-09	0.0021645	1.29e-06	0.0078766	1.58419	exp:con	8.45e-12	HMDB0029665	Ethyl vanillin	n/a	C9H10O3	166.063	M-H	-	165.056	2	n/a
M165T155	0.405777	1.13e-09	0.0021645	1.29e-06	0.0078766	1.58419	exp:con	8.45e-12	HMDB0124925	3-hydroxy-3-phenylpropanoic acid	n/a	C9H10O3	166.063	M-H	-	165.056	2	n/a
M165T155	0.405777	1.13e-09	0.0021645	1.29e-06	0.0078766	1.58419	exp:con	8.45e-12	HMDB0168657	Ethyl 3-hydroxybenzoate	n/a	C9H10O3	166.063	M-H	-	165.056	2	n/a
M165T155	0.405777	1.13e-09	0.0021645	1.29e-06	0.0078766	1.58419	exp:con	8.45e-12	HMDB0062026	703-23-1	n/a	C9H10O3	166.063	M-H	-	165.056	2	n/a
M177T58	0.468426	0.000233488	0.0021645	0.00201159	0.0078766	1.27205	exp:con	0.11111	HMDB0164028	4-ethoxy-2,3-dihydroxy-4-oxobutanoic acid	n/a	C6H10O6	178.048	M-H	-	177.04	7	n/a
M177T58	0.468426	0.000233488	0.0021645	0.00201159	0.0078766	1.27205	exp:con	0.11111	HMDB0003466	L-Gulonolactone	C01040	C6H10O6	178.048	M-H	-	177.04	7	map00053 Ascorbate and aldarate metabolism;map01100 Metabolic pathways;
M177T58	0.468426	0.000233488	0.0021645	0.00201159	0.0078766	1.27205	exp:con	0.11111	HMDB0002541	Galactonolactone	C03383	C6H10O6	178.048	M-H	-	177.04	7	map00052 Galactose metabolism;map01100 Metabolic pathways;
M177T58	0.468426	0.000233488	0.0021645	0.00201159	0.0078766	1.27205	exp:con	0.11111	HMDB0001385	3-Keto-b-D-galactose	C05394	C6H10O6	178.048	M-H	-	177.04	7	n/a
M177T58	0.468426	0.000233488	0.0021645	0.00201159	0.0078766	1.27205	exp:con	0.11111	HMDB0001353	2-Keto-3-deoxy-D-gluconic acid	C01216	C6H10O6	178.048	M-H	-	177.04	7	map00052 Galactose metabolism;map01100 Metabolic pathways;map01120 Microbial metabolism in diverse environments;
M177T58	0.468426	0.000233488	0.0021645	0.00201159	0.0078766	1.27205	exp:con	0.11111	HMDB0000150	Gluconolactone	C00198	C6H10O6	178.048	M-H	-	177.04	7	map00030 Pentose phosphate pathway;map01100 Metabolic pathways;map01110 Biosynthesis of secondary metabolites;map01120 Microbial metabolism in diverse environments;map01130 Biosynthesis of antibiotics;map01200 Carbon metabolism;
M177T58	0.468426	0.000233488	0.0021645	0.00201159	0.0078766	1.27205	exp:con	0.11111	HMDB0029932	D-Arabino-hexos-2-ulose	n/a	C6H10O6	178.048	M-H	-	177.04	7	n/a
M178T130	0.113058	0.000260733	0.0021645	0.00215602	0.0078766	1.97835	exp:con	8.67e-12	HMDB0030372	Maltoxazine	n/a	C10H13NO2	179.095	M-H	-	178.087	7	n/a
M178T130	0.113058	0.000260733	0.0021645	0.00215602	0.0078766	1.97835	exp:con	8.67e-12	HMDB0040021	2,3-Dihydro-5-(3-hydroxypropanoyl)-1H-pyrrolizine	n/a	C10H13NO2	179.095	M-H	-	178.087	7	n/a
M178T130	0.113058	0.000260733	0.0021645	0.00215602	0.0078766	1.97835	exp:con	8.67e-12	HMDB0033763	Ethyl N-methylanthranilate	n/a	C10H13NO2	179.095	M-H	-	178.087	7	n/a
M178T130	0.113058	0.000260733	0.0021645	0.00215602	0.0078766	1.97835	exp:con	8.67e-12	HMDB0039655	1,2,3,4,5,6-Hexahydro-5-(1-hydroxyethylidene)-7H-cyclopenta[b]pyridin-7-one	n/a	C10H13NO2	179.095	M-H	-	178.087	7	n/a
M178T130	0.113058	0.000260733	0.0021645	0.00215602	0.0078766	1.97835	exp:con	8.67e-12	HMDB0031811	3,5-Dimethylphenyl methylcarbamate	C18771	C10H13NO2	179.095	M-H	-	178.087	7	n/a
M178T130	0.113058	0.000260733	0.0021645	0.00215602	0.0078766	1.97835	exp:con	8.67e-12	HMDB0005199	(R)-Salsolinol	C09642	C10H13NO2	179.095	M-H	-	178.087	7	map01063 Biosynthesis of alkaloids derived from shikimate pathway;
M178T130	0.113058	0.000260733	0.0021645	0.00215602	0.0078766	1.97835	exp:con	8.67e-12	HMDB0001189	2(N)-Methyl-norsalsolinol	n/a	C10H13NO2	179.095	M-H	-	178.087	7	n/a
M178T130	0.113058	0.000260733	0.0021645	0.00215602	0.0078766	1.97835	exp:con	8.67e-12	HMDB0029223	alpha-Methylphenylalanine	n/a	C10H13NO2	179.095	M-H	-	178.087	7	n/a
M178T130	0.113058	0.000260733	0.0021645	0.00215602	0.0078766	1.97835	exp:con	8.67e-12	HMDB0042012	Salsolinol	C09642	C10H13NO2	179.095	M-H	-	178.087	7	map01063 Biosynthesis of alkaloids derived from shikimate pathway;
M178T130	0.113058	0.000260733	0.0021645	0.00215602	0.0078766	1.97835	exp:con	8.67e-12	HMDB0029224	N-methylphenylalanine	n/a	C10H13NO2	179.095	M-H	-	178.087	7	n/a
M178T130	0.113058	0.000260733	0.0021645	0.00215602	0.0078766	1.97835	exp:con	8.67e-12	HMDB0041931	3,4-Methylenedioxyamphetamine	C07577	C10H13NO2	179.095	M-H	-	178.087	7	n/a
M179T212	0.484729	0.000677428	0.0021645	0.0040724	0.0078766	1.11412	exp:con	0.19393	HMDB0176254	3-(3-hydroxy-3-methylbutyl)phenol	n/a	C11H16O2	180.115	M-H	-	179.108	6	n/a
M179T212	0.484729	0.000677428	0.0021645	0.0040724	0.0078766	1.11412	exp:con	0.19393	HMDB0164135	4-(4-methoxyphenyl)butan-2-ol	n/a	C11H16O2	180.115	M-H	-	179.108	6	n/a
M179T212	0.484729	0.000677428	0.0021645	0.0040724	0.0078766	1.11412	exp:con	0.19393	HMDB0176256	2-(3-hydroxy-3-methylbutyl)phenol	n/a	C11H16O2	180.115	M-H	-	179.108	6	n/a
M179T212	0.484729	0.000677428	0.0021645	0.0040724	0.0078766	1.11412	exp:con	0.19393	HMDB0176255	4-(3-hydroxy-3-methylbutyl)phenol	n/a	C11H16O2	180.115	M-H	-	179.108	6	n/a
M179T212	0.484729	0.000677428	0.0021645	0.0040724	0.0078766	1.11412	exp:con	0.19393	HMDB0176252	AKOS021031874	n/a	C11H16O2	180.115	M-H	-	179.108	6	n/a
M179T212	0.484729	0.000677428	0.0021645	0.0040724	0.0078766	1.11412	exp:con	0.19393	HMDB0176253	3-methyl-1-phenylbutane-1,3-diol	n/a	C11H16O2	180.115	M-H	-	179.108	6	n/a
M179T212	0.484729	0.000677428	0.0021645	0.0040724	0.0078766	1.11412	exp:con	0.19393	HMDB0163602	3-methyl-2-phenylbutane-1,2-diol	n/a	C11H16O2	180.115	M-H	-	179.108	6	n/a
M179T212	0.484729	0.000677428	0.0021645	0.0040724	0.0078766	1.11412	exp:con	0.19393	HMDB0163605	2-(1-hydroxy-3-methylbutan-2-yl)phenol	n/a	C11H16O2	180.115	M-H	-	179.108	6	n/a
M179T212	0.484729	0.000677428	0.0021645	0.0040724	0.0078766	1.11412	exp:con	0.19393	HMDB0163603	SCHEMBL13082446	n/a	C11H16O2	180.115	M-H	-	179.108	6	n/a
M179T212	0.484729	0.000677428	0.0021645	0.0040724	0.0078766	1.11412	exp:con	0.19393	HMDB0163604	SCHEMBL12872219	n/a	C11H16O2	180.115	M-H	-	179.108	6	n/a
M179T212	0.484729	0.000677428	0.0021645	0.0040724	0.0078766	1.11412	exp:con	0.19393	HMDB0163600	2-methyl-3-phenylbutane-1,4-diol	n/a	C11H16O2	180.115	M-H	-	179.108	6	n/a
M179T212	0.484729	0.000677428	0.0021645	0.0040724	0.0078766	1.11412	exp:con	0.19393	HMDB0163599	3-methyl-2-phenylbutane-1,3-diol	n/a	C11H16O2	180.115	M-H	-	179.108	6	n/a
M179T212	0.484729	0.000677428	0.0021645	0.0040724	0.0078766	1.11412	exp:con	0.19393	HMDB0163240	(2E,5Z)-undeca-2,5,10-trienoic acid	n/a	C11H16O2	180.115	M-H	-	179.108	6	n/a
M179T212	0.484729	0.000677428	0.0021645	0.0040724	0.0078766	1.11412	exp:con	0.19393	HMDB0151242	3-(4-methoxyphenyl)-2-methylpropan-1-ol	n/a	C11H16O2	180.115	M-H	-	179.108	6	n/a
M179T212	0.484729	0.000677428	0.0021645	0.0040724	0.0078766	1.11412	exp:con	0.19393	HMDB0059926	2-tert-Butyl-4-hydroxyanisole	n/a	C11H16O2	180.115	M-H	-	179.108	6	n/a
M179T212	0.484729	0.000677428	0.0021645	0.0040724	0.0078766	1.11412	exp:con	0.19393	HMDB0059925	3-tert-Butyl-4-hydroxyanisole	n/a	C11H16O2	180.115	M-H	-	179.108	6	n/a
M179T212	0.484729	0.000677428	0.0021645	0.0040724	0.0078766	1.11412	exp:con	0.19393	HMDB0036669	(+)-Myrtenyl formate	n/a	C11H16O2	180.115	M-H	-	179.108	6	n/a
M179T212	0.484729	0.000677428	0.0021645	0.0040724	0.0078766	1.11412	exp:con	0.19393	HMDB0032468	2-Phenylpropionaldehyde dimethyl acetal	n/a	C11H16O2	180.115	M-H	-	179.108	6	n/a
M179T212	0.484729	0.000677428	0.0021645	0.0040724	0.0078766	1.11412	exp:con	0.19393	HMDB0030039	Jasmolone	n/a	C11H16O2	180.115	M-H	-	179.108	6	n/a
M179T212	0.484729	0.000677428	0.0021645	0.0040724	0.0078766	1.11412	exp:con	0.19393	HMDB0039957	4-(Butoxymethyl)phenol	n/a	C11H16O2	180.115	M-H	-	179.108	6	n/a
M179T212	0.484729	0.000677428	0.0021645	0.0040724	0.0078766	1.11412	exp:con	0.19393	HMDB0035240	Dihydroactinidiolide	n/a	C11H16O2	180.115	M-H	-	179.108	6	n/a
M179T212	0.484729	0.000677428	0.0021645	0.0040724	0.0078766	1.11412	exp:con	0.19393	HMDB0030007	2,2,7,7-Tetramethyl-1,6-dioxaspiro[4.4]nona-3,8-diene	n/a	C11H16O2	180.115	M-H	-	179.108	6	n/a
M179T212	0.484729	0.000677428	0.0021645	0.0040724	0.0078766	1.11412	exp:con	0.19393	HMDB0039159	Bovolide	n/a	C11H16O2	180.115	M-H	-	179.108	6	n/a
M179T212	0.484729	0.000677428	0.0021645	0.0040724	0.0078766	1.11412	exp:con	0.19393	HMDB0036817	Norecasantalic acid	n/a	C11H16O2	180.115	M-H	-	179.108	6	n/a
M185T139	4.07727	4.7e-06	0.0021645	0.000202855	0.0078766	1.93239	exp:con	0.177881	HMDB0061890	Pyroglutamylglycine	n/a	C7H10N2O4	186.064	M-H	-	185.057	4	n/a
M189T141	0.200582	0.000170445	0.0021645	0.00164203	0.0078766	1.72268	exp:con	1.24e-09	HMDB0000325	3-Hydroxysuberic acid	n/a	C8H14O5	190.084	M-H	-	189.077	4	n/a
M189T141	0.200582	0.000170445	0.0021645	0.00164203	0.0078766	1.72268	exp:con	1.24e-09	HMDB0157326	2-hydroxyoctanedioic Acid	n/a	C8H14O5	190.084	M-H	-	189.077	4	n/a
M189T141	0.200582	0.000170445	0.0021645	0.00164203	0.0078766	1.72268	exp:con	1.24e-09	HMDB0157325	SCHEMBL5970906	n/a	C8H14O5	190.084	M-H	-	189.077	4	n/a
M189T141	0.200582	0.000170445	0.0021645	0.00164203	0.0078766	1.72268	exp:con	1.24e-09	HMDB0040220	Diethyl L-malate	n/a	C8H14O5	190.084	M-H	-	189.077	4	n/a
M189T141	0.200582	0.000170445	0.0021645	0.00164203	0.0078766	1.72268	exp:con	1.24e-09	HMDB0061681	6-(2-Hydroxyethoxy)-6-oxohexanoic acid	n/a	C8H14O5	190.084	M-H	-	189.077	4	n/a
M189T141	0.200582	0.000170445	0.0021645	0.00164203	0.0078766	1.72268	exp:con	1.24e-09	HMDB0166861	SCHEMBL3030846	n/a	C8H14O5	190.084	M-H	-	189.077	4	n/a
M554T135	0.226502	0.00848128	0.025974	0.0248449	0.0560999	1.78685	exp:con	0.0473047	HMDB0183163	3,4,5-trihydroxy-6-(2-{[(6Z,8E,10E,14Z)-1,5,12-trihydroxyicosa-6,8,10,14-tetraen-1-ylidene]amino}ethoxy)oxane-2-carboxylic acid	n/a	C28H45NO10	555.304	M-H	-	554.297	9	n/a
M554T135	0.226502	0.00848128	0.025974	0.0248449	0.0560999	1.78685	exp:con	0.0473047	HMDB0183165	3,4,5-trihydroxy-6-{[(6Z,14Z)-16-hydroxy-19-[(2-hydroxyethyl)-C-hydroxycarbonimidoyl]nonadeca-6,10,12,14-tetraen-9-yl]oxy}oxane-2-carboxylic acid	n/a	C28H45NO10	555.304	M-H	-	554.297	9	n/a
M554T135	0.226502	0.00848128	0.025974	0.0248449	0.0560999	1.78685	exp:con	0.0473047	HMDB0183164	3,4,5-trihydroxy-6-{[(5Z,7E,13Z)-11-hydroxy-1-[(2-hydroxyethyl)-C-hydroxycarbonimidoyl]nonadeca-5,7,9,13-tetraen-4-yl]oxy}oxane-2-carboxylic acid	n/a	C28H45NO10	555.304	M-H	-	554.297	9	n/a
M557T102	2.2586	0.00181019	0.00865801	0.00805241	0.0233787	1.17242	exp:con	2.64e-07	HMDB0040862	Piceatannol 4'-galloylglucoside	n/a	C27H26O13	558.137	M-H	-	557.13	8	n/a
M557T102	2.2586	0.00181019	0.00865801	0.00805241	0.0233787	1.17242	exp:con	2.64e-07	HMDB0150414	6-({7,7'-dihydroxy-5-methoxy-2',2'-dimethyl-2'H,4H-[3,6'-bichromene]-4-yl}oxy)-3,4,5-trihydroxyoxane-2-carboxylic acid	n/a	C27H26O13	558.137	M-H	-	557.13	8	n/a
M557T102	2.2586	0.00181019	0.00865801	0.00805241	0.0233787	1.17242	exp:con	2.64e-07	HMDB0147085	6-{[5,12-dihydroxy-3-methoxy-4-(3-methylbut-2-en-1-yl)-9-oxo-8,17-dioxatetracyclo[8.7.0.0²,⁷.0¹¹,¹⁶]heptadeca-1(10),2(7),3,5,11,13,15-heptaen-14-yl]oxy}-3,4,5-trihydroxyoxane-2-carboxylic acid	n/a	C27H26O13	558.137	M-H	-	557.13	8	n/a
M557T102	2.2586	0.00181019	0.00865801	0.00805241	0.0233787	1.17242	exp:con	2.64e-07	HMDB0147084	6-{[5,14-dihydroxy-3-methoxy-4-(3-methylbut-2-en-1-yl)-9-oxo-8,17-dioxatetracyclo[8.7.0.0²,⁷.0¹¹,¹⁶]heptadeca-1(10),2(7),3,5,11(16),12,14-heptaen-12-yl]oxy}-3,4,5-trihydroxyoxane-2-carboxylic acid	n/a	C27H26O13	558.137	M-H	-	557.13	8	n/a
M557T102	2.2586	0.00181019	0.00865801	0.00805241	0.0233787	1.17242	exp:con	2.64e-07	HMDB0147086	6-{[12,14-dihydroxy-3-methoxy-4-(3-methylbut-2-en-1-yl)-9-oxo-8,17-dioxatetracyclo[8.7.0.0²,⁷.0¹¹,¹⁶]heptadeca-1(10),2(7),3,5,11,13,15-heptaen-5-yl]oxy}-3,4,5-trihydroxyoxane-2-carboxylic acid	n/a	C27H26O13	558.137	M-H	-	557.13	8	n/a
M557T102	2.2586	0.00181019	0.00865801	0.00805241	0.0233787	1.17242	exp:con	2.64e-07	HMDB0147083	6-{[14,15-dihydroxy-3-methoxy-4-(3-methylbut-2-en-1-yl)-9-oxo-8,17-dioxatetracyclo[8.7.0.0²,⁷.0¹¹,¹⁶]heptadeca-1(10),2(7),3,5,11(16),12,14-heptaen-5-yl]oxy}-3,4,5-trihydroxyoxane-2-carboxylic acid	n/a	C27H26O13	558.137	M-H	-	557.13	8	n/a
M557T102	2.2586	0.00181019	0.00865801	0.00805241	0.0233787	1.17242	exp:con	2.64e-07	HMDB0147080	6-({4-[(3,3-dimethyloxiran-2-yl)methyl]-14-hydroxy-3-methoxy-9-oxo-8,17-dioxatetracyclo[8.7.0.0²,⁷.0¹¹,¹⁶]heptadeca-1(10),2(7),3,5,11(16),12,14-heptaen-5-yl}oxy)-3,4,5-trihydroxyoxane-2-carboxylic acid	n/a	C27H26O13	558.137	M-H	-	557.13	8	n/a
M557T102	2.2586	0.00181019	0.00865801	0.00805241	0.0233787	1.17242	exp:con	2.64e-07	HMDB0147079	6-({4-[(3,3-dimethyloxiran-2-yl)methyl]-5-hydroxy-3-methoxy-9-oxo-8,17-dioxatetracyclo[8.7.0.0²,⁷.0¹¹,¹⁶]heptadeca-1(10),2(7),3,5,11(16),12,14-heptaen-14-yl}oxy)-3,4,5-trihydroxyoxane-2-carboxylic acid	n/a	C27H26O13	558.137	M-H	-	557.13	8	n/a
M557T102	2.2586	0.00181019	0.00865801	0.00805241	0.0233787	1.17242	exp:con	2.64e-07	HMDB0150413	6-({7,8'-dihydroxy-5-methoxy-2',2'-dimethyl-2'H,4H-[3,6'-bichromene]-4-yl}oxy)-3,4,5-trihydroxyoxane-2-carboxylic acid	n/a	C27H26O13	558.137	M-H	-	557.13	8	n/a
M557T102	2.2586	0.00181019	0.00865801	0.00805241	0.0233787	1.17242	exp:con	2.64e-07	HMDB0150415	6-({7',8'-dihydroxy-5-methoxy-2',2'-dimethyl-2'H,4H-[3,6'-bichromene]-4-yl}oxy)-3,4,5-trihydroxyoxane-2-carboxylic acid	n/a	C27H26O13	558.137	M-H	-	557.13	8	n/a
M557T102	2.2586	0.00181019	0.00865801	0.00805241	0.0233787	1.17242	exp:con	2.64e-07	HMDB0150417	6-({6,8'-dihydroxy-5-methoxy-2',2'-dimethyl-2'H,4H-[3,6'-bichromene]-4-yl}oxy)-3,4,5-trihydroxyoxane-2-carboxylic acid	n/a	C27H26O13	558.137	M-H	-	557.13	8	n/a
M557T102	2.2586	0.00181019	0.00865801	0.00805241	0.0233787	1.17242	exp:con	2.64e-07	HMDB0150416	6-({6,7-dihydroxy-5-methoxy-2',2'-dimethyl-2'H,4H-[3,6'-bichromene]-4-yl}oxy)-3,4,5-trihydroxyoxane-2-carboxylic acid	n/a	C27H26O13	558.137	M-H	-	557.13	8	n/a
M557T102	2.2586	0.00181019	0.00865801	0.00805241	0.0233787	1.17242	exp:con	2.64e-07	HMDB0150421	3,4,5-trihydroxy-6-{[10-(7-hydroxy-5-methoxy-4-oxo-4H-chromen-3-yl)-5,5-dimethyl-3,6-dioxatricyclo[5.4.0.0²,⁴]undeca-1(7),8,10-trien-8-yl]oxy}oxane-2-carboxylic acid	n/a	C27H26O13	558.137	M-H	-	557.13	8	n/a
M557T102	2.2586	0.00181019	0.00865801	0.00805241	0.0233787	1.17242	exp:con	2.64e-07	HMDB0150423	3,4,5-trihydroxy-6-{[7-hydroxy-2'-(hydroxymethyl)-5-methoxy-2'-methyl-2'H,4H-[3,6'-bichromene]-4-yl]oxy}oxane-2-carboxylic acid	n/a	C27H26O13	558.137	M-H	-	557.13	8	n/a
M557T102	2.2586	0.00181019	0.00865801	0.00805241	0.0233787	1.17242	exp:con	2.64e-07	HMDB0150422	3,4,5-trihydroxy-6-[(3-{8-hydroxy-5,5-dimethyl-3,6-dioxatricyclo[5.4.0.0²,⁴]undeca-1(7),8,10-trien-10-yl}-5-methoxy-4-oxo-4H-chromen-7-yl)oxy]oxane-2-carboxylic acid	n/a	C27H26O13	558.137	M-H	-	557.13	8	n/a
M557T102	2.2586	0.00181019	0.00865801	0.00805241	0.0233787	1.17242	exp:con	2.64e-07	HMDB0150424	3,4,5-trihydroxy-6-{[8'-hydroxy-2'-(hydroxymethyl)-5-methoxy-2'-methyl-2'H,4H-[3,6'-bichromene]-4-yl]oxy}oxane-2-carboxylic acid	n/a	C27H26O13	558.137	M-H	-	557.13	8	n/a
M557T102	2.2586	0.00181019	0.00865801	0.00805241	0.0233787	1.17242	exp:con	2.64e-07	HMDB0169821	{3,4,5-trihydroxy-6-[2,4,6-trihydroxy-3-(4-hydroxy-3-methoxybenzoyl)phenyl]oxan-2-yl}methyl 4-hydroxybenzoate	n/a	C27H26O13	558.137	M-H	-	557.13	8	n/a
M557T102	2.2586	0.00181019	0.00865801	0.00805241	0.0233787	1.17242	exp:con	2.64e-07	HMDB0147081	6-{[5,14-dihydroxy-3-methoxy-4-(3-methylbut-2-en-1-yl)-9-oxo-8,17-dioxatetracyclo[8.7.0.0²,⁷.0¹¹,¹⁶]heptadeca-1(10),2(7),3,5,11(16),12,14-heptaen-15-yl]oxy}-3,4,5-trihydroxyoxane-2-carboxylic acid	n/a	C27H26O13	558.137	M-H	-	557.13	8	n/a
M557T102	2.2586	0.00181019	0.00865801	0.00805241	0.0233787	1.17242	exp:con	2.64e-07	HMDB0147082	6-{[5,15-dihydroxy-3-methoxy-4-(3-methylbut-2-en-1-yl)-9-oxo-8,17-dioxatetracyclo[8.7.0.0²,⁷.0¹¹,¹⁶]heptadeca-1(10),2(7),3,5,11(16),12,14-heptaen-14-yl]oxy}-3,4,5-trihydroxyoxane-2-carboxylic acid	n/a	C27H26O13	558.137	M-H	-	557.13	8	n/a
M557T102	2.2586	0.00181019	0.00865801	0.00805241	0.0233787	1.17242	exp:con	2.64e-07	HMDB0147073	6-{[5,14-dihydroxy-3-methoxy-4-(3-methylbut-2-en-1-yl)-9-oxo-8,17-dioxatetracyclo[8.7.0.0²,⁷.0¹¹,¹⁶]heptadeca-1(10),2(7),3,5,11,13,15-heptaen-13-yl]oxy}-3,4,5-trihydroxyoxane-2-carboxylic acid	n/a	C27H26O13	558.137	M-H	-	557.13	8	n/a
M557T102	2.2586	0.00181019	0.00865801	0.00805241	0.0233787	1.17242	exp:con	2.64e-07	HMDB0147074	6-{[5,13-dihydroxy-3-methoxy-4-(3-methylbut-2-en-1-yl)-9-oxo-8,17-dioxatetracyclo[8.7.0.0²,⁷.0¹¹,¹⁶]heptadeca-1(10),2(7),3,5,11,13,15-heptaen-14-yl]oxy}-3,4,5-trihydroxyoxane-2-carboxylic acid	n/a	C27H26O13	558.137	M-H	-	557.13	8	n/a
M557T102	2.2586	0.00181019	0.00865801	0.00805241	0.0233787	1.17242	exp:con	2.64e-07	HMDB0147077	3,4,5-trihydroxy-6-{[14-hydroxy-4-(4-hydroxy-3-methylbut-2-en-1-yl)-3-methoxy-9-oxo-8,17-dioxatetracyclo[8.7.0.0²,⁷.0¹¹,¹⁶]heptadeca-1(10),2(7),3,5,11(16),12,14-heptaen-5-yl]oxy}oxane-2-carboxylic acid	n/a	C27H26O13	558.137	M-H	-	557.13	8	n/a
M557T102	2.2586	0.00181019	0.00865801	0.00805241	0.0233787	1.17242	exp:con	2.64e-07	HMDB0147076	3,4,5-trihydroxy-6-{[5-hydroxy-4-(4-hydroxy-3-methylbut-2-en-1-yl)-3-methoxy-9-oxo-8,17-dioxatetracyclo[8.7.0.0²,⁷.0¹¹,¹⁶]heptadeca-1(10),2(7),3,5,11(16),12,14-heptaen-14-yl]oxy}oxane-2-carboxylic acid	n/a	C27H26O13	558.137	M-H	-	557.13	8	n/a
M557T102	2.2586	0.00181019	0.00865801	0.00805241	0.0233787	1.17242	exp:con	2.64e-07	HMDB0147075	6-{[13,14-dihydroxy-3-methoxy-4-(3-methylbut-2-en-1-yl)-9-oxo-8,17-dioxatetracyclo[8.7.0.0²,⁷.0¹¹,¹⁶]heptadeca-1(10),2(7),3,5,11(16),12,14-heptaen-5-yl]oxy}-3,4,5-trihydroxyoxane-2-carboxylic acid	n/a	C27H26O13	558.137	M-H	-	557.13	8	n/a
M557T102	2.2586	0.00181019	0.00865801	0.00805241	0.0233787	1.17242	exp:con	2.64e-07	HMDB0170024	4,5-dihydroxy-6-(hydroxymethyl)-2-[2,4,6-trihydroxy-3-(4-hydroxy-3-methoxybenzoyl)phenyl]oxan-3-yl 4-hydroxybenzoate	n/a	C27H26O13	558.137	M-H	-	557.13	8	n/a
M570T137	2.27235	0.00905528	0.004329	0.0260272	0.0134018	1.09856	exp:con	0.125788	HMDB0005774	Endomorphin-2	n/a	C32H37N5O5	571.279	M-H	-	570.272	0	n/a
M607T70_2	0.459563	0.00170131	0.0021645	0.00772139	0.0078766	1.14664	exp:con	0.00457752	HMDB0166234	{5,18-dihydroxy-1,14,21,25-tetramethyl-13,19,24,27-tetraoxo-4,20,23-trioxaheptacyclo[20.3.1.1²,⁵.0³,¹⁸.0³,²¹.0⁶,¹⁵.0⁹,¹⁴]heptacosa-8,11-dien-7-yl}oxidanesulfonic acid	n/a	C28H32O13S	608.156	M-H	-	607.149	9	n/a
M607T70_2	0.459563	0.00170131	0.0021645	0.00772139	0.0078766	1.14664	exp:con	0.00457752	HMDB0166237	{5,18-dihydroxy-1,14,21-trimethyl-25-methylidene-13,19,24,27-tetraoxo-4,20,23-trioxaheptacyclo[20.3.1.1²,⁵.0³,¹⁸.0³,²¹.0⁶,¹⁵.0⁹,¹⁴]heptacos-8-en-7-yl}oxidanesulfonic acid	n/a	C28H32O13S	608.156	M-H	-	607.149	9	n/a
M607T70_2	0.459563	0.00170131	0.0021645	0.00772139	0.0078766	1.14664	exp:con	0.00457752	HMDB0173141	{5-hydroxy-2,9,26-trimethyl-4,10,22,29-tetraoxo-3,19,23,28-tetraoxaoctacyclo[16.9.1.1¹⁸,²⁷.0¹,⁵.0²,²⁴.0⁸,¹⁷.0⁹,¹⁴.0²¹,²⁶]nonacos-13-en-15-yl}oxidanesulfonic acid	n/a	C28H32O13S	608.156	M-H	-	607.149	9	n/a
M607T70_2	0.459563	0.00170131	0.0021645	0.00772139	0.0078766	1.14664	exp:con	0.00457752	HMDB0173145	{5,18-dihydroxy-1,14,21,25-tetramethyl-13,19,24,27-tetraoxo-4,20,23-trioxaheptacyclo[20.3.1.1²,⁵.0³,¹⁸.0³,²¹.0⁶,¹⁵.0⁹,¹⁴]heptacosa-8,10-dien-7-yl}oxidanesulfonic acid	n/a	C28H32O13S	608.156	M-H	-	607.149	9	n/a
M607T108_2	2.12096	0.00180216	0.0021645	0.00802689	0.0078766	1.0098	exp:con	1.49e-07	HMDB0166234	{5,18-dihydroxy-1,14,21,25-tetramethyl-13,19,24,27-tetraoxo-4,20,23-trioxaheptacyclo[20.3.1.1²,⁵.0³,¹⁸.0³,²¹.0⁶,¹⁵.0⁹,¹⁴]heptacosa-8,11-dien-7-yl}oxidanesulfonic acid	n/a	C28H32O13S	608.156	M-H	-	607.149	10	n/a
M607T108_2	2.12096	0.00180216	0.0021645	0.00802689	0.0078766	1.0098	exp:con	1.49e-07	HMDB0166237	{5,18-dihydroxy-1,14,21-trimethyl-25-methylidene-13,19,24,27-tetraoxo-4,20,23-trioxaheptacyclo[20.3.1.1²,⁵.0³,¹⁸.0³,²¹.0⁶,¹⁵.0⁹,¹⁴]heptacos-8-en-7-yl}oxidanesulfonic acid	n/a	C28H32O13S	608.156	M-H	-	607.149	10	n/a
M607T108_2	2.12096	0.00180216	0.0021645	0.00802689	0.0078766	1.0098	exp:con	1.49e-07	HMDB0173141	{5-hydroxy-2,9,26-trimethyl-4,10,22,29-tetraoxo-3,19,23,28-tetraoxaoctacyclo[16.9.1.1¹⁸,²⁷.0¹,⁵.0²,²⁴.0⁸,¹⁷.0⁹,¹⁴.0²¹,²⁶]nonacos-13-en-15-yl}oxidanesulfonic acid	n/a	C28H32O13S	608.156	M-H	-	607.149	10	n/a
M607T108_2	2.12096	0.00180216	0.0021645	0.00802689	0.0078766	1.0098	exp:con	1.49e-07	HMDB0173145	{5,18-dihydroxy-1,14,21,25-tetramethyl-13,19,24,27-tetraoxo-4,20,23-trioxaheptacyclo[20.3.1.1²,⁵.0³,¹⁸.0³,²¹.0⁶,¹⁵.0⁹,¹⁴]heptacosa-8,10-dien-7-yl}oxidanesulfonic acid	n/a	C28H32O13S	608.156	M-H	-	607.149	10	n/a
M620T57	0.238899	0.00252996	0.004329	0.0102376	0.0134018	1.45925	exp:con	0.136498	HMDB0011671	PC(16:1(9Z)/22:0)	n/a	C15H22N5O16P3	621.027	M-H	-	620.02	3	n/a
M678T60	2.56411	7.59e-07	0.0021645	8.42e-05	0.0078766	1.55993	exp:con	0.15789	HMDB0011720	UDP-N-acetylmuraminate	C01050	C20H31N3O19P2	679.103	M-H	-	678.095	2	map00471 D-Glutamine and D-glutamate metabolism;map00520 Amino sugar and nucleotide sugar metabolism;map00550 Peptidoglycan biosynthesis;map01100 Metabolic pathways;
M690T134	2.8982	0.000930864	0.004329	0.00510229	0.0134018	1.50198	exp:con	0.134226	HMDB0000445	Alpha-Tetrasaccharide	C06768	C26H45NO20	691.253	M-H	-	690.246	8	n/a
M722T59_2	2.53854	0.000675102	0.0021645	0.00406513	0.0078766	1.33035	exp:con	0.150103	HMDB0178224	6-{[2-(5-{[3,4-dihydroxy-6-(hydroxymethyl)-5-{[3,4,5-trihydroxy-6-(hydroxymethyl)oxan-2-yl]oxy}oxan-2-yl]oxy}-2,3-dihydroxy-3H-indol-3-yl)acetyl]oxy}-3,4,5-trihydroxyoxane-2-carboxylic acid	n/a	C28H37NO21	723.186	M-H	-	722.179	6	n/a
M722T59_2	2.53854	0.000675102	0.0021645	0.00406513	0.0078766	1.33035	exp:con	0.150103	HMDB0178223	6-({6-[(6-{[3-(carboxymethyl)-2,3-dihydroxy-3H-indol-5-yl]oxy}-4,5-dihydroxy-2-(hydroxymethyl)oxan-3-yl)oxy]-3,4,5-trihydroxyoxan-2-yl}methoxy)-3,4,5-trihydroxyoxane-2-carboxylic acid	n/a	C28H37NO21	723.186	M-H	-	722.179	6	n/a
M722T59_2	2.53854	0.000675102	0.0021645	0.00406513	0.0078766	1.33035	exp:con	0.150103	HMDB0178220	6-{[3-(carboxymethyl)-5-{[3,4-dihydroxy-6-(hydroxymethyl)-5-{[3,4,5-trihydroxy-6-(hydroxymethyl)oxan-2-yl]oxy}oxan-2-yl]oxy}-2-hydroxy-3H-indol-3-yl]oxy}-3,4,5-trihydroxyoxane-2-carboxylic acid	n/a	C28H37NO21	723.186	M-H	-	722.179	6	n/a
M722T59_2	2.53854	0.000675102	0.0021645	0.00406513	0.0078766	1.33035	exp:con	0.150103	HMDB0178222	6-[(2-{[3-(carboxymethyl)-2,3-dihydroxy-3H-indol-5-yl]oxy}-3-hydroxy-6-(hydroxymethyl)-5-{[3,4,5-trihydroxy-6-(hydroxymethyl)oxan-2-yl]oxy}oxan-4-yl)oxy]-3,4,5-trihydroxyoxane-2-carboxylic acid	n/a	C28H37NO21	723.186	M-H	-	722.179	6	n/a
M722T59_2	2.53854	0.000675102	0.0021645	0.00406513	0.0078766	1.33035	exp:con	0.150103	HMDB0178221	6-[(2-{[3-(carboxymethyl)-2,3-dihydroxy-3H-indol-5-yl]oxy}-4-hydroxy-6-(hydroxymethyl)-5-{[3,4,5-trihydroxy-6-(hydroxymethyl)oxan-2-yl]oxy}oxan-3-yl)oxy]-3,4,5-trihydroxyoxane-2-carboxylic acid	n/a	C28H37NO21	723.186	M-H	-	722.179	6	n/a
M722T59_2	2.53854	0.000675102	0.0021645	0.00406513	0.0078766	1.33035	exp:con	0.150103	HMDB0178219	6-[(6-{[3-(carboxymethyl)-2,3-dihydroxy-3H-indol-5-yl]oxy}-4,5-dihydroxy-3-{[3,4,5-trihydroxy-6-(hydroxymethyl)oxan-2-yl]oxy}oxan-2-yl)methoxy]-3,4,5-trihydroxyoxane-2-carboxylic acid	n/a	C28H37NO21	723.186	M-H	-	722.179	6	n/a
M722T59_2	2.53854	0.000675102	0.0021645	0.00406513	0.0078766	1.33035	exp:con	0.150103	HMDB0178216	6-({6-[(6-{[3-(carboxymethyl)-2,3-dihydroxy-3H-indol-5-yl]oxy}-4,5-dihydroxy-2-(hydroxymethyl)oxan-3-yl)oxy]-4,5-dihydroxy-2-(hydroxymethyl)oxan-3-yl}oxy)-3,4,5-trihydroxyoxane-2-carboxylic acid	n/a	C28H37NO21	723.186	M-H	-	722.179	6	n/a
M722T59_2	2.53854	0.000675102	0.0021645	0.00406513	0.0078766	1.33035	exp:con	0.150103	HMDB0178217	6-({2-[(6-{[3-(carboxymethyl)-2,3-dihydroxy-3H-indol-5-yl]oxy}-4,5-dihydroxy-2-(hydroxymethyl)oxan-3-yl)oxy]-3,5-dihydroxy-6-(hydroxymethyl)oxan-4-yl}oxy)-3,4,5-trihydroxyoxane-2-carboxylic acid	n/a	C28H37NO21	723.186	M-H	-	722.179	6	n/a
M722T59_2	2.53854	0.000675102	0.0021645	0.00406513	0.0078766	1.33035	exp:con	0.150103	HMDB0178218	6-({2-[(6-{[3-(carboxymethyl)-2,3-dihydroxy-3H-indol-5-yl]oxy}-4,5-dihydroxy-2-(hydroxymethyl)oxan-3-yl)oxy]-4,5-dihydroxy-6-(hydroxymethyl)oxan-3-yl}oxy)-3,4,5-trihydroxyoxane-2-carboxylic acid	n/a	C28H37NO21	723.186	M-H	-	722.179	6	n/a
M750T133	0.232001	0.000602358	0.0021645	0.00377363	0.0078766	1.57011	exp:con	0.12094	HMDB0137633	3,4,5-trihydroxy-6-({1-hydroxy-4-[8-(2-hydroxypropan-2-yl)-2-oxo-2H,8H,9H-furo[2,3-h]chromen-9-yl]-3,5,6-trimethoxy-10-methyl-9-oxo-9,10-dihydroacridin-2-yl}oxy)oxane-2-carboxylic acid	n/a	C37H37NO16	751.211	M-H	-	750.204	6	n/a
M750T133	0.232001	0.000602358	0.0021645	0.00377363	0.0078766	1.57011	exp:con	0.12094	HMDB0137634	3,4,5-trihydroxy-6-({2-hydroxy-4-[8-(2-hydroxypropan-2-yl)-2-oxo-2H,8H,9H-furo[2,3-h]chromen-9-yl]-3,5,6-trimethoxy-10-methyl-9-oxo-9,10-dihydroacridin-1-yl}oxy)oxane-2-carboxylic acid	n/a	C37H37NO16	751.211	M-H	-	750.204	6	n/a
M750T133	0.232001	0.000602358	0.0021645	0.00377363	0.0078766	1.57011	exp:con	0.12094	HMDB0137635	3,4,5-trihydroxy-6-({8-hydroxy-5-[8-(2-hydroxypropan-2-yl)-2-oxo-2H,8H,9H-furo[2,3-h]chromen-9-yl]-3,4,6-trimethoxy-10-methyl-9-oxo-9,10-dihydroacridin-2-yl}oxy)oxane-2-carboxylic acid	n/a	C37H37NO16	751.211	M-H	-	750.204	6	n/a
M750T133	0.232001	0.000602358	0.0021645	0.00377363	0.0078766	1.57011	exp:con	0.12094	HMDB0137637	6-({4-[8-(1,2-dihydroxypropan-2-yl)-2-oxo-2H,8H,9H-furo[2,3-h]chromen-9-yl]-3,5,6-trimethoxy-10-methyl-9-oxo-9,10-dihydroacridin-1-yl}oxy)-3,4,5-trihydroxyoxane-2-carboxylic acid	n/a	C37H37NO16	751.211	M-H	-	750.204	6	n/a
M750T133	0.232001	0.000602358	0.0021645	0.00377363	0.0078766	1.57011	exp:con	0.12094	HMDB0137636	3,4,5-trihydroxy-6-({7-hydroxy-4-[8-(2-hydroxypropan-2-yl)-2-oxo-2H,8H,9H-furo[2,3-h]chromen-9-yl]-3,5,6-trimethoxy-10-methyl-9-oxo-9,10-dihydroacridin-1-yl}oxy)oxane-2-carboxylic acid	n/a	C37H37NO16	751.211	M-H	-	750.204	6	n/a
M773T52	0.409591	8.08e-05	0.0021645	0.00100655	0.0078766	1.45499	exp:con	0.0940297	HMDB0116559	PGP(i-13:0/i-17:0)	n/a	C36H72O13P2	774.445	M-H	-	773.438	7	n/a
M773T52	0.409591	8.08e-05	0.0021645	0.00100655	0.0078766	1.45499	exp:con	0.0940297	HMDB0116551	PGP(i-13:0/a-17:0)	n/a	C36H72O13P2	774.445	M-H	-	773.438	7	n/a
M773T52	0.409591	8.08e-05	0.0021645	0.00100655	0.0078766	1.45499	exp:con	0.0940297	HMDB0116542	PGP(i-12:0/i-18:0)	n/a	C36H72O13P2	774.445	M-H	-	773.438	7	n/a
M773T52	0.409591	8.08e-05	0.0021645	0.00100655	0.0078766	1.45499	exp:con	0.0940297	HMDB0116523	PGP(a-13:0/i-17:0)	n/a	C36H72O13P2	774.445	M-H	-	773.438	7	n/a
M773T52	0.409591	8.08e-05	0.0021645	0.00100655	0.0078766	1.45499	exp:con	0.0940297	HMDB0116515	PGP(a-13:0/a-17:0)	n/a	C36H72O13P2	774.445	M-H	-	773.438	7	n/a
M773T52	0.409591	8.08e-05	0.0021645	0.00100655	0.0078766	1.45499	exp:con	0.0940297	HMDB0116573	PGP(i-14:0/i-16:0)	n/a	C36H72O13P2	774.445	M-H	-	773.438	7	n/a
M789T52	0.369653	0.00676989	0.0021645	0.0209836	0.0078766	1.21321	exp:con	0.15792	HMDB0144076	(7S,9Z,19Z,21Z)-2,11,13,15,17,23-hexahydroxy-3,7,12,14,16,18,22-heptamethyl-1'-(2-methylpropyl)-8,33-dioxa-24,27,29-triazaspiro[pentacyclo[23.6.1.1⁴,⁷.0⁵,³¹.0²⁶,³⁰]tritriacontane-28,4'-piperidine]-1(31),2,4,9,19,21,23,25,29-nonaene-6,32-dione	n/a	C43H58N4O10	790.415	M-H	-	789.408	3	n/a
M824T59	0.225207	0.00852661	0.00865801	0.0249197	0.0233787	1.39579	exp:con	0.110859	HMDB0042326	TG(14:0/16:1(9Z)/20:4(8Z,11Z,14Z,17Z))	n/a	C53H92O6	824.689	M-H	-	823.682	6	n/a
M824T59	0.225207	0.00852661	0.00865801	0.0249197	0.0233787	1.39579	exp:con	0.110859	HMDB0048597	TG(16:1(9Z)/16:1(9Z)/18:3(6Z,9Z,12Z))	n/a	C53H92O6	824.689	M-H	-	823.682	6	n/a
M824T59	0.225207	0.00852661	0.00865801	0.0249197	0.0233787	1.39579	exp:con	0.110859	HMDB0044878	TG(18:0/14:1(9Z)/18:4(6Z,9Z,12Z,15Z))	n/a	C53H92O6	824.689	M-H	-	823.682	6	n/a
M824T59	0.225207	0.00852661	0.00865801	0.0249197	0.0233787	1.39579	exp:con	0.110859	HMDB0048430	TG(16:1(9Z)/14:0/20:4(8Z,11Z,14Z,17Z))	n/a	C53H92O6	824.689	M-H	-	823.682	6	n/a
M824T59	0.225207	0.00852661	0.00865801	0.0249197	0.0233787	1.39579	exp:con	0.110859	HMDB0048604	TG(16:1(9Z)/16:1(9Z)/18:3(9Z,12Z,15Z))	n/a	C53H92O6	824.689	M-H	-	823.682	6	n/a
M824T59	0.225207	0.00852661	0.00865801	0.0249197	0.0233787	1.39579	exp:con	0.110859	HMDB0048571	TG(16:1(9Z)/14:1(9Z)/20:3(5Z,8Z,11Z))	n/a	C53H92O6	824.689	M-H	-	823.682	6	n/a
M824T59	0.225207	0.00852661	0.00865801	0.0249197	0.0233787	1.39579	exp:con	0.110859	HMDB0049226	TG(18:1(11Z)/14:1(9Z)/18:3(6Z,9Z,12Z))	n/a	C53H92O6	824.689	M-H	-	823.682	6	n/a
M824T59	0.225207	0.00852661	0.00865801	0.0249197	0.0233787	1.39579	exp:con	0.110859	HMDB0045320	TG(18:0/18:4(6Z,9Z,12Z,15Z)/14:1(9Z))	n/a	C53H92O6	824.689	M-H	-	823.682	6	n/a
M824T59	0.225207	0.00852661	0.00865801	0.0249197	0.0233787	1.39579	exp:con	0.110859	HMDB0049233	TG(18:1(11Z)/14:1(9Z)/18:3(9Z,12Z,15Z))	n/a	C53H92O6	824.689	M-H	-	823.682	6	n/a
M824T59	0.225207	0.00852661	0.00865801	0.0249197	0.0233787	1.39579	exp:con	0.110859	HMDB0044534	TG(16:0/20:4(8Z,11Z,14Z,17Z)/14:1(9Z))	n/a	C53H92O6	824.689	M-H	-	823.682	6	n/a
M824T59	0.225207	0.00852661	0.00865801	0.0249197	0.0233787	1.39579	exp:con	0.110859	HMDB0047963	TG(14:1(9Z)/18:1(9Z)/18:3(6Z,9Z,12Z))	n/a	C53H92O6	824.689	M-H	-	823.682	6	n/a
M824T59	0.225207	0.00852661	0.00865801	0.0249197	0.0233787	1.39579	exp:con	0.110859	HMDB0047940	TG(14:1(9Z)/18:1(11Z)/18:3(6Z,9Z,12Z))	n/a	C53H92O6	824.689	M-H	-	823.682	6	n/a
M824T59	0.225207	0.00852661	0.00865801	0.0249197	0.0233787	1.39579	exp:con	0.110859	HMDB0042819	TG(14:0/20:4(8Z,11Z,14Z,17Z)/16:1(9Z))	n/a	C53H92O6	824.689	M-H	-	823.682	6	n/a
M824T59	0.225207	0.00852661	0.00865801	0.0249197	0.0233787	1.39579	exp:con	0.110859	HMDB0042766	TG(14:0/18:3(9Z,12Z,15Z)/18:2(9Z,12Z))	n/a	C53H92O6	824.689	M-H	-	823.682	6	n/a
M824T59	0.225207	0.00852661	0.00865801	0.0249197	0.0233787	1.39579	exp:con	0.110859	HMDB0048577	TG(16:1(9Z)/14:1(9Z)/20:3n6)	n/a	C53H92O6	824.689	M-H	-	823.682	6	n/a
M824T59	0.225207	0.00852661	0.00865801	0.0249197	0.0233787	1.39579	exp:con	0.110859	HMDB0048424	TG(16:1(9Z)/14:0/20:4(5Z,8Z,11Z,14Z))	n/a	C53H92O6	824.689	M-H	-	823.682	6	n/a
M824T59	0.225207	0.00852661	0.00865801	0.0249197	0.0233787	1.39579	exp:con	0.110859	HMDB0042088	TG(14:0/14:0/22:5(7Z,10Z,13Z,16Z,19Z))	n/a	C53H92O6	824.689	M-H	-	823.682	6	n/a
M824T59	0.225207	0.00852661	0.00865801	0.0249197	0.0233787	1.39579	exp:con	0.110859	HMDB0042320	TG(14:0/16:1(9Z)/20:4(5Z,8Z,11Z,14Z))	n/a	C53H92O6	824.689	M-H	-	823.682	6	n/a
M824T59	0.225207	0.00852661	0.00865801	0.0249197	0.0233787	1.39579	exp:con	0.110859	HMDB0042355	TG(14:0/18:1(11Z)/18:4(6Z,9Z,12Z,15Z))	n/a	C53H92O6	824.689	M-H	-	823.682	6	n/a
M824T59	0.225207	0.00852661	0.00865801	0.0249197	0.0233787	1.39579	exp:con	0.110859	HMDB0042147	TG(14:0/16:0/20:5(5Z,8Z,11Z,14Z,17Z))	n/a	C53H92O6	824.689	M-H	-	823.682	6	n/a
M824T59	0.225207	0.00852661	0.00865801	0.0249197	0.0233787	1.39579	exp:con	0.110859	HMDB0042083	TG(14:0/14:0/22:5(4Z,7Z,10Z,13Z,16Z))	n/a	C53H92O6	824.689	M-H	-	823.682	6	n/a
M824T59	0.225207	0.00852661	0.00865801	0.0249197	0.0233787	1.39579	exp:con	0.110859	HMDB0049715	TG(18:1(9Z)/14:0/18:4(6Z,9Z,12Z,15Z))	n/a	C53H92O6	824.689	M-H	-	823.682	6	n/a
M824T59	0.225207	0.00852661	0.00865801	0.0249197	0.0233787	1.39579	exp:con	0.110859	HMDB0010471	TG(18:2(9Z,12Z)/14:0/18:3(9Z,12Z,15Z))	n/a	C53H92O6	824.689	M-H	-	823.682	6	n/a
M824T59	0.225207	0.00852661	0.00865801	0.0249197	0.0233787	1.39579	exp:con	0.110859	HMDB0052397	TG(18:2(9Z,12Z)/14:0/18:3(6Z,9Z,12Z))	n/a	C53H92O6	824.689	M-H	-	823.682	6	n/a
M824T59	0.225207	0.00852661	0.00865801	0.0249197	0.0233787	1.39579	exp:con	0.110859	HMDB0052501	TG(18:2(9Z,12Z)/14:1(9Z)/18:2(9Z,12Z))	n/a	C53H92O6	824.689	M-H	-	823.682	6	n/a
M824T59	0.225207	0.00852661	0.00865801	0.0249197	0.0233787	1.39579	exp:con	0.110859	HMDB0049854	TG(18:1(9Z)/14:1(9Z)/18:3(9Z,12Z,15Z))	n/a	C53H92O6	824.689	M-H	-	823.682	6	n/a
M824T59	0.225207	0.00852661	0.00865801	0.0249197	0.0233787	1.39579	exp:con	0.110859	HMDB0049847	TG(18:1(9Z)/14:1(9Z)/18:3(6Z,9Z,12Z))	n/a	C53H92O6	824.689	M-H	-	823.682	6	n/a
M824T59	0.225207	0.00852661	0.00865801	0.0249197	0.0233787	1.39579	exp:con	0.110859	HMDB0049087	TG(18:1(11Z)/14:0/18:4(6Z,9Z,12Z,15Z))	n/a	C53H92O6	824.689	M-H	-	823.682	6	n/a
M824T59	0.225207	0.00852661	0.00865801	0.0249197	0.0233787	1.39579	exp:con	0.110859	HMDB0048473	TG(16:1(9Z)/16:0/18:4(6Z,9Z,12Z,15Z))	n/a	C53H92O6	824.689	M-H	-	823.682	6	n/a
M824T59	0.225207	0.00852661	0.00865801	0.0249197	0.0233787	1.39579	exp:con	0.110859	HMDB0042556	TG(14:0/18:3(6Z,9Z,12Z)/18:2(9Z,12Z))	n/a	C53H92O6	824.689	M-H	-	823.682	6	n/a
M824T59	0.225207	0.00852661	0.00865801	0.0249197	0.0233787	1.39579	exp:con	0.110859	HMDB0042698	TG(14:0/22:4(7Z,10Z,13Z,16Z)/14:1(9Z))	n/a	C53H92O6	824.689	M-H	-	823.682	6	n/a
M824T59	0.225207	0.00852661	0.00865801	0.0249197	0.0233787	1.39579	exp:con	0.110859	HMDB0047913	TG(14:1(9Z)/16:1(9Z)/20:3(5Z,8Z,11Z))	n/a	C53H92O6	824.689	M-H	-	823.682	6	n/a
M824T59	0.225207	0.00852661	0.00865801	0.0249197	0.0233787	1.39579	exp:con	0.110859	HMDB0047970	TG(14:1(9Z)/18:1(9Z)/18:3(9Z,12Z,15Z))	n/a	C53H92O6	824.689	M-H	-	823.682	6	n/a
M824T59	0.225207	0.00852661	0.00865801	0.0249197	0.0233787	1.39579	exp:con	0.110859	HMDB0048095	TG(14:1(9Z)/18:3(6Z,9Z,12Z)/18:1(9Z))	n/a	C53H92O6	824.689	M-H	-	823.682	6	n/a
M824T59	0.225207	0.00852661	0.00865801	0.0249197	0.0233787	1.39579	exp:con	0.110859	HMDB0044507	TG(16:0/18:4(6Z,9Z,12Z,15Z)/16:1(9Z))	n/a	C53H92O6	824.689	M-H	-	823.682	6	n/a
M824T59	0.225207	0.00852661	0.00865801	0.0249197	0.0233787	1.39579	exp:con	0.110859	HMDB0047919	TG(14:1(9Z)/16:1(9Z)/20:3n6)	n/a	C53H92O6	824.689	M-H	-	823.682	6	n/a
M824T59	0.225207	0.00852661	0.00865801	0.0249197	0.0233787	1.39579	exp:con	0.110859	HMDB0042843	TG(14:0/20:5(5Z,8Z,11Z,14Z,17Z)/16:0)	n/a	C53H92O6	824.689	M-H	-	823.682	6	n/a
M824T59	0.225207	0.00852661	0.00865801	0.0249197	0.0233787	1.39579	exp:con	0.110859	HMDB0048001	TG(14:1(9Z)/20:3(5Z,8Z,11Z)/16:1(9Z))	n/a	C53H92O6	824.689	M-H	-	823.682	6	n/a
M824T59	0.225207	0.00852661	0.00865801	0.0249197	0.0233787	1.39579	exp:con	0.110859	HMDB0047738	TG(14:1(9Z)/14:0/22:4(7Z,10Z,13Z,16Z))	n/a	C53H92O6	824.689	M-H	-	823.682	6	n/a
M824T59	0.225207	0.00852661	0.00865801	0.0249197	0.0233787	1.39579	exp:con	0.110859	HMDB0042527	TG(14:0/18:2(9Z,12Z)/18:3(6Z,9Z,12Z))	n/a	C53H92O6	824.689	M-H	-	823.682	6	n/a
M824T59	0.225207	0.00852661	0.00865801	0.0249197	0.0233787	1.39579	exp:con	0.110859	HMDB0044075	TG(16:0/16:1(9Z)/18:4(6Z,9Z,12Z,15Z))	n/a	C53H92O6	824.689	M-H	-	823.682	6	n/a
M824T59	0.225207	0.00852661	0.00865801	0.0249197	0.0233787	1.39579	exp:con	0.110859	HMDB0048255	TG(14:1(9Z)/18:3(9Z,12Z,15Z)/18:1(11Z))	n/a	C53H92O6	824.689	M-H	-	823.682	6	n/a
M824T59	0.225207	0.00852661	0.00865801	0.0249197	0.0233787	1.39579	exp:con	0.110859	HMDB0047782	TG(14:1(9Z)/16:0/20:4(5Z,8Z,11Z,14Z))	n/a	C53H92O6	824.689	M-H	-	823.682	6	n/a
M824T59	0.225207	0.00852661	0.00865801	0.0249197	0.0233787	1.39579	exp:con	0.110859	HMDB0048256	TG(14:1(9Z)/18:3(9Z,12Z,15Z)/18:1(9Z))	n/a	C53H92O6	824.689	M-H	-	823.682	6	n/a
M824T59	0.225207	0.00852661	0.00865801	0.0249197	0.0233787	1.39579	exp:con	0.110859	HMDB0048094	TG(14:1(9Z)/18:3(6Z,9Z,12Z)/18:1(11Z))	n/a	C53H92O6	824.689	M-H	-	823.682	6	n/a
M824T59	0.225207	0.00852661	0.00865801	0.0249197	0.0233787	1.39579	exp:con	0.110859	HMDB0043014	TG(15:0/15:0/20:5(5Z,8Z,11Z,14Z,17Z))	n/a	C53H92O6	824.689	M-H	-	823.682	6	n/a
M824T59	0.225207	0.00852661	0.00865801	0.0249197	0.0233787	1.39579	exp:con	0.110859	HMDB0043853	TG(16:0/14:0/20:5(5Z,8Z,11Z,14Z,17Z))	n/a	C53H92O6	824.689	M-H	-	823.682	6	n/a
M824T59	0.225207	0.00852661	0.00865801	0.0249197	0.0233787	1.39579	exp:con	0.110859	HMDB0048077	TG(14:1(9Z)/18:2(9Z,12Z)/18:2(9Z,12Z))	n/a	C53H92O6	824.689	M-H	-	823.682	6	n/a
M824T59	0.225207	0.00852661	0.00865801	0.0249197	0.0233787	1.39579	exp:con	0.110859	HMDB0042639	TG(14:0/20:4(5Z,8Z,11Z,14Z)/16:1(9Z))	n/a	C53H92O6	824.689	M-H	-	823.682	6	n/a
M824T59	0.225207	0.00852661	0.00865801	0.0249197	0.0233787	1.39579	exp:con	0.110859	HMDB0042790	TG(14:0/18:4(6Z,9Z,12Z,15Z)/18:1(11Z))	n/a	C53H92O6	824.689	M-H	-	823.682	6	n/a
M824T59	0.225207	0.00852661	0.00865801	0.0249197	0.0233787	1.39579	exp:con	0.110859	HMDB0047947	TG(14:1(9Z)/18:1(11Z)/18:3(9Z,12Z,15Z))	n/a	C53H92O6	824.689	M-H	-	823.682	6	n/a
M824T59	0.225207	0.00852661	0.00865801	0.0249197	0.0233787	1.39579	exp:con	0.110859	HMDB0044042	TG(16:0/14:1(9Z)/20:4(5Z,8Z,11Z,14Z))	n/a	C53H92O6	824.689	M-H	-	823.682	6	n/a
M824T59	0.225207	0.00852661	0.00865801	0.0249197	0.0233787	1.39579	exp:con	0.110859	HMDB0048139	TG(14:1(9Z)/20:3n6/16:1(9Z))	n/a	C53H92O6	824.689	M-H	-	823.682	6	n/a
M824T59	0.225207	0.00852661	0.00865801	0.0249197	0.0233787	1.39579	exp:con	0.110859	HMDB0044366	TG(16:0/20:4(5Z,8Z,11Z,14Z)/14:1(9Z))	n/a	C53H92O6	824.689	M-H	-	823.682	6	n/a
M824T59	0.225207	0.00852661	0.00865801	0.0249197	0.0233787	1.39579	exp:con	0.110859	HMDB0044048	TG(16:0/14:1(9Z)/20:4(8Z,11Z,14Z,17Z))	n/a	C53H92O6	824.689	M-H	-	823.682	6	n/a
M824T59	0.225207	0.00852661	0.00865801	0.0249197	0.0233787	1.39579	exp:con	0.110859	HMDB0042534	TG(14:0/18:2(9Z,12Z)/18:3(9Z,12Z,15Z))	n/a	C53H92O6	824.689	M-H	-	823.682	6	n/a
M824T59	0.225207	0.00852661	0.00865801	0.0249197	0.0233787	1.39579	exp:con	0.110859	HMDB0047810	TG(14:1(9Z)/18:0/18:4(6Z,9Z,12Z,15Z))	n/a	C53H92O6	824.689	M-H	-	823.682	6	n/a
M824T59	0.225207	0.00852661	0.00865801	0.0249197	0.0233787	1.39579	exp:con	0.110859	HMDB0042791	TG(14:0/18:4(6Z,9Z,12Z,15Z)/18:1(9Z))	n/a	C53H92O6	824.689	M-H	-	823.682	6	n/a
M824T59	0.225207	0.00852661	0.00865801	0.0249197	0.0233787	1.39579	exp:con	0.110859	HMDB0047788	TG(14:1(9Z)/16:0/20:4(8Z,11Z,14Z,17Z))	n/a	C53H92O6	824.689	M-H	-	823.682	6	n/a
M824T59	0.225207	0.00852661	0.00865801	0.0249197	0.0233787	1.39579	exp:con	0.110859	HMDB0042385	TG(14:0/18:1(9Z)/18:4(6Z,9Z,12Z,15Z))	n/a	C53H92O6	824.689	M-H	-	823.682	6	n/a
M824T59	0.225207	0.00852661	0.00865801	0.0249197	0.0233787	1.39579	exp:con	0.110859	HMDB0042292	TG(14:0/14:1(9Z)/22:4(7Z,10Z,13Z,16Z))	n/a	C53H92O6	824.689	M-H	-	823.682	6	n/a
M824T59	0.225207	0.00852661	0.00865801	0.0249197	0.0233787	1.39579	exp:con	0.110859	HMDB0042871	TG(14:0/22:5(7Z,10Z,13Z,16Z,19Z)/14:0)	n/a	C53H92O6	824.689	M-H	-	823.682	6	n/a
M824T59	0.225207	0.00852661	0.00865801	0.0249197	0.0233787	1.39579	exp:con	0.110859	HMDB0043714	TG(15:0/20:5(5Z,8Z,11Z,14Z,17Z)/15:0)	n/a	C53H92O6	824.689	M-H	-	823.682	6	n/a
M824T59	0.225207	0.00852661	0.00865801	0.0249197	0.0233787	1.39579	exp:con	0.110859	HMDB0042721	TG(14:0/22:5(4Z,7Z,10Z,13Z,16Z)/14:0)	n/a	C53H92O6	824.689	M-H	-	823.682	6	n/a
M824T59	0.225207	0.00852661	0.00865801	0.0249197	0.0233787	1.39579	exp:con	0.110859	HMDB0048765	TG(16:1(9Z)/18:3(6Z,9Z,12Z)/16:1(9Z))	n/a	C53H92O6	824.689	M-H	-	823.682	6	n/a
M824T59	0.225207	0.00852661	0.00865801	0.0249197	0.0233787	1.39579	exp:con	0.110859	HMDB0048919	TG(16:1(9Z)/18:3(9Z,12Z,15Z)/16:1(9Z))	n/a	C53H92O6	824.689	M-H	-	823.682	6	n/a
M835T133	2.82583	0.000348209	0.0021645	0.00259804	0.0078766	1.42862	exp:con	0.278703	HMDB0001086	Uroporphyrinogen III	C01051	C40H44N4O16	836.275	M-H	-	835.268	0	map00860 Porphyrin and chlorophyll metabolism;map01100 Metabolic pathways;map01110 Biosynthesis of secondary metabolites;map01120 Microbial metabolism in diverse environments;
M835T133	2.82583	0.000348209	0.0021645	0.00259804	0.0078766	1.42862	exp:con	0.278703	HMDB0002211	Uroporphyrinogen I	C05766	C40H44N4O16	836.275	M-H	-	835.268	0	map00860 Porphyrin and chlorophyll metabolism;map01100 Metabolic pathways;map01110 Biosynthesis of secondary metabolites;
M849T69	0.478105	0.00369776	0.004329	0.0133817	0.0134018	1.056	exp:con	0.0689885	HMDB0006901	Heme A	C15670	C49H56FeN4O6	852.355	M-H	-	849.333	4	map00860 Porphyrin and chlorophyll metabolism;map01100 Metabolic pathways;map01110 Biosynthesis of secondary metabolites;
M850T200	5.64285	7.57e-06	0.0021645	0.000258618	0.0078766	1.87344	exp:con	6.97e-07	HMDB0034601	Hebevinoside XI	n/a	C46H74O14	850.508	M-H	-	849.501	1	n/a
M850T200	5.64285	7.57e-06	0.0021645	0.000258618	0.0078766	1.87344	exp:con	6.97e-07	HMDB0035981	Hebevinoside V	n/a	C46H74O14	850.508	M-H	-	849.501	1	n/a
M878T60_1	0.267545	0.00209472	0.004329	0.00891295	0.0134018	1.34874	exp:con	0.144504	HMDB0049297	TG(18:1(11Z)/18:1(9Z)/18:4(6Z,9Z,12Z,15Z))	n/a	C57H98O6	878.736	M-H	-	877.729	2	n/a
M878T60_1	0.267545	0.00209472	0.004329	0.00891295	0.0134018	1.34874	exp:con	0.144504	HMDB0044591	TG(16:0/22:5(7Z,10Z,13Z,16Z,19Z)/16:1(9Z))	n/a	C57H98O6	878.736	M-H	-	877.729	2	n/a
M878T60_1	0.267545	0.00209472	0.004329	0.00891295	0.0134018	1.34874	exp:con	0.144504	HMDB0044693	TG(18:0/14:0/22:6(4Z,7Z,10Z,13Z,16Z,19Z))	n/a	C57H98O6	878.736	M-H	-	877.729	2	n/a
M878T60_1	0.267545	0.00209472	0.004329	0.00891295	0.0134018	1.34874	exp:con	0.144504	HMDB0045094	TG(18:0/18:2(9Z,12Z)/18:4(6Z,9Z,12Z,15Z))	n/a	C57H98O6	878.736	M-H	-	877.729	2	n/a
M878T60_1	0.267545	0.00209472	0.004329	0.00891295	0.0134018	1.34874	exp:con	0.144504	HMDB0048832	TG(16:1(9Z)/20:4(5Z,8Z,11Z,14Z)/18:1(11Z))	n/a	C57H98O6	878.736	M-H	-	877.729	2	n/a
M878T60_1	0.267545	0.00209472	0.004329	0.00891295	0.0134018	1.34874	exp:con	0.144504	HMDB0048471	TG(16:1(9Z)/16:0/22:5(4Z,7Z,10Z,13Z,16Z))	n/a	C57H98O6	878.736	M-H	-	877.729	2	n/a
M878T60_1	0.267545	0.00209472	0.004329	0.00891295	0.0134018	1.34874	exp:con	0.144504	HMDB0048303	TG(14:1(9Z)/20:4(8Z,11Z,14Z,17Z)/20:1(11Z))	n/a	C57H98O6	878.736	M-H	-	877.729	2	n/a
M878T60_1	0.267545	0.00209472	0.004329	0.00891295	0.0134018	1.34874	exp:con	0.144504	HMDB0044105	TG(16:0/18:1(11Z)/20:5(5Z,8Z,11Z,14Z,17Z))	n/a	C57H98O6	878.736	M-H	-	877.729	2	n/a
M878T60_1	0.267545	0.00209472	0.004329	0.00891295	0.0134018	1.34874	exp:con	0.144504	HMDB0048105	TG(14:1(9Z)/18:3(6Z,9Z,12Z)/22:2(13Z,16Z))	n/a	C57H98O6	878.736	M-H	-	877.729	2	n/a
M878T60_1	0.267545	0.00209472	0.004329	0.00891295	0.0134018	1.34874	exp:con	0.144504	HMDB0048126	TG(14:1(9Z)/20:2n6/20:3n6)	n/a	C57H98O6	878.736	M-H	-	877.729	2	n/a
M878T60_1	0.267545	0.00209472	0.004329	0.00891295	0.0134018	1.34874	exp:con	0.144504	HMDB0048684	TG(16:1(9Z)/20:3(5Z,8Z,11Z)/18:2(9Z,12Z))	n/a	C57H98O6	878.736	M-H	-	877.729	2	n/a
M878T60_1	0.267545	0.00209472	0.004329	0.00891295	0.0134018	1.34874	exp:con	0.144504	HMDB0049256	TG(18:1(11Z)/16:1(9Z)/20:4(8Z,11Z,14Z,17Z))	n/a	C57H98O6	878.736	M-H	-	877.729	2	n/a
M878T60_1	0.267545	0.00209472	0.004329	0.00891295	0.0134018	1.34874	exp:con	0.144504	HMDB0048622	TG(16:1(9Z)/18:1(11Z)/20:4(5Z,8Z,11Z,14Z))	n/a	C57H98O6	878.736	M-H	-	877.729	2	n/a
M878T60_1	0.267545	0.00209472	0.004329	0.00891295	0.0134018	1.34874	exp:con	0.144504	HMDB0045302	TG(18:0/18:3(9Z,12Z,15Z)/18:3(6Z,9Z,12Z))	n/a	C57H98O6	878.736	M-H	-	877.729	2	n/a
M878T60_1	0.267545	0.00209472	0.004329	0.00891295	0.0134018	1.34874	exp:con	0.144504	HMDB0049414	TG(18:1(11Z)/18:3(6Z,9Z,12Z)/18:2(9Z,12Z))	n/a	C57H98O6	878.736	M-H	-	877.729	2	n/a
M878T60_1	0.267545	0.00209472	0.004329	0.00891295	0.0134018	1.34874	exp:con	0.144504	HMDB0045120	TG(18:0/18:3(6Z,9Z,12Z)/18:3(9Z,12Z,15Z))	n/a	C57H98O6	878.736	M-H	-	877.729	2	n/a
M878T60_1	0.267545	0.00209472	0.004329	0.00891295	0.0134018	1.34874	exp:con	0.144504	HMDB0048944	TG(16:1(9Z)/18:4(6Z,9Z,12Z,15Z)/20:1(11Z))	n/a	C57H98O6	878.736	M-H	-	877.729	2	n/a
M878T60_1	0.267545	0.00209472	0.004329	0.00891295	0.0134018	1.34874	exp:con	0.144504	HMDB0044876	TG(18:0/14:1(9Z)/22:5(4Z,7Z,10Z,13Z,16Z))	n/a	C57H98O6	878.736	M-H	-	877.729	2	n/a
M878T60_1	0.267545	0.00209472	0.004329	0.00891295	0.0134018	1.34874	exp:con	0.144504	HMDB0048497	TG(16:1(9Z)/18:0/20:5(5Z,8Z,11Z,14Z,17Z))	n/a	C57H98O6	878.736	M-H	-	877.729	2	n/a
M878T60_1	0.267545	0.00209472	0.004329	0.00891295	0.0134018	1.34874	exp:con	0.144504	HMDB0048628	TG(16:1(9Z)/18:1(11Z)/20:4(8Z,11Z,14Z,17Z))	n/a	C57H98O6	878.736	M-H	-	877.729	2	n/a
M878T60_1	0.267545	0.00209472	0.004329	0.00891295	0.0134018	1.34874	exp:con	0.144504	HMDB0049131	TG(18:1(11Z)/16:0/20:5(5Z,8Z,11Z,14Z,17Z))	n/a	C57H98O6	878.736	M-H	-	877.729	2	n/a
M878T60_1	0.267545	0.00209472	0.004329	0.00891295	0.0134018	1.34874	exp:con	0.144504	HMDB0045113	TG(18:0/18:3(6Z,9Z,12Z)/18:3(6Z,9Z,12Z))	n/a	C57H98O6	878.736	M-H	-	877.729	2	n/a
M878T60_1	0.267545	0.00209472	0.004329	0.00891295	0.0134018	1.34874	exp:con	0.144504	HMDB0048120	TG(14:1(9Z)/20:2n6/20:3(5Z,8Z,11Z))	n/a	C57H98O6	878.736	M-H	-	877.729	2	n/a
M878T60_1	0.267545	0.00209472	0.004329	0.00891295	0.0134018	1.34874	exp:con	0.144504	HMDB0048193	TG(14:1(9Z)/22:2(13Z,16Z)/18:3(6Z,9Z,12Z))	n/a	C57H98O6	878.736	M-H	-	877.729	2	n/a
M878T60_1	0.267545	0.00209472	0.004329	0.00891295	0.0134018	1.34874	exp:con	0.144504	HMDB0042383	TG(14:0/18:1(9Z)/22:5(4Z,7Z,10Z,13Z,16Z))	n/a	C57H98O6	878.736	M-H	-	877.729	2	n/a
M878T60_1	0.267545	0.00209472	0.004329	0.00891295	0.0134018	1.34874	exp:con	0.144504	HMDB0042417	TG(14:0/20:1(11Z)/20:5(5Z,8Z,11Z,14Z,17Z))	n/a	C57H98O6	878.736	M-H	-	877.729	2	n/a
M878T60_1	0.267545	0.00209472	0.004329	0.00891295	0.0134018	1.34874	exp:con	0.144504	HMDB0042730	TG(14:0/22:5(4Z,7Z,10Z,13Z,16Z)/18:1(11Z))	n/a	C57H98O6	878.736	M-H	-	877.729	2	n/a
M878T60_1	0.267545	0.00209472	0.004329	0.00891295	0.0134018	1.34874	exp:con	0.144504	HMDB0044133	TG(16:0/18:1(9Z)/20:5(5Z,8Z,11Z,14Z,17Z))	n/a	C57H98O6	878.736	M-H	-	877.729	2	n/a
M878T60_1	0.267545	0.00209472	0.004329	0.00891295	0.0134018	1.34874	exp:con	0.144504	HMDB0047995	TG(14:1(9Z)/20:1(11Z)/20:4(8Z,11Z,14Z,17Z))	n/a	C57H98O6	878.736	M-H	-	877.729	2	n/a
M878T60_1	0.267545	0.00209472	0.004329	0.00891295	0.0134018	1.34874	exp:con	0.144504	HMDB0042388	TG(14:0/18:1(9Z)/22:5(7Z,10Z,13Z,16Z,19Z))	n/a	C57H98O6	878.736	M-H	-	877.729	2	n/a
M878T60_1	0.267545	0.00209472	0.004329	0.00891295	0.0134018	1.34874	exp:con	0.144504	HMDB0048200	TG(14:1(9Z)/22:2(13Z,16Z)/18:3(9Z,12Z,15Z))	n/a	C57H98O6	878.736	M-H	-	877.729	2	n/a
M878T60_1	0.267545	0.00209472	0.004329	0.00891295	0.0134018	1.34874	exp:con	0.144504	HMDB0042648	TG(14:0/20:4(5Z,8Z,11Z,14Z)/20:2n6)	n/a	C57H98O6	878.736	M-H	-	877.729	2	n/a
M878T60_1	0.267545	0.00209472	0.004329	0.00891295	0.0134018	1.34874	exp:con	0.144504	HMDB0044186	TG(16:0/20:3(5Z,8Z,11Z)/18:3(9Z,12Z,15Z))	n/a	C57H98O6	878.736	M-H	-	877.729	2	n/a
M878T60_1	0.267545	0.00209472	0.004329	0.00891295	0.0134018	1.34874	exp:con	0.144504	HMDB0042801	TG(14:0/18:4(6Z,9Z,12Z,15Z)/22:2(13Z,16Z))	n/a	C57H98O6	878.736	M-H	-	877.729	2	n/a
M878T60_1	0.267545	0.00209472	0.004329	0.00891295	0.0134018	1.34874	exp:con	0.144504	HMDB0044272	TG(16:0/18:2(9Z,12Z)/20:4(8Z,11Z,14Z,17Z))	n/a	C57H98O6	878.736	M-H	-	877.729	2	n/a
M878T60_1	0.267545	0.00209472	0.004329	0.00891295	0.0134018	1.34874	exp:con	0.144504	HMDB0005391	TG(16:0/18:2(9Z,12Z)/20:4(5Z,8Z,11Z,14Z))	C00422	C57H98O6	878.736	M-H	-	877.729	2	map00561 Glycerolipid metabolism;map01100 Metabolic pathways;map04714 Thermogenesis;map04923 Regulation of lipolysis in adipocytes;map04931 Insulin resistance;map04975 Fat digestion and absorption;map04977 Vitamin digestion and absorption;map04979 Cholesterol metabolism;
M878T60_1	0.267545	0.00209472	0.004329	0.00891295	0.0134018	1.34874	exp:con	0.144504	HMDB0044179	TG(16:0/20:3(5Z,8Z,11Z)/18:3(6Z,9Z,12Z))	n/a	C57H98O6	878.736	M-H	-	877.729	2	n/a
M878T60_1	0.267545	0.00209472	0.004329	0.00891295	0.0134018	1.34874	exp:con	0.144504	HMDB0047945	TG(14:1(9Z)/18:1(11Z)/22:4(7Z,10Z,13Z,16Z))	n/a	C57H98O6	878.736	M-H	-	877.729	2	n/a
M878T60_1	0.267545	0.00209472	0.004329	0.00891295	0.0134018	1.34874	exp:con	0.144504	HMDB0048210	TG(14:1(9Z)/22:4(7Z,10Z,13Z,16Z)/18:1(9Z))	n/a	C57H98O6	878.736	M-H	-	877.729	2	n/a
M878T60_1	0.267545	0.00209472	0.004329	0.00891295	0.0134018	1.34874	exp:con	0.144504	HMDB0048040	TG(14:1(9Z)/22:1(13Z)/18:4(6Z,9Z,12Z,15Z))	n/a	C57H98O6	878.736	M-H	-	877.729	2	n/a
M878T60_1	0.267545	0.00209472	0.004329	0.00891295	0.0134018	1.34874	exp:con	0.144504	HMDB0042439	TG(14:0/20:3(5Z,8Z,11Z)/20:3n6)	n/a	C57H98O6	878.736	M-H	-	877.729	2	n/a
M878T60_1	0.267545	0.00209472	0.004329	0.00891295	0.0134018	1.34874	exp:con	0.144504	HMDB0042596	TG(14:0/20:2n6/20:4(8Z,11Z,14Z,17Z))	n/a	C57H98O6	878.736	M-H	-	877.729	2	n/a
M878T60_1	0.267545	0.00209472	0.004329	0.00891295	0.0134018	1.34874	exp:con	0.144504	HMDB0048165	TG(14:1(9Z)/20:4(5Z,8Z,11Z,14Z)/20:1(11Z))	n/a	C57H98O6	878.736	M-H	-	877.729	2	n/a
M878T60_1	0.267545	0.00209472	0.004329	0.00891295	0.0134018	1.34874	exp:con	0.144504	HMDB0042881	TG(14:0/22:5(7Z,10Z,13Z,16Z,19Z)/18:1(9Z))	n/a	C57H98O6	878.736	M-H	-	877.729	2	n/a
M878T60_1	0.267545	0.00209472	0.004329	0.00891295	0.0134018	1.34874	exp:con	0.144504	HMDB0042685	TG(14:0/22:2(13Z,16Z)/18:4(6Z,9Z,12Z,15Z))	n/a	C57H98O6	878.736	M-H	-	877.729	2	n/a
M878T60_1	0.267545	0.00209472	0.004329	0.00891295	0.0134018	1.34874	exp:con	0.144504	HMDB0042706	TG(14:0/22:4(7Z,10Z,13Z,16Z)/18:2(9Z,12Z))	n/a	C57H98O6	878.736	M-H	-	877.729	2	n/a
M878T60_1	0.267545	0.00209472	0.004329	0.00891295	0.0134018	1.34874	exp:con	0.144504	HMDB0050014	TG(18:1(9Z)/18:2(9Z,12Z)/18:3(9Z,12Z,15Z))	n/a	C57H98O6	878.736	M-H	-	877.729	2	n/a
M878T60_1	0.267545	0.00209472	0.004329	0.00891295	0.0134018	1.34874	exp:con	0.144504	HMDB0049401	TG(18:1(11Z)/18:2(9Z,12Z)/18:3(9Z,12Z,15Z))	n/a	C57H98O6	878.736	M-H	-	877.729	2	n/a
M878T60_1	0.267545	0.00209472	0.004329	0.00891295	0.0134018	1.34874	exp:con	0.144504	HMDB0048602	TG(16:1(9Z)/16:1(9Z)/22:4(7Z,10Z,13Z,16Z))	n/a	C57H98O6	878.736	M-H	-	877.729	2	n/a
M878T60_1	0.267545	0.00209472	0.004329	0.00891295	0.0134018	1.34874	exp:con	0.144504	HMDB0045309	TG(18:0/18:3(9Z,12Z,15Z)/18:3(9Z,12Z,15Z))	n/a	C57H98O6	878.736	M-H	-	877.729	2	n/a
M878T60_1	0.267545	0.00209472	0.004329	0.00891295	0.0134018	1.34874	exp:con	0.144504	HMDB0045375	TG(18:0/20:5(5Z,8Z,11Z,14Z,17Z)/16:1(9Z))	n/a	C57H98O6	878.736	M-H	-	877.729	2	n/a
M878T60_1	0.267545	0.00209472	0.004329	0.00891295	0.0134018	1.34874	exp:con	0.144504	HMDB0048795	TG(16:1(9Z)/20:2n6/18:3(6Z,9Z,12Z))	n/a	C57H98O6	878.736	M-H	-	877.729	2	n/a
M878T60_1	0.267545	0.00209472	0.004329	0.00891295	0.0134018	1.34874	exp:con	0.144504	HMDB0049250	TG(18:1(11Z)/16:1(9Z)/20:4(5Z,8Z,11Z,14Z))	n/a	C57H98O6	878.736	M-H	-	877.729	2	n/a
M878T60_1	0.267545	0.00209472	0.004329	0.00891295	0.0134018	1.34874	exp:con	0.144504	HMDB0049561	TG(18:1(11Z)/18:3(9Z,12Z,15Z)/18:2(9Z,12Z))	n/a	C57H98O6	878.736	M-H	-	877.729	2	n/a
M878T60_1	0.267545	0.00209472	0.004329	0.00891295	0.0134018	1.34874	exp:con	0.144504	HMDB0048928	TG(16:1(9Z)/18:3(9Z,12Z,15Z)/20:2n6)	n/a	C57H98O6	878.736	M-H	-	877.729	2	n/a
M878T60_1	0.267545	0.00209472	0.004329	0.00891295	0.0134018	1.34874	exp:con	0.144504	HMDB0049231	TG(18:1(11Z)/14:1(9Z)/22:4(7Z,10Z,13Z,16Z))	n/a	C57H98O6	878.736	M-H	-	877.729	2	n/a
M878T60_1	0.267545	0.00209472	0.004329	0.00891295	0.0134018	1.34874	exp:con	0.144504	HMDB0049713	TG(18:1(9Z)/14:0/22:5(4Z,7Z,10Z,13Z,16Z))	n/a	C57H98O6	878.736	M-H	-	877.729	2	n/a
M878T60_1	0.267545	0.00209472	0.004329	0.00891295	0.0134018	1.34874	exp:con	0.144504	HMDB0049876	TG(18:1(9Z)/16:1(9Z)/20:4(8Z,11Z,14Z,17Z))	n/a	C57H98O6	878.736	M-H	-	877.729	2	n/a
M878T60_1	0.267545	0.00209472	0.004329	0.00891295	0.0134018	1.34874	exp:con	0.144504	HMDB0052894	TG(18:3(6Z,9Z,12Z)/18:0/18:3(9Z,12Z,15Z))	n/a	C57H98O6	878.736	M-H	-	877.729	2	n/a
M878T60_1	0.267545	0.00209472	0.004329	0.00891295	0.0134018	1.34874	exp:con	0.144504	HMDB0052539	TG(18:2(9Z,12Z)/18:1(11Z)/18:3(9Z,12Z,15Z))	n/a	C57H98O6	878.736	M-H	-	877.729	2	n/a
M878T60_1	0.267545	0.00209472	0.004329	0.00891295	0.0134018	1.34874	exp:con	0.144504	HMDB0049915	TG(18:1(9Z)/18:1(9Z)/18:4(6Z,9Z,12Z,15Z))	n/a	C57H98O6	878.736	M-H	-	877.729	2	n/a
M878T60_1	0.267545	0.00209472	0.004329	0.00891295	0.0134018	1.34874	exp:con	0.144504	HMDB0049870	TG(18:1(9Z)/16:1(9Z)/20:4(5Z,8Z,11Z,14Z))	n/a	C57H98O6	878.736	M-H	-	877.729	2	n/a
M878T60_1	0.267545	0.00209472	0.004329	0.00891295	0.0134018	1.34874	exp:con	0.144504	HMDB0049895	TG(18:1(9Z)/18:1(11Z)/18:4(6Z,9Z,12Z,15Z))	n/a	C57H98O6	878.736	M-H	-	877.729	2	n/a
M878T60_1	0.267545	0.00209472	0.004329	0.00891295	0.0134018	1.34874	exp:con	0.144504	HMDB0049577	TG(18:1(11Z)/18:4(6Z,9Z,12Z,15Z)/18:1(9Z))	n/a	C57H98O6	878.736	M-H	-	877.729	2	n/a
M878T60_1	0.267545	0.00209472	0.004329	0.00891295	0.0134018	1.34874	exp:con	0.144504	HMDB0049852	TG(18:1(9Z)/14:1(9Z)/22:4(7Z,10Z,13Z,16Z))	n/a	C57H98O6	878.736	M-H	-	877.729	2	n/a
M878T60_1	0.267545	0.00209472	0.004329	0.00891295	0.0134018	1.34874	exp:con	0.144504	HMDB0052532	TG(18:2(9Z,12Z)/18:1(11Z)/18:3(6Z,9Z,12Z))	n/a	C57H98O6	878.736	M-H	-	877.729	2	n/a
M878T60_1	0.267545	0.00209472	0.004329	0.00891295	0.0134018	1.34874	exp:con	0.144504	HMDB0010482	TG(18:2(9Z,12Z)/18:1(9Z)/18:3(9Z,12Z,15Z))	n/a	C57H98O6	878.736	M-H	-	877.729	2	n/a
M878T60_1	0.267545	0.00209472	0.004329	0.00891295	0.0134018	1.34874	exp:con	0.144504	HMDB0052402	TG(18:2(9Z,12Z)/14:0/22:4(7Z,10Z,13Z,16Z))	n/a	C57H98O6	878.736	M-H	-	877.729	2	n/a
M878T60_1	0.267545	0.00209472	0.004329	0.00891295	0.0134018	1.34874	exp:con	0.144504	HMDB0048965	TG(16:1(9Z)/20:4(8Z,11Z,14Z,17Z)/18:1(9Z))	n/a	C57H98O6	878.736	M-H	-	877.729	2	n/a
M878T60_1	0.267545	0.00209472	0.004329	0.00891295	0.0134018	1.34874	exp:con	0.144504	HMDB0048476	TG(16:1(9Z)/16:0/22:5(7Z,10Z,13Z,16Z,19Z))	n/a	C57H98O6	878.736	M-H	-	877.729	2	n/a
M878T60_1	0.267545	0.00209472	0.004329	0.00891295	0.0134018	1.34874	exp:con	0.144504	HMDB0048671	TG(16:1(9Z)/20:1(11Z)/18:4(6Z,9Z,12Z,15Z))	n/a	C57H98O6	878.736	M-H	-	877.729	2	n/a
M878T60_1	0.267545	0.00209472	0.004329	0.00891295	0.0134018	1.34874	exp:con	0.144504	HMDB0048650	TG(16:1(9Z)/18:1(9Z)/20:4(8Z,11Z,14Z,17Z))	n/a	C57H98O6	878.736	M-H	-	877.729	2	n/a
M878T60_1	0.267545	0.00209472	0.004329	0.00891295	0.0134018	1.34874	exp:con	0.144504	HMDB0048964	TG(16:1(9Z)/20:4(8Z,11Z,14Z,17Z)/18:1(11Z))	n/a	C57H98O6	878.736	M-H	-	877.729	2	n/a
M878T60_1	0.267545	0.00209472	0.004329	0.00891295	0.0134018	1.34874	exp:con	0.144504	HMDB0048747	TG(16:1(9Z)/18:2(9Z,12Z)/20:3(5Z,8Z,11Z))	n/a	C57H98O6	878.736	M-H	-	877.729	2	n/a
M878T60_1	0.267545	0.00209472	0.004329	0.00891295	0.0134018	1.34874	exp:con	0.144504	HMDB0048774	TG(16:1(9Z)/18:3(6Z,9Z,12Z)/20:2n6)	n/a	C57H98O6	878.736	M-H	-	877.729	2	n/a
M878T60_1	0.267545	0.00209472	0.004329	0.00891295	0.0134018	1.34874	exp:con	0.144504	HMDB0048753	TG(16:1(9Z)/18:2(9Z,12Z)/20:3n6)	n/a	C57H98O6	878.736	M-H	-	877.729	2	n/a
M878T60_1	0.267545	0.00209472	0.004329	0.00891295	0.0134018	1.34874	exp:con	0.144504	HMDB0005441	TG(16:1(9Z)/18:1(9Z)/20:4(5Z,8Z,11Z,14Z))	C00422	C57H98O6	878.736	M-H	-	877.729	2	map00561 Glycerolipid metabolism;map01100 Metabolic pathways;map04714 Thermogenesis;map04923 Regulation of lipolysis in adipocytes;map04931 Insulin resistance;map04975 Fat digestion and absorption;map04977 Vitamin digestion and absorption;map04979 Cholesterol metabolism;
M878T60_1	0.267545	0.00209472	0.004329	0.00891295	0.0134018	1.34874	exp:con	0.144504	HMDB0049090	TG(18:1(11Z)/14:0/22:5(7Z,10Z,13Z,16Z,19Z))	n/a	C57H98O6	878.736	M-H	-	877.729	2	n/a
M878T60_1	0.267545	0.00209472	0.004329	0.00891295	0.0134018	1.34874	exp:con	0.144504	HMDB0049085	TG(18:1(11Z)/14:0/22:5(4Z,7Z,10Z,13Z,16Z))	n/a	C57H98O6	878.736	M-H	-	877.729	2	n/a
[truncated: 2,619 more rows]
[truncated: 1 more columns]
