# Supplementary material for: A multi-omics analysis strategy reveals the molecular mechanism of the inhibition of Escherichia coli O157:H7 by anthocyanins from Aronia melanocarpa and its application
Source: Royal Society of Chemistry journal article supplement (doi:10.1039/d3fo00406f), 2023-01-01
Supplement: d3fo00406f5.xlsx [file d3fo00406f5.xlsx]

## Sheet: Sheet 1
pathway
